# Supplementary material
Source: publisher figshare collection journal article supplement (https://acs.figshare.com/ndownloader/files/4160971)

## Supporting Information

### One-Pot Primary Aminomethylation of Aryl and Heteroaryl Halides with Sodium Phthalimidomethyltrifluoroborate

Norio Murai,<sup>†,‡</sup> Masayuki Miyano,<sup>‡</sup> Masahiro Yonaga,<sup>\*,†,‡</sup> and Keigo Tanaka<sup>\*,‡</sup>

<sup>†</sup> Graduate School of Pharmaceutical Sciences, University of Tokyo,  
7-3-1 Hongo, Bunkyo-ku, Tokyo 113-0033, Japan

<sup>‡</sup> Discovery Research Laboratories, Eisai Co., Ltd., 5-1-3 Tokodai, Tsukuba, Ibaraki 300-2635, Japan

k6-tanaka@hhc.eisai.co.jp; m-yonaga@hhc.eisai.co.jp

#### Table of Contents

|                                                                                                                                              |          |
|----------------------------------------------------------------------------------------------------------------------------------------------|----------|
| 1. General .....                                                                                                                             | page S1  |
| 2. Preparation of sodium phthalimidomethyltrifluoroborate 1 .....                                                                            | page S1  |
| 3. General experimental procedure for Suzuki-Miyaura cross-coupling reactions with borate 1 .....                                            | page S3  |
| 4. Experimental procedure for preparing compounds 6a–6f .....                                                                                | page S4  |
| 5. Experimental procedure for one-pot direct aminomethylation of aryl and heteroaryl halides, triflates, mesylates, and tosylates 7a–7l..... | page S8  |
| 6. Experimental procedure for preparing compounds 9 and 11 .....                                                                             | page S28 |
| 7. References .....                                                                                                                          | page S30 |
| 8. Spectra for compounds .....                                                                                                               | page S30 |

## 1. General

Nuclear magnetic resonance ( $^1\text{H}$  NMR (400 MHz),  $^{13}\text{C}$  NMR (100MHz)) spectra were determined on a Varian Mercury plus 400 MHz or JEOL-ECA500. Chemical shifts for  $^1\text{H}$  NMR are reported in parts per million down fields from tetramethylsilane ( $\delta$ ) as the internal standard and coupling constants are in hertz (Hz). The following abbreviations are used for spin multiplicity: s = singlet, d = doublet, t = triplet, q = quartet, m = multiplet, br = broad, br. s. = broad singlet. Chemical shifts for  $^{13}\text{C}$  NMR were reported in ppm relative to the center line of a triplet at 77.16 ppm for deuteriochloroform and a septet at 39.52 ppm for hexadeuterodimethyl sulfoxide.  $^{19}\text{F}$  and  $^{11}\text{B}$  spectra were determined on a Avance 400 MHz.  $^{19}\text{F}$  NMR chemical shifts were referenced to external trifluorotoluene (-67.73 ppm).  $^{11}\text{B}$  NMR chemical shifts were referenced to external  $\text{BF}_3 \cdot \text{OEt}_2$  (0.0 ppm).

Infrared (IR) spectra were recorded on a JASCO FT/IR-620 Spectrophotometer and were reported in wavenumbers ( $\text{cm}^{-1}$ ). High resolution mass spectra (HRMS) were obtained on a Waters GCT Premier using electron ionization (EI) method or a ThermoFisherScientific Orbitrap using electro spray ionization (ESI) method. Analytical thin layer chromatography (TLC) was performed on Merck precoated analytical plates, 0.25 mm thick, silica gel 60 F254. Preparative TLC separations were performed on Merck analytical plates 0.50 mm thick precoated with silica gel 60 F254 or  $\text{NH}_2$  F254s. Flash chromatography separations were performed on Merck silica gel 60 (0.040-0.063 mm, 230-400 mesh ASTM).

$\text{Pd}(\text{OAc})_2$ ,  $\text{Pd}(\text{dba})_2$ , and S-phos were purchased from Sigma-Aldrich and were used without further purification.  $\text{Na}_2\text{CO}_3$  was purchased from Kanto Chemicals Co., Inc., and were used without further purification. All Substrates of Table 2 and 3 were purchased from Sigma-Aldrich or Tokyo Chemical Industry Co., Ltd., or Kanto Chemicals Co., Inc., and were used without further purification. 1,4-Dioxane dehydrate and Distilled water were purchased from Kanto Chemicals Co., Inc., and were used without further purification.

## 2. Preparation of sodium phthalimidomethyltrifluoroborate 1 (Scheme 1)

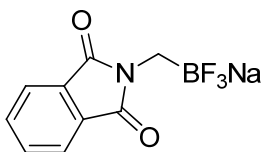

### Preparation of sodium phthalimidomethyltrifluoroborate 1

Phthalimide (6.59 g, 44.8 mmol) was added to a mixture of sodium hydride (1.79 g, 44.8 mmol, 60% purity) and tetrahydrofuran (300 mL) at 0 °C. After the reaction mixture was stirred at room temperature for 1 hour, 2-(bromomethyl)-4,4,5,5-tetramethyl-1,3,2-dioxaborolane (5.38 g, 22.4 mmol, 92% purity) was added at 0 °C. Then, the reaction mixture was stirred at 60 °C for 4 hours before cooling to room temperature. To the reaction mixture was added NaHF<sub>2</sub> (6.25 g, 101 mmol) at 0 °C, and then distilled water (300 mL) was added dropwise to the stirring reaction mixture at the same temperature over 1 hour. The reaction mixture stirred at room temperature for 1 hour, concentrated under reduced pressure. The residue was azeotroped with toluene before drying in vacuo over 5 hours. The resulting solid was added acetone (300 mL) and methanol (30.0 mL), and then the reaction mixture was divided into white solid (a) and filtrate (b) by filtration. The white solid (a) was added methanol (100 mL) and acetone (100 mL), the mixture was filtered. The resulting filtrate was added ethyl acetate (50.0 mL), and then added heptane (ca. 150 mL) until the appearance of the solid. The resulting solid was filtered and dried under reduced pressure to obtain the 1<sup>st</sup> crop of sodium phthalimidomethyltrifluoroborate **1** as a white solid (1.19 g, 4.74 mmol, 21.2%). The filtrate (b) was added ethyl acetate (100 mL), and then filtered. Ethyl acetate (50.0 mL) was added to the filtrate until the appearance of the solid, the mixture was divided into solid (c) and filtrate (d) by filtration. The solid (c) was dried under reduced pressure to obtain the 2<sup>nd</sup> crop of sodium phthalimidomethyltrifluoroborate **1** (826 mg, 3.29 mmol, 17.7%). Ethyl acetate (100 mL) was added to the resulting filtrate (d) until the appearance of the solid, the mixture was divided into solid (e) and filtrate (f) by filtration. The solid (e) was dried under reduced pressure to obtain the 3<sup>rd</sup> crop of sodium phthalimidomethyltrifluoroborate **1** (588 mg, 2.34 mmol, 10.5%). The analytical data was consistent with each other among 1<sup>st</sup> crop, 2<sup>nd</sup> crop, and 3<sup>rd</sup> crop of sodium phthalimidomethyltrifluoroborate **1**.

<sup>1</sup>H NMR (400 MHz, DMSO-*d*<sub>6</sub>) δ 7.72 (s, 4H), 2.56 (q, *J*=5.12 Hz, 2H); <sup>13</sup>C NMR (100 MHz, DMSO-*d*<sub>6</sub>) δ 168.3, 133.5, 132.4, 122.1; <sup>19</sup>F NMR (376.5 MHz, DMSO-*d*<sub>6</sub>) δ -147.0; <sup>11</sup>B NMR (128.4 MHz, DMSO-*d*<sub>6</sub>) δ 3.1; IR (ATR, cm<sup>-1</sup>) 1772, 1706, 1465, 1435, 1401, 1319, 1278, 1188, 1086, 956, 769, 722; HRMS (ESI-) calcd for C<sub>9</sub>H<sub>6</sub>BF<sub>3</sub>NO<sub>2</sub><sup>-</sup> (M-H)<sup>-</sup> 228.0448, found 228.0438.

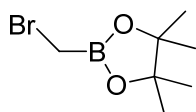

### Preparation of 2-(bromomethyl)-4,4,5,5-tetramethyl-1,3,2-dioxaborolane<sup>1</sup>

To a mixture of triisopropyl borate (20.0 g, 110 mmol), dibromomethane (8.60 mL, 120 mmol) and tetrahydrofuran (150 mL) was added *n*-butyllithium (2.6M *n*-hexane solution, 39 mL 100 mmol) at -78 °C (external temperature) over 1.5 hours. The reaction mixture was stirred at the same temperature for 1.5 hours, and then the reaction mixture was stirred at room temperature for 2 hours. After the mixture was cooled at 0 °C (external temperature), to the reaction mixture was added methanesulfonic acid (6.50 mL, 100 mmol), and then the reaction mixture was stirred at room temperature for 1 hour. After the mixture was cooled at 0 °C (external temperature), to the reaction mixture was added pinacol (12.0 g, 100 mmol), and then the reaction mixture was stirred at room temperature for 1 hour. After the solvent was concentrated, the resulting residue was distilled under reduce pressure (74-76 °C, 8 mmHg), to obtain the title compound (16.0 g, 72.4 mmol, 72.4%).

<sup>1</sup>H NMR (400 MHz, CDCl<sub>3</sub>) δ 2.57 (s, 2H), 1.27 (s, 12H); <sup>13</sup>C NMR (100 MHz, CDCl<sub>3</sub>) δ 84.6, 24.7; IR (ATR, cm<sup>-1</sup>) 2979, 1415, 1372, 1336, 1272, 1214, 1135, 1055, 967, 886, 845, 673; HRMS (EI<sup>+</sup>) calcd for C<sub>7</sub>H<sub>14</sub>BBrO<sub>2</sub> (M)<sup>+</sup> 220.0270, found 220.0315.

### 3. General experimental procedure for Suzuki-Miyaura cross-coupling reactions with borate **1** (Table1)

A Biotage microwave vial was charged with 2-bromo-4-methoxytoluene or 4-chloro-3-methylanisole, Pd(OAc)<sub>2</sub> or Pd(dba)<sub>2</sub>, S-phos, base, sodium phthalimidomethyltrifluoroborate **1**, 1,4-dioxane/distilled water (2/1). The test tube was sealed with a cap, and the reaction mixture was stirred under reflux for 36 hours. The reaction mixture was cooled to room temperature. The reaction mixture was added water and chloroform. Organic layer was concentrated under reduced pressure, then added dibenzyl ether (δ 4.6 (s, 4H) in CDCl<sub>3</sub>) as the internal standard, and yields of compounds **2–4** were determined by <sup>1</sup>HNMR (CDCl<sub>3</sub>). Aqueous layer was added 1N-HCl aq. and chloroform, then extracted with chloroform (x 3). Organic layers were combined and dried over magnesium sulfate, filtered, and concentrated under reduced pressure. The residue was added dibenzyl ether (δ 4.5 (s, 4H) in DMSO-*d*<sub>6</sub>) or triphenyl methane (δ 5.5 (s, 1H) in DMSO-*d*<sub>6</sub>) as the internal standard, and yield of compound **5** was determined by <sup>1</sup>HNMR (DMSO-*d*<sub>6</sub>).

#### 4. Experimental procedure for preparing compounds 6a–6e (Table 2)

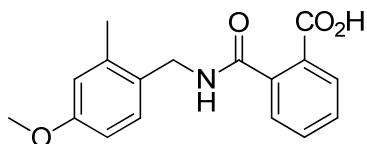

##### Preparation of 2-[[[(4-methoxy-2-methylphenyl)methyl]carbamoyl]benzoic acid (6a) from 4-chloro-3-methylanisole

A Biotage microwave vial was charged with 4-chloro-3-methylanisole (31.3 mg, 0.200 mmol), Pd(OAc)<sub>2</sub> (2.24 mg, 0.010 mmol), S-phos (9.85 mg, 0.024 mmol), Na<sub>2</sub>CO<sub>3</sub> (95.4 mg, 0.900 mmol), sodium phthalimidomethyltrifluoroborate **1** (75.3 mg, 0.300 mmol), 1,4-dioxane (888  $\mu$ L), distilled water (444  $\mu$ L). The test tube was sealed with a cap, and the reaction mixture was stirred under reflux for 36 hours before cooling to room temperature. The reaction mixture was added water and chloroform, and then aqueous layer was washed with chloroform (x 2). Resulting aqueous layer was added aq. HCl (1 N) and chloroform, and then extracted with chloroform (x 3). Organic layers were combined and washed with brine, dried over magnesium sulfate, filtered, and concentrated under reduced pressure. The residue was washed with diethyl ether/heptane solution to afford **6a** (51.0 mg, 85.1%).

<sup>1</sup>H NMR (400 MHz, DMSO-*d*<sub>6</sub>)  $\delta$  12.93 (br. s., 1H), 8.63 (t, *J*=5.49 Hz, 1H), 7.74 (d, *J*=7.68 Hz, 1H), 7.36-7.62 (m, 3H), 7.25 (d, *J*=8.42 Hz, 1H), 6.61-6.79, (m, 2H), 4.31 (d, *J*=5.86 Hz, 2H), 3.70 (s, 3H), 2.28 (s, 3H); <sup>13</sup>C NMR (100 MHz, DMSO-*d*<sub>6</sub>)  $\delta$  168.3, 168.1, 158.2, 138.5, 137.2, 131.1, 131.0, 129.3, 129.1, 129.1, 129.0, 127.8, 115.4, 110.8, 55.0, 40.3, 19.0; IR (ATR, cm<sup>-1</sup>) 3337, 1698, 1650, 1577, 1531, 1420, 1299, 1252; HRMS (ESI<sup>+</sup>) calcd for C<sub>17</sub>H<sub>18</sub>NO<sub>4</sub> (M+H)<sup>+</sup> 300.1230, found 300.1228.

##### Preparation of 2-[[[(4-methoxy-2-methylphenyl)methyl]carbamoyl]benzoic acid (6a) from 2-bromo-4-methoxytoluene

A Biotage microwave vial was charged with 2-bromo-4-methoxytoluene (40.2 mg, 0.200 mmol), Pd(dba)<sub>2</sub> (5.75 mg, 0.010 mmol), S-phos (9.85 mg, 0.024 mmol), Na<sub>2</sub>CO<sub>3</sub> (95.4 mg, 0.900 mmol), sodium phthalimidomethyltrifluoroborate **1** (75.3 mg, 0.300 mmol), 1,4-dioxane (888  $\mu$ L), distilled water (444  $\mu$ L). The test tube was sealed with a cap, and the reaction mixture was stirred under reflux for 36 hours before cooling to room temperature. The reaction mixture was added water and chloroform, and then aqueous layer was washed with chloroform (x 2). Resulting aqueous layer was added aq. HCl (1 N) and chloroform, and then extracted with chloroform (x 3). Organic layers

were combined and washed with brine, dried over magnesium sulfate, filtered, and concentrated under reduced pressure. The residue was washed with diethyl ether/heptane solution to afford **6b** (54.1 mg, 90.3%).

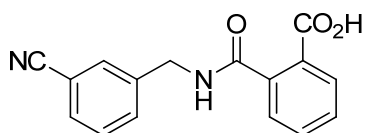

#### Preparation of 2-[(3-cyanophenyl)methyl]carbamoylbenzoic acid (**6b**)

A Biotage microwave vial was charged with 3-chloro-benzonitrile (27.5 mg, 0.200 mmol), Pd(OAc)<sub>2</sub> (2.25 mg, 0.010 mmol), S-phos (9.85 mg, 0.024 mmol), Na<sub>2</sub>CO<sub>3</sub> (95.4 mg, 0.900 mmol), sodium phthalimidomethyltrifluoroborate **1** (75.3 mg, 0.300 mmol), 1,4-dioxane (888 μL), distilled water (444 μL). The test tube was sealed with a cap, and the reaction mixture was stirred under reflux for 36 hours before cooling to room temperature. The reaction mixture was added water and chloroform, and then aqueous layer was washed with chloroform (x 2). Resulting aqueous layer was added aq. HCl (1 N) and chloroform, and then extracted with chloroform (x 3). Organic layers were combined and washed with brine, dried over magnesium sulfate, filtered, and concentrated under reduced pressure. The residue was washed with ethyl acetate and diethyl ether/heptane solution to afford **6b** (47.1 mg, 84.0%).

Commercially available compound: CAS [1156122-53-0]

<sup>1</sup>H NMR (400 MHz, DMSO-*d*<sub>6</sub>) δ 8.94 (br. s., 1H), 7.66-7.89 (m, 4H), 7.39-7.62 (m, 4H), 4.47 (d, *J*=5.85 Hz, 2H); <sup>13</sup>C NMR (100 MHz, DMSO-*d*<sub>6</sub>) δ 168.9, 168.0, 141.2, 138.2, 132.2, 131.3, 130.9, 130.7, 130.6, 129.4, 129.4, 129.3, 127.8, 119.0, 111.2, 41.9; HRMS (ESI<sup>+</sup>) calcd for C<sub>16</sub>H<sub>17</sub>N<sub>2</sub>O<sub>3</sub> (M+H)<sup>+</sup> 281.0921, found 281.0914.

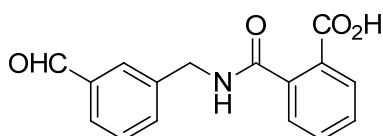

#### Preparation of 2-[(3-formylphenyl)methyl]carbamoylbenzoic acid (**6c**)

A Biotage microwave vial was charged with 3-chloro-benzaldehyde (21.7 mg, 0.150 mmol), Pd(OAc)<sub>2</sub> (1.68 mg, 0.008 mmol), S-phos (7.39 mg, 0.018 mmol), Na<sub>2</sub>CO<sub>3</sub> (71.5 mg, 0.675 mmol), sodium phthalimidomethyltrifluoroborate **1** (56.5 mg, 0.225 mmol), 1,4-dioxane (666 μL), distilled water (333 μL). The test tube was sealed with a cap, and the reaction mixture was stirred under reflux for 36 hours before cooling to room temperature. The reaction mixture was added water and chloroform, and then aqueous layer was washed with chloroform (x 2). Resulting aqueous layer was added aq.

HCl (1 N) and chloroform, and then extracted with chloroform (x 3). Organic layers were combined and washed with brine, dried over magnesium sulfate, filtered, and concentrated under reduced pressure. The residue was washed with ethyl acetate and diethyl ether/heptane solution to afford **6c** (36.5 mg, 85.9%).

$^1\text{H}$  NMR (490 MHz, DMSO- $d_6$ )  $\delta$  10.03 (br. s., 1H), 8.99 (t,  $J=6.0$  Hz, 1H), 7.93 (br, 1H), 7.74-7.81 (m, 3H), 7.49-7.61 (m, 4H), 4.54 (d,  $J=6.0$  Hz, 2H);  $^{13}\text{C}$  NMR (123 MHz, DMSO- $d_6$ )  $\delta$  193.2, 168.8, 168.1, 140.8, 138.2, 136.3, 133.5, 131.2, 131.0, 129.3, 129.3, 129.1, 128.4, 127.8, 127.7, 42.2; IR (ATR,  $\text{cm}^{-1}$ ) 3318, 1698, 1650, 1579, 1534, 1419, 1304, 778, 701; HRMS (ESI+) calcd for  $\text{C}_{16}\text{H}_{14}\text{NO}_4$  ( $\text{M}+\text{H}$ ) $^+$  284.0917, found 284.0915.

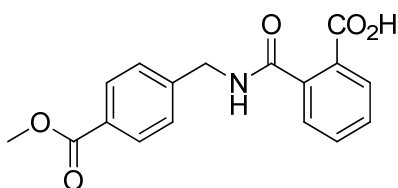

#### Preparation of 2-([4-(methoxycarbonyl)phenyl]methyl)carbamoylbenzoic acid (**6d**)

A Biotage microwave vial was charged with methyl 4-chlorobenzoate (34.1 mg, 0.200 mmol),  $\text{Pd}(\text{OAc})_2$  (2.25 mg, 0.010 mmol), S-phos (9.85 mg, 0.024 mmol),  $\text{Na}_2\text{CO}_3$  (95.4 mg, 0.900 mmol), sodium phthalimidomethyltrifluoroborate **1** (75.3 mg, 0.300 mmol), 1,4-dioxane (888  $\mu\text{L}$ ), distilled water (444  $\mu\text{L}$ ). The test tube was sealed with a cap, and the reaction mixture was stirred under reflux for 36 hours before cooling to room temperature. The reaction mixture was added water and chloroform, and then aqueous layer was washed with chloroform (x 2). Resulting aqueous layer was added aq. HCl (1 N) and chloroform, and then extracted with chloroform (x 3). Organic layers were combined and washed with brine, dried over magnesium sulfate, filtered, and concentrated under reduced pressure. The residue was washed with ethyl acetate and diethyl ether/heptane solution to afford **6d** (54.5 mg, 87.1%).

$^1\text{H}$  NMR (400 MHz, DMSO- $d_6$ )  $\delta$  8.96 (t,  $J=5.86$  Hz, 1H), 7.91 (d,  $J=8.05$  Hz, 2H), 7.73-7.79 (m, 1H), 7.43-7.62 (m, 5H), 4.50 (d,  $J=5.86$  Hz, 2H), 3.83 (s, 3H);  $^{13}\text{C}$  NMR (100 MHz, DMSO- $d_6$ )  $\delta$  168.8, 168.1, 166.2, 145.3, 138.1, 131.2, 131.1, 129.3, 129.2, 129.1, 128.0, 127.7, 127.4, 52.1, 42.3; IR (ATR,  $\text{cm}^{-1}$ ) 3315, 1701, 1649, 1533, 1418, 1218, 1109, 750; HRMS (ESI+) calcd for  $\text{C}_{17}\text{H}_{16}\text{NO}_5$  ( $\text{M}+\text{H}$ ) $^+$  314.1023, found 314.1023.

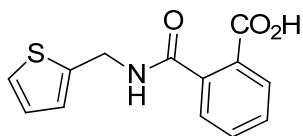

#### Preparation of 2-[(thiophen-2-ylmethyl)carbamoyl]benzoic acid (**6e**)

A Biotage microwave vial was charged with methyl 2-bromothiophene (16.3 mg, 0.100 mmol), Pd(dba)<sub>2</sub> (2.88 mg, 0.010 mmol), S-phos (4.92 mg, 0.012 mmol), Na<sub>2</sub>CO<sub>3</sub> (47.7 mg, 0.450 mmol), sodium phthalimidomethyltrifluoroborate **1** (37.6 mg, 0.150 mmol), 1,4-dioxane (444 μL), distilled water (222 μL). The test tube was sealed with a cap, and the reaction mixture was stirred under reflux for 36 hours before cooling to room temperature. The reaction mixture was added water and chloroform, and then aqueous layer was washed with chloroform (x 2). Resulting aqueous layer was added aq. HCl (1 N) and chloroform, and then extracted with chloroform/tetrahydrofuran = 5/1 (x 3). Organic layers were combined and washed with brine, dried over magnesium sulfate, filtered, and concentrated under reduced pressure. The residue was purified by preparative TLC (silica gel, ethyl acetate/methanol/acetic acid = 100/10/1) to afford **6e** (16.3 mg, 62.3 %).

Commercially available compound: CAS [332361-08-7]

<sup>1</sup>H NMR (400 MHz, DMSO-*d*<sub>6</sub>) δ 12.95 (br. s., 1H), 8.94 (t, *J*=5.86 Hz, 1H), 7.75 (dd, *J*=1.28, 7.50 Hz, 1H), 7.46-7.60 (m, 2H), 7.35-7.42 (m, 2H), 7.04 (dd, *J*=0.91, 3.48 Hz, 1H), 6.95 (dd, *J*=3.29, 5.12 Hz, 1H), 4.57 (d, *J*=5.86 Hz, 2H); <sup>13</sup>C NMR (100 MHz, DMSO-*d*<sub>6</sub>) δ 168.3, 168.0, 142.4, 138.1, 131.2, 131.0, 129.4, 129.2, 127.7, 126.7, 125.3, 124.9, 37.7; HRMS (ESI<sup>+</sup>) calcd for C<sub>13</sub>H<sub>12</sub>NO<sub>3</sub>S (M)<sup>+</sup> 262.0520, found 262.0519.

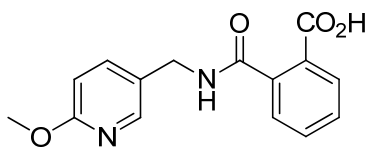

#### Preparation of 2-[(6-methoxypyridin-3-yl)methyl]carbamoyl}benzoic acid (**6f**)

A Biotage microwave vial was charged with methyl 5-chloro-2-methoxypyridine (28.8 mg, 0.200 mmol), Pd(OAc)<sub>2</sub> (2.25 mg, 0.010 mmol), S-phos (9.85 mg, 0.024 mmol), Na<sub>2</sub>CO<sub>3</sub> (95.4 mg, 0.900 mmol), sodium phthalimidomethyltrifluoroborate **1** (75.3 mg, 0.300 mmol), 1,4-dioxane (888 μL), distilled water (444 μL). The test tube was sealed with a cap, and the reaction mixture was stirred under reflux for 36 hours before cooling to room temperature. The reaction mixture was added water and chloroform, and then aqueous layer was washed with chloroform (x 2). Resulting aqueous layer was added aq. HCl (1 N) and chloroform, and then extracted with chloroform/tetrahydrofuran = 5/1 (x

3). Organic layers were combined and washed with brine, dried over magnesium sulfate, filtered, and concentrated under reduced pressure. The residue was purified by preparative TLC (silica gel, ethyl acetate/methanol/acetic acid = 100/10/1) to afford **6f** (24.2 mg, 42.2 %).

Commercially available compound: CAS [1178036-30-0]

<sup>1</sup>H NMR (400 MHz, DMSO-*d*<sub>6</sub>) δ 12.96 (br. s., 1H), 8.80 (t, *J*=5.67 Hz, 1H), 8.14 (s, 1H), 7.74 (dd, *J*=8.05, 17.20 Hz, 2H), 7.47-7.60 (m, 2H), 7.42 (d, *J*=7.32 Hz, 1H), 6.76 (d, *J*=8.42 Hz, 1H), 4.36 (d, *J*=5.85 Hz, 2H), 3.82 (s, 3H); <sup>13</sup>C NMR (100 MHz, CDCl<sub>3</sub>) δ 168.6, 168.0, 162.7, 145.6, 138.9, 138.4, 131.3, 130.8, 129.2, 129.2, 128.0, 127.7, 110.1, 53.1, 39.6; HRMS (ESI+) calcd for C<sub>15</sub>H<sub>15</sub>N<sub>2</sub>O<sub>4</sub> (M+H)<sup>+</sup> 267.1026, found 267.1026.

## 5. Experimental procedure for one-pot aminomethylation of aryl and heteroaryl halides, triflates, mesylates, and tosylates (Table 4 and 5)

### One-pot primary aminomethylation of aryl and heteroaryl halides and triflates (Table 4)

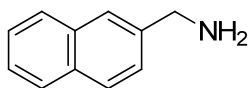

#### Preparation of naphthalen-2-ylmethanamine (**7a**) from 2-chloronaphthalene<sup>2</sup>

A Biotage microwave vial was charged with 2-chloronaphthalene (24.4 mg, 0.150 mmol), Pd(OAc)<sub>2</sub> (1.68 mg, 0.008 mmol), S-phos (7.39 mg, 0.018 mmol), Na<sub>2</sub>CO<sub>3</sub> (71.5 mg, 0.675 mmol), sodium phthalimidomethyltrifluoroborate **1** (56.5 mg, 0.225 mmol), 1,4-dioxane (666 μL), distilled water (333 μL). The test tube was sealed with a cap, and the reaction mixture was stirred under reflux for 36 hours before cooling to room temperature. The reaction mixture was added ethylenediamine (70.1 μL, 1.050 mmol) and 1-propanol (666 μL), and then the reaction mixture was stirred under reflux for 24 hours. The reaction mixture was cooled to room temperature, and then filtered, concentrated under reduced pressure. The residue was added aq. HCl (2 N) and chloroform, and then aqueous layer was washed with chloroform (x 2). Resulting aqueous layer was added aq. NaOH (2 N) and chloroform, then extracted with chloroform (x 2). Organic layers were combined and dried over magnesium sulfate, filtered, and concentrated under reduced pressure. The residue was purified by NH silica gel column chromatography (ethyl acetate/methanol = 20/1) to afford **7a** (20.1 mg, 85.2 %).

Commercially available compound: CAS [118-31-0]

$^1\text{H}$  NMR (400 MHz,  $\text{CDCl}_3$ )  $\delta$  7.82 (d,  $J=8.05$  Hz, 3H), 7.75 (s, 1H), 7.39-7.51 (m, 3H), 4.03 (s, 2H), 1.56 (s, 2H);  $^{13}\text{C}$  NMR (100 MHz,  $\text{CDCl}_3$ )  $\delta$  140.9, 133.7, 132.6, 128.3, 127.8, 127.8, 126.2, 125.9, 125.6, 125.2, 46.8; HRMS (EI+) calcd for  $\text{C}_{11}\text{H}_{11}\text{N}$  (M) $^+$  157.0886, found 157.0965.

#### **Preparation of naphthalen-2-ylmethanamine (7a) from 2-bromonaphthalene**

A Biotage microwave vial was charged with 2-bromonaphthalene (42.7 mg, 0.150 mmol),  $\text{Pd}(\text{dba})_2$  (4.31 mg, 0.008 mmol), S-phos (7.39 mg, 0.018 mmol),  $\text{Na}_2\text{CO}_3$  (71.5 mg, 0.675 mmol), sodium phthalimidomethyltrifluoroborate **1** (56.5 mg, 0.225 mmol), 1,4-dioxane (666  $\mu\text{L}$ ), distilled water (333  $\mu\text{L}$ ). The test tube was sealed with a cap, and the reaction mixture was stirred under reflux for 36 hours before cooling to room temperature. The reaction mixture was added ethylenediamine (70.1  $\mu\text{L}$ , 1.050 mmol) and 1-propanol (666  $\mu\text{L}$ ), and then the reaction mixture was stirred under reflux for 24 hours. The reaction mixture was cooled to room temperature, and then filtered, concentrated under reduced pressure. The residue was added aq. HCl (2 N) and chloroform, and then aqueous layer was washed with chloroform (x 2). Resulting aqueous layer was added aq. NaOH (2 N) and chloroform, then extracted with chloroform (x 2). Organic layers were combined and dried over magnesium sulfate, filtered, and concentrated under reduced pressure. The residue was purified by NH silica gel column chromatography (ethyl acetate/methanol = 20/1) to afford **7a** (18.7 mg, 79.3 %).

#### **Preparation of naphthalen-2-ylmethanamine (7a) from 2-iodonaphthalene**

A Biotage microwave vial was charged with 2-iodonaphthalene (38.1 mg, 0.150 mmol, 95% purity),  $\text{Pd}(\text{dba})_2$  (4.31 mg, 0.008 mmol), S-phos (7.39 mg, 0.018 mmol),  $\text{Na}_2\text{CO}_3$  (71.5 mg, 0.675 mmol), sodium phthalimidomethyltrifluoroborate **1** (56.5 mg, 0.225 mmol), 1,4-dioxane (666  $\mu\text{L}$ ), distilled water (333  $\mu\text{L}$ ). The test tube was sealed with a cap, and the reaction mixture was stirred under reflux for 36 hours before cooling to room temperature. The reaction mixture was added ethylenediamine (70.1  $\mu\text{L}$ , 1.050 mmol) and 1-propanol (666  $\mu\text{L}$ ), and then the reaction mixture was stirred under reflux for 24 hours. The reaction mixture was cooled to room temperature, and then filtered, concentrated under reduced pressure. The residue was added aq. HCl (2 N) and chloroform, and then aqueous layer was washed with chloroform (x 2). Resulting aqueous layer was added aq. NaOH (2 N) and chloroform, then extracted with chloroform (x 2). Organic layers were combined and dried over magnesium sulfate,

filtered, and concentrated under reduced pressure. The residue was purified by NH silica gel column chromatography (ethyl acetate/methanol = 20/1) to afford **7a** (12.4 mg, 52.6 %).

**Preparation of naphthalen-2-ylmethanamine (7a) from 2-naphthyl trifluoromethanesulfonate**

A Biotage microwave vial was charged with 2-naphthyl trifluoromethanesulfonate (41.4 mg, 0.150 mmol), Pd(dba)<sub>2</sub> (4.31 mg, 0.008 mmol), S-phos (7.39 mg, 0.018 mmol), Na<sub>2</sub>CO<sub>3</sub> (71.5 mg, 0.675 mmol), sodium phthalimidomethyltrifluoroborate **1** (56.5 mg, 0.225 mmol), 1,4-dioxane (666 µL), distilled water (333 µL). The test tube was sealed with a cap, and the reaction mixture was stirred under reflux for 15 hours before cooling to room temperature. The reaction mixture was added ethylenediamine (70.1 µL, 1.050 mmol) and 1-propanol (666 µL), and then the reaction mixture was stirred under reflux for 24 hours. The reaction mixture was cooled to room temperature, and then filtered, concentrated under reduced pressure. The residue was added aq. HCl (2 N) and chloroform, and then aqueous layer was washed with chloroform (x 2). Resulting aqueous layer was added aq. NaOH (2 N) and chloroform, then extracted with chloroform (x 2). Organic layers were combined and dried over magnesium sulfate, filtered, and concentrated under reduced pressure. The residue was purified by NH silica gel column chromatography (ethyl acetate/methanol = 20/1) to afford **7a** (17.5 mg, 74.2 %).

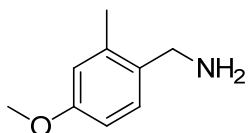

**Preparation of (4-methoxy-2-methylphenyl)methanamine (7b)<sup>3</sup>**

A Biotage microwave vial was charged with 4-chloro-3-methylanisole (31.3 mg, 0.200 mmol), Pd(OAc)<sub>2</sub> (2.25 mg, 0.010 mmol), S-phos (9.85 mg, 0.024 mmol), Na<sub>2</sub>CO<sub>3</sub> (95.4 mg, 0.900 mmol), sodium phthalimidomethyltrifluoroborate **1** (75.3 mg, 0.300 mmol), 1,4-dioxane (888 µL), distilled water (444 µL). The test tube was sealed with a cap, and the reaction mixture was stirred under reflux for 36 hours before cooling to room temperature. The reaction mixture was added ethylenediamine (93.5 µL, 1.400 mmol) and 1-propanol (888 µL), and then the reaction mixture was stirred under reflux for 24 hours. The reaction mixture was cooled to room temperature, and then filtered, concentrated under reduced pressure. The residue was added aq. HCl (2 N) and chloroform, and then aqueous layer was washed with chloroform (x 2). Resulting

aqueous layer was added aq. NaOH (2 N) and chloroform, then extracted with chloroform (x 2). Organic layers were combined and dried over magnesium sulfate, filtered, and concentrated under reduced pressure. The residue was purified by NH silica gel column chromatography (ethyl acetate/methanol = 20/1) to afford **7b** (25.6 mg, 84.6 %).

Commercially available compound: CAS [21883-14-7]

$^1\text{H}$  NMR (400 MHz,  $\text{CDCl}_3$ )  $\delta$  7.19 (d,  $J=9.15$  Hz, 1H), 6.67-6.76 (m, 2H), 3.79 (s, 2H), 3.78 (s, 3H), 2.33 (s, 3H), 1.51 (s, 2H);  $^{13}\text{C}$  NMR (100 MHz,  $\text{CDCl}_3$ )  $\delta$  158.5, 137.1, 133.7, 128.6, 116.2, 111.1, 55.3, 43.7, 19.2; HRMS (EI+) calcd for  $\text{C}_9\text{H}_{13}\text{NO}$  (M) $^+$  151.0992, found 151.1050.

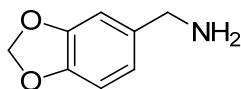

#### Preparation of 2H-1,3-benzodioxol-5-ylmethanamine (**7c**)<sup>4</sup>

A Biotage microwave vial was charged with 5-chloro-1,3-benzodioxole (23.5 mg, 0.150 mmol),  $\text{Pd}(\text{OAc})_2$  (1.68 mg, 0.008 mmol), S-phos (7.39 mg, 0.018 mmol),  $\text{Na}_2\text{CO}_3$  (71.5 mg, 0.675 mmol), sodium phthalimidomethyltrifluoroborate **1** (56.5 mg, 0.225 mmol), 1,4-dioxane (666  $\mu\text{L}$ ), distilled water (333  $\mu\text{L}$ ). The test tube was sealed with a cap, and the reaction mixture was stirred under reflux for 36 hours before cooling to room temperature. The reaction mixture was added ethylenediamine (70.1  $\mu\text{L}$ , 1.050 mmol) and 1-propanol (666  $\mu\text{L}$ ), and then the reaction mixture was stirred under reflux for 24 hours. The reaction mixture was cooled to room temperature, and then filtered, concentrated under reduced pressure. The residue was added aq. HCl (2 N) and chloroform, and then aqueous layer was washed with chloroform (x 2). Resulting aqueous layer was added aq. NaOH (2 N) and chloroform, then extracted with chloroform (x 2). Organic layers were combined and dried over magnesium sulfate, filtered, and concentrated under reduced pressure. The residue was purified by NH silica gel column chromatography (ethyl acetate/methanol = 20/1) to afford **7c** (20.2 mg, 89.1 %).

Commercially available compound: CAS [2620-50-0]

$^1\text{H}$  NMR (400 MHz,  $\text{CDCl}_3$ )  $\delta$  6.79 (s, 1H), 6.70-6.76 (m, 2H), 5.91 (s, 2H), 3.74 (s, 2H), 1.52 (br. s., 2H);  $^{13}\text{C}$  NMR (100 MHz,  $\text{CDCl}_3$ )  $\delta$  147.8, 146.4, 137.5, 120.1, 108.2, 107.8, 100.9, 46.4; HRMS (EI+) calcd for  $\text{C}_8\text{H}_9\text{NO}_2$  (M) $^+$  151.0628, found 151.0704.

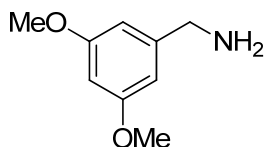

### Preparation of (3,5-dimethoxyphenyl)methanamine (**7d**)<sup>5</sup>

A Biotage microwave vial was charged with 3,5-dimethoxychlorobenzene (25.9 mg, 0.150 mmol), Pd(OAc)<sub>2</sub> (1.68 mg, 0.008 mmol), S-phos (7.39 mg, 0.018 mmol), Na<sub>2</sub>CO<sub>3</sub> (71.5 mg, 0.675 mmol), sodium phthalimidomethyltrifluoroborate **1** (56.5 mg, 0.225 mmol), 1,4-dioxane (666  $\mu$ L), distilled water (333  $\mu$ L). The test tube was sealed with a cap, and the reaction mixture was stirred under reflux for 36 hours before cooling to room temperature. The reaction mixture was added ethylenediamine (70.1  $\mu$ L, 1.050 mmol) and 1-propanol (666  $\mu$ L), and then the reaction mixture was stirred under reflux for 24 hours. The reaction mixture was cooled to room temperature, and then filtered, concentrated under reduced pressure. The residue was added aq. HCl (2 N) and chloroform, and then aqueous layer was washed with chloroform (x 2). Resulting aqueous layer was added aq. NaOH (2 N) and chloroform, then extracted with chloroform (x 2). Organic layers were combined and dried over magnesium sulfate, filtered, and concentrated under reduced pressure. The residue was purified by NH silica gel column chromatography (ethyl acetate/methanol = 20/1) to afford **7d** (22.8 mg, 90.9 %).

Commercially available compound: CAS [34967-24-3]

<sup>1</sup>H NMR (400 MHz, CDCl<sub>3</sub>)  $\delta$  6.47 (d,  $J$ =2.56 Hz, 2H), 6.35 (t,  $J$ =2.38 Hz, 1H), 3.81 (s, 2H), 3.79 (s, 6H), 1.58 (br. s., 2H); <sup>13</sup>C NMR (100 MHz, CDCl<sub>3</sub>)  $\delta$  161.1, 146.0, 104.9, 98.8, 55.4, 46.7; HRMS (EI<sup>+</sup>) calcd for C<sub>9</sub>H<sub>13</sub>NO<sub>2</sub> (M)<sup>+</sup> 167.0941, found 167.1048.

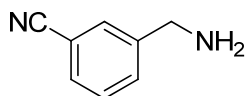

### Preparation of 3-(aminomethyl)benzonitrile (**7e**)<sup>6</sup>

A Biotage microwave vial was charged with 3,5-dimethoxychlorobenzene (21.0 mg, 0.150 mmol, 98% purity), Pd(OAc)<sub>2</sub> (1.68 mg, 0.008 mmol), S-phos (7.39 mg, 0.018 mmol), Na<sub>2</sub>CO<sub>3</sub> (71.5 mg, 0.675 mmol), sodium phthalimidomethyltrifluoroborate **1** (56.5 mg, 0.225 mmol), 1,4-dioxane (666  $\mu$ L), distilled water (333  $\mu$ L). The test tube was sealed with a cap, and the reaction mixture was stirred under reflux for 36 hours before cooling to room temperature. The reaction mixture was added ethylenediamine (70.1  $\mu$ L, 1.050 mmol) and 1-propanol (666  $\mu$ L), and then the reaction mixture was

stirred under reflux for 24 hours. The reaction mixture was cooled to room temperature, and then filtered, concentrated under reduced pressure. The residue was added aq. HCl (2 N) and chloroform, and then aqueous layer was washed with chloroform (x 2). Resulting aqueous layer was added aq. NaOH (2 N) and chloroform, then extracted with chloroform (x 2). Organic layers were combined and dried over magnesium sulfate, filtered, and concentrated under reduced pressure. The residue was purified by NH silica gel column chromatography (ethyl acetate/methanol = 20/1) to afford **7e** (16.1 mg, 81.2 %).

Commercially available compound: CAS [10406-24-3]

$^1\text{H}$  NMR (400 MHz,  $\text{CDCl}_3$ )  $\delta$  7.65 (s, 1H), 7.56 (dd,  $J=7.68$ , 18.66 Hz, 2H), 7.40-7.48 (m, 1H), 3.93 (s, 2H), 1.56 (br. s., 2H);  $^{13}\text{C}$  NMR (100 MHz,  $\text{CDCl}_3$ )  $\delta$  144.5, 131.7, 130.7, 130.5, 129.3, 119.0, 112.4, 45.6.; HRMS (EI+) calcd for  $\text{C}_8\text{H}_8\text{N}_2$  (M) $^+$  132.0687, found 132.0758.

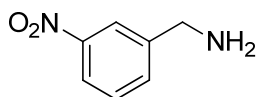

#### Preparation of (3-nitrophenyl)methanamine (**7f**)<sup>7</sup>

A Biotage microwave vial was charged with 3-nitrochlorobenzene (23.6 mg, 0.150 mmol),  $\text{Pd}(\text{OAc})_2$  (1.68 mg, 0.008 mmol), S-phos (7.39 mg, 0.018 mmol),  $\text{Na}_2\text{CO}_3$  (71.5 mg, 0.675 mmol), sodium phthalimidomethyltrifluoroborate **1** (56.5 mg, 0.225 mmol), 1,4-dioxane (666  $\mu\text{L}$ ), distilled water (333  $\mu\text{L}$ ). The test tube was sealed with a cap, and the reaction mixture was stirred under reflux for 36 hours before cooling to room temperature. The reaction mixture was added ethylenediamine (70.1  $\mu\text{L}$ , 1.050 mmol) and 1-propanol (666  $\mu\text{L}$ ), and then the reaction mixture was stirred under reflux for 24 hours. The reaction mixture was cooled to room temperature, and then filtered, concentrated under reduced pressure. The residue was added aq. HCl (2 N) and chloroform, and then aqueous layer was washed with chloroform (x 2). Resulting aqueous layer was added aq. NaOH (2 N) and chloroform, then extracted with chloroform (x 2). Organic layers were combined and dried over magnesium sulfate, filtered, and concentrated under reduced pressure. The residue was purified by NH silica gel column chromatography (ethyl acetate/methanol = 20/1) to afford **7f** (18.9 mg, 82.8 %).

Commercially available compound: CAS [7409-18-9]

$^1\text{H}$  NMR (400 MHz,  $\text{CDCl}_3$ )  $\delta$  8.22 (s, 1H), 8.10 (dd,  $J=1.28$ , 8.23 Hz, 1H), 7.68 (d,  $J=7.68$  Hz, 1H), 7.51 (t,  $J=7.87$  Hz, 1H), 4.01 (s, 2H), 1.59 (s, 2H);  $^{13}\text{C}$  NMR (100 MHz,

CDCl<sub>3</sub>)  $\delta$  148.5, 145.3, 133.4, 129.4, 122.0, 121.9, 45.7.; HRMS (EI<sup>+</sup>) calcd for C<sub>7</sub>H<sub>8</sub>N<sub>2</sub>O<sub>2</sub> (M)<sup>+</sup> 152.0580, found 152.0576.

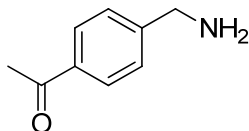

#### Preparation of 1-[4-(aminomethyl)phenyl]ethan-1-one (**7g**)

A Biotage microwave vial was charged with 4'-chlorobenzene (31.9 mg, 0.200 mmol, >97% purity), Pd(OAc)<sub>2</sub> (2.25 mg, 0.010 mmol), S-phos (9.85 mg, 0.024 mmol), Na<sub>2</sub>CO<sub>3</sub> (95.4 mg, 0.900 mmol), sodium phthalimidomethyltrifluoroborate **1** (75.3 mg, 0.300 mmol), 1,4-dioxane (888  $\mu$ L), distilled water (444  $\mu$ L). The test tube was sealed with a cap, and the reaction mixture was stirred under reflux for 36 hours before cooling to room temperature. The reaction mixture was added ethylenediamine (93.5  $\mu$ L, 1.400 mmol) and 1-propanol (888  $\mu$ L), and then the reaction mixture was stirred under reflux for 24 hours. The reaction mixture was cooled to room temperature, and then filtered, concentrated under reduced pressure. The residue was added aq. HCl (2 N) and chloroform, and then aqueous layer was washed with chloroform (x 2). Resulting aqueous layer was added aq. NaOH (2 N) and chloroform, then extracted with chloroform (x 2). Organic layers were combined and dried over magnesium sulfate, filtered, and concentrated under reduced pressure. The residue was purified by NH silica gel column chromatography (ethyl acetate/methanol = 20/1) to afford **7g** (22.4 mg, 75.1 %).

Commercially available compound: CAS [87171-25-3]

<sup>1</sup>H NMR (490 MHz, CDCl<sub>3</sub>)  $\delta$  7.94 (d, *J*=7.8 Hz, 2H), 7.42 (d, *J*=8.3 Hz, 2H), 3.95 (s, 2H), 2.60 (s, 3H), 1.48 (br. s., 2H); <sup>13</sup>C NMR (123 MHz, CDCl<sub>3</sub>)  $\delta$  197.9, 148.8, 135.9, 128.7, 127.2, 46.2, 26.7.; HRMS (ESI<sup>+</sup>) calcd for C<sub>9</sub>H<sub>12</sub>NO (M)<sup>+</sup> 150.0913, found 150.0913.

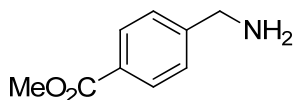

#### Preparation of methyl 4-(aminomethyl)benzoate (**7h**)<sup>8</sup>

After isolation of 2-([4-(methoxycarbonyl)phenyl]methyl)carbamoylbenzoic acid (**6d**) from methyl 4-chlorobenzoate (0.2 mmol), a Biotage microwave vial was charged with 2-([4-(methoxycarbonyl)phenyl]methyl)carbamoylbenzoic acid, ethylenediamine (93.5  $\mu$ L, 1.400 mmol) and *t*-butanol (1.5 mL). The test tube was

sealed with a cap, and the reaction mixture was stirred under reflux for 24 hours before cooling to room temperature. The reaction mixture was filtered, concentrated under reduced pressure. The residue was purified by NH silica gel column chromatography (ethyl acetate/methanol = 20/1) to afford **7h** (23.0 mg, 69.5 %).

Commercially available compound: CAS [18469-52-8]

$^1\text{H}$  NMR (400 MHz,  $\text{CDCl}_3$ )  $\delta$  8.01 (d,  $J=8.05$  Hz, 2H), 7.39 (d,  $J=8.05$  Hz, 2H), 3.94 (s, 2H), 3.91 (s, 3H), 1.54 (s, 2H);  $^{13}\text{C}$  NMR (100 MHz,  $\text{CDCl}_3$ )  $\delta$  167.1, 148.5, 130.0, 128.8, 127.0, 52.2, 46.3; HRMS (EI+) calcd for  $\text{C}_9\text{H}_{11}\text{NO}_2$  ( $\text{M}$ ) $^+$  165.0790, found 165.0791.

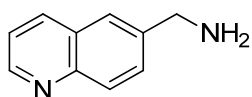

#### Preparation of quinolin-6-ylmethanamine (**7i**)<sup>9</sup> from 6-chloroquinoline

A Biotage microwave vial was charged with 6-chloroquinoline (24.5 mg, 0.150 mmol),  $\text{Pd}(\text{OAc})_2$  (1.68 mg, 0.008 mmol), S-phos (7.39 mg, 0.018 mmol),  $\text{Na}_2\text{CO}_3$  (71.5 mg, 0.675 mmol), sodium phthalimidomethyltrifluoroborate **1** (56.5 mg, 0.225 mmol), 1,4-dioxane (666  $\mu\text{L}$ ), distilled water (333  $\mu\text{L}$ ). The test tube was sealed with a cap, and the reaction mixture was stirred under reflux for 36 hours before cooling to room temperature. The reaction mixture was added ethylenediamine (70.1  $\mu\text{L}$ , 1.050 mmol) and 1-propanol (666  $\mu\text{L}$ ), and then the reaction mixture was stirred under reflux for 24 hours. The reaction mixture was cooled to room temperature, and then filtered, concentrated under reduced pressure. The residue was added chloroform and water, and then extracted with chloroform (x 2). Organic layers were combined and dried over magnesium sulfate, filtered, and concentrated under reduced pressure. The residue was purified by preparative TLC (NH silica gel, ethyl acetate/methanol/ = 15/1) to afford **7i** (19.1 mg, 80.5 %).

Commercially available compound: CAS [99071-54-2]

$^1\text{H}$  NMR (400 MHz,  $\text{CDCl}_3$ )  $\delta$  8.87 (dd,  $J=1.65, 4.21$  Hz, 1H), 8.02-8.14 (m, 2H), 7.71 (s, 1H), 7.65 (dd,  $J=2.01, 8.60$  Hz, 1H), 7.36 (dd,  $J=4.21, 8.23$  Hz, 1H), 4.04 (s, 2H), 1.69 (br. s., 2H);  $^{13}\text{C}$  NMR (100 MHz,  $\text{CDCl}_3$ )  $\delta$  150.0, 147.5, 141.4, 135.8, 129.5, 129.4, 128.2, 124.7, 121.2, 46.2; HRMS (EI+) calcd for  $\text{C}_{10}\text{H}_{10}\text{N}_2$  ( $\text{M}$ ) $^+$  158.0838, found 158.0881.

#### Preparation of quinolin-6-ylmethanamine (**7i**) from 6-bromoquinoline

A Biotage microwave vial was charged with 6-bromoquinoline (31.2 mg, 0.150 mmol),  $\text{Pd}(\text{dba})_2$  (4.31 mg, 0.008 mmol), S-phos (7.39 mg, 0.018 mmol),  $\text{Na}_2\text{CO}_3$  (71.5

mg, 0.675 mmol), sodium phthalimidomethyltrifluoroborate **1** (56.5 mg, 0.225 mmol), 1,4-dioxane (666  $\mu$ L), distilled water (333  $\mu$ L). The test tube was sealed with a cap, and the reaction mixture was stirred under reflux for 36 hours before cooling to room temperature. The reaction mixture was added ethylenediamine (70.1  $\mu$ L, 1.050 mmol) and 1-propanol (666  $\mu$ L), and then the reaction mixture was stirred under reflux for 24 hours. The reaction mixture was cooled to room temperature, and then filtered, concentrated under reduced pressure. The residue was added chloroform and water, and then extracted with chloroform (x 2). Organic layers were combined and dried over magnesium sulfate, filtered, and concentrated under reduced pressure. The residue was purified by preparative TLC (NH silica gel, ethyl acetate/methanol/ = 15/1) to afford **7i** (18.6 mg, 78.4 %).

#### **Preparation of quinolin-6-ylmethanamine (7i) from quinolin-6-yl trifluoromethanesulfonate**

A Biotage microwave vial was charged with quinolin-6-yl trifluoromethanesulfonate (42.9 mg, 0.150 mmol, 97% purity), Pd(dba)<sub>2</sub> (4.31 mg, 0.008 mmol), S-phos (7.39 mg, 0.018 mmol), Na<sub>2</sub>CO<sub>3</sub> (71.5 mg, 0.675 mmol), sodium phthalimidomethyltrifluoroborate **1** (56.5 mg, 0.225 mmol), 1,4-dioxane (666  $\mu$ L), distilled water (333  $\mu$ L). The test tube was sealed with a cap, and the reaction mixture was stirred under reflux for 36 hours before cooling to room temperature. The reaction mixture was added ethylenediamine (70.1  $\mu$ L, 1.050 mmol) and 1-propanol (666  $\mu$ L), and then the reaction mixture was stirred under reflux for 24 hours. The reaction mixture was cooled to room temperature, and then filtered, concentrated under reduced pressure. The residue was added chloroform and water, and then extracted with chloroform (x 2). Organic layers were combined and dried over magnesium sulfate, filtered, and concentrated under reduced pressure. The residue was purified by preparative TLC (NH silica gel, ethyl acetate/methanol/ = 15/1) to afford **7i** (18.1 mg, 76.3 %).

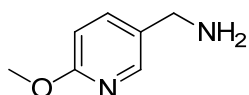

#### **Preparation of (2-methyl-1,3-benzothiazol-5-yl)methanamine (7j)**

To a solution of 5-Chloro-2-methoxypyridine (86.1 mg, 0.600 mmol), Pd(OAc)<sub>2</sub> (13.5 mg, 0.060 mmol), S-phos (59.1 mg, 0.144 mmol), Na<sub>2</sub>CO<sub>3</sub> (286 mg, 2.700 mmol), sodium phthalimidomethyltrifluoroborate **1** (226 mg, 0.900 mmol), 1,4-dioxane (4.0 mL), distilled water (2.0 mL) was stirred under reflux for 48 hours before cooling to

room temperature. The reaction mixture was added ethylenediamine (281  $\mu$ L, 4.20 mmol) and 1-propanol (4.0 mL), and then the reaction mixture was stirred under reflux for 24 hours. The reaction mixture was cooled to room temperature, and then filtered, concentrated under reduced pressure. The residue was added chloroform and water, and then extracted with chloroform (x 2). Organic layers were combined and dried over magnesium sulfate, filtered, and concentrated under reduced pressure. The residue was purified by preparative TLC (NH silica gel, ethyl acetate/methanol/ = 15/1) to afford **7i** (50.6 mg, 61.0 %).

Commercially available compound: CAS [262295-96-5]

$^1\text{H}$  NMR (400 MHz,  $\text{CDCl}_3$ )  $\delta$  8.08 (d,  $J=2.20$  Hz, 1H), 7.57 (dd,  $J=2.20$ , 8.42 Hz, 1H), 6.73 (d,  $J=8.78$  Hz, 1H), 3.93 (s, 3H), 3.81 (s, 2H), 1.50 (br. s., 2H);  $^{13}\text{C}$  NMR (100 MHz,  $\text{CDCl}_3$ )  $\delta$  145.5, 138.4, 131.3, 131.3, 110.9, 53.5, 43.5; HRMS (EI $^+$ ) calcd for  $\text{C}_7\text{H}_{10}\text{N}_2\text{O}$  (M) $^+$  138.0788, found 138.0796.

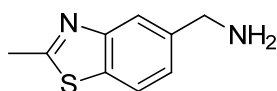

#### Preparation of (2-methyl-1,3-benzothiazol-5-yl)methanamine (**7k**)

A Biotage microwave vial was charged with 5-chloro-2-methyl-1,3-benzothiazole (18.4 mg, 0.100 mmol),  $\text{Pd}(\text{OAc})_2$  (1.12 mg, 0.005 mmol), S-phos (4.93 mg, 0.012 mmol),  $\text{Na}_2\text{CO}_3$  (47.7 mg, 0.450 mmol), sodium phthalimidomethyltrifluoroborate **1** (37.6 mg, 0.150 mmol), 1,4-dioxane (444  $\mu$ L), distilled water (222  $\mu$ L). The test tube was sealed with a cap, and the reaction mixture was stirred under reflux for 36 hours before cooling to room temperature. The reaction mixture was added ethylenediamine (46.7  $\mu$ L, 0.700 mmol) and 1-propanol (444  $\mu$ L), and then the reaction mixture was stirred under reflux for 24 hours. The reaction mixture was cooled to room temperature, and then filtered, concentrated under reduced pressure. The residue was added chloroform and water, and then extracted with chloroform (x 2). Organic layers were combined and dried over magnesium sulfate, filtered, and concentrated under reduced pressure. The residue was purified by preparative TLC (NH silica gel, ethyl acetate/methanol/ = 20/1) to afford **7k** (14.8 mg, 83.0 %).

$^1\text{H}$  NMR (400 MHz,  $\text{CDCl}_3$ )  $\delta$  7.87 (d,  $J=0.73$  Hz, 1H), 7.77 (d,  $J=8.05$  Hz, 1H), 7.32 (dd,  $J=1.46$ , 8.05 Hz, 1H), 4.00 (s, 2H), 2.83 (s, 3H), 1.63 (br. s., 2H);  $^{13}\text{C}$  NMR (100 MHz,  $\text{CDCl}_3$ )  $\delta$  167.5, 153.9, 141.8, 134.0, 124.4, 121.5, 120.6, 46.5, 20.3; IR (ATR,  $\text{cm}^{-1}$ ) 3283, 2918, 1568, 1521, 1453, 1422, 1373, 1328, 1300, 1171, 890, 806; HRMS (EI $^+$ ) calcd for  $\text{C}_9\text{H}_{10}\text{N}_2\text{S}$  (M) $^+$  178.0559, found 178.0625.

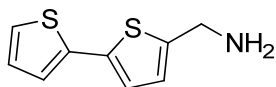

### Preparation of [5-(thiophen-2-yl)thiophen-2-yl]methanamine (**71**)<sup>10</sup>

A Biotage microwave vial was charged with 2-bromo-5-(thiophen-2-yl)thiophene (49.0 mg, 0.200 mmol), Pd(dba)<sub>2</sub> (5.75 mg, 0.010 mmol), S-phos (9.85 mg, 0.024 mmol), Na<sub>2</sub>CO<sub>3</sub> (95.4 mg, 0.900 mmol), sodium phthalimidomethyltrifluoroborate **1** (75.3 mg, 0.300 mmol), 1,4-dioxane (888  $\mu$ L), distilled water (444  $\mu$ L). The test tube was sealed with a cap, and the reaction mixture was stirred under reflux for 36 hours before cooling to room temperature. The reaction mixture was added ethylenediamine (93.5  $\mu$ L, 1.400 mmol) and 1-propanol (888  $\mu$ L), and then the reaction mixture was stirred under reflux for 24 hours. The reaction mixture was cooled to room temperature, and then filtered, concentrated under reduced pressure. The residue was added aq. HCl (2 N) and chloroform, and then aqueous layer was washed with chloroform (x 2). Resulting aqueous layer was added aq. NaOH (2 N) and chloroform, then extracted with chloroform (x 2). Organic layers were combined and dried over magnesium sulfate, filtered, and concentrated under reduced pressure. The residue was purified by NH silica gel column chromatography (ethyl acetate/methanol = 20/1) to afford **71** (22.4 mg, 57.3 %).

Commercially available compound: CAS [4380-96-5]

<sup>1</sup>H NMR (400 MHz, CDCl<sub>3</sub>)  $\delta$  7.18 (dd,  $J$ =0.73, 5.12 Hz, 1H), 7.10-7.15 (m, 1H), 6.95-7.03 (m, 2H), 6.80 (d,  $J$ =3.29 Hz, 1H), 4.02 (s, 2H), 1.63 (br. s., 2H); <sup>13</sup>C NMR (100 MHz, CDCl<sub>3</sub>)  $\delta$  146.8, 137.8, 136.1, 127.9, 124.3, 124.2, 123.5, 123.5, 41.7.; HRMS (EI<sup>+</sup>) calcd for C<sub>9</sub>H<sub>9</sub>NS<sub>2</sub> (M)<sup>+</sup> 180.0786, found 180.0822.

### One-pot primary aminomethylation of aryl and heteroaryl mesylates and tosylates (Table 5)

#### Preparation of naphthalen-2-ylmethanamine (**7a**) from naphthalene-2-yl methanesulfonate

A Biotage microwave vial was charged with naphthalene-2-yl methanesulfonate (33.3 mg, 0.150 mmol), Pd(OAc)<sub>2</sub> (2.47 mg, 0.011 mmol), S-phos (11.1 mg, 0.027 mmol), Na<sub>2</sub>CO<sub>3</sub> (71.5 mg, 0.675 mmol), sodium phthalimidomethyltrifluoroborate **1** (56.5 mg, 0.225 mmol), 1,4-dioxane (666  $\mu$ L), distilled water (333  $\mu$ L). The test tube was sealed with a cap, and the reaction mixture was stirred under reflux for 48 hours before cooling to room temperature. The reaction mixture was added ethylenediamine

(70.1  $\mu$ L, 1.050 mmol) and 1-propanol (666  $\mu$ L), and then the reaction mixture was stirred under reflux for 24 hours. The reaction mixture was cooled to room temperature, and then filtered, concentrated under reduced pressure. The residue was added aq. HCl (2 N) and chloroform, and then aqueous layer was washed with chloroform (x 2). Resulting aqueous layer was added aq. NaOH (2 N) and chloroform, then extracted with chloroform (x 2). Organic layers were combined and dried over magnesium sulfate, filtered, and concentrated under reduced pressure. The residue was purified by NH silica gel column chromatography (ethyl acetate/methanol = 20/1) to afford **7a** (18.9 mg, 80.1 %).

#### **Preparation of naphthalen-2-ylmethanamine (7a) from naphthalen-2-yl 4-methylbenzene-1-sulfonate**

A Biotage microwave vial was charged with naphthalen-2-yl 4-methylbenzene-1-sulfonate (44.8 mg, 0.150 mmol), Pd(OAc)<sub>2</sub> (2.47 mg, 0.011 mmol), S-phos (11.1 mg, 0.027 mmol), Na<sub>2</sub>CO<sub>3</sub> (71.5 mg, 0.675 mmol), sodium phthalimidomethyltrifluoroborate **1** (56.5 mg, 0.225 mmol), 1,4-dioxane (666  $\mu$ L), distilled water (333  $\mu$ L). The test tube was sealed with a cap, and the reaction mixture was stirred under reflux for 48 hours before cooling to room temperature. The reaction mixture was added ethylenediamine (70.1  $\mu$ L, 1.050 mmol) and 1-propanol (666  $\mu$ L), and then the reaction mixture was stirred under reflux for 24 hours. The reaction mixture was cooled to room temperature, and then filtered, concentrated under reduced pressure. The residue was added aq. HCl (2 N) and chloroform, and then aqueous layer was washed with chloroform (x 2). Resulting aqueous layer was added aq. NaOH (2 N) and chloroform, then extracted with chloroform (x 2). Organic layers were combined and dried over magnesium sulfate, filtered, and concentrated under reduced pressure. The residue was purified by NH silica gel column chromatography (ethyl acetate/methanol = 20/1) to afford **7a** (20.1 mg, 85.2 %).

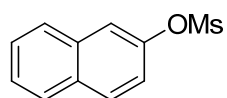

#### **Preparation of naphthalene-2-yl methanesulfonate<sup>1</sup>**

To a solution of 2-naphtol (3.00 g, 20.8 mmol) and pyridine (10.0 mL) in dichloromethane (20.0 mL) was added methanesulfonyl chloride (2.10 mL, 27.0 mmol) at 0 °C. The reaction mixture was stirring at room temperature for 12 hours. The reaction mixture was quenched with saturated aqueous ammonium chloride, and the

resulting mixture was extracted with ethyl acetate. The combined organic extracts were washed with brine, dried over magnesium sulfate, filtered, and concentrated under reduced pressure. The residual oil was purified by silica gel column chromatography (heptane/ethyl acetate = 4/1 to 2/1) to afford naphthalene-2-yl methanesulfonate (4.10 g, 89.1%).

Commercially available compound: CAS [10290-91-2]

$^1\text{H}$  NMR (400 MHz,  $\text{CDCl}_3$ )  $\delta$  7.82-7.92 (m, 3H), 7.76 (d,  $J=2.20$  Hz, 1H), 7.49-7.58 (m, 2H), 7.41 (ddd,  $J=1.10, 2.38, 8.97$  Hz, 1H), 3.18 (d,  $J=1.10$  Hz, 3H);  $^{13}\text{C}$  NMR (100 MHz,  $\text{CDCl}_3$ )  $\delta$  146.9, 133.7, 132.2, 130.4, 128.0, 128.0, 127.3, 126.7, 120.9, 119.6, 37.5; HRMS (EI+) calcd for  $\text{C}_{11}\text{H}_{10}\text{O}_3\text{S}$  (M) $^+$  222.0351, found 222.0370.

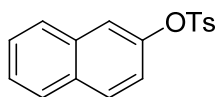

#### Preparation of naphthalene-2-yl 4-methylbenzenesulfonate<sup>1</sup>

To a solution of 2-naphthol (3.00 g, 20.8 mmol) and pyridine (10.0 mL) in  $\text{CH}_2\text{Cl}_2$  (20.0 mL) was added p-toluenesulfonyl chloride (5.20 g, 27.3 mmol) at 0 °C. The reaction mixture was stirring at room temperature for 12 hours. The reaction mixture was quenched with saturated aqueous ammonium chloride, and the resulting mixture was extracted with ethyl acetate. The combined organic extracts were washed with brine, dried over magnesium sulfate, filtered, and concentrated under reduced pressure. The residual oil was purified by silica gel column chromatography (heptane/ethyl acetate = 4/1 to 2/1) to afford naphthalene-2-yl 4-methylbenzenesulfonate (3.20 g, 51.6%).

Commercially available compound: CAS [7385-85-5]

$^1\text{H}$  NMR (400 MHz,  $\text{CDCl}_3$ )  $\delta$  7.77-7.84 (m, 1H), 7.70-7.77 (m, 4H), 7.44-7.51 (m, 3H), 7.29 (d,  $J=8.05$  Hz, 2H), 7.09 (dd,  $J=2.38, 8.97$  Hz, 1H), 2.44 (s, 3H);  $^{13}\text{C}$  NMR (100 MHz,  $\text{CDCl}_3$ )  $\delta$  147.3, 145.5, 133.6, 132.6, 132.0, 129.9, 129.9, 128.7, 128.0, 127.9, 127.0, 126.5, 121.3, 120.1, 21.9; HRMS (EI+) calcd for  $\text{C}_{17}\text{H}_{14}\text{O}_3\text{S}$  (M) $^+$  298.0664, found 298.0612.

#### Preparation of (3,5-dimethoxyphenyl)methanamine (7d) from 3,5-dimethoxyphenyl methanesulfonate

A Biotage microwave vial was charged with 3,5-dimethoxyphenyl methanesulfonate (34.8 mg, 0.150 mmol),  $\text{Pd}(\text{OAc})_2$  (2.47 mg, 0.011 mmol), S-phos (11.1 mg, 0.027 mmol),  $\text{Na}_2\text{CO}_3$  (71.5 mg, 0.675 mmol), sodium phthalimidomethyltrifluoroborate **1** (56.5 mg, 0.225 mmol), 1,4-dioxane (666  $\mu\text{L}$ ), distilled water (333  $\mu\text{L}$ ). The test tube was sealed with a cap, and the reaction mixture was stirred under reflux for 48 hours

before cooling to room temperature. The reaction mixture was added ethylenediamine (70.1  $\mu$ L, 1.050 mmol) and 1-propanol (666  $\mu$ L), and then the reaction mixture was stirred under reflux for 24 hours. The reaction mixture was cooled to room temperature, and then filtered, concentrated under reduced pressure. The residue was added aq. HCl (2 N) and chloroform, and then aqueous layer was washed with chloroform (x 2). Resulting aqueous layer was added aq. NaOH (2 N) and chloroform, then extracted with chloroform (x 2). Organic layers were combined and dried over magnesium sulfate, filtered, and concentrated under reduced pressure. The residue was purified by NH silica gel column chromatography (ethyl acetate/methanol = 20/1) to afford **7d** (17.5 mg, 70.0 %).

**Preparation of (3,5-dimethoxyphenyl)methanamine (7d) from 3,5-dimethoxyphenyl 4-methylbenzene-1-sulfonate**

A Biotage microwave vial was charged with 3,5-dimethoxyphenyl 4-methylbenzene-1-sulfonate (46.3 mg, 0.150 mmol), Pd(OAc)<sub>2</sub> (2.47 mg, 0.011 mmol), S-phos (11.1 mg, 0.027 mmol), Na<sub>2</sub>CO<sub>3</sub> (71.5 mg, 0.675 mmol), sodium phthalimidomethyltrifluoroborate **1** (56.5 mg, 0.225 mmol), 1,4-dioxane (666  $\mu$ L), distilled water (333  $\mu$ L). The test tube was sealed with a cap, and the reaction mixture was stirred under reflux for 48 hours before cooling to room temperature. The reaction mixture was added ethylenediamine (70.1  $\mu$ L, 1.050 mmol) and 1-propanol (666  $\mu$ L), and then the reaction mixture was stirred under reflux for 24 hours. The reaction mixture was cooled to room temperature, and then filtered, concentrated under reduced pressure. The residue was added aq. HCl (2 N) and chloroform, and then aqueous layer was washed with chloroform (x 2). Resulting aqueous layer was added aq. NaOH (2 N) and chloroform, then extracted with chloroform (x 2). Organic layers were combined and dried over magnesium sulfate, filtered, and concentrated under reduced pressure. The residue was purified by NH silica gel column chromatography (ethyl acetate/methanol = 20/1) to afford **7d** (20.1 mg, 80.1 %).

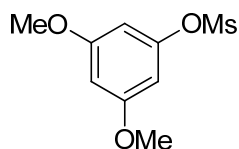

**Preparation of 3,5-dimethoxyphenyl methanesulfonate**

To a solution of 3,5-dimethoxyphenol (1.50 g, 9.54 mmol) and pyridine (3.00 mL) in dichloromethane (20.0 mL) was added methanesulfonyl chloride (964  $\mu$ L, 12.4 mmol) at 0  $^{\circ}$ C. The reaction mixture was stirring at room temperature for 12 hours. The

reaction mixture was quenched with water, and the resulting mixture was extracted with ethyl acetate. The organic extracts were washed with brine, dried over magnesium sulfate, filtered, and concentrated under reduced pressure. The residual oil was purified by silica gel column chromatography (heptane/ethyl acetate = 2/1 to 3/2) to afford 3,5-dimethoxyphenyl methanesulfonate (2.14 g, 96.8%).

$^1\text{H}$  NMR (400 MHz,  $\text{CDCl}_3$ )  $\delta$  6.44 (d,  $J=2.20$  Hz, 2H), 6.38-6.42 (m, 1H), 3.78 (s, 6H), 3.13 (s, 3H);  $^{13}\text{C}$  NMR (100 MHz,  $\text{CDCl}_3$ )  $\delta$  161.5, 150.8, 100.6, 99.5, 55.7, 37.4; HRMS (EI $^+$ ) calcd for  $\text{C}_9\text{H}_{12}\text{O}_5\text{S}$  (M) $^+$  232.0400, found 232.0484.

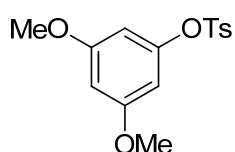

### Preparation of 3,5-dimethoxyphenyl 4-methylbenzene-1-sulfonate<sup>11</sup>

To a solution of 3,5-dimethoxyphenol (1.50 g, 9.54 mmol) and pyridine (3.00 mL) in dichloromethane (20.0 mL) was added p-toluenesulfonyl chloride (4.40 g, 22.9 mmol) at 0 °C. The reaction mixture was stirring at room temperature for 12 hours. The reaction mixture was quenched with water, and the resulting mixture was extracted with ethyl acetate. The organic extracts were washed with brine, dried over magnesium sulfate, filtered, and concentrated under reduced pressure. The residual oil was purified by NH silica gel column chromatography (heptane/ethyl acetate = 4/1 to 2/1) to afford 3,5-dimethoxyphenyl 4-methylbenzene-1-sulfonate (2.65 g, 88.3%).

$^1\text{H}$  NMR (400 MHz,  $\text{CDCl}_3$ )  $\delta$  7.74 (d,  $J=8.42$  Hz, 2H), 7.31 (d,  $J=8.05$  Hz, 2H), 6.32 (t,  $J=2.20$  Hz, 1H), 6.14 (d,  $J=2.20$  Hz, 2H), 3.68 (s, 7H), 2.44 (s, 3H);  $^{13}\text{C}$  NMR (100 MHz,  $\text{CDCl}_3$ )  $\delta$  161.1, 151.1, 145.5, 132.6, 129.8, 128.7, 100.9, 99.5, 55.6, 21.8; HRMS (ESI $^+$ ) calcd for  $\text{C}_{15}\text{H}_{17}\text{O}_5\text{S}$  (M) $^+$  309.0791, found 309.0781.

### Preparation of 3-(aminomethyl)benzonitrile (7e) from 3-cyanophenyl methanesulfonate

A Biotage microwave vial was charged with 3-cyanophenyl methanesulfonate (29.6 mg, 0.150 mmol),  $\text{Pd}(\text{OAc})_2$  (2.47 mg, 0.011 mmol), S-phos (11.1 mg, 0.027 mmol),  $\text{Na}_2\text{CO}_3$  (71.5 mg, 0.675 mmol), sodium phthalimidomethyltrifluoroborate **1** (56.5 mg, 0.225 mmol), 1,4-dioxane (666  $\mu\text{L}$ ), distilled water (333  $\mu\text{L}$ ). The test tube was sealed with a cap, and the reaction mixture was stirred under reflux for 48 hours before cooling to room temperature. The reaction mixture was added ethylenediamine (70.1  $\mu\text{L}$ , 1.050

mmol) and 1-propanol (666  $\mu$ L), and then the reaction mixture was stirred under reflux for 24 hours. The reaction mixture was cooled to room temperature, and then filtered, concentrated under reduced pressure. The residue was added aq. HCl (2 N) and chloroform, and then aqueous layer was washed with chloroform (x 2). Resulting aqueous layer was added aq. NaOH (2 N) and chloroform, then extracted with chloroform (x 2). Organic layers were combined and dried over magnesium sulfate, filtered, and concentrated under reduced pressure. The residue was purified by NH silica gel column chromatography (ethyl acetate/methanol = 20/1) to afford **7e** (6.94 mg, 35.0 %).

#### Preparation of 3-(aminomethyl)benzonitrile (**7e**) from 3-cyanophenyl 4-methylbenzene-1-sulfonate

A Biotage microwave vial was charged with 3-cyanophenyl 4-methylbenzene-1-sulfonate (41.0 mg, 0.150 mmol), Pd(OAc)<sub>2</sub> (2.47 mg, 0.011 mmol), S-phos (11.1 mg, 0.027 mmol), Na<sub>2</sub>CO<sub>3</sub> (71.5 mg, 0.675 mmol), sodium phthalimidomethyltrifluoroborate **1** (56.5 mg, 0.225 mmol), 1,4-dioxane (666  $\mu$ L), distilled water (333  $\mu$ L). The test tube was sealed with a cap, and the reaction mixture was stirred under reflux for 48 hours before cooling to room temperature. The reaction mixture was added ethylenediamine (70.1  $\mu$ L, 1.050 mmol) and 1-propanol (666  $\mu$ L), and then the reaction mixture was stirred under reflux for 24 hours. The reaction mixture was cooled to room temperature, and then filtered, concentrated under reduced pressure. The residue was added aq. HCl (2 N) and chloroform, and then aqueous layer was washed with chloroform (x 2). Resulting aqueous layer was added aq. NaOH (2 N) and chloroform, then extracted with chloroform (x 2). Organic layers were combined and dried over magnesium sulfate, filtered, and concentrated under reduced pressure. The residue was purified by NH silica gel column chromatography (ethyl acetate/methanol = 20/1) to afford **7e** (8.92 mg, 45.0 %).

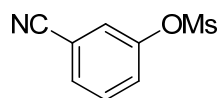

#### Preparation of 3-cyanophenyl methanesulfonate<sup>12</sup>

To a solution of 3-hydroxybenzonitrile (1.20 g, 10.1 mmol) and pyridine (3.00 mL) in dichloromethane (20.0 mL) was added methanesulfonyl chloride (1.60 mL, 20.2 mmol) at 0 °C. The reaction mixture was stirring at room temperature for 12 hours. The reaction mixture was quenched with water, and the resulting mixture was extracted with

ethyl acetate. The organic extracts were washed with brine, dried over magnesium sulfate, filtered, and concentrated under reduced pressure. The residual oil was purified by silica gel column chromatography (heptane/ethyl acetate = 2/1) to afford 3-cyanophenyl methanesulfonate (1.92 g, 97.0%).

$^1\text{H}$  NMR (400 MHz,  $\text{CDCl}_3$ )  $\delta$  7.62-7.68 (m, 1H), 7.53-7.61 (m, 3H), 3.23 (s, 3H);  $^{13}\text{C}$  NMR (100 MHz,  $\text{CDCl}_3$ )  $\delta$  149.0, 131.2, 131.2, 127.2, 125.9, 117.4, 114.3, 38.1; HRMS (EI $^+$ ) calcd for  $\text{C}_8\text{H}_7\text{NO}_3\text{S}$  (M) $^+$  197.0141, found 197.0194.

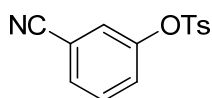

### Preparation of 3-cyanophenyl 4-methylbenzene-1-sulfonate<sup>12</sup>

To a solution of 3-hydroxybenzonitrile (1.20 g, 10.1 mmol) and pyridine (3.00 mL) in dichloromethane (20.0 mL) was added p-toluenesulfonyl chloride (3.80 g, 20.2 mmol) at 0 °C. The reaction mixture was stirring at room temperature for 12 hours. The reaction mixture was quenched with water, and the resulting mixture was extracted with ethyl acetate. The organic extracts were washed with brine, dried over magnesium sulfate, filtered, and concentrated under reduced pressure. The residual oil was purified by NH silica gel column chromatography (heptane/ethyl acetate = 4/1 to 3/1) to afford 3-cyanophenyl 4-methylbenzene-1-sulfonate (1.95 g, 70.8%).

Commercially available compound: CAS [49584-07-8]

$^1\text{H}$  NMR (400 MHz,  $\text{CDCl}_3$ )  $\delta$  7.71 (d,  $J=8.42$  Hz, 2H), 7.53-7.61 (m, 1H), 7.45 (t,  $J=7.87$  Hz, 1H), 7.36 (d,  $J=8.42$  Hz, 2H), 7.28-7.33 (m, 1H), 7.24-7.27 (m, 1H), 2.48 (s, 3H);  $^{13}\text{C}$  NMR (100 MHz,  $\text{CDCl}_3$ )  $\delta$  149.7, 146.3, 131.7, 130.9, 130.9, 130.2, 128.5, 127.5, 126.1, 117.4, 113.8, 21.9; HRMS (EI $^+$ ) calcd for  $\text{C}_{14}\text{H}_{11}\text{NO}_3\text{S}$  (M) $^+$  273.0454, found 273.0456.

### Preparation of quinolin-6-ylmethanamine from 6-chloroquinoline (7i) from quinolin-6-yl methanesulfonate

A Biotage microwave vial was charged with quinolin-6-yl methanesulfonate (33.5 mg, 0.150 mmol),  $\text{Pd}(\text{OAc})_2$  (2.47 mg, 0.011 mmol), S-phos (11.1 mg, 0.027 mmol),  $\text{Na}_2\text{CO}_3$  (71.5 mg, 0.675 mmol), sodium phthalimidomethyltrifluoroborate **1** (56.5 mg, 0.225 mmol), 1,4-dioxane (666  $\mu\text{L}$ ), distilled water (333  $\mu\text{L}$ ). The test tube was sealed with a cap, and the reaction mixture was stirred under reflux for 48 hours before cooling to room temperature. The reaction mixture was added ethylenediamine (70.1  $\mu\text{L}$ , 1.050 mmol) and 1-propanol (666  $\mu\text{L}$ ), and then the reaction mixture was stirred under reflux

for 24 hours. The reaction mixture was cooled to room temperature, and then filtered, concentrated under reduced pressure. The residue was added chloroform and water, and then extracted with chloroform (x 2). Organic layers were combined and dried over magnesium sulfate, filtered, and concentrated under reduced pressure. The residue was purified by preparative TLC (NH silica gel, ethyl acetate/methanol = 15/1) to afford **7i** (16.9 mg, 71.2 %).

**Preparation of quinolin-6-ylmethanamine from 6-chloroquinoline (7g) from quinolin-6-yl 4-methylbenzene-1-sulfonate**

A Biotage microwave vial was charged with quinolin-6-yl 4-methylbenzene-1-sulfonate (44.9 mg, 0.150 mmol), Pd(OAc)<sub>2</sub> (2.47 mg, 0.011 mmol), S-phos (11.1 mg, 0.027 mmol), Na<sub>2</sub>CO<sub>3</sub> (71.5 mg, 0.675 mmol), sodium phthalimidomethyltrifluoroborate **1** (56.5 mg, 0.225 mmol), 1,4-dioxane (666 µL), distilled water (333 µL). The test tube was sealed with a cap, and the reaction mixture was stirred under reflux for 48 hours before cooling to room temperature. The reaction mixture was added ethylenediamine (70.1 µL, 1.050 mmol) and 1-propanol (666 µL), and then the reaction mixture was stirred under reflux for 24 hours. The reaction mixture was cooled to room temperature, and then filtered, concentrated under reduced pressure. The residue was added chloroform and water, and then extracted with chloroform (x 2). Organic layers were combined and dried over magnesium sulfate, filtered, and concentrated under reduced pressure. The residue was purified by preparative TLC (NH silica gel, ethyl acetate/methanol = 15/1) to afford **7i** (17.2 mg, 72.5 %).

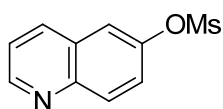

**Preparation of quinolin-6-yl methanesulfonate<sup>13</sup>**

To a solution of quinolin-6-ol (1.00 g, 6.89 mmol) and pyridine (2.00 mL) in dichloromethane (20.0 mL) was added methanesulfonyl chloride (1.10 mL, 13.8 mmol) at 0 °C. The reaction mixture was stirring at room temperature for 12 hours. The reaction mixture was quenched with water, and the resulting mixture was extracted with ethyl acetate. The organic extracts were washed with brine, dried over magnesium sulfate, filtered, and concentrated under reduced pressure. The residual oil was purified by silica gel column chromatography (heptane/ethyl acetate = 2/3 to 1/2) to afford quinolin-6-yl methanesulfonate (1.20 g, 65.0%).

<sup>1</sup>H NMR (400 MHz, CDCl<sub>3</sub>) δ 8.96 (dd, *J*=1.65, 4.21 Hz, 1H), 8.14-8.21 (m, 2H), 7.78

(d,  $J=2.56$  Hz, 1H), 7.63 (dd,  $J=2.56$ , 9.15 Hz, 1H), 7.47 (dd,  $J=4.21$ , 8.23 Hz, 1H), 3.23 (s, 3H);  $^{13}\text{C}$  NMR (100 MHz,  $\text{CDCl}_3$ )  $\delta$  151.2, 146.8, 146.8, 136.1, 132.1, 128.6, 124.4, 122.2, 119.5, 37.8; HRMS (EI $^+$ ) calcd for  $\text{C}_{10}\text{H}_9\text{NO}_3\text{S}$  ( $\text{M}$ ) $^+$  223.0298, found 223.0342.

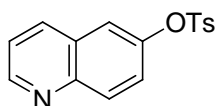

#### Preparation of quinolin-6-yl 4-methylbenzene-1-sulfonate<sup>14</sup>

To a solution of quinolin-6-ol (1.00 g, 6.89 mmol) and pyridine (2.00 mL) in dichloromethane (20.0 mL) was added p-toluenesulfonyl chloride (2.60 g, 13.8 mmol) at 0 °C. The reaction mixture was stirring at room temperature for 12 hours. The reaction mixture was quenched with water, and the resulting mixture was extracted with ethyl acetate. The organic extracts were washed with brine, dried over magnesium sulfate, filtered, and concentrated under reduced pressure. The residual oil was purified by NH silica gel column chromatography (heptane/ethyl acetate = 3/2 to 1/1) to afford quinolin-6-yl 4-methylbenzene-1-sulfonate (1.73 g, 84.0%).

Commercially available compound: CAS [426265-40-9]

$^1\text{H}$  NMR (400 MHz,  $\text{CDCl}_3$ )  $\delta$  8.92 (dd,  $J=1.65$ , 4.21 Hz, 1H), 8.09 (dd,  $J=1.10$ , 8.42 Hz, 1H), 8.01 (d,  $J=9.15$  Hz, 1H), 7.73 (d,  $J=8.42$  Hz, 2H), 7.55 (d,  $J=2.56$  Hz, 1H), 7.42 (dd,  $J=4.21$ , 8.23 Hz, 1H), 7.22-7.34 (m, 3H), 2.44 (s, 3H);  $^{13}\text{C}$  NMR (100 MHz,  $\text{CDCl}_3$ )  $\delta$  151.0, 147.3, 146.7, 145.8, 136.1, 132.2, 131.5, 130.0, 128.6, 128.4, 124.7, 122.0, 120.1, 21.8; HRMS (ESI $^+$ ) calcd for  $\text{C}_{16}\text{H}_{14}\text{NO}_3\text{S}$  ( $\text{M}$ ) $^+$  300.0689, found 300.0680.

#### Preparation of (2-methyl-1,3-benzothiazol-5-yl)methanamine (7k) from 2-methyl-1,3-benzothiazol-5-yl methanesulfonate

A Biotage microwave vial was charged with 2-methyl-1,3-benzothiazol-5-yl methanesulfonate (36.5 mg, 0.150 mmol),  $\text{Pd}(\text{OAc})_2$  (2.47 mg, 0.011 mmol), S-phos (11.1 mg, 0.027 mmol),  $\text{Na}_2\text{CO}_3$  (71.5 mg, 0.675 mmol), sodium phthalimidomethyltrifluoroborate **1** (56.5 mg, 0.225 mmol), 1,4-dioxane (666  $\mu\text{L}$ ), distilled water (333  $\mu\text{L}$ ). The test tube was sealed with a cap, and the reaction mixture was stirred under reflux for 48 hours before cooling to room temperature. The reaction mixture was added ethylenediamine (70.1  $\mu\text{L}$ , 1.050 mmol) and 1-propanol (666  $\mu\text{L}$ ), and then the reaction mixture was stirred under reflux for 24 hours. The reaction mixture was cooled to room temperature, and then filtered, concentrated under reduced

pressure. The residue was added chloroform and water, and then extracted with chloroform (x 2). Organic layers were combined and dried over magnesium sulfate, filtered, and concentrated under reduced pressure. The residue was purified by preparative TLC (NH silica gel, ethyl acetate/methanol = 15/1) to afford **7k** (18.7 mg, 69.9 %).

**Preparation of (2-methyl-1,3-benzothiazol-5-yl)methanamine (7h) from 2-methyl-1,3-benzothiazol-5-yl 4-methylbenzene-1-sulfonate**

A Biotage microwave vial was charged with 2-methyl-1,3-benzothiazol-5-yl 4-methylbenzene-1-sulfonate (47.9 mg, 0.150 mmol), Pd(OAc)<sub>2</sub> (2.47 mg, 0.011 mmol), S-phos (11.1 mg, 0.027 mmol), Na<sub>2</sub>CO<sub>3</sub> (71.5 mg, 0.675 mmol), sodium phthalimidomethyltrifluoroborate **1** (56.5 mg, 0.225 mmol), 1,4-dioxane (666  $\mu$ L), distilled water (333  $\mu$ L). The test tube was sealed with a cap, and the reaction mixture was stirred under reflux for 48 hours before cooling to room temperature. The reaction mixture was added ethylenediamine (70.1  $\mu$ L, 1.050 mmol) and 1-propanol (666  $\mu$ L), and then the reaction mixture was stirred under reflux for 24 hours. The reaction mixture was cooled to room temperature, and then filtered, concentrated under reduced pressure. The residue was added chloroform and water, and then extracted with chloroform (x 2). Organic layers were combined and dried over magnesium sulfate, filtered, and concentrated under reduced pressure. The residue was purified by preparative TLC (NH silica gel, ethyl acetate/methanol = 15/1) to afford **7k** (20.0 mg, 74.9 %).

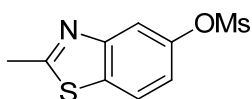

**Preparation of 2-methyl-1,3-benzothiazol-5-yl methanesulfonate<sup>13</sup>**

To a solution of 2-methyl-1,3-benzothiazol-5-ol (1.50 g, 10.0 mmol) and pyridine (3.00 mL) in dichloromethane (20.0 mL) was added methanesulfonyl chloride (1.60 mL, 20.0 mmol) at 0 °C. The reaction mixture was stirring at room temperature for 12 hours. The reaction mixture was quenched with water, and the resulting mixture was extracted with ethyl acetate. The organic extracts were washed with brine, dried over magnesium sulfate, filtered, and concentrated under reduced pressure. The residual oil was purified by NH silica gel column chromatography (heptane/ethyl acetate = 2/1 to 1/1) to afford 2-methyl-1,3-benzothiazol-5-yl methanesulfonate (2.14 g, 88.1%).

<sup>1</sup>H NMR (400 MHz, CDCl<sub>3</sub>)  $\delta$  7.74-7.94 (m, 2H), 7.33 (dd, *J*=2.20, 8.78 Hz, 1H), 3.19

(s, 3H), 2.85 (s, 3H);  $^{13}\text{C}$  NMR (100 MHz,  $\text{CDCl}_3$ )  $\delta$  170.0, 154.1, 147.7, 134.7, 122.4, 119.3, 115.8, 37.4, 20.4; HRMS (EI+) calcd for  $\text{C}_9\text{H}_9\text{NO}_3\text{S}_2$  ( $\text{M}$ ) $^+$  243.0018, found 243.0034

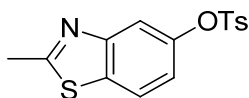

#### Preparation of 2-methyl-1,3-benzothiazol-5-yl 4-methylbenzene-1-sulfonate<sup>15</sup>

To a solution of 2-methyl-1,3-benzothiazol-5-ol (1.20 g, 8.00 mmol) and pyridine (3.00 mL) in dichloromethane (20.0 mL) was added p-toluenesulfonyl chloride (3.10 g, 16.0 mmol) at 0 °C. The reaction mixture was stirring at room temperature for 12 hours. The reaction mixture was quenched with water, and the resulting mixture was extracted with ethyl acetate. The organic extracts were washed with brine, dried over magnesium sulfate, filtered, and concentrated under reduced pressure. The residual oil was purified by NH silica gel column chromatography (heptane/ethyl acetate = 4/1 to 2/1) to afford 2-methyl-1,3-benzothiazol-5-yl 4-methylbenzene-1-sulfonate (1.64 g, 64.3%).

$^1\text{H}$  NMR (400 MHz,  $\text{CDCl}_3$ )  $\delta$  7.66-7.80 (m, 3H), 7.45 (d,  $J$ =2.56 Hz, 1H), 7.30 (d,  $J$ =8.42 Hz, 2H), 7.11 (dd,  $J$ =2.38, 8.60 Hz, 1H), 2.81 (s, 3H), 2.44 (s, 3H);  $^{13}\text{C}$  NMR (100 MHz,  $\text{CDCl}_3$ )  $\delta$  169.6, 153.8, 148.2, 145.6, 134.4, 132.2, 130.0, 128.6, 122.0, 119.9, 116.1, 21.9, 20.4; HRMS (ESI+) calcd for  $\text{C}_{15}\text{H}_{14}\text{NO}_3\text{S}_2$  ( $\text{M}$ ) $^+$  320.0410, found 320.0400.

## 6.Experimental procedure for preparing compounds 9 and 11

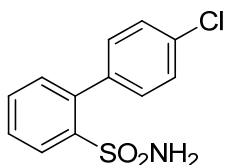

#### Preparation of 2-(4-chlorophenyl)benzene-1-sulfonamide (9)<sup>16</sup>

To a solution of 2-bromobenzene-1-sulfonamide (94.4 mg, 0.40 mmol),  $\text{Pd}(\text{Pt-Bu}_3)_2$  (10.2 mg, 0.02 mmol), 4-chlorobenzene boronic acid (187.6 mg, 1.20 mmol),  $\text{Cs}_2\text{CO}_3$  (260.8 mg, 0.80 mmol), 1,4-dioxane (4.00 mL), and distilled water (2.0 mL) was stirred under reflux for 15 h before cooling to room temperature. The reaction mixture was quenched with water, and the resulting mixture was extracted with ethyl acetate. The organic extracts were washed with brine, dried over magnesium sulfate, filtered, and concentrated under reduced pressure. The residual oil was purified by silica gel column

chromatography (heptane/ethyl acetate = 2/1 to 1/1) to afford 2-(4-chlorophenyl)benzene-1-sulfonamide (212 mg).

$^1\text{H}$  NMR (400 MHz, DMSO-*d*<sub>6</sub>)  $\delta$  8.02 (dd,  $J$ =1.46, 7.68 Hz, 1H), 7.54-7.64 (m, 2H), 7.40-7.47 (m, 2H), 7.35-7.40 (m, 2H), 7.28-7.33 (m, 3H);  $^{13}\text{C}$  NMR (100 MHz, DMSO-*d*<sub>6</sub>)  $\delta$  142.3, 138.8, 138.6, 132.3, 131.6, 131.1, 131.1, 128.0, 127.6, 127.3; HRMS (EI<sup>+</sup>) calcd for C<sub>12</sub>H<sub>10</sub>ClNO<sub>2</sub>S (M+NH<sub>4</sub>)<sup>+</sup> 267.0115, found 267.0112.

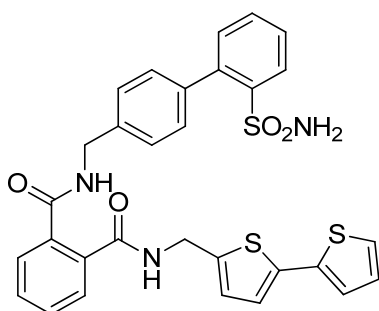

## Preparation

of

### 1-N-([4-(2-sulfamoylphenyl)phenyl]methyl)-2-N-([5-(thiophen-2-yl)thiophen-2-yl]methyl)benzene-1,2-dicarboxamide (**11**)<sup>10</sup>

A Biotage microwave vial was charged with 2-(4-chlorophenyl)benzene-1-sulfonamide (20.6 mg, 0.077 mmol), Pd(OAc)<sub>2</sub> (0.86 mg, 0.004 mmol), S-phos (3.78 mg, 0.009 mmol), Na<sub>2</sub>CO<sub>3</sub> (36.7 mg, 0.347 mmol), sodium phthalimidomethyltrifluoroborate **1** (29.0 mg, 0.116 mmol), 1,4-dioxane (444  $\mu\text{L}$ ), distilled water (222  $\mu\text{L}$ ). The test tube was sealed with a cap, and the reaction mixture was stirred under reflux for 48 hours before cooling to room temperature. The reaction mixture was added water and chloroform, and then aqueous layer was washed with chloroform (x 2). Resulting aqueous layer was added 1N-HCl aq. and chloroform, and then extracted with chloroform/tetrahydrofuran = 5/1 (x 3). Organic layers were combined and washed with brine, dried over magnesium sulfate, filtered, and concentrated under reduced pressure. The crude mixture was used in the next step without further purification.

The crude mixture was added **7j** (18.0 mg, 0.092 mmol), EDC•HCl (22.2 mg, 0.116 mmol), HOBt•H<sub>2</sub>O (17.5 mg, 0.116 mmol), *i*-Pr<sub>2</sub>NEt (26.8  $\mu\text{L}$ , 0.154 mmol), and tetrahydrofuran (2.0 mL). The reaction mixture was stirred at room temperature for 10 h. The reaction mixture was quenched with water, and the resulting mixture was extracted with ethyl acetate/tetrahydrofuran (x 2). The organic layers were combined and washed with brine, dried over magnesium sulfate, filtered, and concentrated under reduced pressure. The residue was purified by preparative TLC (NH silica gel, ethyl

acetate/methanol = 10/1) to afford **11** (24.0 mg, 53.1 %).

$^1\text{H}$  NMR (400 MHz, DMSO- $d_6$ )  $\delta$  8.97 (t,  $J=5.86$  Hz, 1H), 8.86 (t,  $J=5.86$  Hz, 1H), 7.99-8.05 (m, 1H), 7.48-7.60 (m, 6H), 7.45 (d,  $J=5.12$  Hz, 1H), 7.33-7.39 (m, 4H), 7.25-7.30 (m, 1H), 7.21 (d,  $J=3.66$  Hz, 1H), 7.16 (br. s., 2H), 7.11 (d,  $J=3.66$  Hz, 1H), 7.04 (dd,  $J=3.84$ , 4.94 Hz, 1H), 7.00 (d,  $J=3.66$  Hz, 1H), 4.53 (d,  $J=5.49$  Hz, 2H), 4.47 (d,  $J=6.22$  Hz, 2H);  $^{13}\text{C}$  NMR (100 MHz, DMSO- $d_6$ )  $\delta$  168.1, 168.1, 142.2, 141.9, 139.8, 138.5, 138.4, 136.7, 136.4, 135.9, 135.4, 132.5, 131.4, 129.6, 129.4, 129.1, 129.1, 128.3, 127.7, 127.5, 127.3, 126.4, 126.4, 125.1, 123.6, 123.4, 42.2, 37.9; HRMS (ESI+) calcd for  $\text{C}_{30}\text{H}_{26}\text{N}_3\text{O}_4\text{S}$  ( $\text{M}+\text{NH}_4$ ) $^+$  605.1340, found 605.1345.

## References

- (1) Murai, N.; Yonaga, M.; Tanaka, K. *Org. Lett.* **2012**, *14*, 1278.
- (2) Martínez-Asencio, A.; Ramón, D. J.; Yus, M. *Tetrahedron*. **2011**, *67*, 3140.
- (3) Leonard, N. J.; Swaringn, Jr. R. A. *J. Org. Chem.* **1969**, *34*, 3814.
- (4) Lamb, G. W.; Watson, A. J. A.; Jolley, K. E.; Maxwell, A. C. Williams, J. M. J. *Tetrahedron Lett.* **2009**, *50*, 3374.
- (5) Jeffs, P. W. Hansen, J. F. Brine, G. A. *J. Org. Chem.* **1975**, *40*, 2883.
- (6) Bookser, B. C.; Bruice, T. C. *J. Am. Chem. Soc.* **1991**, *113*, 4208.
- (7) Bartoli, G.; Antonio, G. D.; Giovannini, R.; Giuli, S.; Lanari, S.; Paoletti, M.; Marcantoni, E. *J. Org. Chem.* **2008**, *73*, 1919.
- (8) Goodyer, C. L. M.; Chinje, E. C.; Jaffar, M.; Stratford, I. J.; Threadgill, M. D. *Bioorg. Med. Chem.* **2003**, *11*, 4189.
- (9) Zhao, Q.; Liu, S.; Li, Y.; Wang, Q. *J. Agric. Food, Chem.* **2009**, *57*, 2849.
- (10) Shao, P. P.; Ok, D.; Fisher, M. H.; Garcia, M. L.; Kaczorowski, G. J.; Li, C.; Lyons, K. A.; Martin, W. J.; Meinke, P. T.; Priest, B. T.; Smith, M. M.; Wyvratt, M. J.; Ye, F.; Parsons, W. H. *Bioorg. Med. Chem. Lett.* **2005**, *15*, 1901.
- (11) Ackermann, L.; Althammer, A.; Fenner, S. *Angew. Chem., Int. Ed.* **2009**, *48*, 201.
- (12) Chow, W. K.; So, C. M. Lau, C. P. Kwong, F. Y. *Chem. Eur. J.* **2011**, *17*, 6913.
- (13) Molander, G. A.; Shin, I. *Org. Lett.* **2011**, *13*, 3956.
- (14) Ogata, T.; Hartwig, J. F. *J. Am. Chem. Soc.* **2008**, *130*, 13848.
- (15) Nguyen, H. N.; Huang, X.; Buchwald, S. L. *J. Am. Chem. Soc.* **2003**, *125*, 11818.
- (16) Iwama, S.; Tanaka, T.; Gotoh, N. PCT Int. WO 2011145669 A1, 2011.

## 7. Spectra for Compounds

|                        |                     |                      |                     |                      |             |                  |         |
|------------------------|---------------------|----------------------|---------------------|----------------------|-------------|------------------|---------|
| Acquisition Time (sec) | 2.7320              | Comment              | STANDARD 1H OBSERVE | Date                 | Feb 26 2012 | Frequency (MHz)  | 399.93  |
| Date Stamp             | Feb 26 2012         | File Name            | C:\USRR\NMR\FID     | Points Count         | 16384       | Pulse Sequence   | s2pul   |
| Nucleus                | 1H                  | Number of Transients | 32                  | Spectrum Type        | STANDARD    | Sweep Width (Hz) | 5995.20 |
| Receiver Gain          | 20.00               | Solvent              | DMSO-d6             | Spectrum Offset (Hz) | 2247.6611   |                  |         |
| Temperature (degree C) | AMBIENT TEMPERATURE |                      |                     |                      |             |                  |         |

<sup>1</sup>H NMR (400 MHz, DMSO-d<sub>6</sub>) δ 7.72 (s, 4H), 2.56 (q, *J*=5.12 Hz, 2H)

VerticalScaleFactor = 1

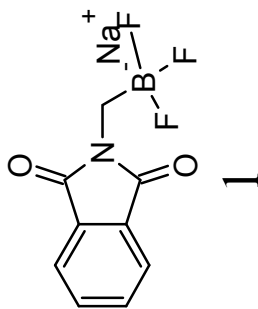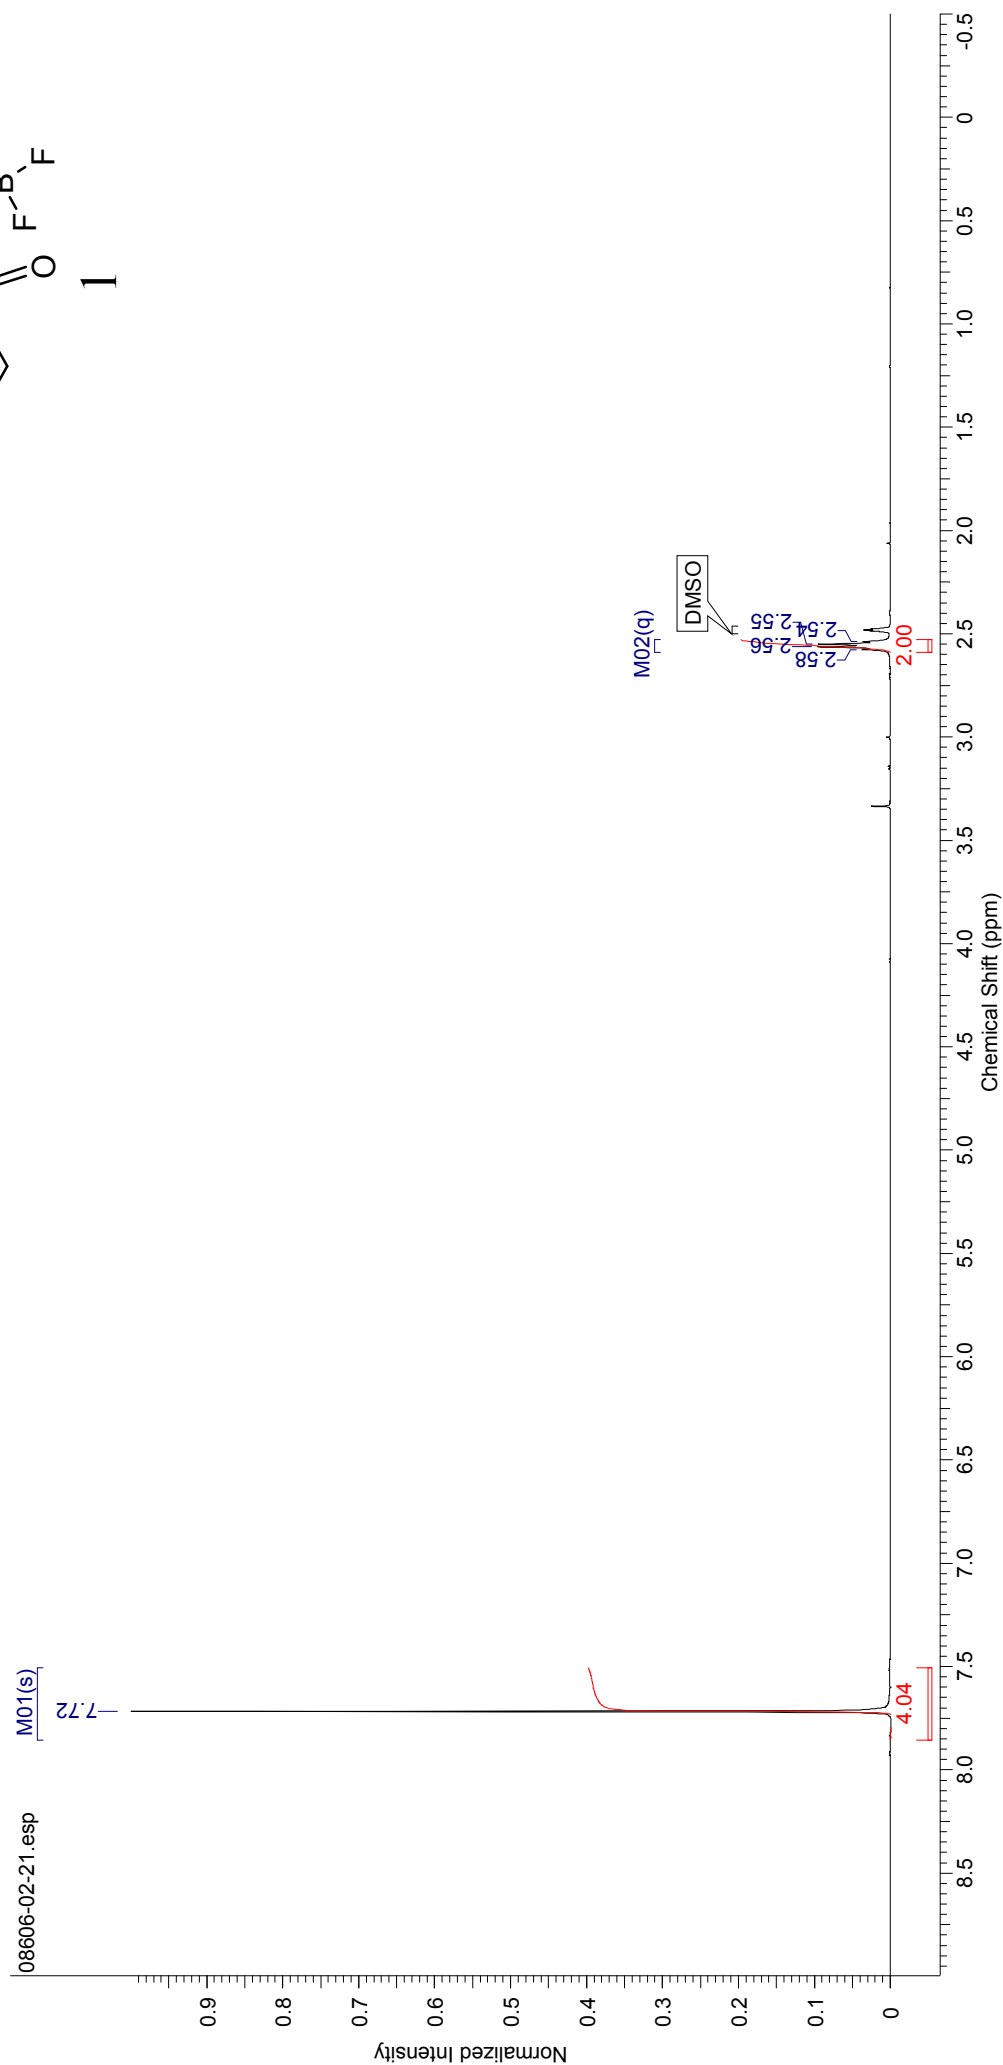

13C OBSERVE

Pulse Sequence: s2pul

Solvent: DMSO

Ambient temperature

Mercury-400BH "6fback"

Relax. delay 1.801 sec

Pulse 37.5 degrees

Acq. time 1.199 sec

Width 25000.0 Hz

288 repetitions

OBSERVE C13, 100.5611422 MHz

DECOUPLE H1, 399.9264685 MHz

Power 34 dB

continuously on

WALTZ-16 modulated

DATA PROCESSING

Line broadening 1.0 Hz

FT size 65536

Total time 1 hr, 51 min, 37 sec

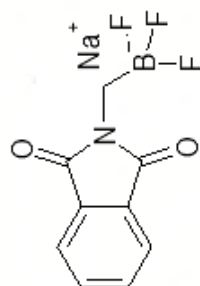

1

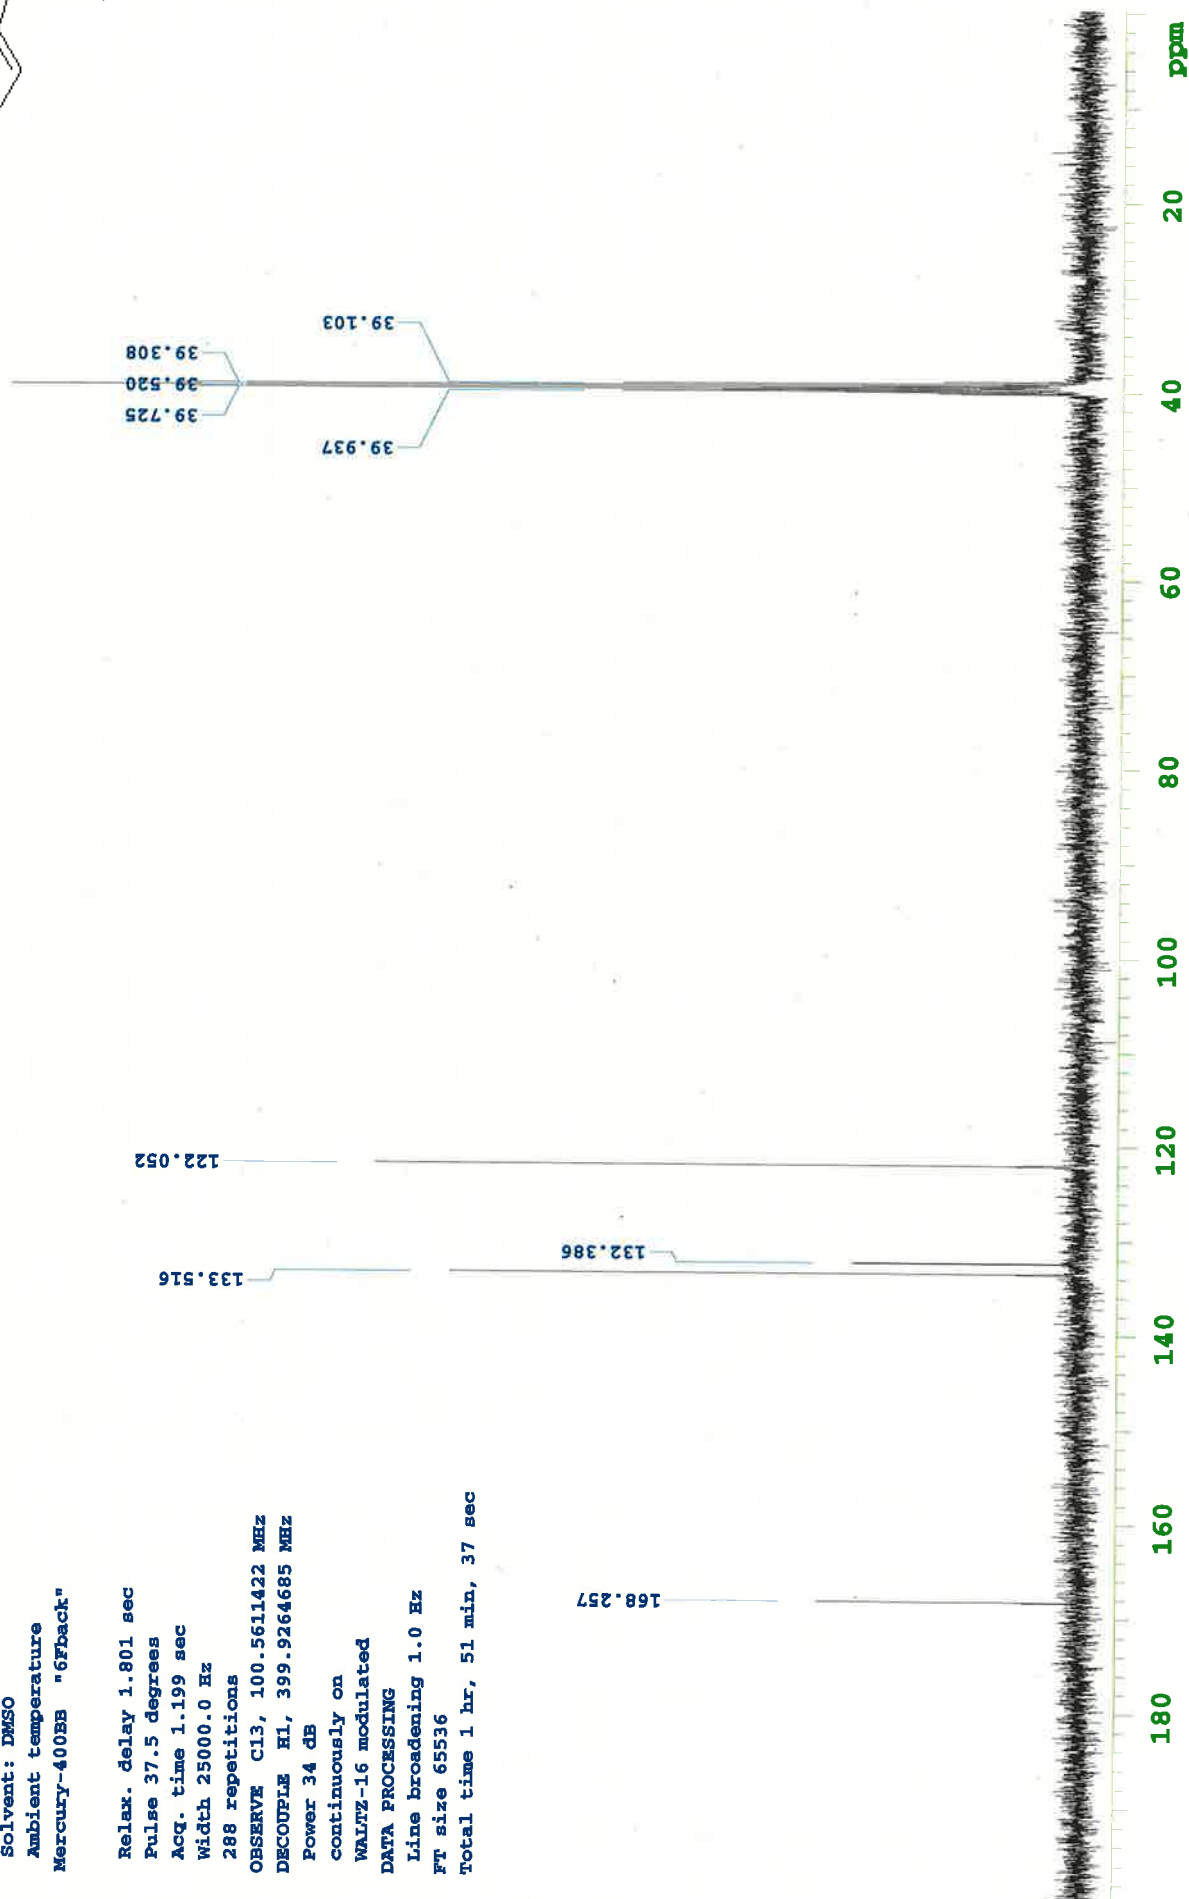

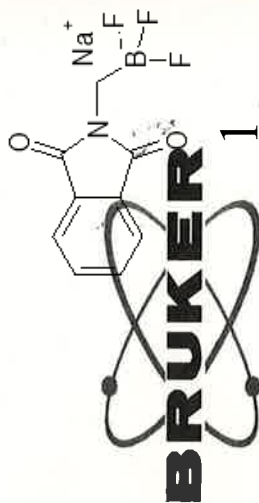

Current Data Parameters  
NAME C09393 KT-1  
EXPNO 6  
PROCNO 1

F2 - Acquisition Parameters  
Date\_ 20051224  
Time\_ 9.26

INSTRUM spect  
PROBHD 5 mm PAXO 19F  
PULPROG zgpg30  
TD 131072  
SOLVENT DMSO

NS 128  
DS 4  
SWH 75187.965 Hz  
FIDRES 0.37353 Hz  
AQ 0.0714096 sec  
RG 327.5

DW 6.650 usec  
DE 6.00 usec  
TE 303.0 K  
D1 1.0000000 sec  
d11 0.0000000 sec  
d12 0.0000000 sec  
TD0 1

===== CHANNEL f1 =====  
NUC1 19F  
P1 11.50 usec  
PL1 0.00 dB  
SFO1 376.4607160 MHz

===== CHANNEL f2 =====  
CPDPRG2 waltz16  
NUC2 1H  
P2 80.00 usec  
PL2 17.50 dB  
PL12 -0.70 dB  
SFO2 400.1316000 MHz

F2 - Processing parameters  
SI 32768  
SF 376.500841 MHz  
WDW EM  
SSB 0  
LB 1.00 Hz  
GB 0  
PC 1.00

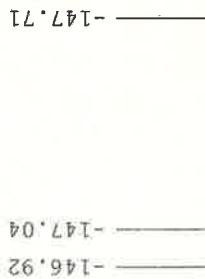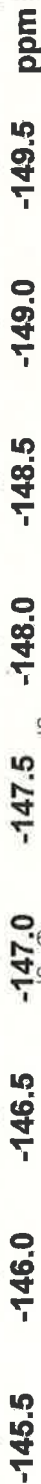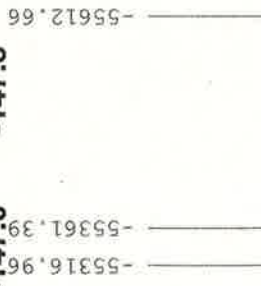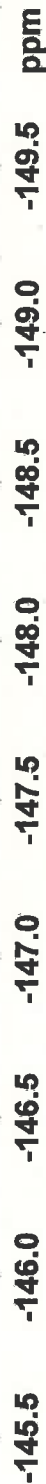

C09393 KT-107926-09X224 DMSO 11B-NMR(aring) DE=10000us BBO

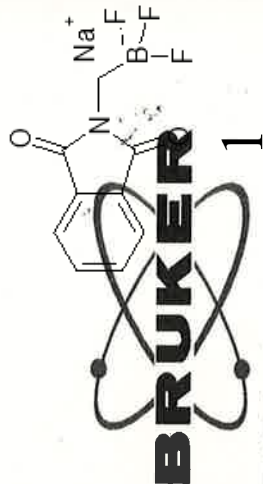

3.23  
2.87

Current Data Parameters  
NAME C09393 KT-1  
EXPNO 15  
PROCNO 1  
F2 - Acquisition Parameters  
Date\_ 20091225  
Time 15:53  
INSTRUM spect  
PROBHD 5 mm PABBO BB-  
PULPROG aing  
TD 2192  
FIDRES 0.192  
AQ 0.050  
RG 320  
DE 1000.00 usec  
TE 303.2 K  
D1 2.00000000 sec  
d13 0.00000000 sec  
TD0 1  
===== CHANNEL f1 =====  
NUC1 11B  
P1 10.40 usec  
PL1 -0.50 dB  
SFO1 126.375371 MHz  
F2 - Processing Parameters 4096  
SI  
SF 126.375381 MHz  
WDW EM  
SSS 0  
GB 1.00 Hz  
CB 0  
PC 1.40

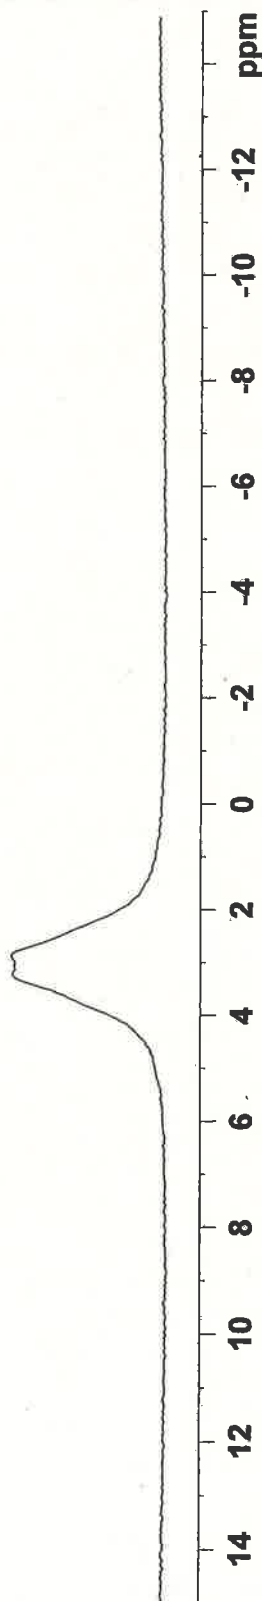

415.13  
368.96

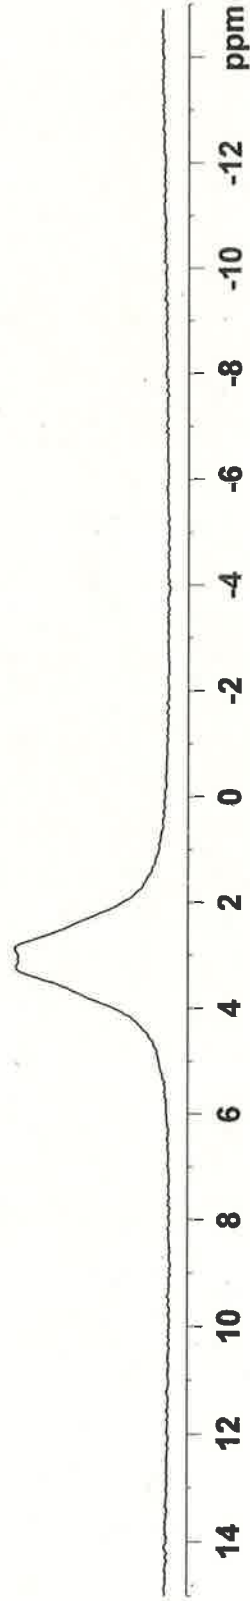

|         |                                                  |    |          |
|---------|--------------------------------------------------|----|----------|
| Formula | C <sub>2</sub> H <sub>14</sub> BBrO <sub>2</sub> | FW | 220.8999 |
|---------|--------------------------------------------------|----|----------|

|                        |                |               |                     |                        |                     |                      |             |
|------------------------|----------------|---------------|---------------------|------------------------|---------------------|----------------------|-------------|
| Acquisition Time (sec) | 2.7320         | Comment       | STANDARD 1H OBSERVE | Date                   | Oct 23 2011         | Date Stamp           | Oct 23 2011 |
| File Name              | C:\USR\NMR\FID |               |                     | Nucleus                | 1H                  | Number of Transients | 32          |
| Original Points Count  | 16379          | Points Count  | 16384               | Solvent                | CHLOROFORM-d        |                      |             |
| Spectrum Offset (Hz)   | 2247.6414      | Spectrum Type | STANDARD            | Temperature (degree C) | AMBIENT TEMPERATURE |                      |             |

<sup>1</sup>H NMR (400 MHz, CHLOROFORM-d) δ 2.57 (s, 2H), 1.27 (s, 12H)

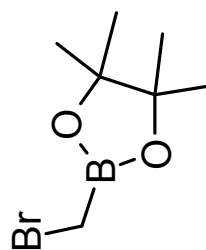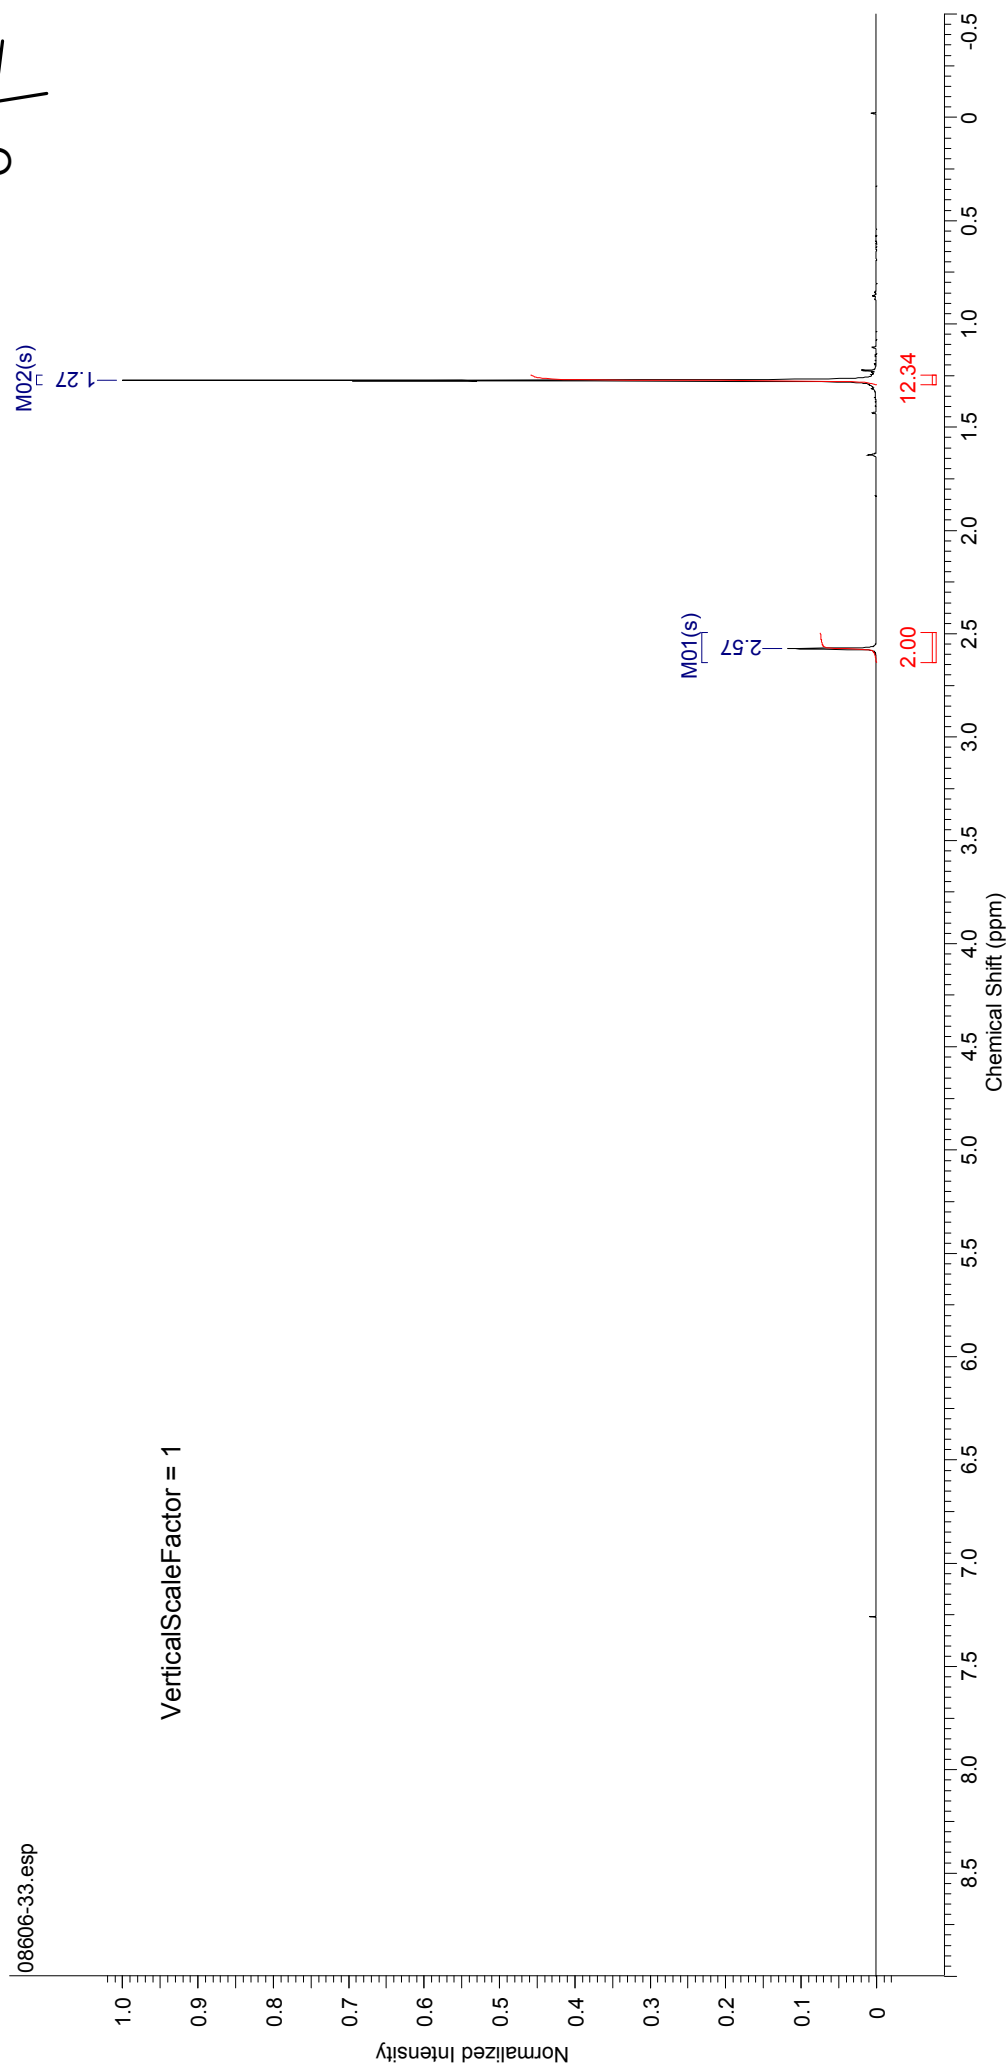

13C OBSERVE

Pulse Sequence: s2pul

Solvent: CDCl3

Ambient temperature

File: 08606-33

Mercury-400HB "6Fback"

Relax. delay 1.801 sec

Pulse 37.5 degrees

Acq. time 1.199 sec

Width 25000.0 Hz

768 repetitions

OBSERVE C13, 100.5606087 MHz

DECOUPLE H1, 399.9245689 MHz

Power 34 dB

continuously on

WALTZ-16 modulated

DATA PROCESSING

Line broadening 1.0 Hz

FT size 65536

Total time 3 hr, 34 min, 58 sec

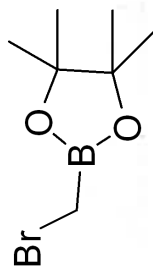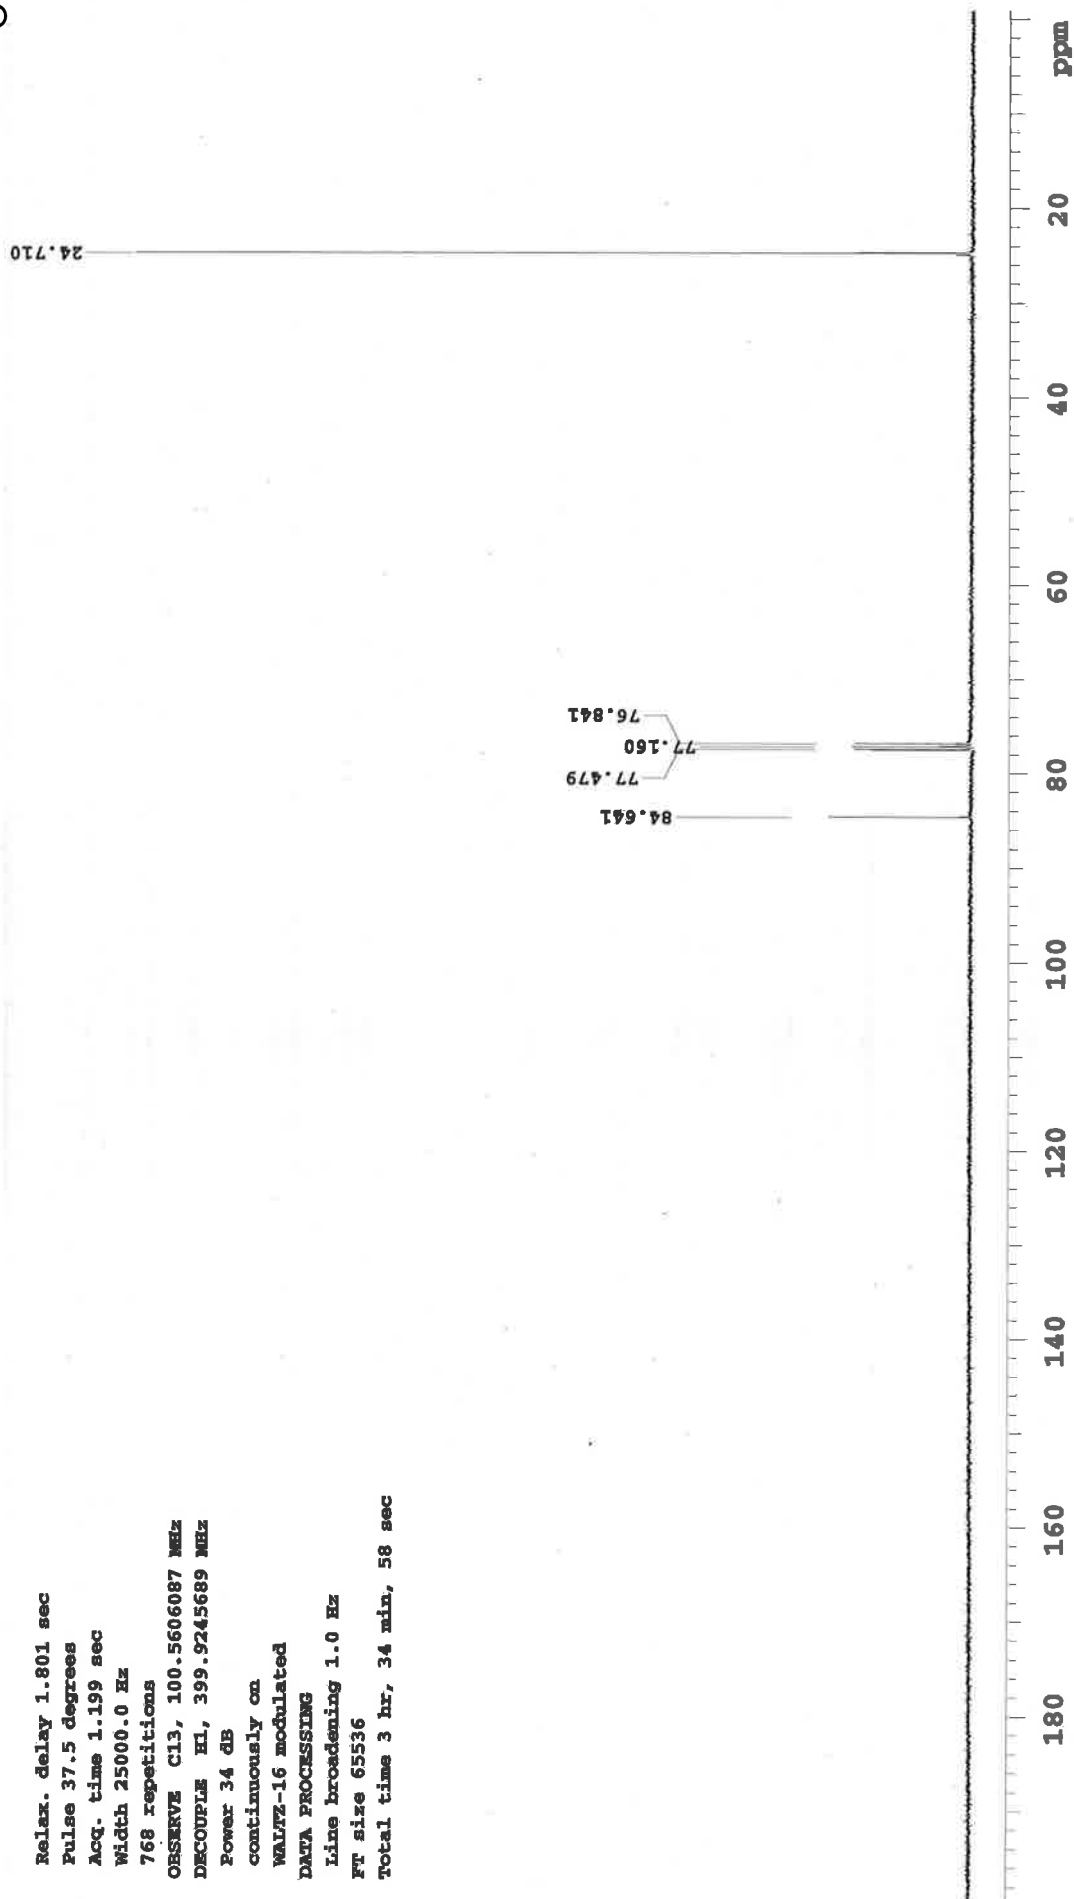

|         |                                                 |    |          |
|---------|-------------------------------------------------|----|----------|
| Formula | C <sub>17</sub> H <sub>17</sub> NO <sub>4</sub> | FW | 299.3212 |
|---------|-------------------------------------------------|----|----------|

|                        |                     |                      |                     |                       |                 |                |          |                  |         |
|------------------------|---------------------|----------------------|---------------------|-----------------------|-----------------|----------------|----------|------------------|---------|
| Acquisition Time (sec) | 2.7320              | Comment              | STANDARD 1H OBSERVE | Date                  | Feb. 25 2012    |                |          |                  |         |
| Date Stamp             | Feb 25 2012         |                      | File Name           | C:\USR\NMR\FID        | Frequency (MHz) | 399.93         |          |                  |         |
| Nucleus                | 1H                  | Number of Transients | 32                  | Original Points Count | 16379           | Pulse Sequence | s2pul    |                  |         |
| Receiver Gain          | 16.00               | Solvent              | DMSO-d6             | Spectrum Offset (Hz)  | 2247.6611       | Spectrum Type  | STANDARD | Sweep Width (Hz) | 5995.20 |
| Temperature (degree C) | AMBIENT TEMPERATURE |                      |                     |                       |                 |                |          |                  |         |

<sup>1</sup>H NMR (400 MHz, DMSO-d<sub>6</sub>) δ 12.93 (br. s., 1H), 8.63 (t, *J*=5.49 Hz, 1H), 7.74 (d, *J*=7.68 Hz, 1H), 7.36-7.62 (m, 3H), 7.25 (d, *J*=8.42 Hz, 1H), 6.61-6.79 (m, 2H), 4.31 (d, *J*=5.86 Hz, 2H), 3.70 (s, 3H), 2.28 (s, 3H)

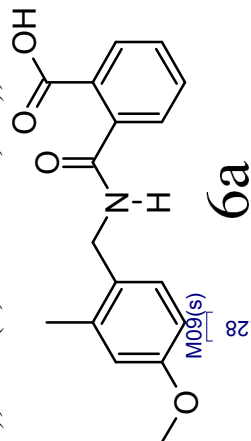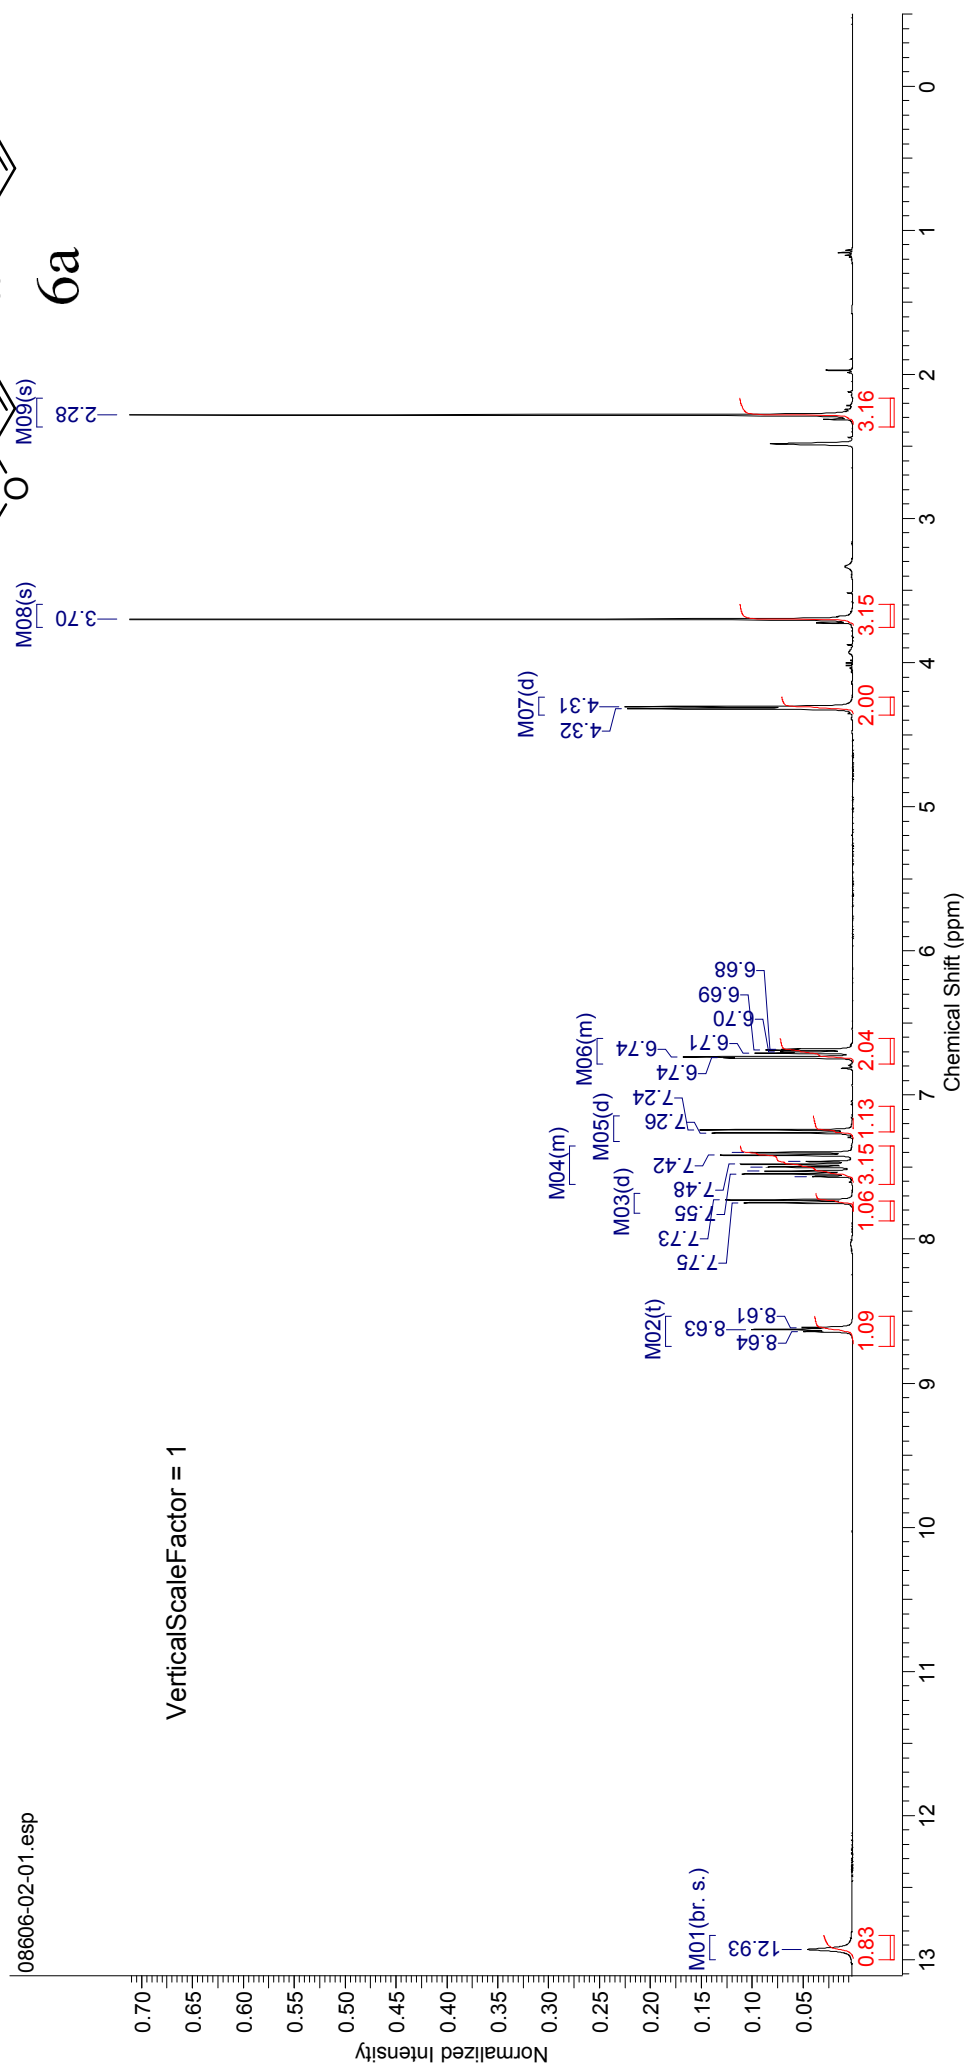

13C OBSERVE

Pulse Sequence: s2pul

Solvent: DMSO

Ambient temperature

File: 08606-02-01

Mercury-400BB "6Fback"

Relax. delay 1.801 sec

Pulse 37.5 degrees

Acq. time 1.199 sec

Width 25000.0 Hz

800 repetitions

OBSERVE C13, 100.5611422 MHz

DECOUPLE H1, 399.9264685 MHz

Power 34 dB

continuously on

WALTZ-16 modulated

DATA PROCESSING

Line broadening 1.0 Hz

FT size 65536

Total time 1 hr, 47 min, 35 sec

6a

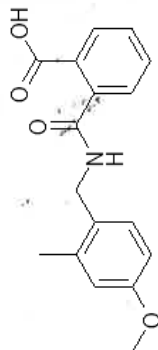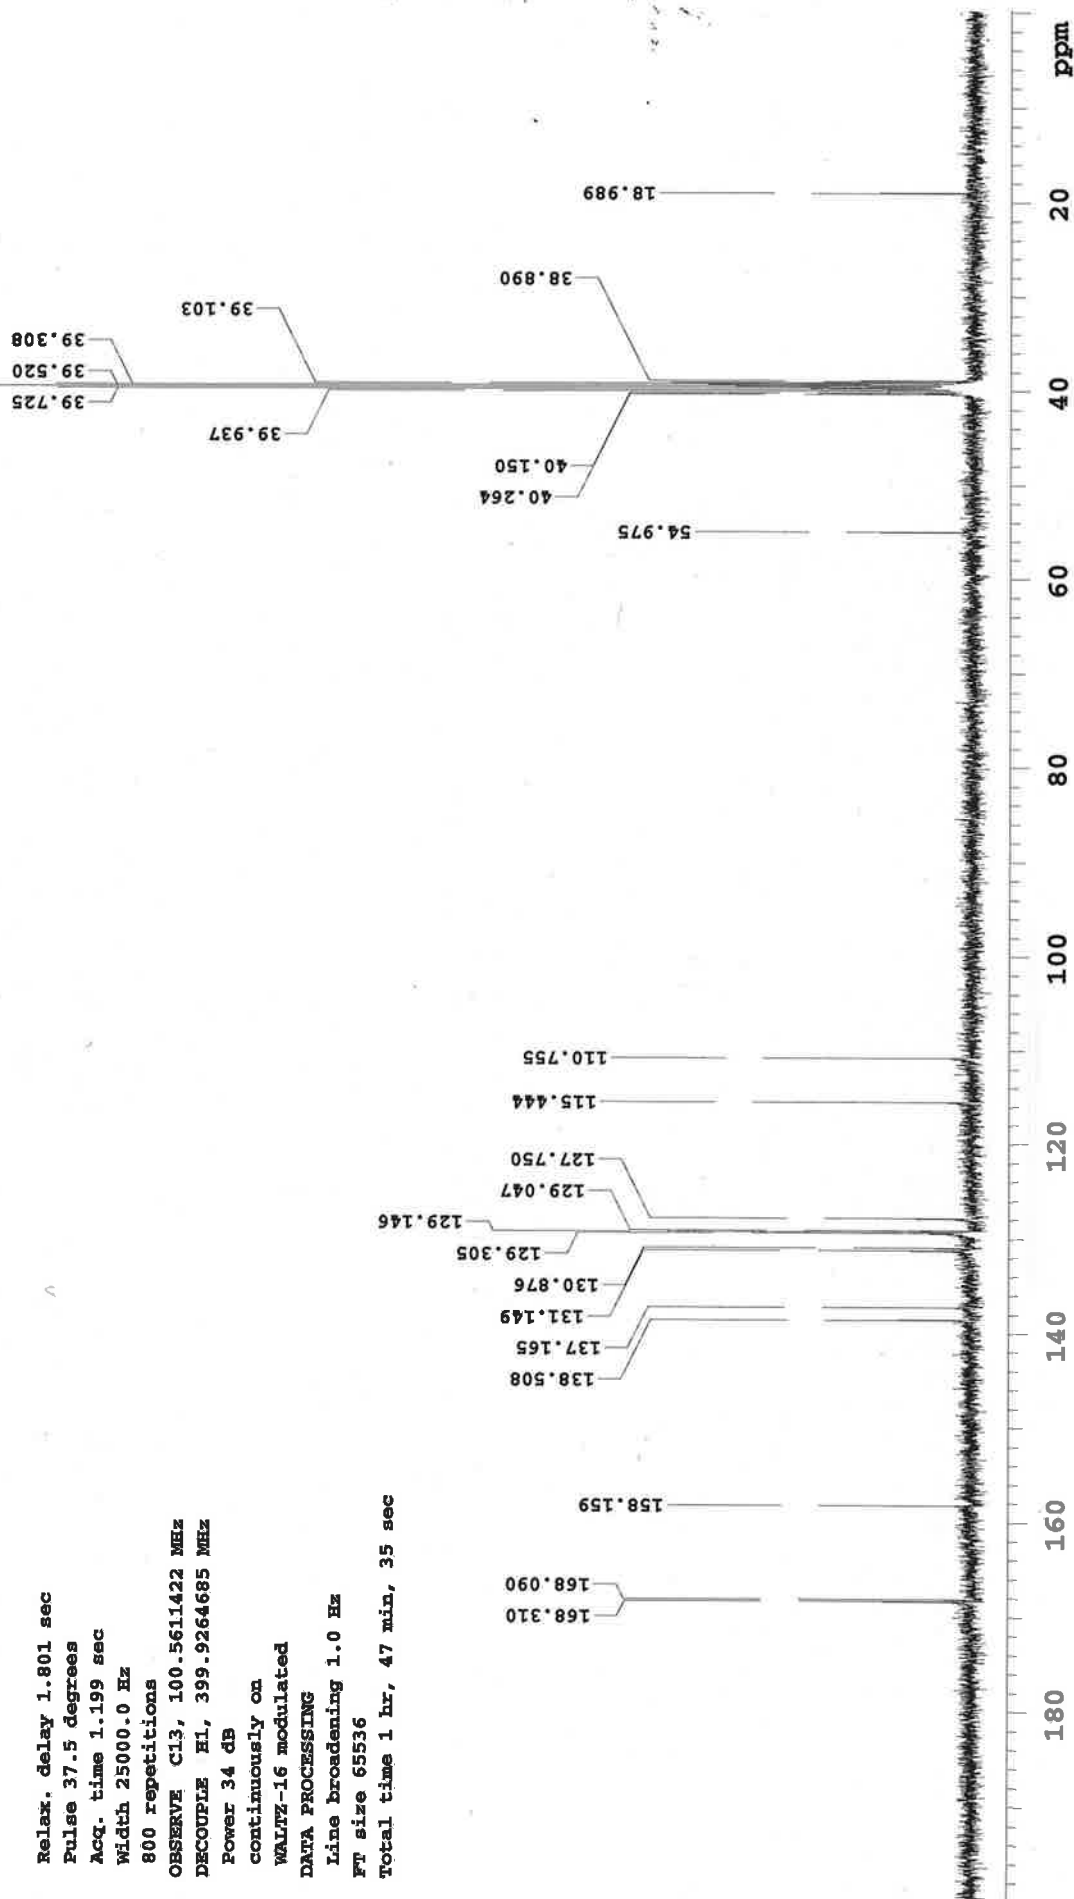

|                        |                     |                      |                     |                      |             |                  |         |
|------------------------|---------------------|----------------------|---------------------|----------------------|-------------|------------------|---------|
| Acquisition Time (sec) | 2.7320              | Comment              | STANDARD 1H OBSERVE | Date                 | Feb 26 2012 | Frequency (MHz)  | 399.93  |
| Date Stamp             | Feb 26 2012         | File Name            | C:\USRX\NMR\FID     | Points Count         | 16384       | Pulse Sequence   | s2pul   |
| Nucleus                | 1H                  | Number of Transients | 16                  | Spectrum Type        | STANDARD    | Sweep Width (Hz) | 5995.20 |
| Receiver Gain          | 20.00               | Solvent              | DMSO-d6             | Spectrum Offset (Hz) | 2247.6611   |                  |         |
| Temperature (degree C) | AMBIENT TEMPERATURE |                      |                     |                      |             |                  |         |

$^1\text{H}$  NMR (400 MHz, DMSO- $d_6$ )  $\delta$  8.94 (br. s., 1H), 7.66-7.89 (m, 4H), 7.39-7.62 (m, 4H), 4.47 (d,  $J$ =5.85 Hz, 2H)

VerticalScaleFactor = 1

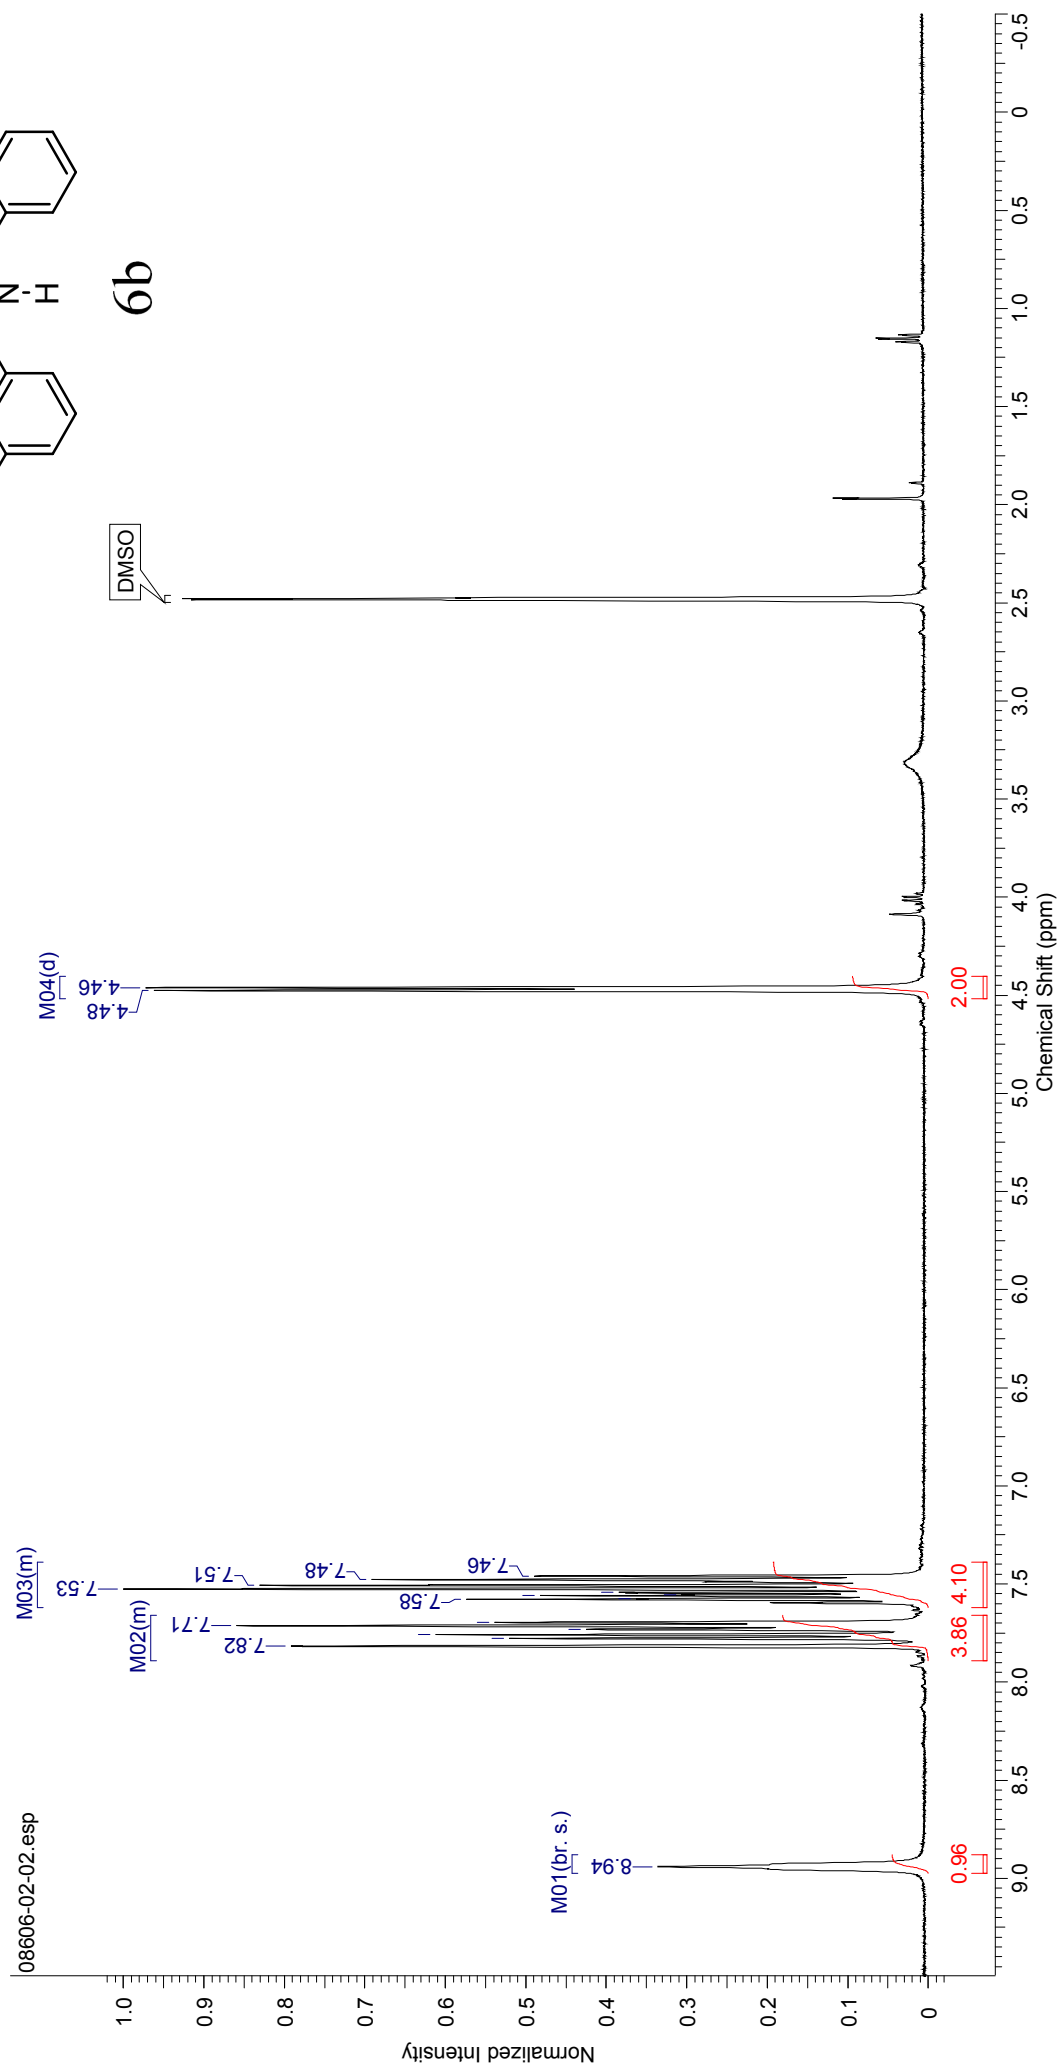

13C OBSERVE

Pulse Sequence: s2pul

Solvent: DMSO

Ambient temperature

Mercury-400BB "6Fback"

Relax. delay 1.801 sec

Pulse 37.5 degrees

Acq. time 1.199 sec

Width 25000.0 Hz

400 repetitions

OBSERVE C13, 100.5611422 MHz

DECOUPLE H1, 399.9264685 MHz

Power 34 dB

continuously on

WALTZ-16 modulated

DATA PROCESSING

Line broadening 1.0 Hz

FT size 65536

Total time 1 hr, 51 min, 37 sec

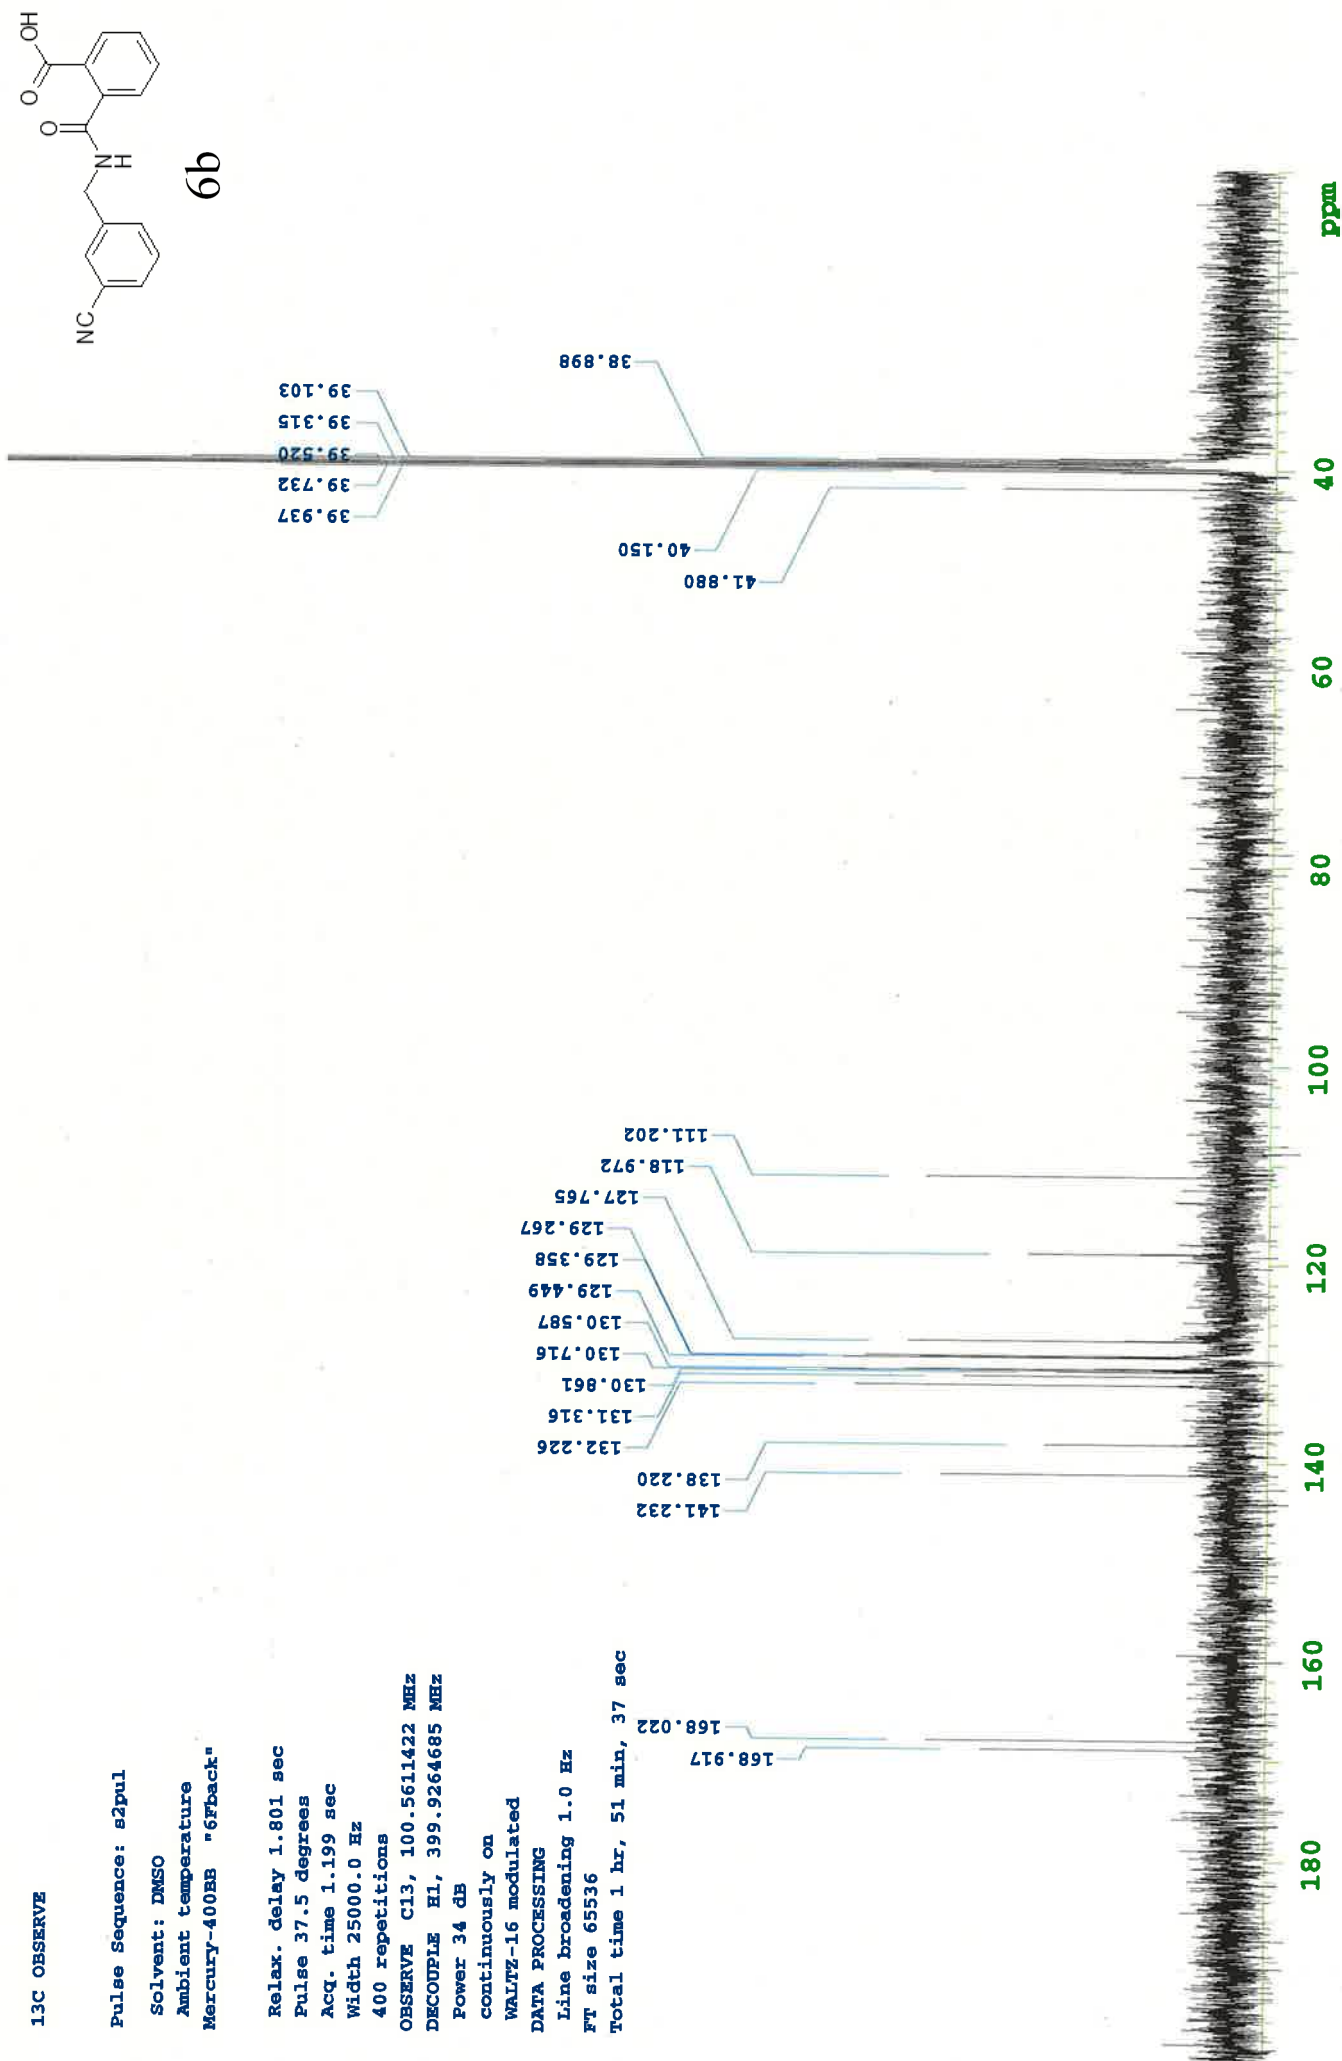

DFILE NOM123245.1  
 COMNT single\_pulse  
 DATIM 2012-03-23 22:48:14  
 OBNUC 1H  
 EXMOD single\_pulse.ex2  
 OBFRQ 490.15 MHz  
 OBSET 9.16 KHz  
 OBFIN 7.60 Hz  
 POINT 16384  
 FREQU 9191.18 Hz  
 SCANS 8  
 ACQTM 1.7826 sec  
 PD 3.0000 sec  
 FWH 8.55 usec  
 IRNUC 1H  
 CTEMP 24.5 c  
 SLVNT DMSO  
 EXREF 2.50 ppm  
 BF 0.12 Hz  
 RGAIN 30

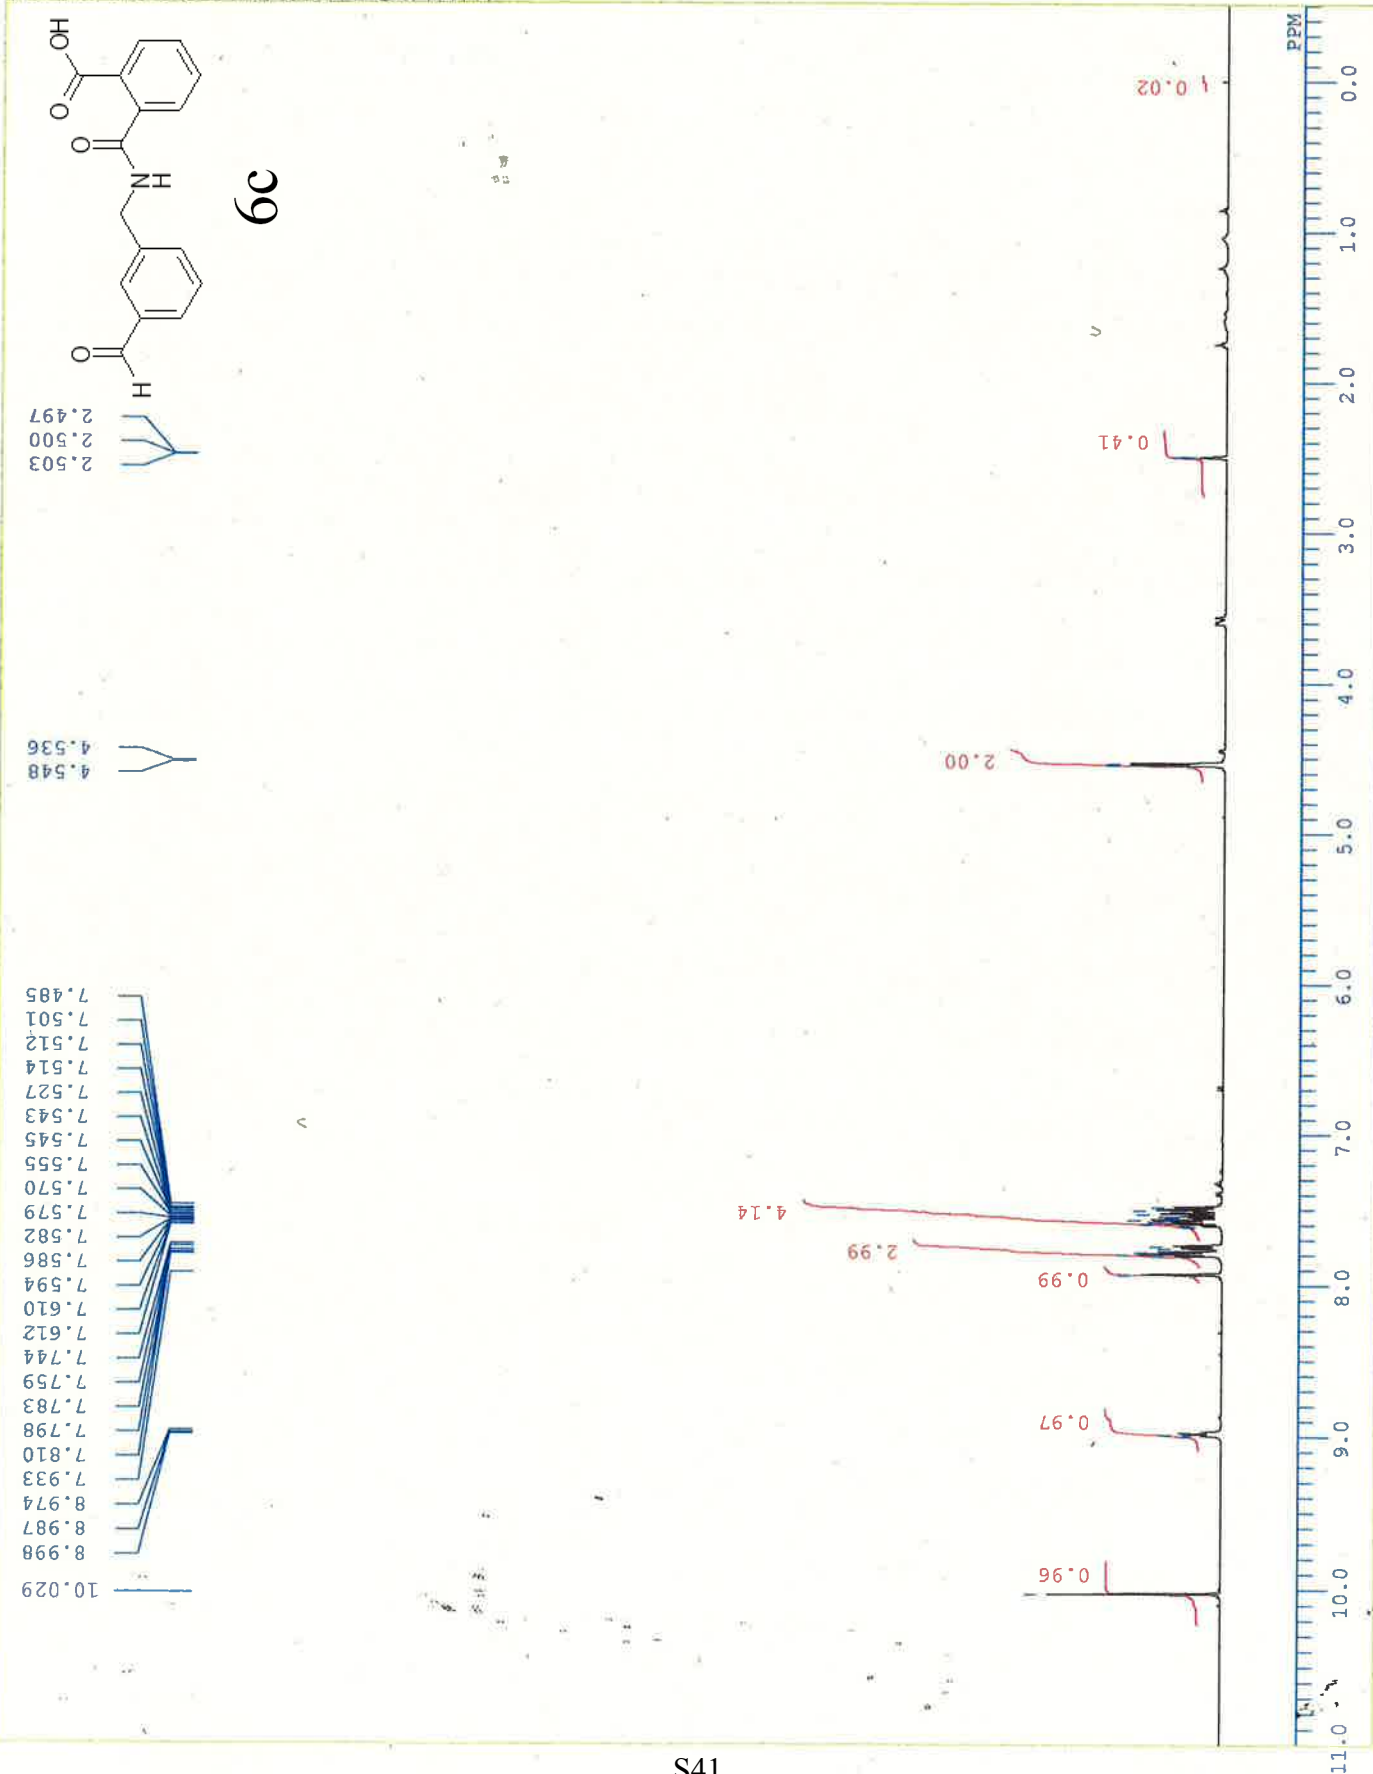

DFILE NOM123246(C).1  
 COMNT single pulse decoupl.  
 DATIM 2012-03-24 06:45:43  
 OBNUC 13C  
 EXMOD single pulse dec  
 OBFRQ 123.26 MHz  
 OBSET 2.31 KHz  
 OBFIN 6.71 Hz  
 POINT 32768  
 FREQU 38580.25 Hz  
 SCANS 10000  
 ACQTM 0.8493 sec  
 PD 2.0000 sec  
 PW1 3.20 usec  
 1H  
 IRNUC 25.0 C  
 CTMP DMSO  
 SLVNT 39.52 ppm  
 EXREF 0.12 Hz  
 BF 50  
 RGAIN

DFILE  
 COMNT  
 DATIM  
 OBNUC  
 EXMOD  
 OBFRQ  
 OBSET  
 OBFIN  
 POINT  
 FREQU  
 SCANS  
 ACQTM  
 PD  
 PW1  
 IRNUC  
 CTMP  
 SLVNT  
 EXREF  
 BF  
 RGAIN

42.185  
 40.045  
 39.873  
 39.702  
 39.530  
 39.358  
 39.186  
 39.023

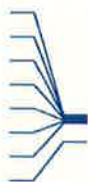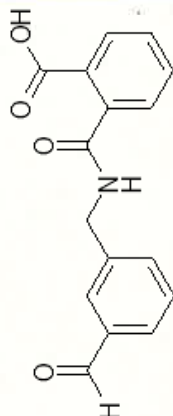

6c

140.798  
 138.228  
 136.289  
 133.500  
 131.226  
 131.035  
 129.335  
 129.258  
 129.115  
 128.389  
 127.835  
 127.730

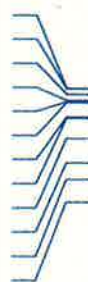

168.807  
 168.129

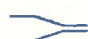

193.224

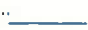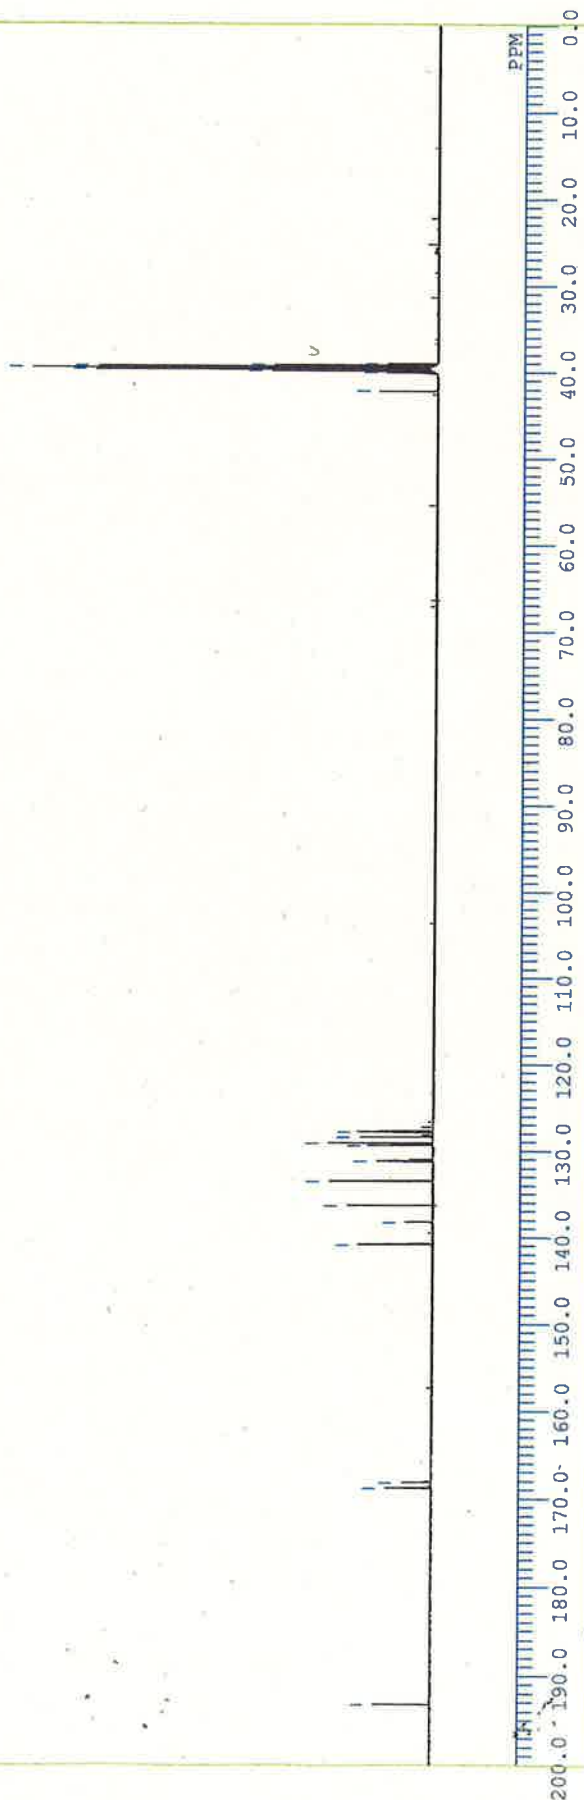

|                        |                     |                      |                     |                  |             |
|------------------------|---------------------|----------------------|---------------------|------------------|-------------|
| Acquisition Time (sec) | 2.7320              | Comment              | STANDARD 1H OBSERVE | Date             | Mar 20 2012 |
| Date Stamp             | Mar 20 2012         | File Name            | C:\USRR\NMR\FID     | Frequency (MHz)  | 399.93      |
| Nucleus                | 1H                  | Number of Transients | 16                  | Pulse Sequence   | s2pul       |
| Receiver Gain          | 12.00               | Solvent              | DMSO-d6             | Spectrum Type    | STANDARD    |
| Temperature (degree C) | AMBIENT TEMPERATURE | Spectrum Offset (Hz) | 2247.6611           | Sweep Width (Hz) | 5995.20     |

<sup>1</sup>H NMR (400 MHz, DMSO-d<sub>6</sub>) δ 8.96 (t, *J*=5.86 Hz, 1H), 7.91 (d, *J*=8.05 Hz, 2H), 7.73-7.79 (m, 1H), 7.43-7.62 (m, 5H), 4.50 (d, *J*=5.86 Hz, 2H), 3.83 (s, 3H)

VerticalScaleFactor = 1

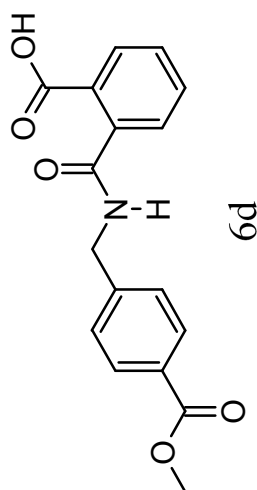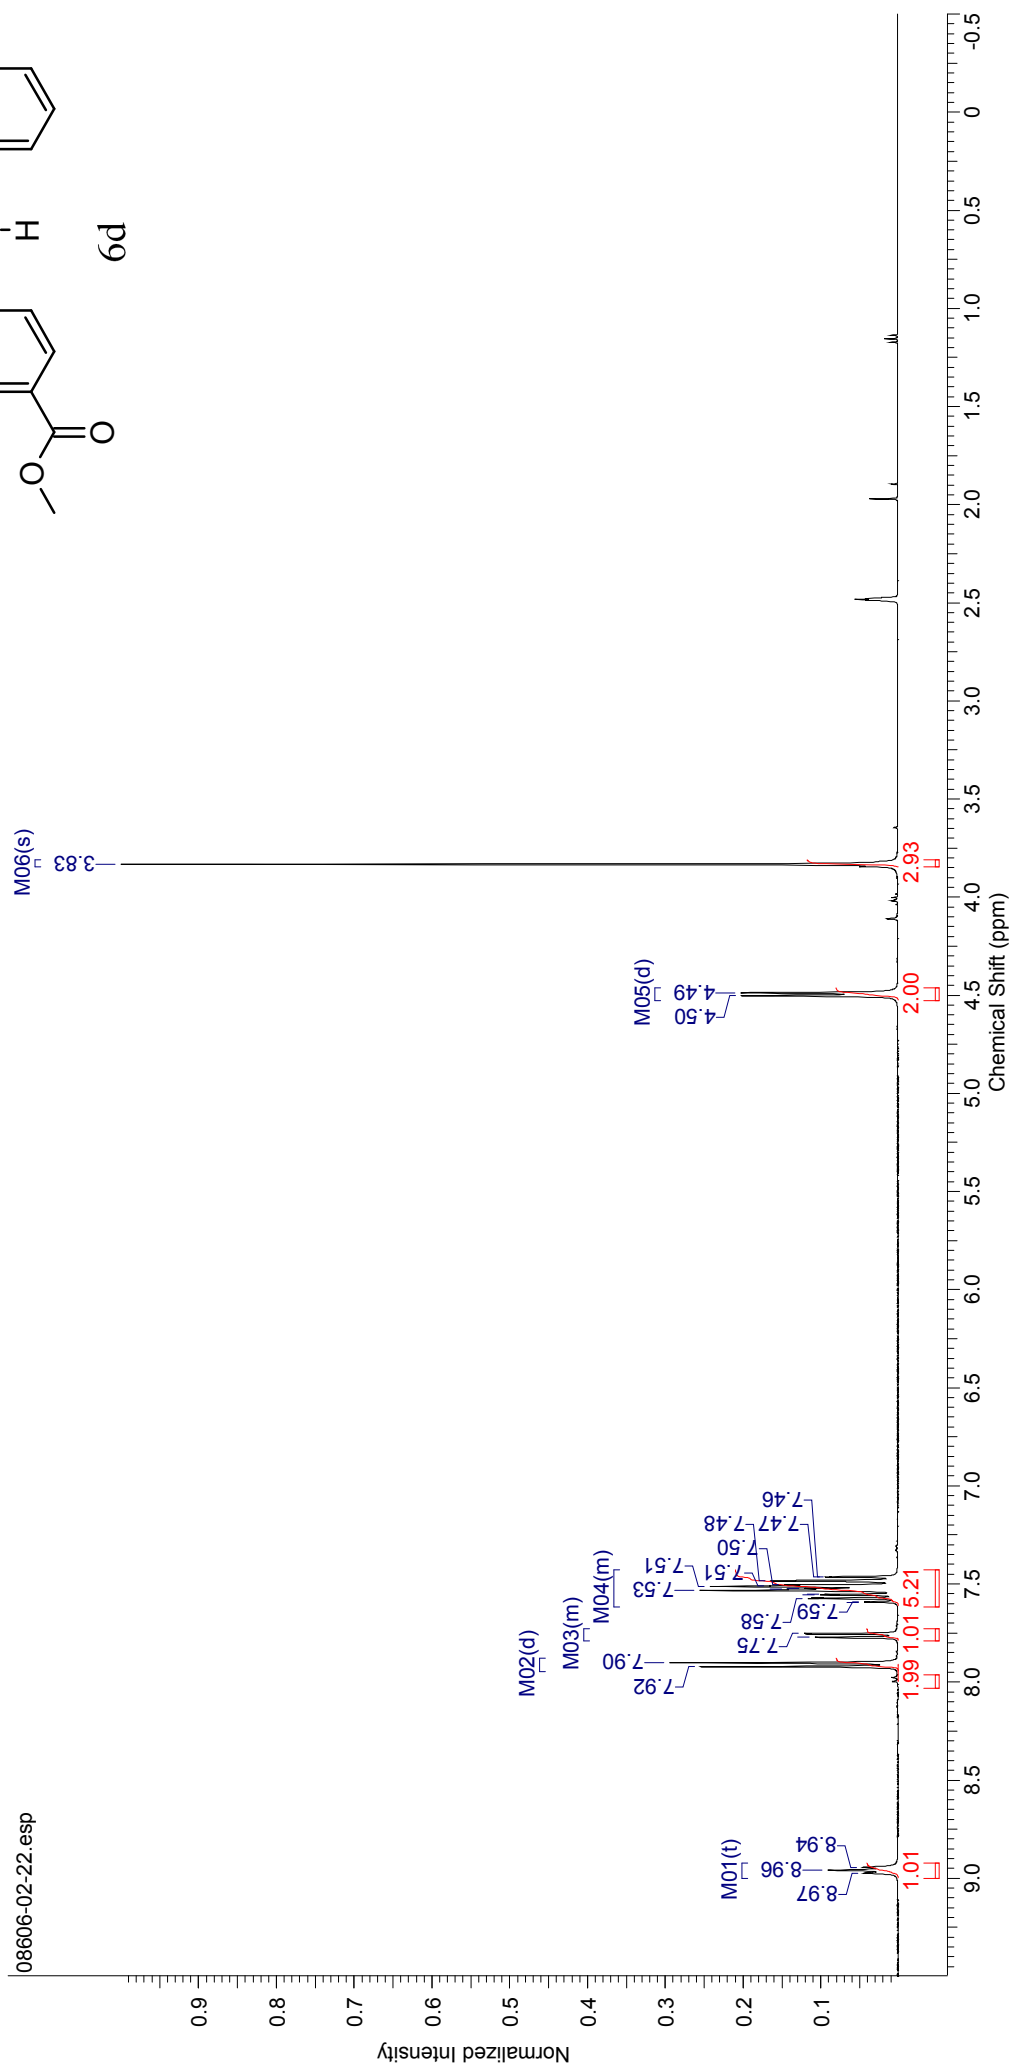

13C OBSERVE

Pulse Sequence: s2pul

Solvent: DMSO

Ambient temperature

Mercury-400BB "6Fback"

Relax. delay 1.801 sec

Pulse 37.5 degrees

Acq. time 1.199 sec

Width 25000.0 Hz

448 repetitions

OBSERVE C13, 100.5611429 MHz

DECOUPLE H1, 399.9264685 MHz

Power 34 dB

continuously on

WALTZ-16 modulated

DATA PROCESSING

Line broadening 1.0 Hz

FT size 65536

Total time 7 hr, 9 min, 56 sec

6d

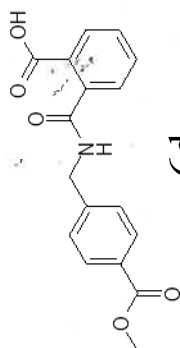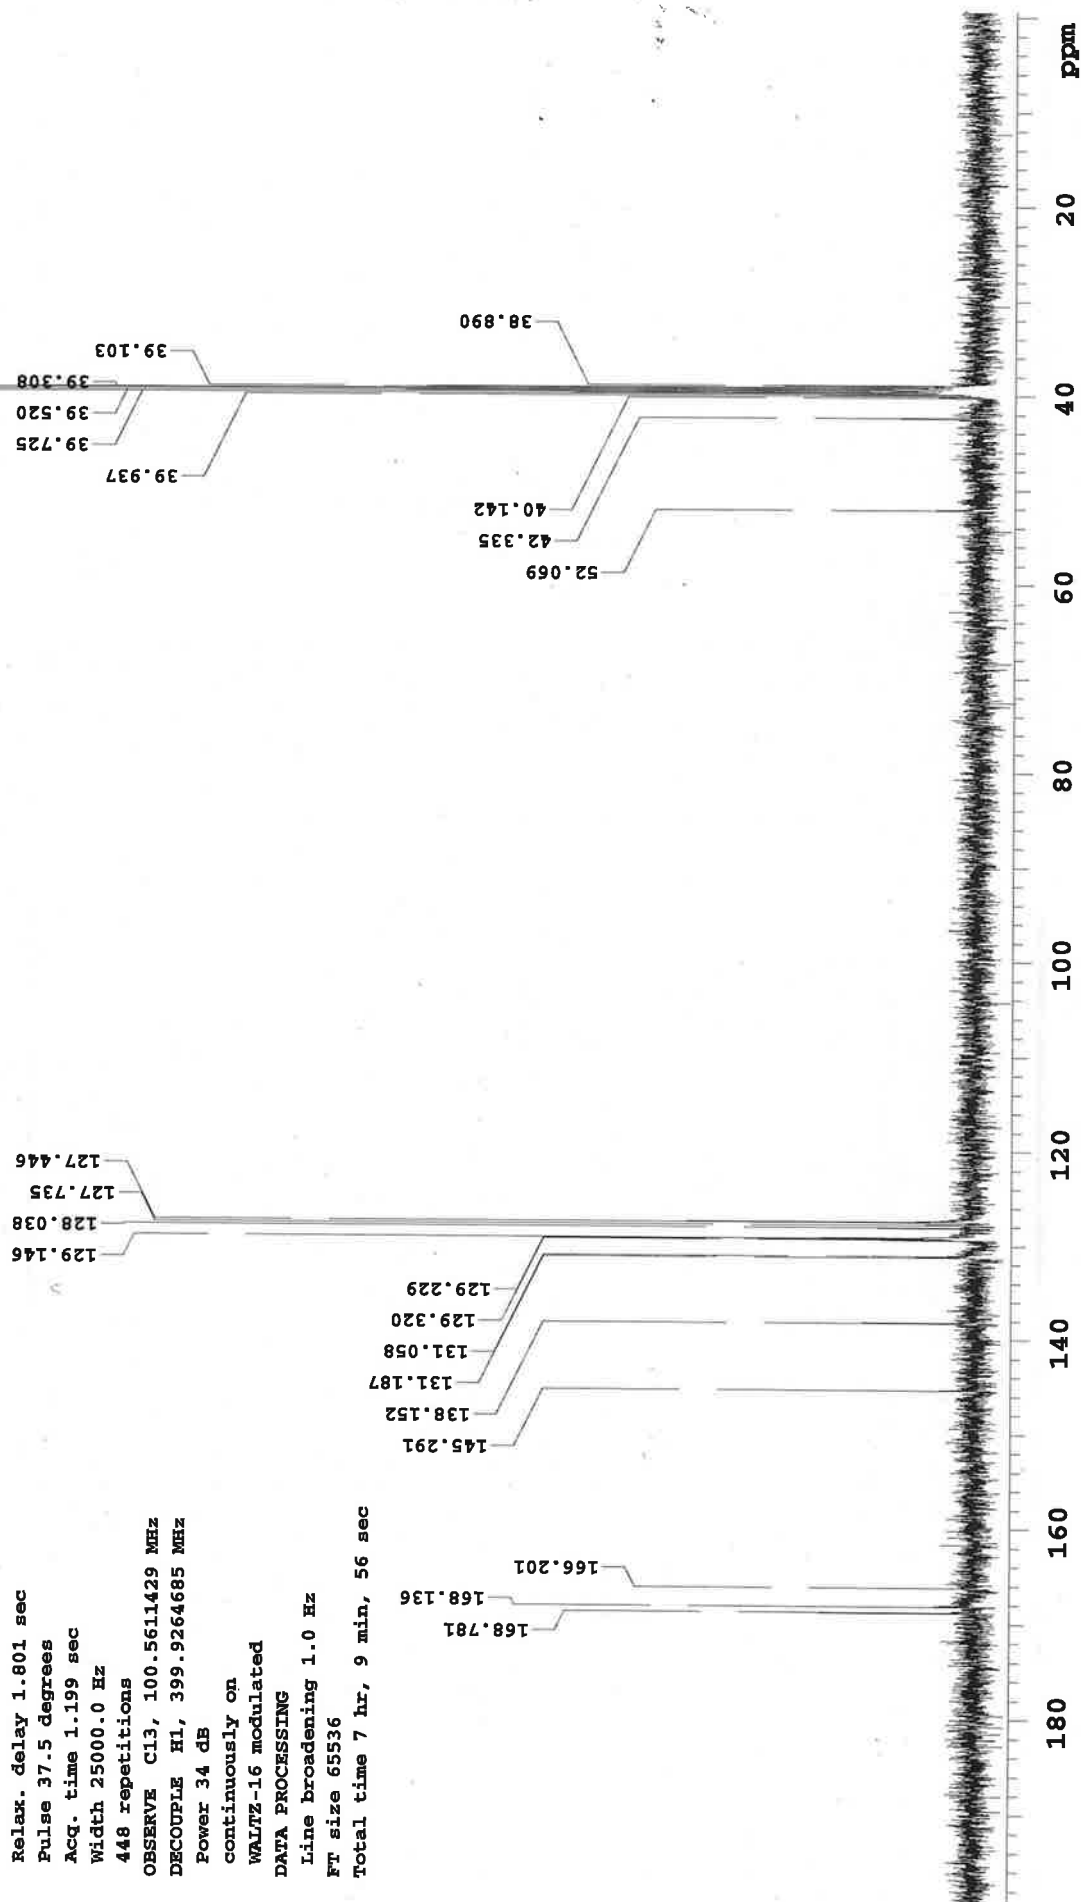

|         |                                                   |    |          |
|---------|---------------------------------------------------|----|----------|
| Formula | C <sub>13</sub> H <sub>11</sub> NO <sub>3</sub> S | FW | 261.2963 |
|---------|---------------------------------------------------|----|----------|

| Acquisition Time (sec) |             | 2.7320 | Comment              | STANDARD 1H OBSERVE |                       | Date      | Feb 26 2012      |         |
|------------------------|-------------|--------|----------------------|---------------------|-----------------------|-----------|------------------|---------|
| Date Stamp             | Feb 26 2012 | 1H     |                      | File Name           | C:\USR\NMR\FID        |           | Frequency (MHz)  | 399.93  |
| Nucleus                | 1H          | 16.00  | Number of Transients | 32                  | Original Points Count | 16379     | Pulse Sequence   | s2pul   |
| Receiver Gain          | 16.00       |        | Solvent              | DMSO-d <sub>6</sub> | Spectrum Offset (Hz)  | 2247.6611 | Sweep Width (Hz) | 5995.20 |
| Temperature (degree C) |             |        |                      | AMBIENT TEMPERATURE |                       |           |                  |         |

<sup>1</sup>H NMR (400 MHz, DMSO-d<sub>6</sub>) δ 12.95 (br. s., 1H), 8.94 (t, *J*=5.86 Hz, 1H), 8.94 (t, *J*=5.86 Hz, 1H), 7.75 (dd, *J*=1.28, 7.50 Hz, 1H), 7.46-7.60 (m, 2H), 7.35-7.42 (m, 2H), 7.04 (dd, *J*=0.91, 3.48 Hz, 1H), 6.95 (dd, *J*=3.29, 5.12 Hz, 1H), 4.57 (d, *J*=5.86 Hz, 2H)

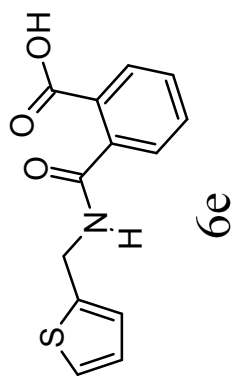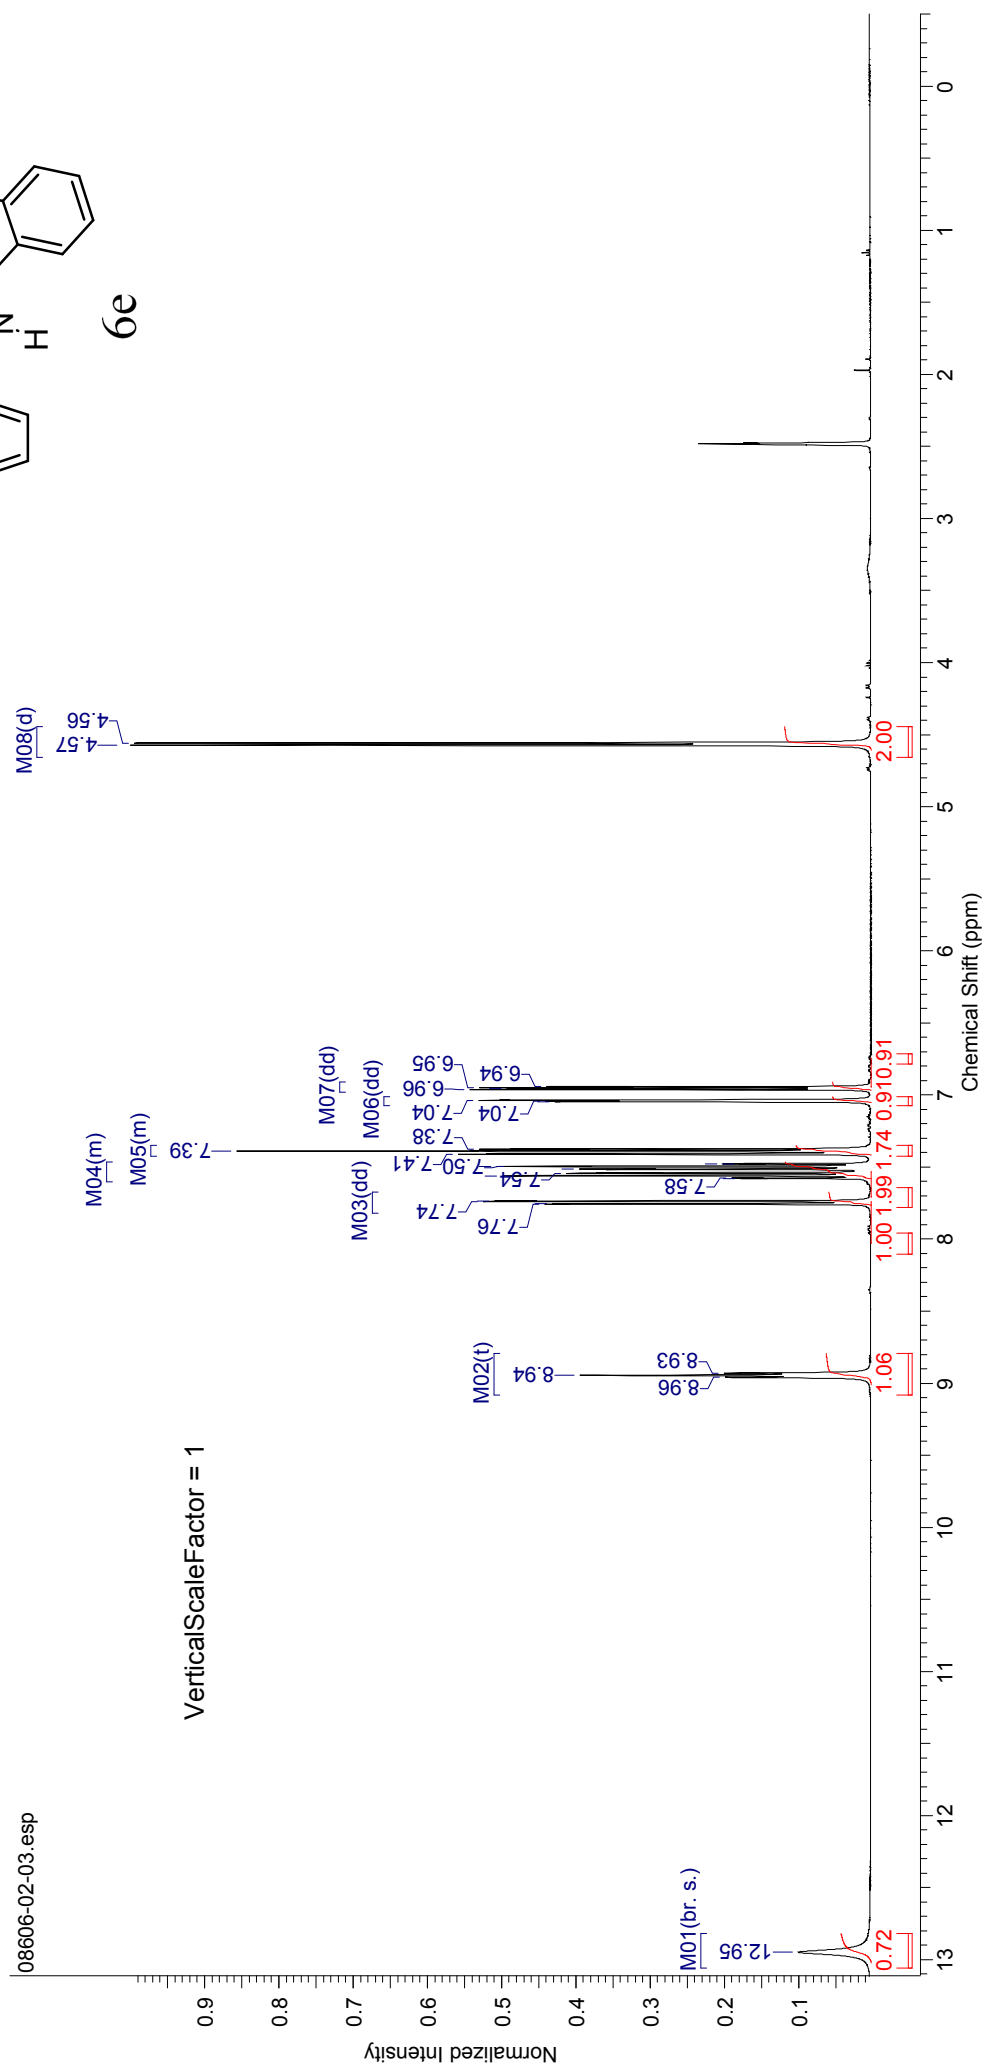

13C OBSERVE

Pulse Sequence: s2pul

Solvent: DMSO

Ambient temperature

Mercury-400RB "6fback"

Relax. delay 1.801 sec

Pulse 37.5 degrees

Acq. time 1.199 sec

Width 25000.0 Hz

512 repetitions

OBSERVE C13, 100.5611414 MHz

DECOUPLE H1, 399.9264685 MHz

Power 34 dB

continuously on

WALTZ-16 modulated

DATA PROCESSING

Line broadening 1.0 Hz

FT size 65536

Total time 1 hr, 51 min, 37 sec

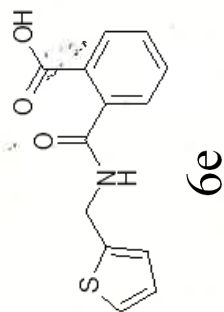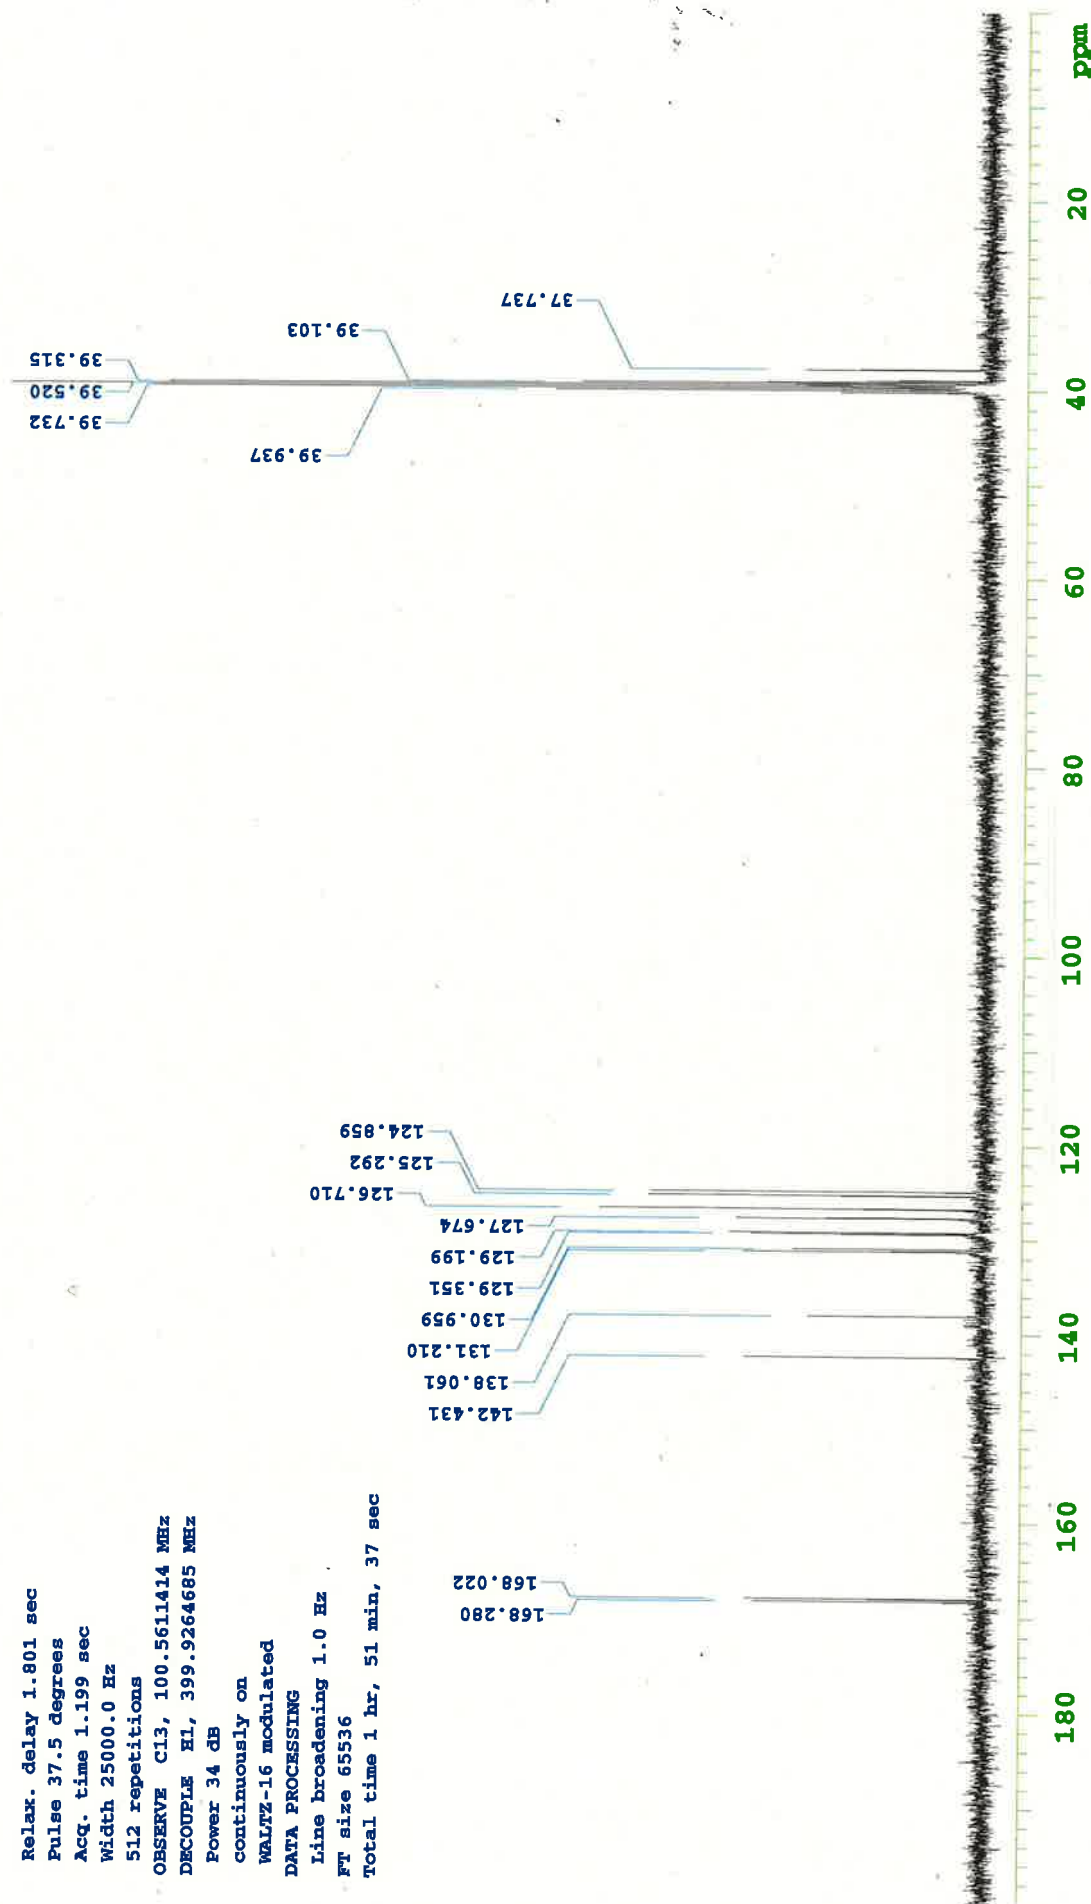

|                        |                     |                       |                     |                  |             |
|------------------------|---------------------|-----------------------|---------------------|------------------|-------------|
| Acquisition Time (sec) | 2.7320              | Comment               | STANDARD 1H OBSERVE | Date             | Mar 20 2012 |
| Date Stamp             | Mar 20 2012         | File Name             | C:\USRR\NMR\FID     | Frequency (MHz)  | 399.93      |
| Nucleus                | 1H                  | Number of Transients  | 32                  | Pulse Sequence   | s2pul       |
| Receiver Gain          | 12.00               | Solvent               | DMSO-d6             | Spectrum Type    | STANDARD    |
| Temperature (degree C) | AMBIENT TEMPERATURE | Original Points Count | 16379               | Points Count     | 16384       |
|                        |                     | Spectrum Offset (Hz)  | 2247.6611           | Sweep Width (Hz) | 5995.20     |

<sup>1</sup>H NMR (400 MHz, DMSO-d<sub>6</sub>) δ 12.96 (br. s., 1H), 8.80 (t, *J*=5.67 Hz, 1H), 8.14 (s, 1H), 7.74 (dd, *J*=8.05, 17.20 Hz, 2H), 7.47-7.60 (m, 2H), 7.42 (d, *J*=7.32 Hz, 1H), 6.76 (d, *J*=8.42 Hz, 1H), 4.36 (d, *J*=5.85 Hz, 2H), 3.82 (s, 3H)

VerticalScaleFactor = 1

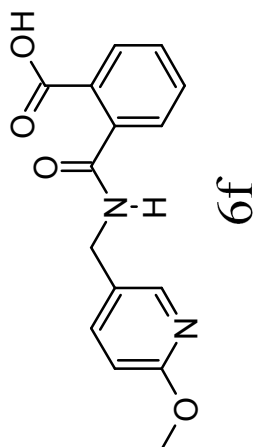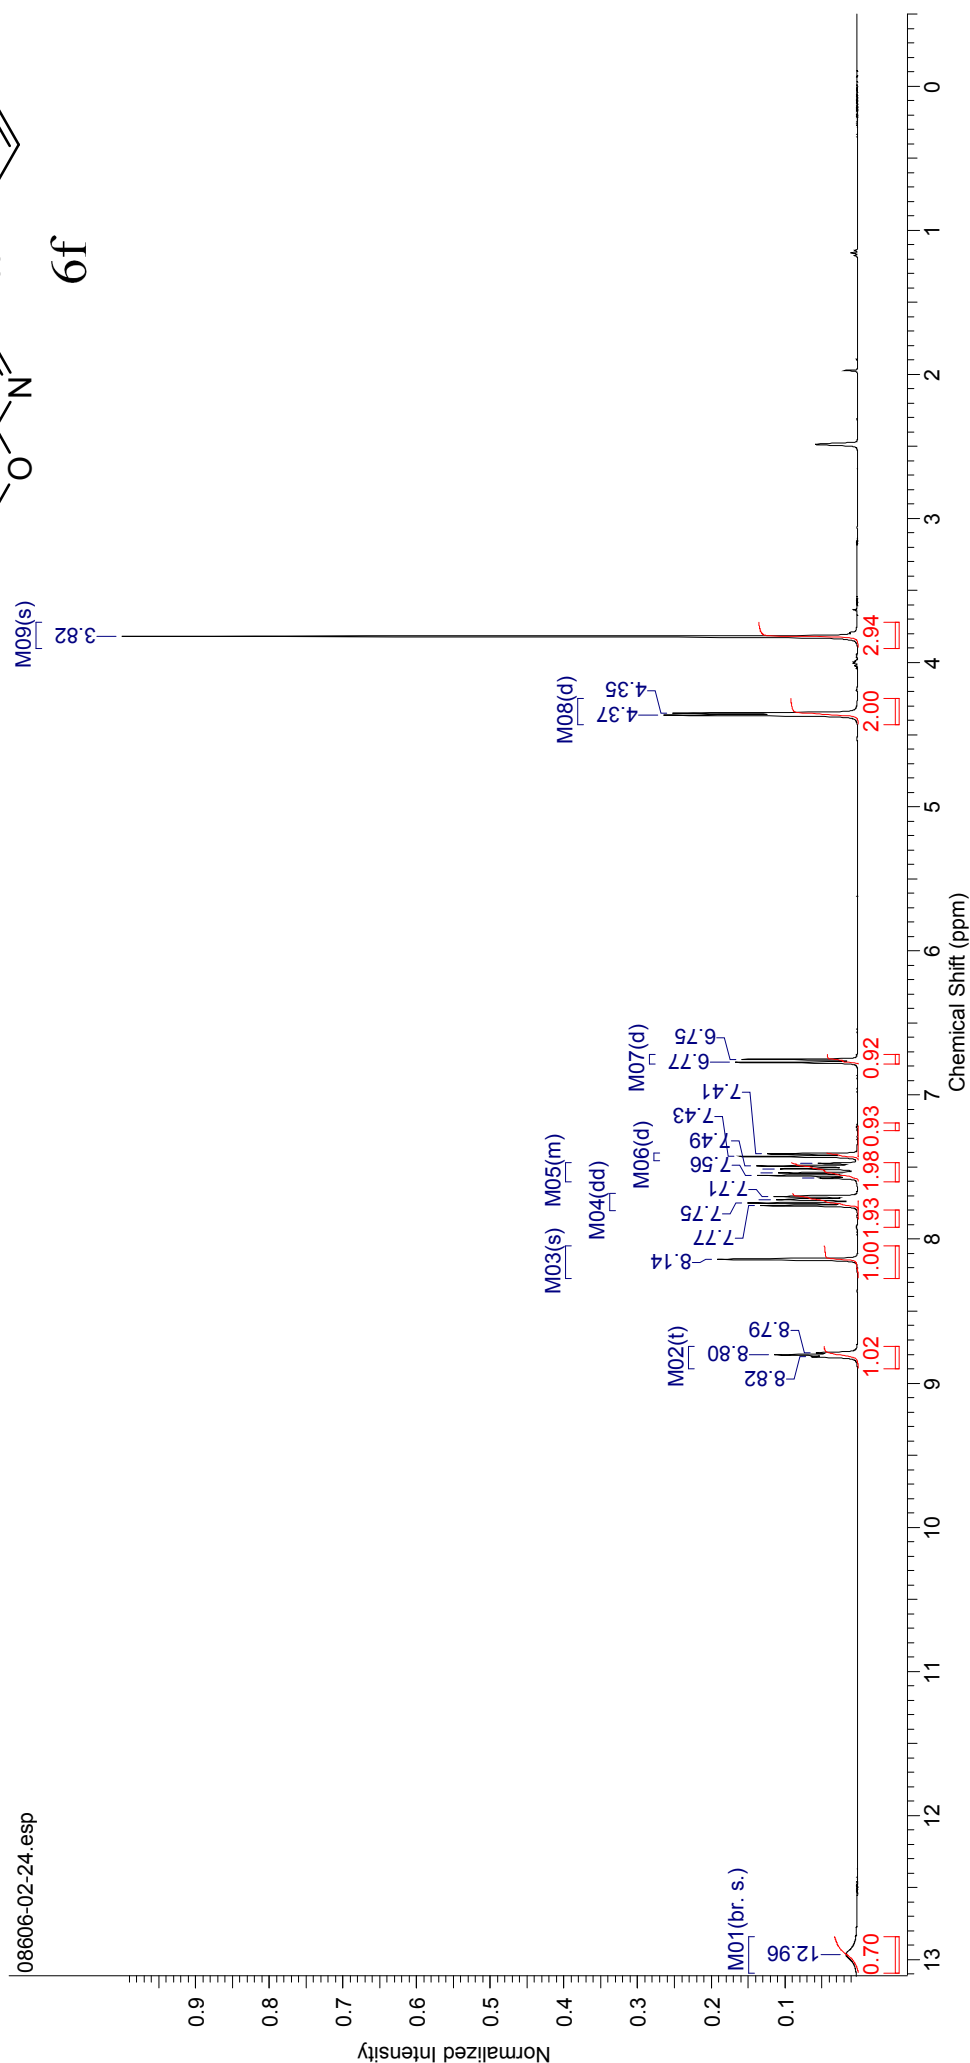

13C OBSERVE

Pulse Sequence: s2pul

Solvent: DMSO

Ambient temperature

Mercury-400BB "6Fback"

Relax. delay 1.801 sec

Pulse 37.5 degrees

Acq. time 1.199 sec

Width 25000.0 Hz

272 repetitions

OBSERVE C13, 100.5611429 MHz

DECOUPLE H1, 399.9264685 MHz

Power 34 dB

continuously on

WALTZ-16 modulated

DATA PROCESSING

Line broadening 1.0 Hz

FT size 65536

Total time 7 hr, 26 min, 4 sec

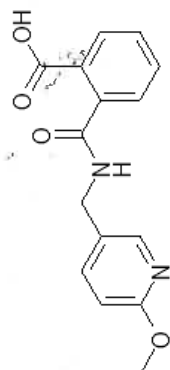

6f

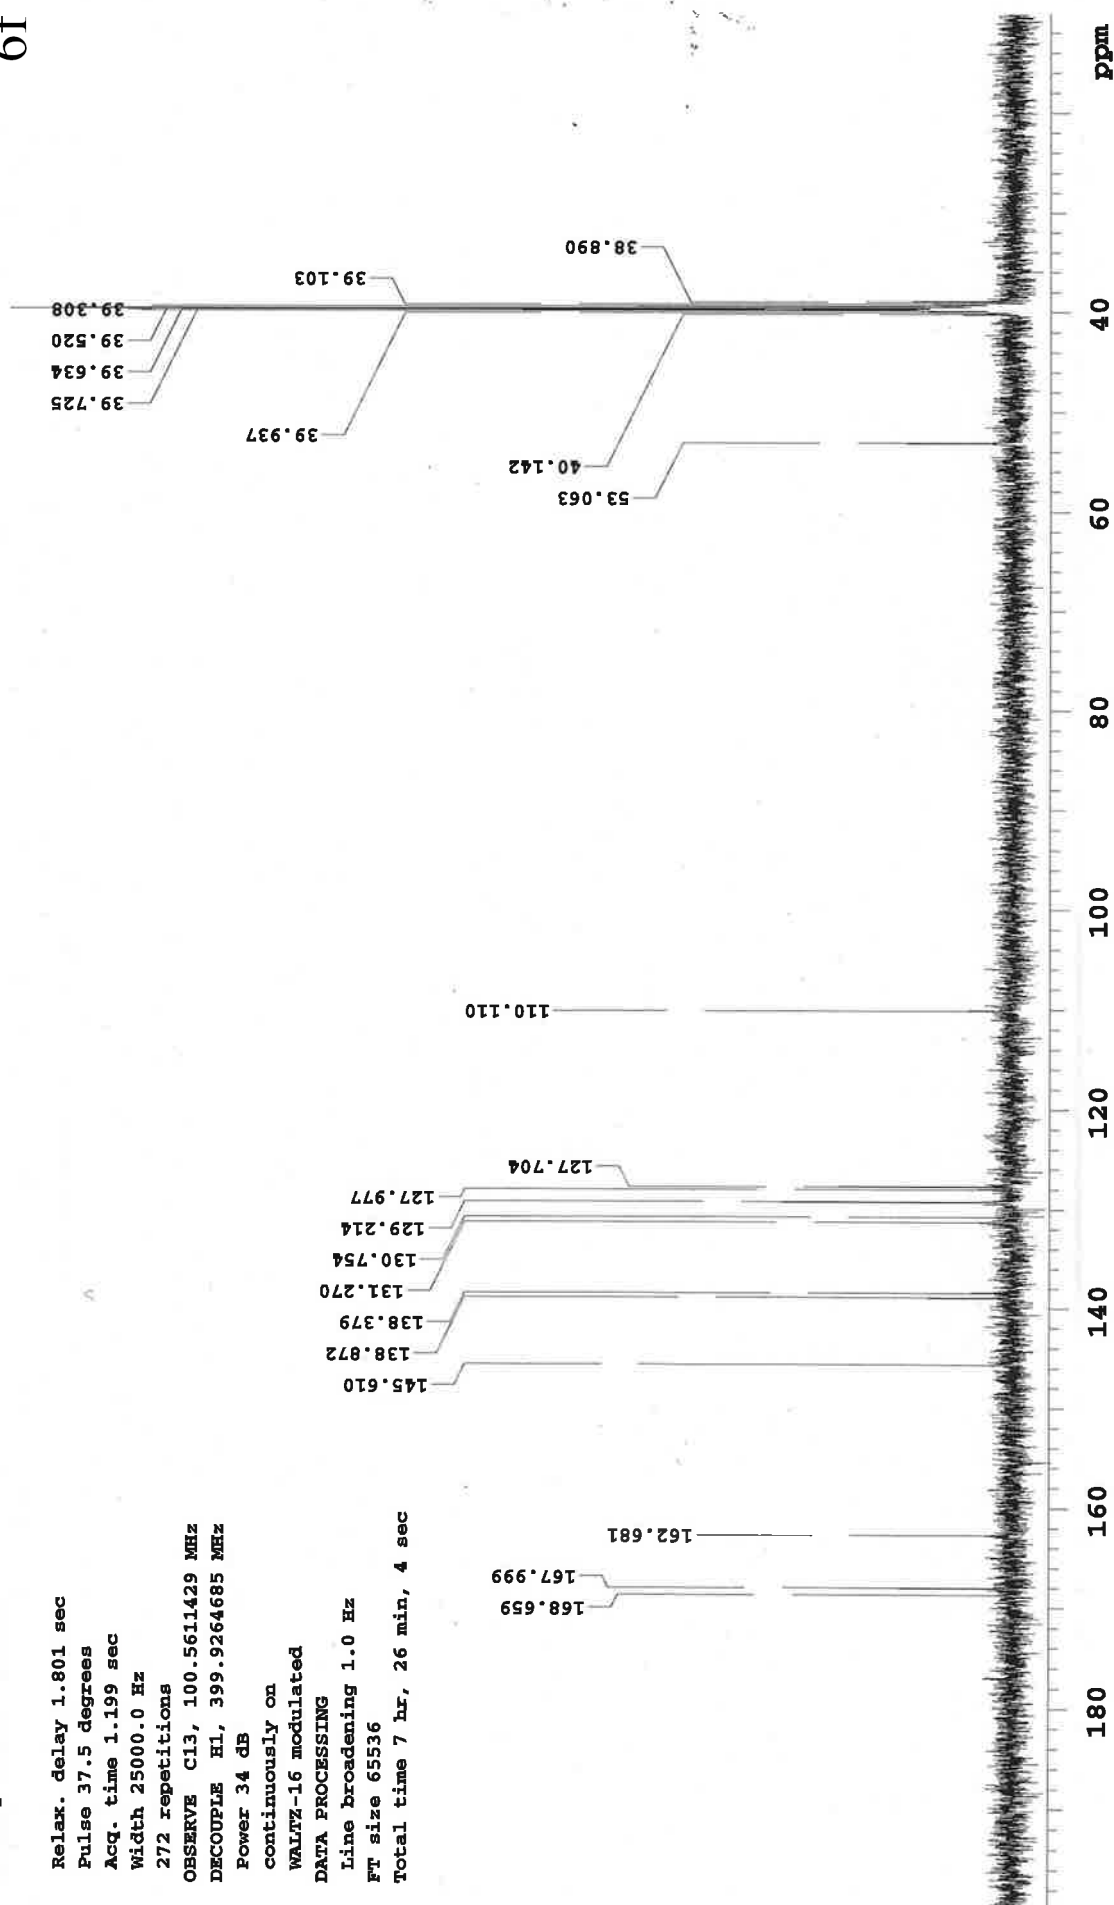

|         |                                   |    |          |
|---------|-----------------------------------|----|----------|
| Formula | C <sub>11</sub> H <sub>11</sub> N | FW | 157.2117 |
|---------|-----------------------------------|----|----------|

|                        |                |               |                     |                  |         |                        |                      |             |
|------------------------|----------------|---------------|---------------------|------------------|---------|------------------------|----------------------|-------------|
| Acquisition Time (sec) | 2.7320         | Comment       | STANDARD 1H OBSERVE |                  | Date    | Feb 25 2012            | Date Stamp           | Feb 25 2012 |
| File Name              | C:\USR\NMR\FID |               | Frequency (MHz)     | 399.92           | Nucleus | 1H                     | Number of Transients | 16          |
| Original Points Count  | 16379          | Points Count  | 16384               | Pulse Sequence   | s2pul   | Receiver Gain          | 16.00                | Solvent     |
| Spectrum Offset (Hz)   | 2244.4961      | Spectrum Type | STANDARD            | Sweep Width (Hz) | 5995.20 | Temperature (degree C) | AMBIENT TEMPERATURE  |             |
|                        |                |               |                     |                  |         |                        | CHLOROFORM-d         |             |

<sup>1</sup>H NMR (400 MHz, CHLOROFORM-d)  $\delta$  7.82 (d, *J*=8.05 Hz, 3H), 7.75 (s, 1H), 7.39-7.51 (m, 3H), 4.03 (s, 2H), 1.56 (s, 2H)

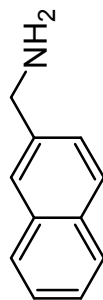

7a

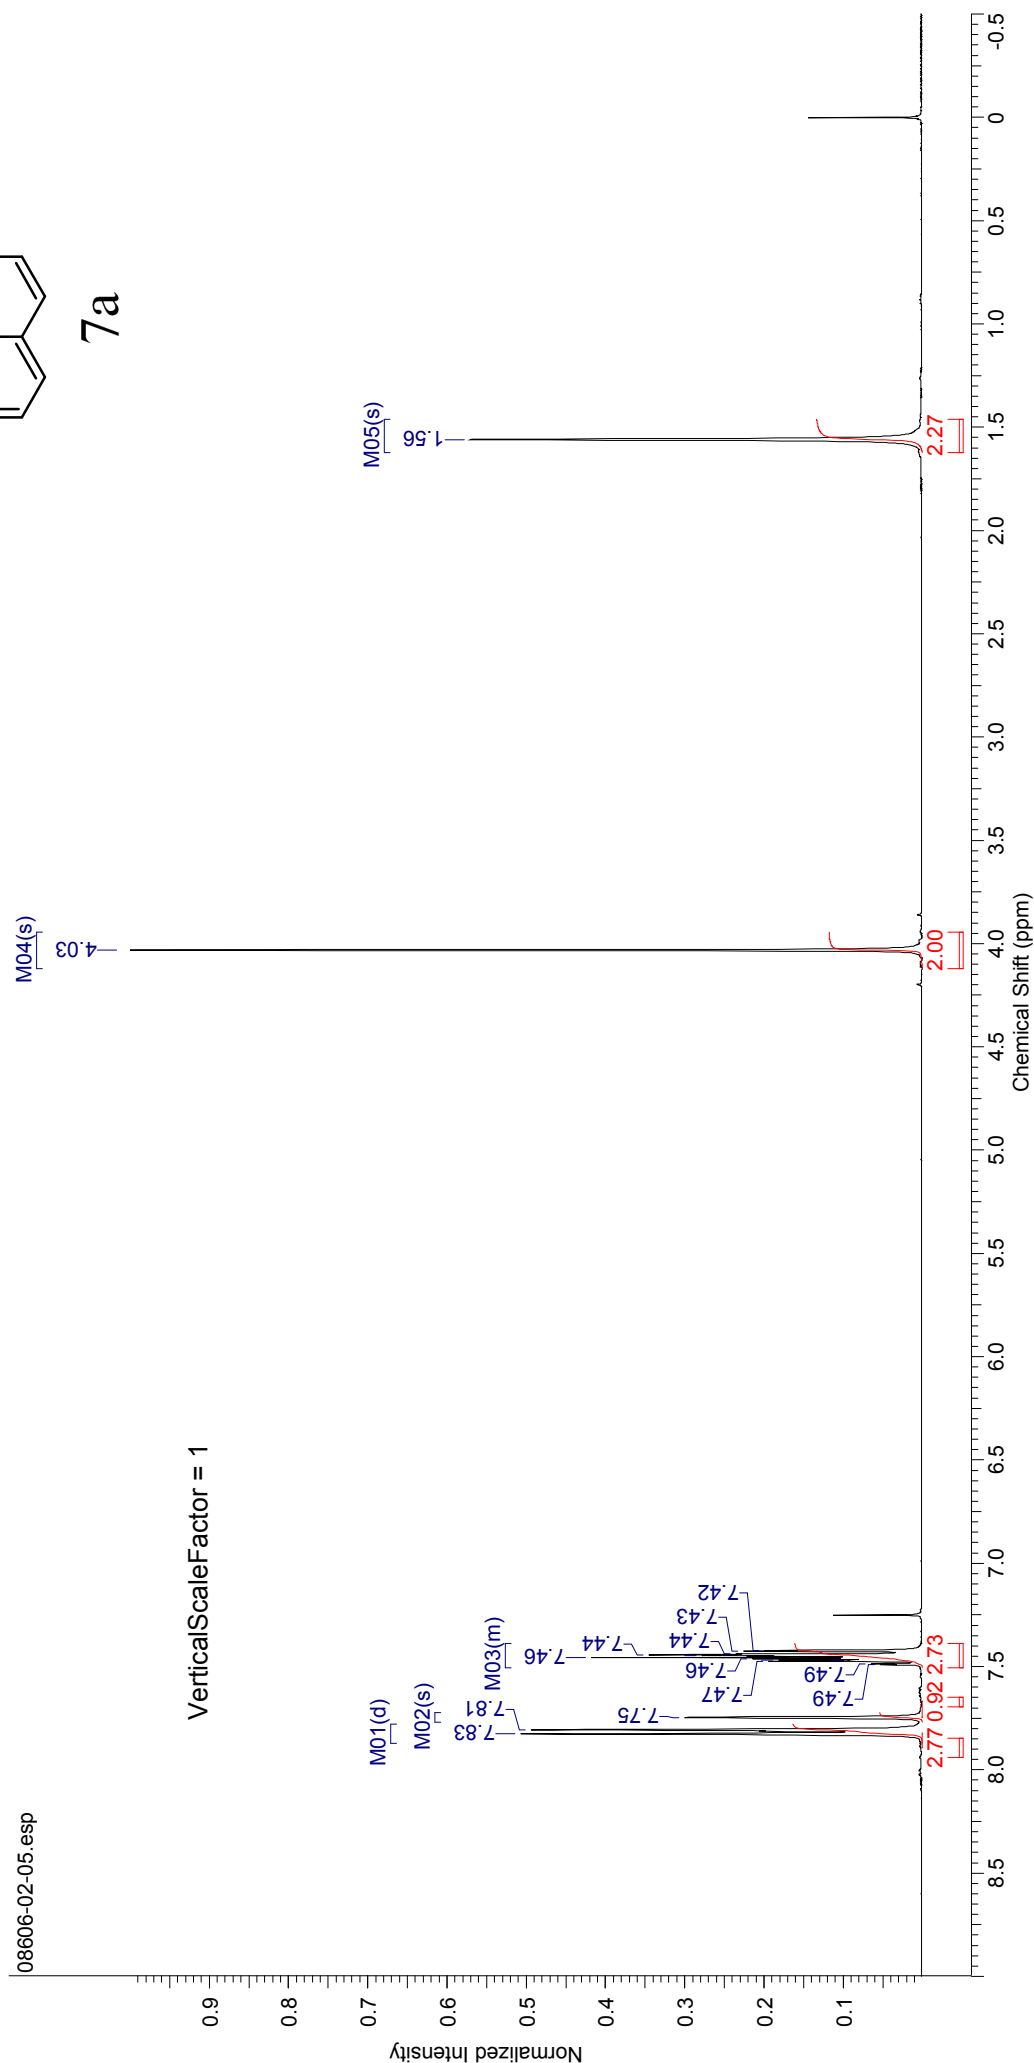

13C OBSERVE

Pulse Sequence: s2pul

Solvent: CDCl3

Ambient temperature

Mercury-400BB "6fback"

Relax. delay 1.801 sec

Pulse 37.5 degrees

Acq. time 1.199 sec

Width 25000.0 Hz

384 repetitions

OBSERVE C13, 100.5606110 MHz

DECOUPLE H1, 399.9245689 MHz

Power 34 dB

continuously on

WALTZ-16 modulated

DATA PROCESSING

Line broadening 1.0 Hz

FT size 65536

Total time 1 hr, 47 min, 29 sec

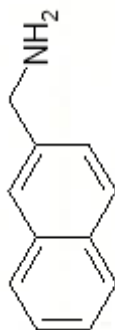

7a

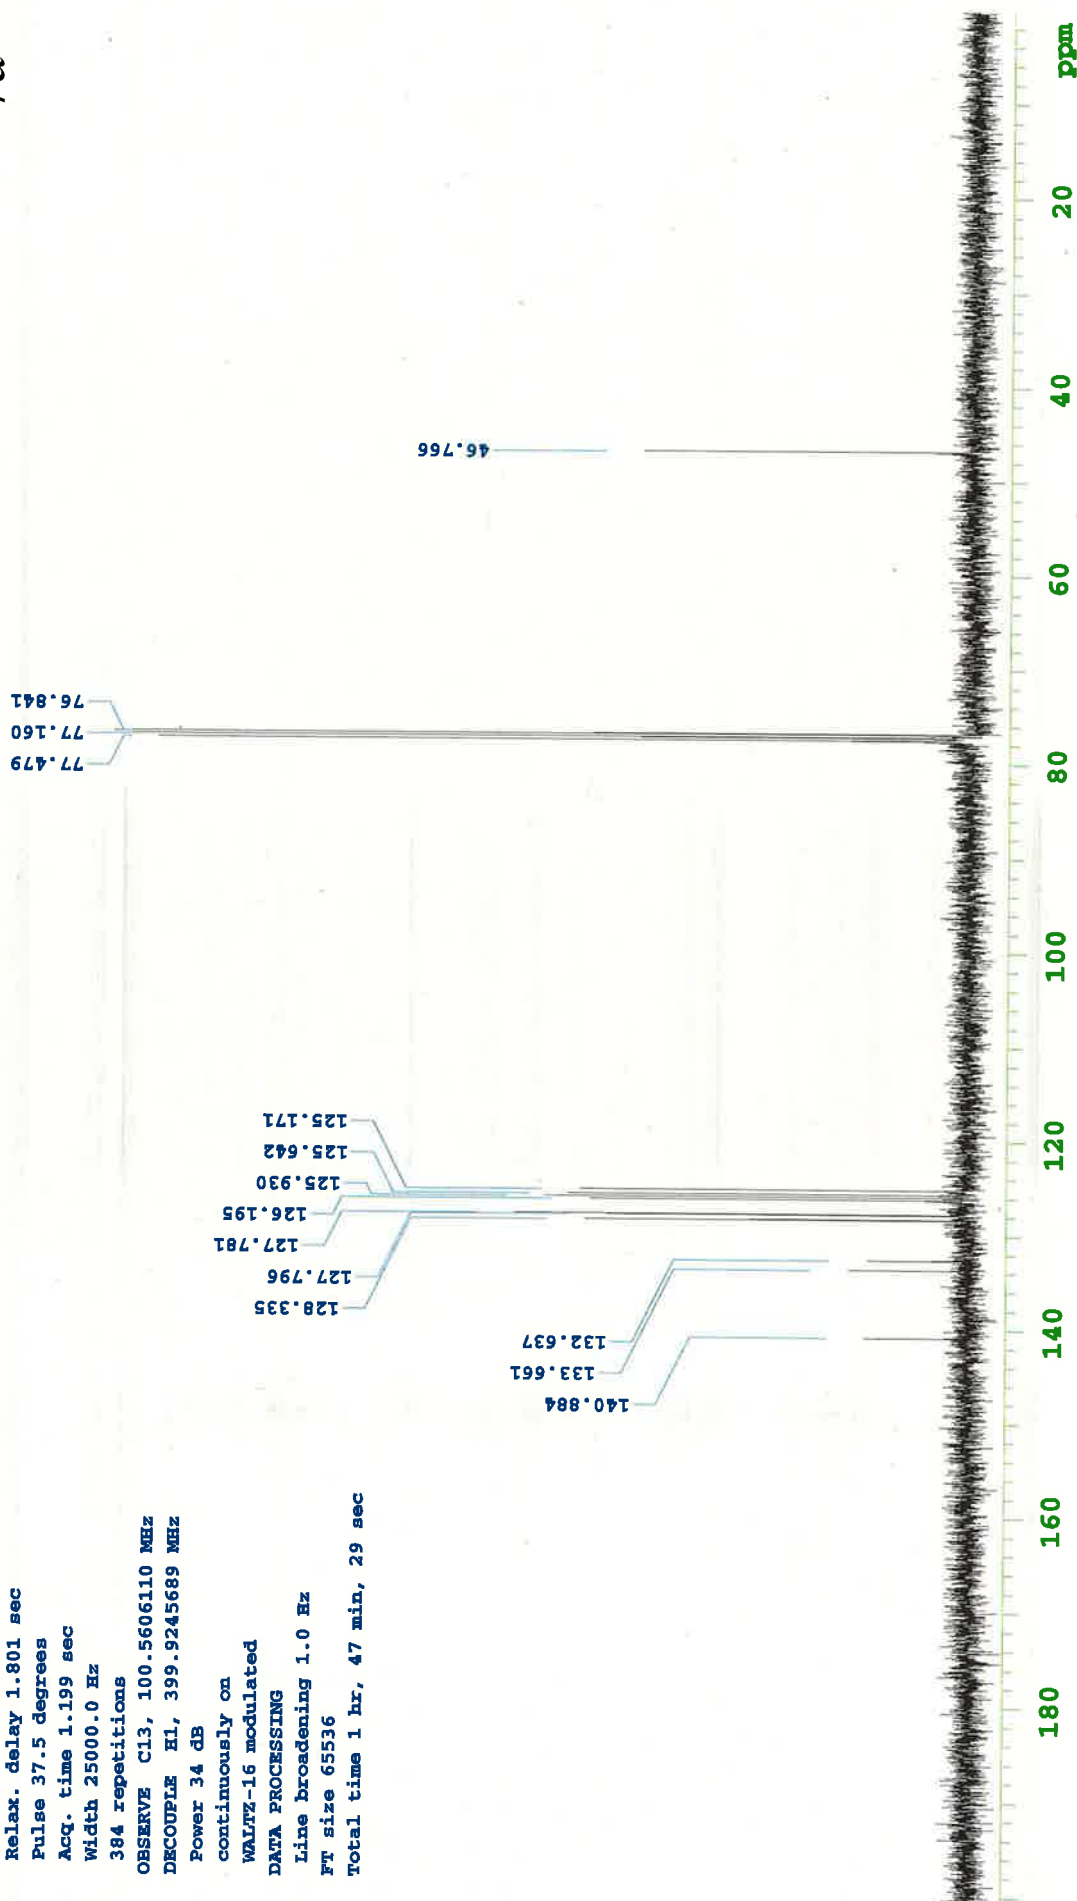

|         |                                   |    |          |
|---------|-----------------------------------|----|----------|
| Formula | C <sub>9</sub> H <sub>13</sub> NO | FW | 151.2056 |
|---------|-----------------------------------|----|----------|

|                        |                 |               |                     |                  |         |                        |                      |             |              |             |
|------------------------|-----------------|---------------|---------------------|------------------|---------|------------------------|----------------------|-------------|--------------|-------------|
| Acquisition Time (sec) | 2.7320          | Comment       | STANDARD 1H OBSERVE |                  |         |                        | Date                 | Feb 25 2012 | Date Stamp   | Feb 25 2012 |
| File Name              | C:\USRX\NMR\FID |               | Frequency (MHz)     | 399.92           | Nucleus | 1H                     | Number of Transients |             | 32           |             |
| Original Points Count  | 16379           | Points Count  | 16384               | Pulse Sequence   | s2pul   | Receiver Gain          | 10.00                | Solvent     | CHLOROFORM-d |             |
| Spectrum Offset (Hz)   | 2248.5215       | Spectrum Type | STANDARD            | Sweep Width (Hz) | 5995.20 | Temperature (degree C) | AMBIENT TEMPERATURE  |             |              |             |

<sup>1</sup>H NMR (400 MHz, CHLOROFORM-d)  $\delta$  7.19 (d,  $J$ =9.15 Hz, 1H), 6.67-6.76 (m, 2H), 3.79 (s, 2H), 3.78 (s, 3H), 2.33 (s, 3H), 1.51 (s, 2H)

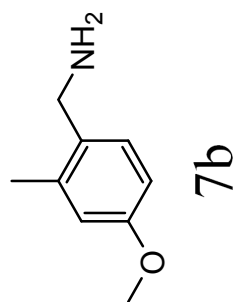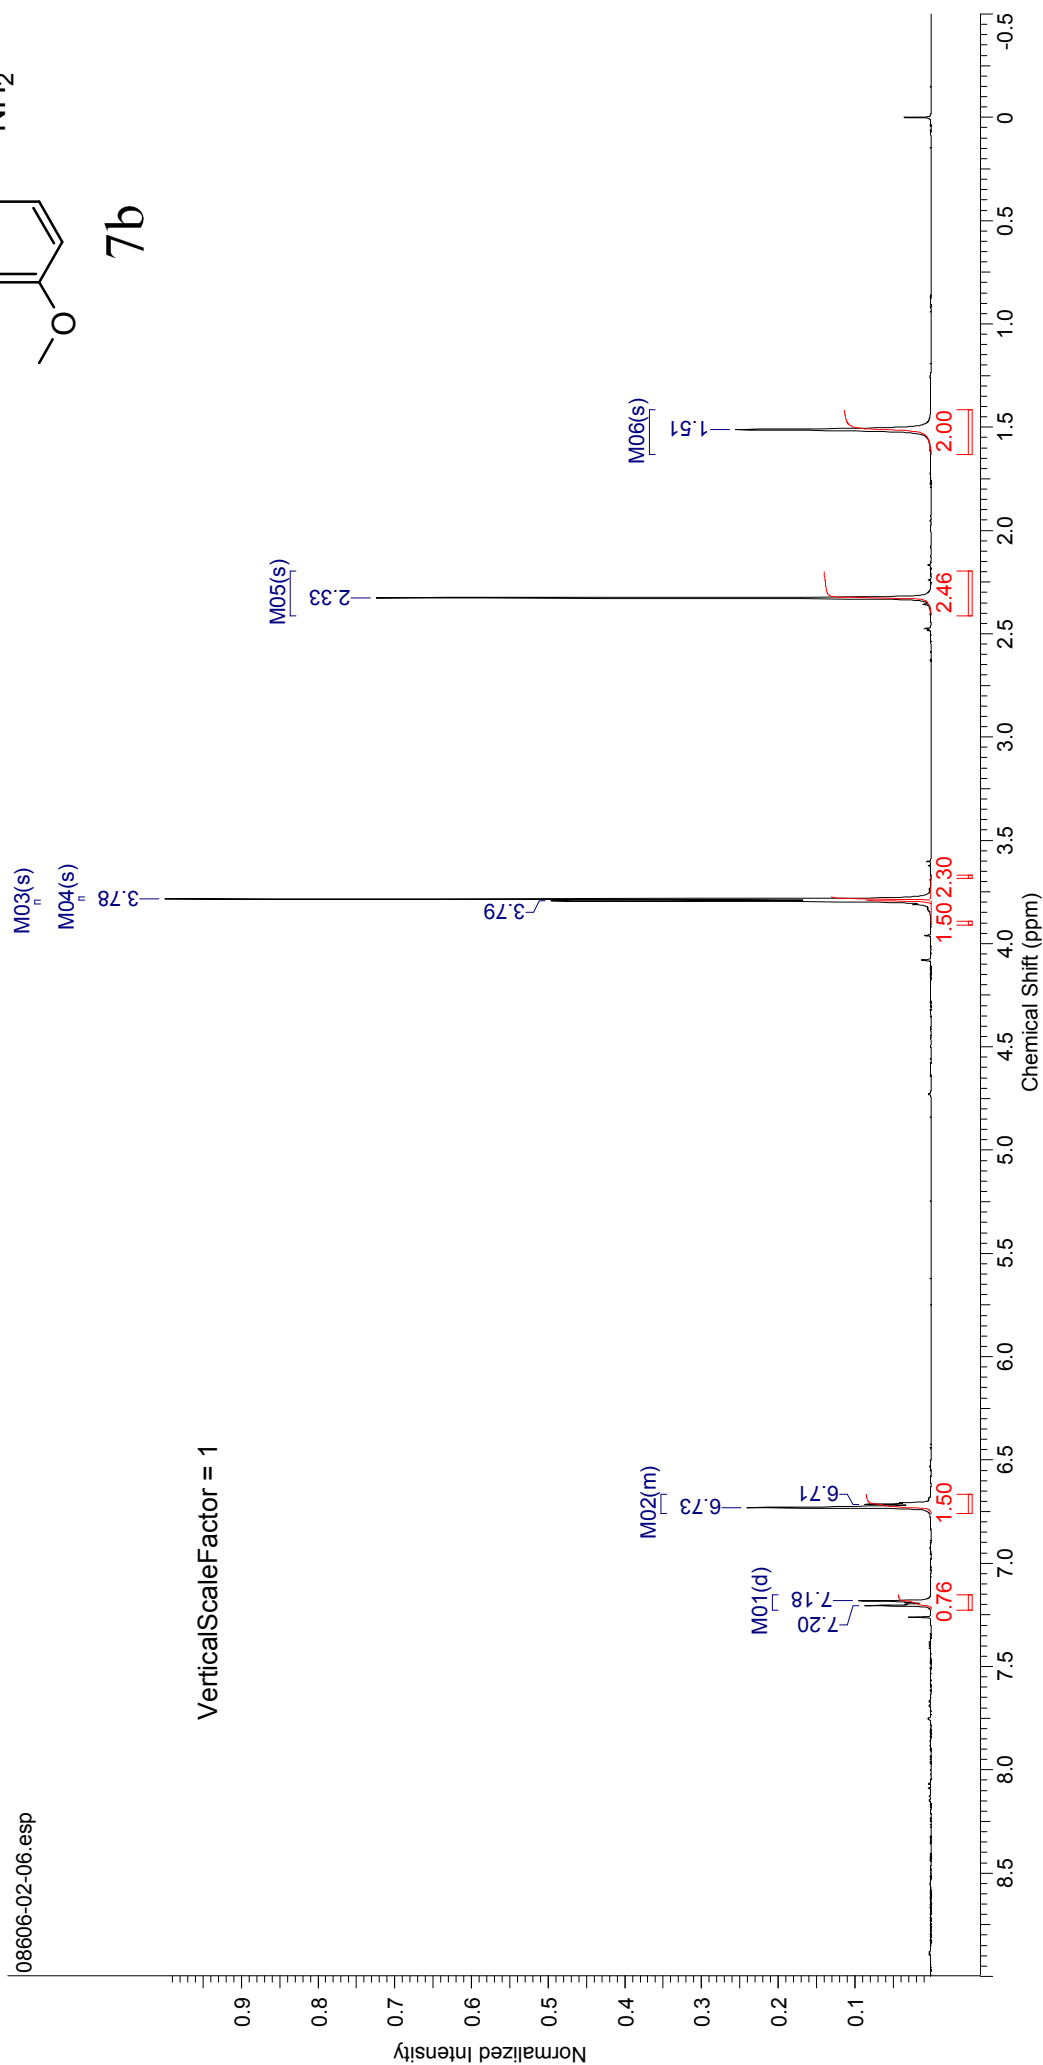

13C OBSERVE

Pulse Sequence: s2pul

Solvent: CDCl3

Ambient temperature

Mercury-400BB "6Fback"

Relax. delay 1.801 sec

Pulse 37.5 degrees

Acq. time 1.199 sec

Width 25000.0 Hz

224 repetitions

OBSERVE C13, 100.5606110 MHz

DECOUPLE H1, 399.9245689 MHz

Power 34 dB

continuously on

WALTZ-16 modulated

DATA PROCESSING

Line broadening 1.0 Hz

FT size 65536

Total time 1 hr, 47 min, 35 sec

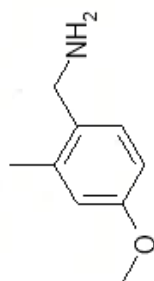

7b

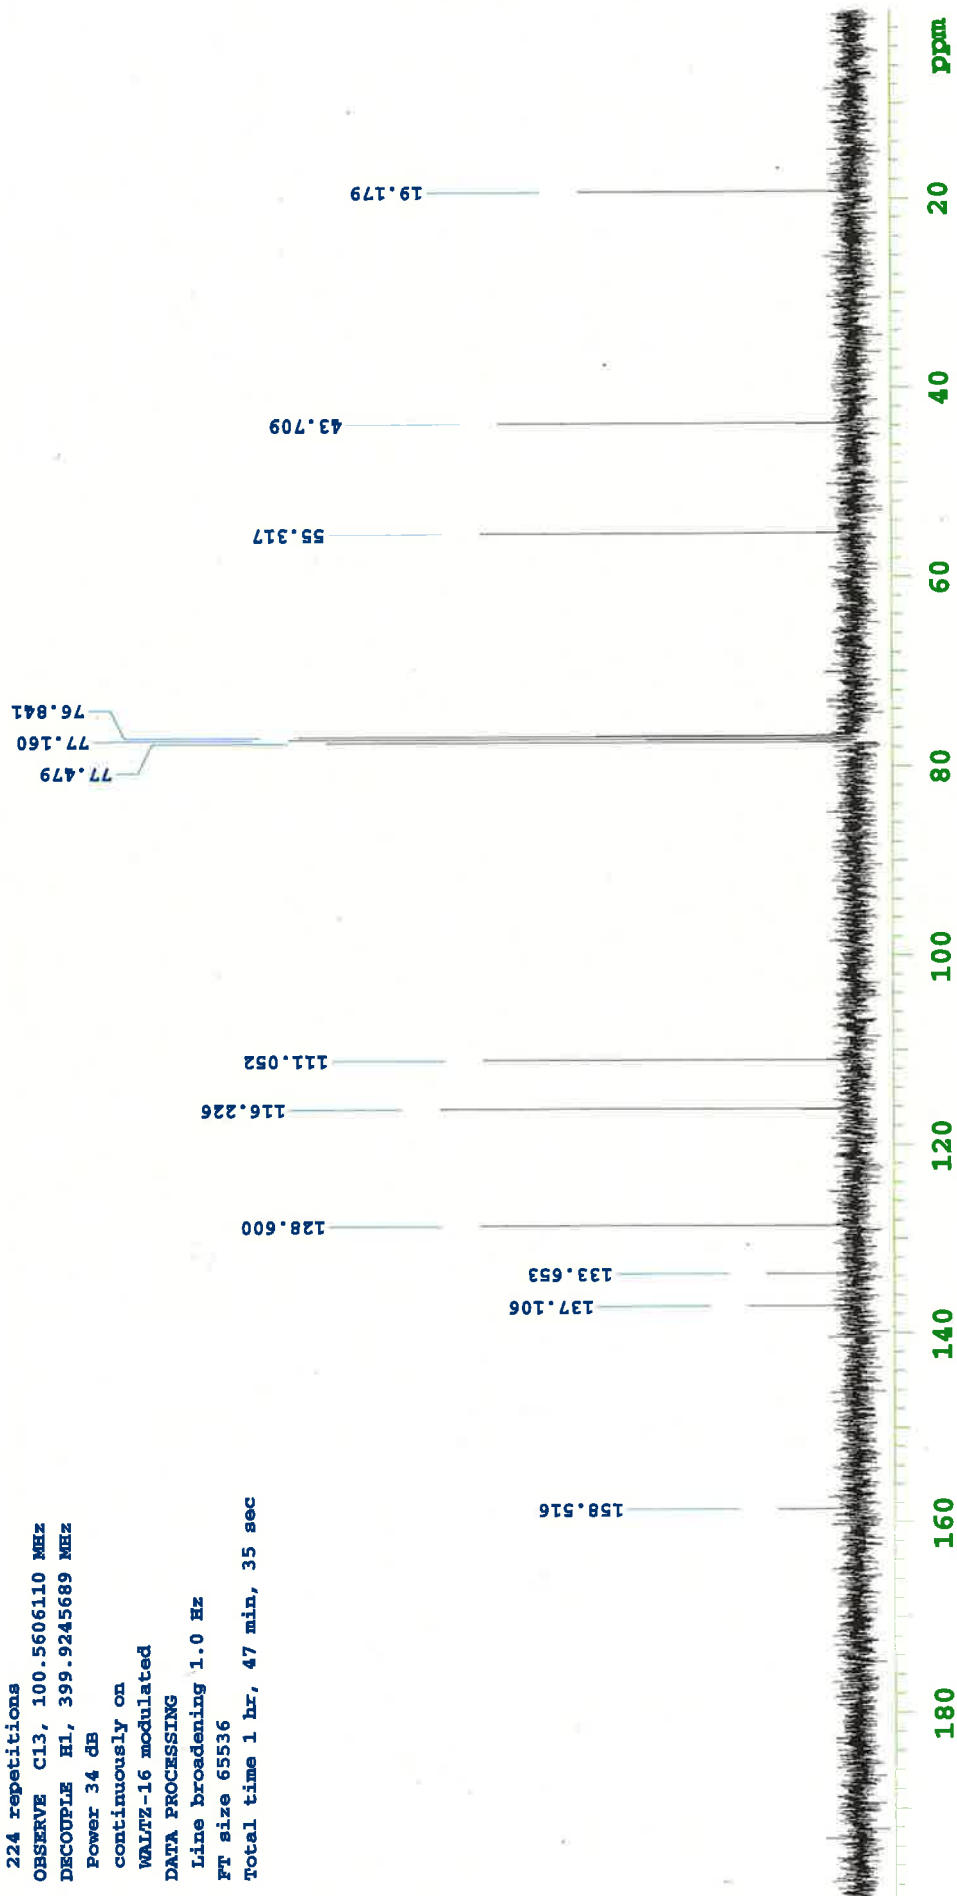

|         |                                               |    |          |
|---------|-----------------------------------------------|----|----------|
| Formula | C <sub>8</sub> H <sub>9</sub> NO <sub>2</sub> | FW | 151.1626 |
|---------|-----------------------------------------------|----|----------|

|                        |                |               |                     |                  |         |                        |                     |             |            |             |
|------------------------|----------------|---------------|---------------------|------------------|---------|------------------------|---------------------|-------------|------------|-------------|
| Acquisition Time (sec) | 2.7320         | Comment       | STANDARD 1H OBSERVE |                  |         |                        |                     |             |            |             |
| File Name              | C:\USR\NMR\FID |               | Frequency (MHz)     | 399.92           | Nucleus | 1H                     | Date                | Feb 25 2012 | Date Stamp | Feb 25 2012 |
| Original Points Count  | 16379          | Points Count  | 16384               | Pulse Sequence   | s2pul   | Solvent                | CHLOROFORM-d        |             |            |             |
| Spectrum Offset (Hz)   | 2247.6414      | Spectrum Type | STANDARD            | Sweep Width (Hz) | 5995.20 | Temperature (degree C) | AMBIENT TEMPERATURE |             |            |             |

<sup>1</sup>H NMR (400 MHz, CHLOROFORM-d) δ 6.79 (s, 1H), 6.70-6.76 (m, 2H), 5.91 (s, 2H), 3.74 (s, 2H), 1.52 (br. s., 2H)

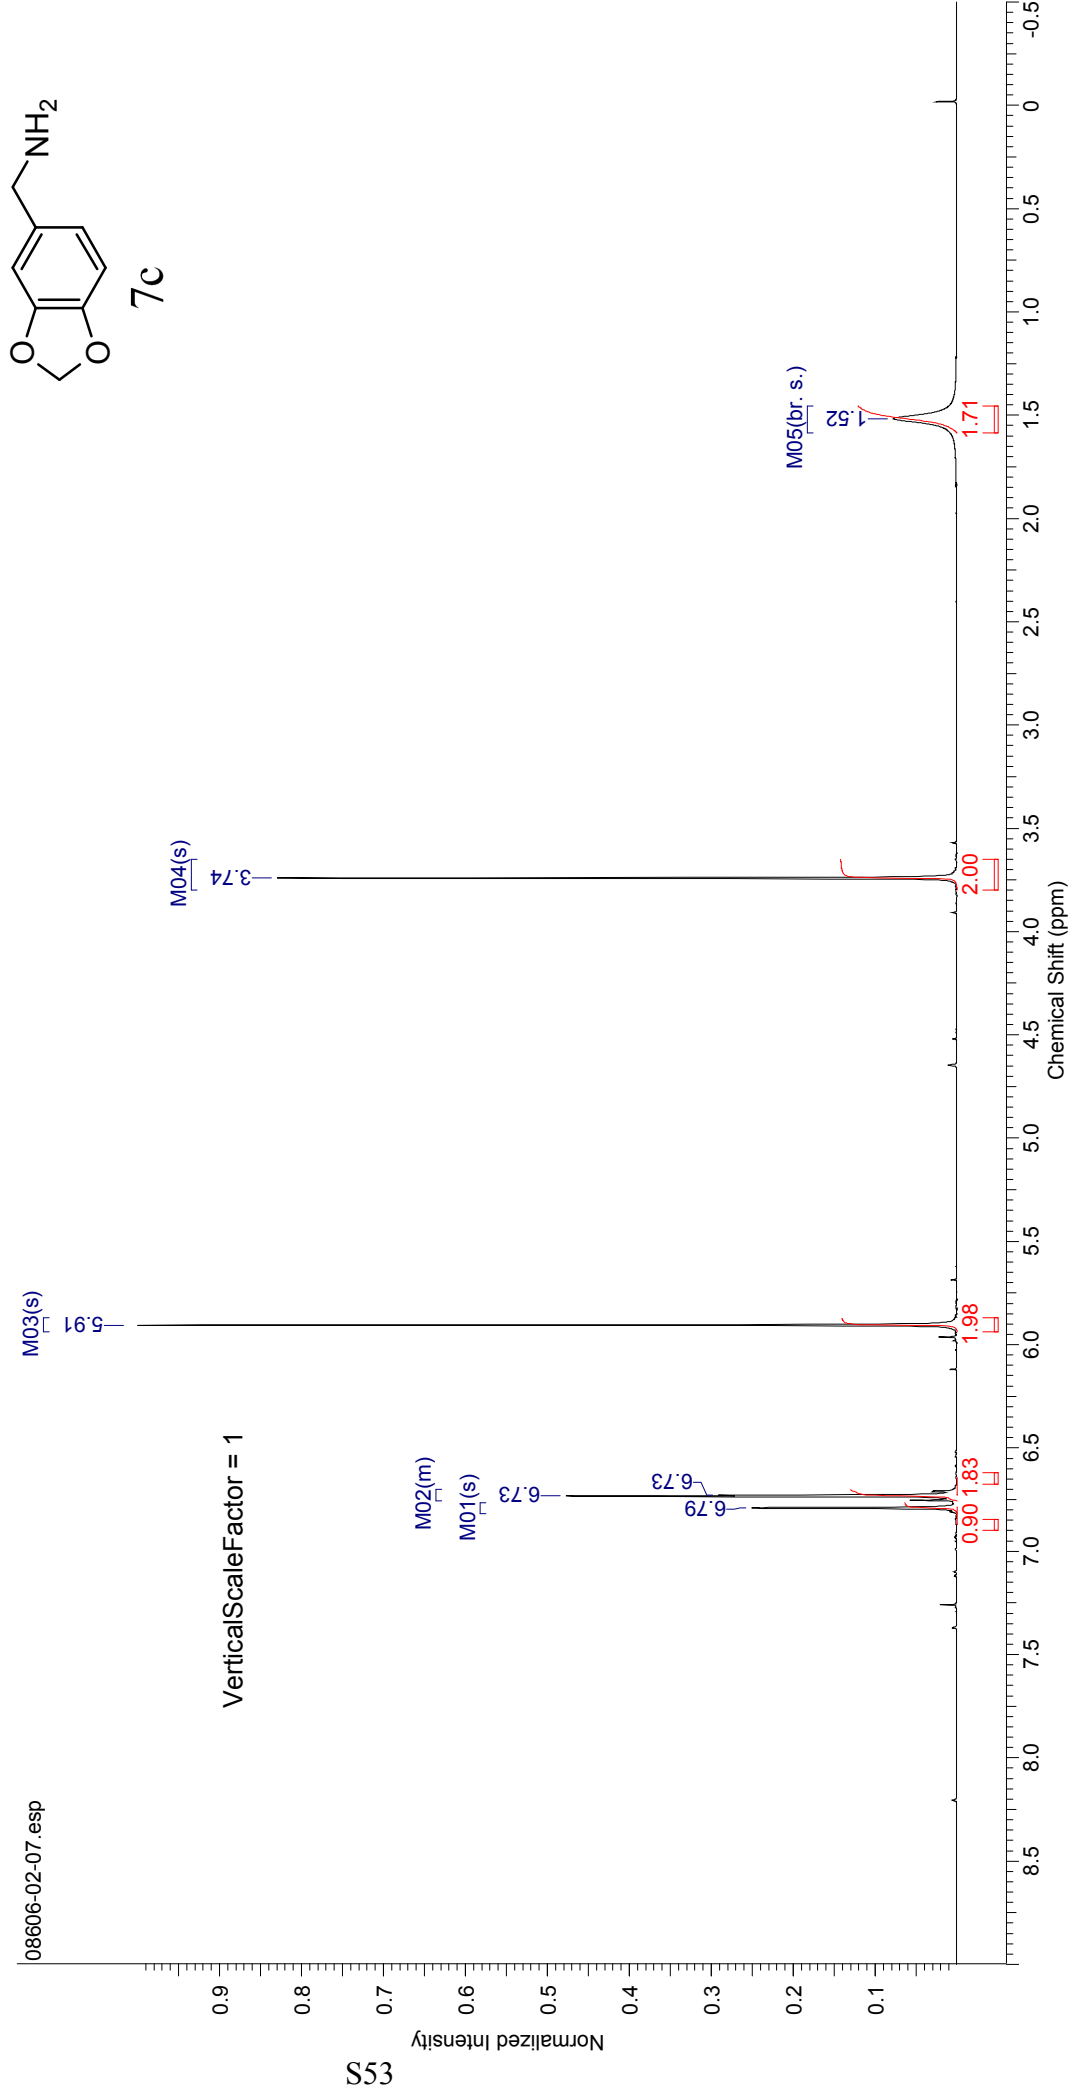

13C OBSERVE

Pulse Sequence: s2pul

Solvent: CDCl3

Ambient temperature

Mercury-400BB "67back"

Relax. delay 1.801 sec

Pulse 37.5 degrees

Acq. time 1.199 sec

Width 25000.0 Hz

192 repetitions

OBSERVE C13, 100.5606171 MHz

DECOUPLE H1, 399.9245689 MHz

Power 34 dB

continuously on

WALTZ-16 modulated

DATA PROCESSING

Line broadening 1.0 Hz

FT size 65536

Total time 1 hr, 47 min, 35 sec

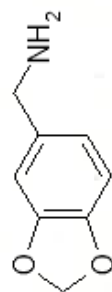

7c

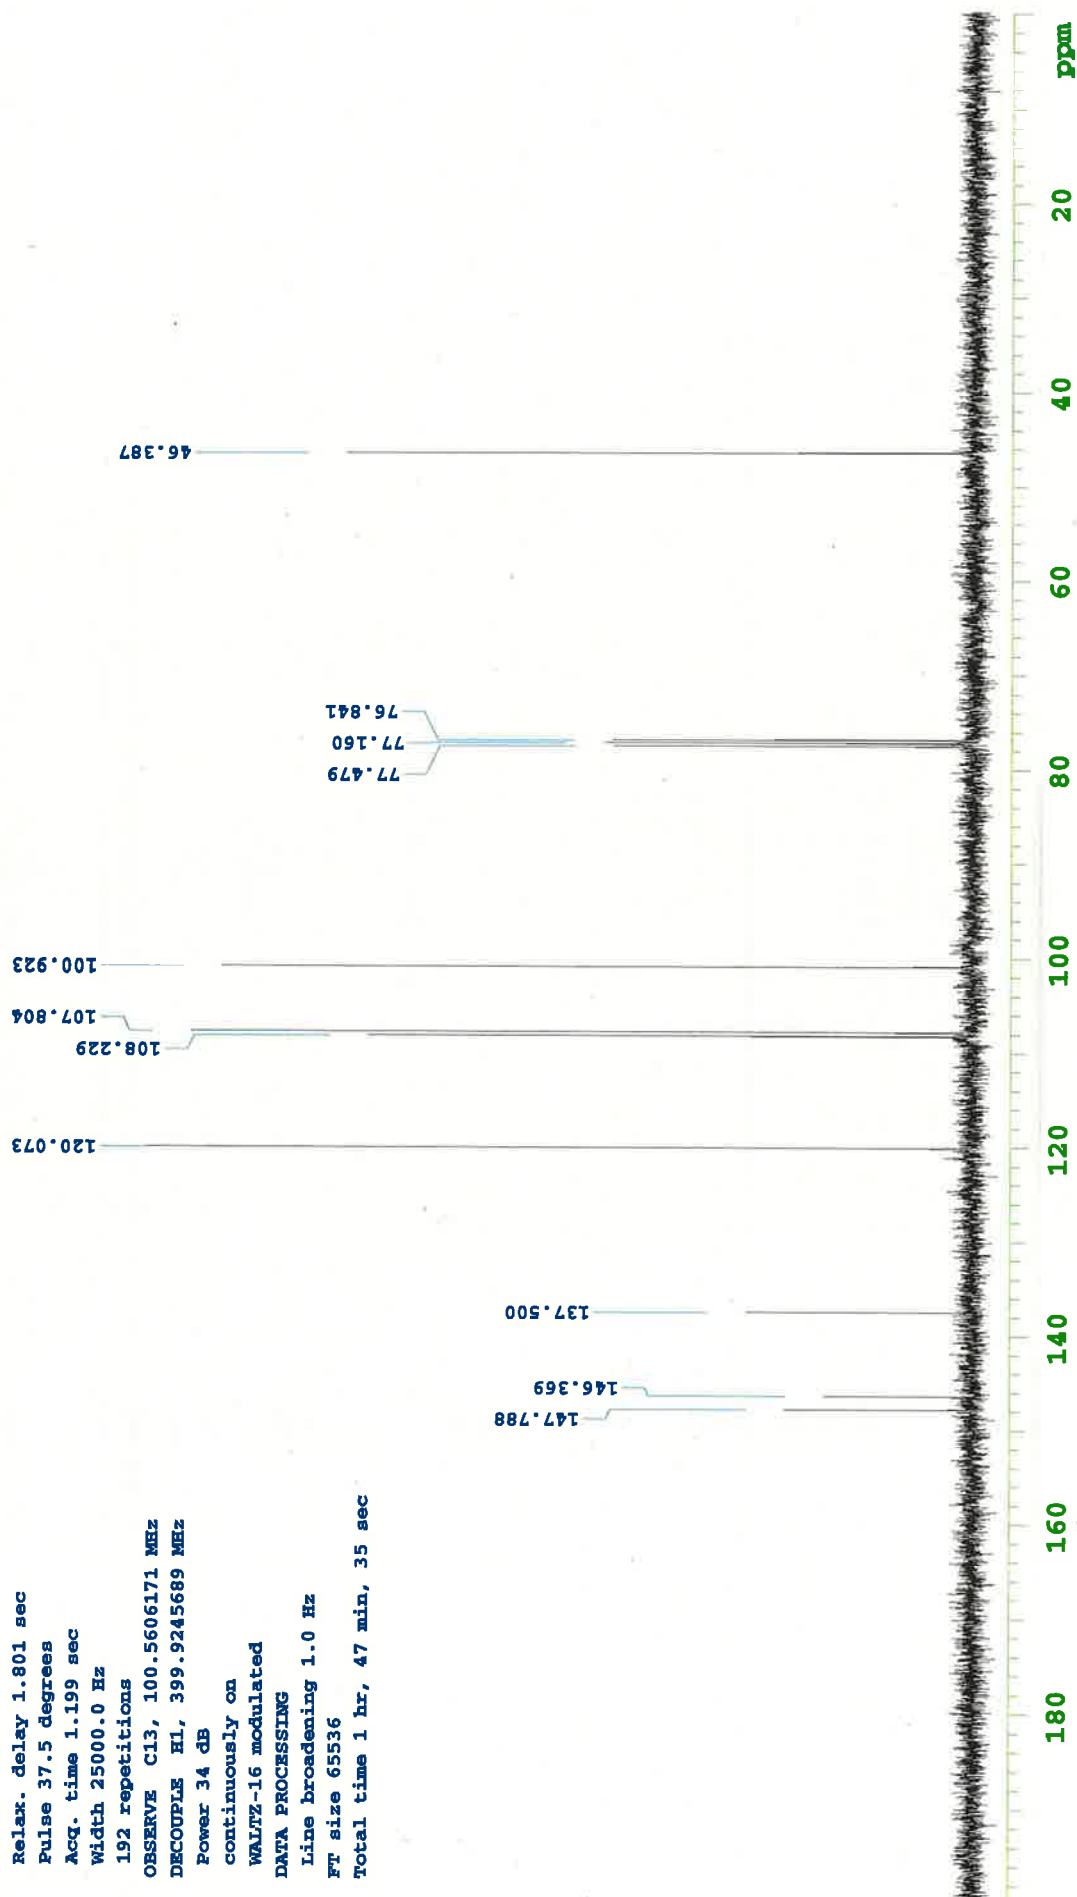

|         |                                                |    |          |
|---------|------------------------------------------------|----|----------|
| Formula | C <sub>9</sub> H <sub>13</sub> NO <sub>2</sub> | FW | 167.2050 |
|---------|------------------------------------------------|----|----------|

|                        |                |               |                     |                  |                        |             |                      |             |
|------------------------|----------------|---------------|---------------------|------------------|------------------------|-------------|----------------------|-------------|
| Acquisition Time (sec) | 2.7320         | Comment       | STANDARD 1H OBSERVE |                  | Date                   | Feb 25 2012 | Date Stamp           | Feb 25 2012 |
| File Name              | C:\USR\NMR\FID |               | Frequency (MHz)     | 399.92           | Nucleus                | 1H          | Number of Transients | 32          |
| Original Points Count  | 16379          | Points Count  | 16384               | Pulse Sequence   | s2pul                  |             |                      |             |
| Spectrum Offset (Hz)   | 2252.5469      | Spectrum Type | STANDARD            | Sweep Width (Hz) | 5995.20                |             |                      |             |
|                        |                |               |                     |                  | Temperature (degree C) |             |                      |             |
|                        |                |               |                     |                  | AMBIENT TEMPERATURE    |             |                      |             |

<sup>1</sup>H NMR (400 MHz, CHLOROFORM-d) δ 6.47 (d, *J*=2.56 Hz, 2H), 6.35 (t, *J*=2.38 Hz, 1H), 3.81 (s, 2H), 3.79 (s, 6H), 1.58 (br. s., 2H)

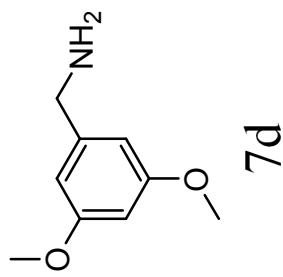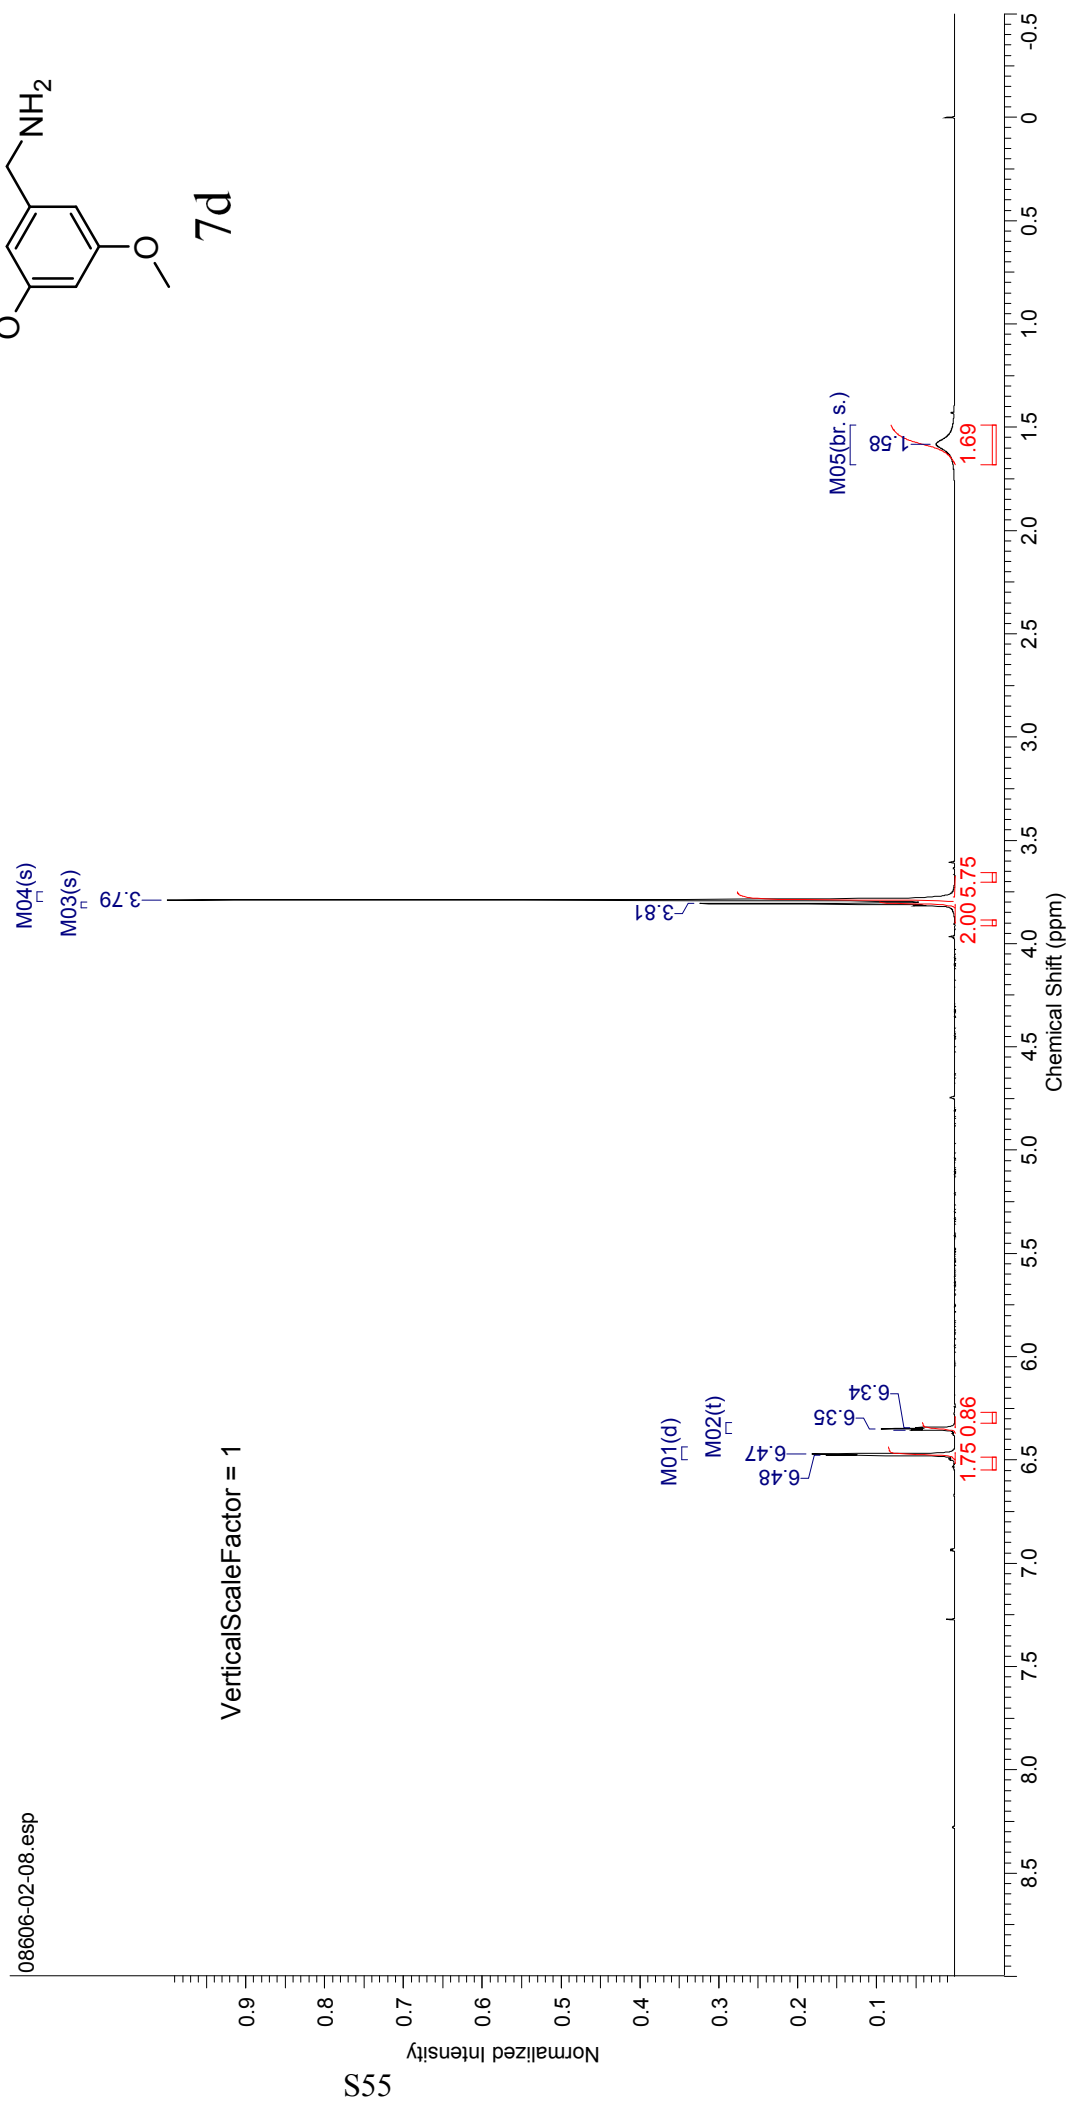

13C OBSERVE

Pulse Sequence: s2pul

Solvent: CDCl3

Ambient temperature

Mercury-400BB "6Fback"

Relax. delay 1.801 sec

Pulse 37.5 degrees

Acq. time 1.199 sec

Width 25000.0 Hz

128 repetitions

OBSERVE C13, 100.5606141 MHz

DECOUPLE H1, 399.9245689 MHz

Power 34 dB

continuously on

WALTZ-16 modulated

DATA PROCESSING

Line broadening 1.0 Hz

FT size 65536

Total time 1 hr, 47 min, 35 sec

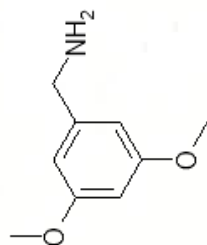

7d

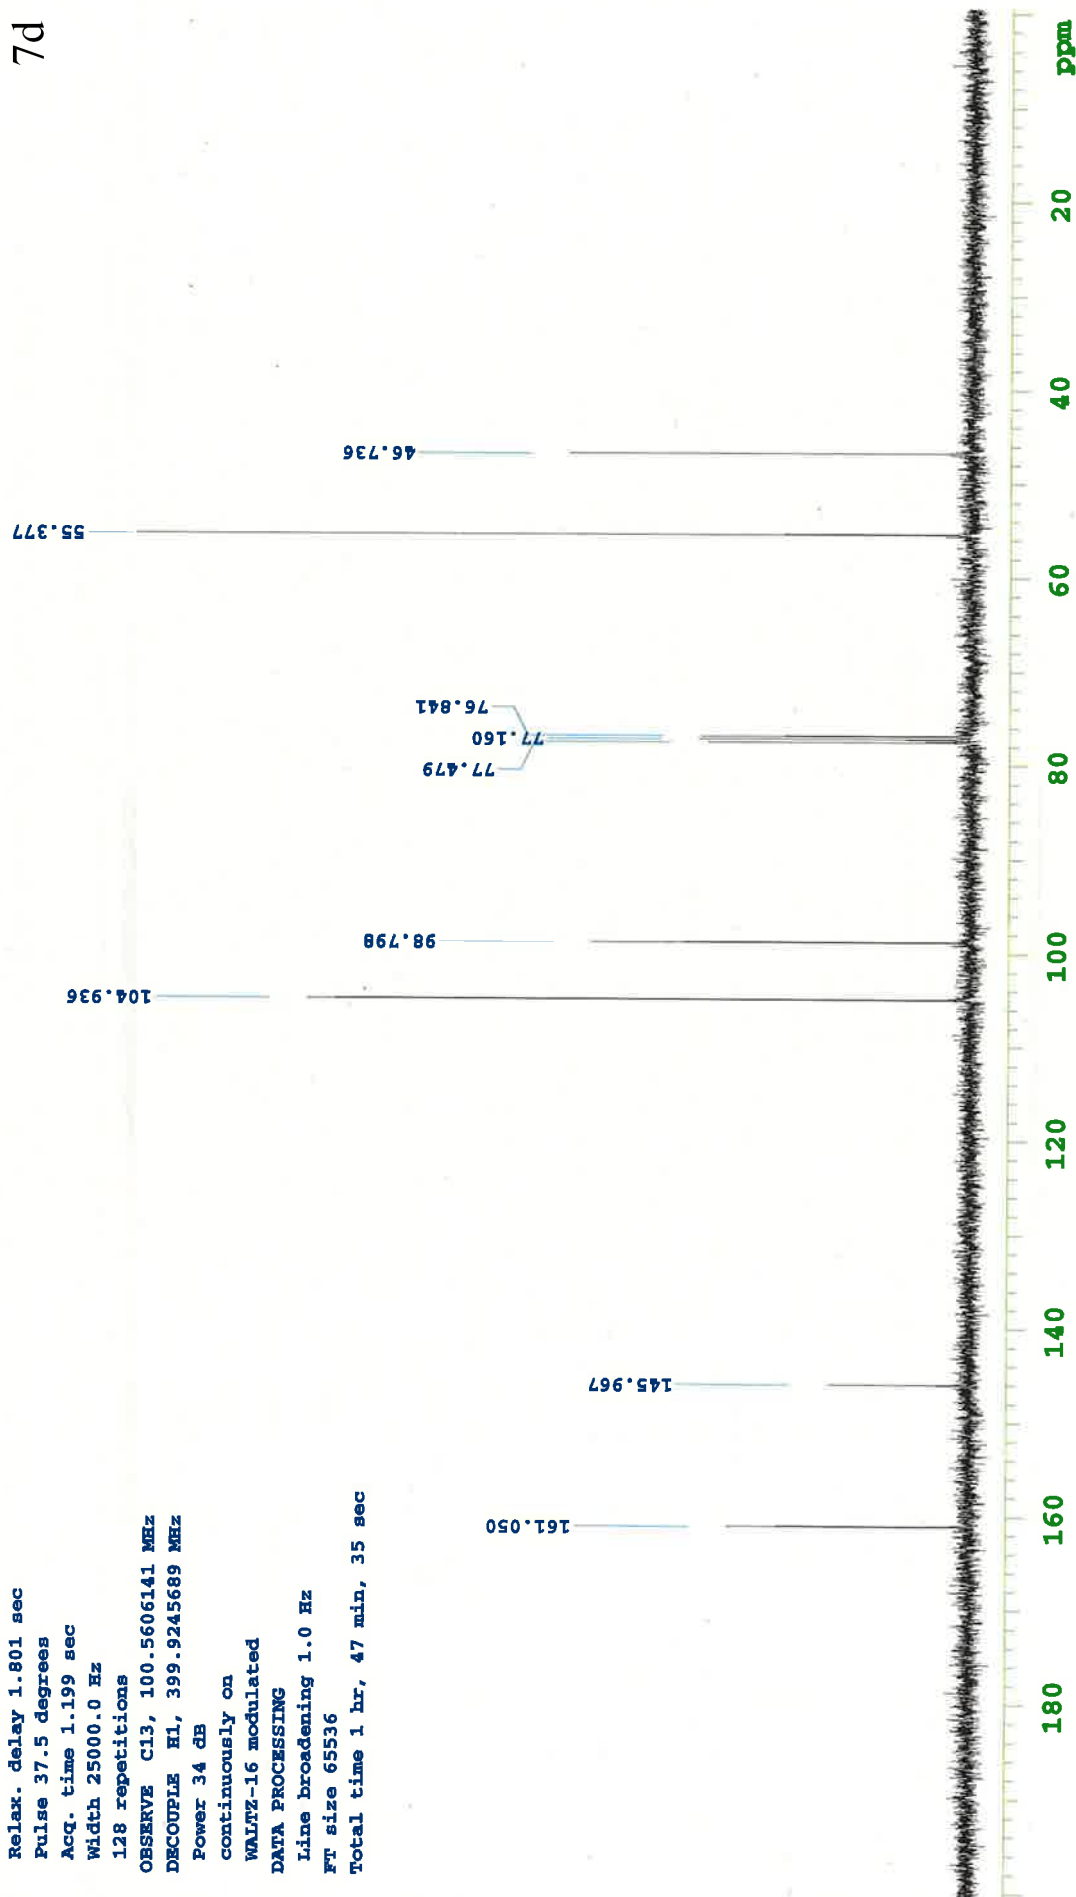

|         |                                              |    |          |
|---------|----------------------------------------------|----|----------|
| Formula | C <sub>8</sub> H <sub>8</sub> N <sub>2</sub> | FW | 132.1625 |
|---------|----------------------------------------------|----|----------|

|                        |                |               |                     |                  |         |                        |                      |             |
|------------------------|----------------|---------------|---------------------|------------------|---------|------------------------|----------------------|-------------|
| Acquisition Time (sec) | 2.7320         | Comment       | STANDARD 1H OBSERVE |                  | Date    | Feb 25 2012            | Date Stamp           | Feb 25 2012 |
| File Name              | C:\USR\NMR\FID |               | Frequency (MHz)     | 399.92           | Nucleus | 1H                     | Number of Transients | 32          |
| Original Points Count  | 16379          | Points Count  | 16384               | Pulse Sequence   | s2pul   | Receiver Gain          | 6.00                 | Solvent     |
| Spectrum Offset (Hz)   | 2263.8911      | Spectrum Type | STANDARD            | Sweep Width (Hz) | 5995.20 | Temperature (degree C) | AMBIENT TEMPERATURE  |             |
| CHLOROFORM-d           |                |               |                     |                  |         |                        |                      |             |

<sup>1</sup>H NMR (400 MHz, CHLOROFORM-d)  $\delta$  7.65 (s, 1H), 7.56 (dd,  $J=7.68, 18.66$  Hz, 2H), 7.40-7.48 (m, 1H), 3.93 (s, 2H), 1.56 (br. s., 2H)

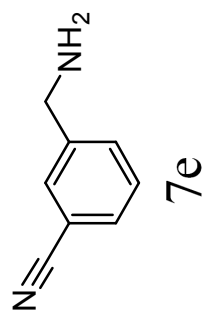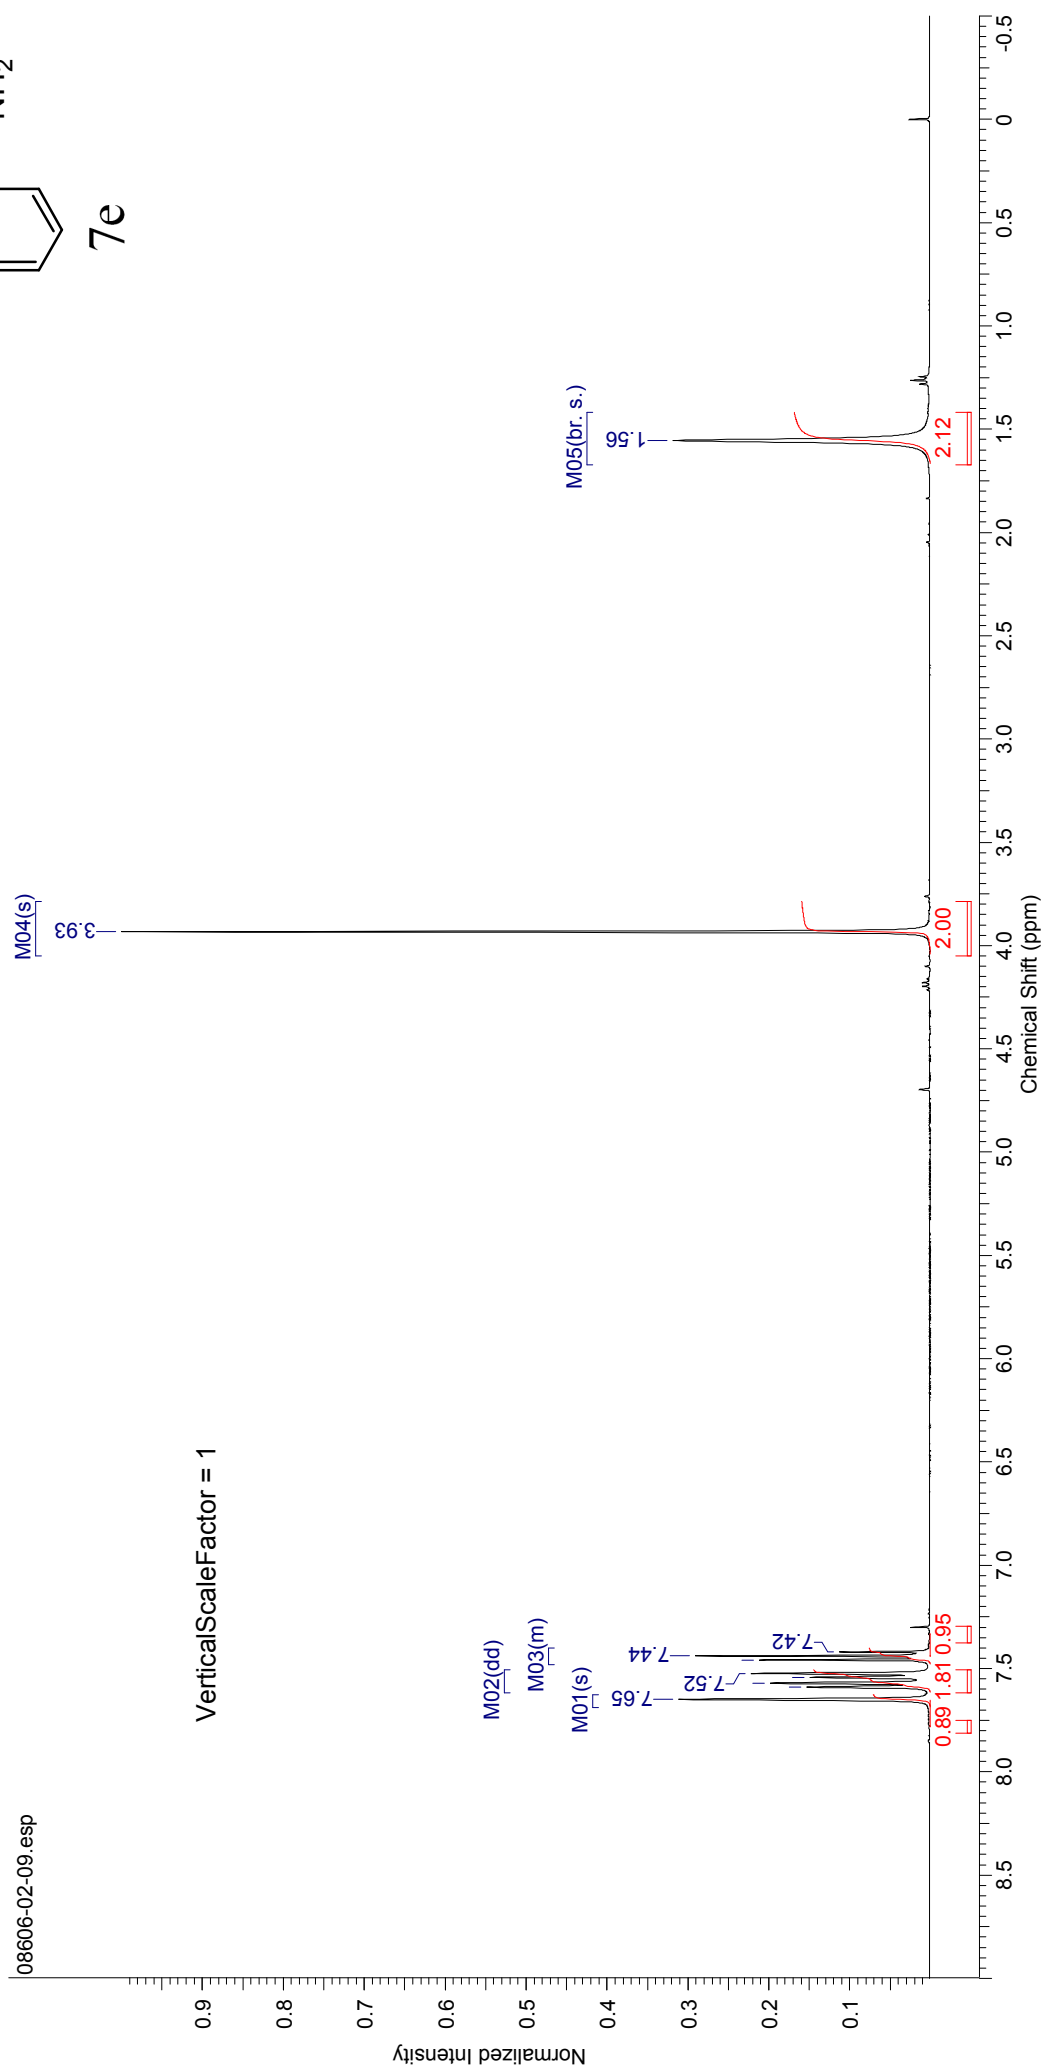

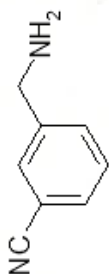

7e

13C OBSERVE

Pulse Sequence: s2pul

Solvent: CDCl3

Ambient temperature

Mercury-400BB "6Fback"

Relax. delay 1.801 sec

Pulse 37.5 degrees

Acq. time 1.199 sec

Width 25000.0 Hz

352 repetitions

OBSERVE C13, 100.5606194 MHz

DECOUPLE H1, 399.9245689 MHz

Power 34 dB

continuously on

WALTZ-16 modulated

DATA PROCESSING

Line broadening 1.0 Hz

FT size 65536

Total time 1 hr, 47 min, 35 sec

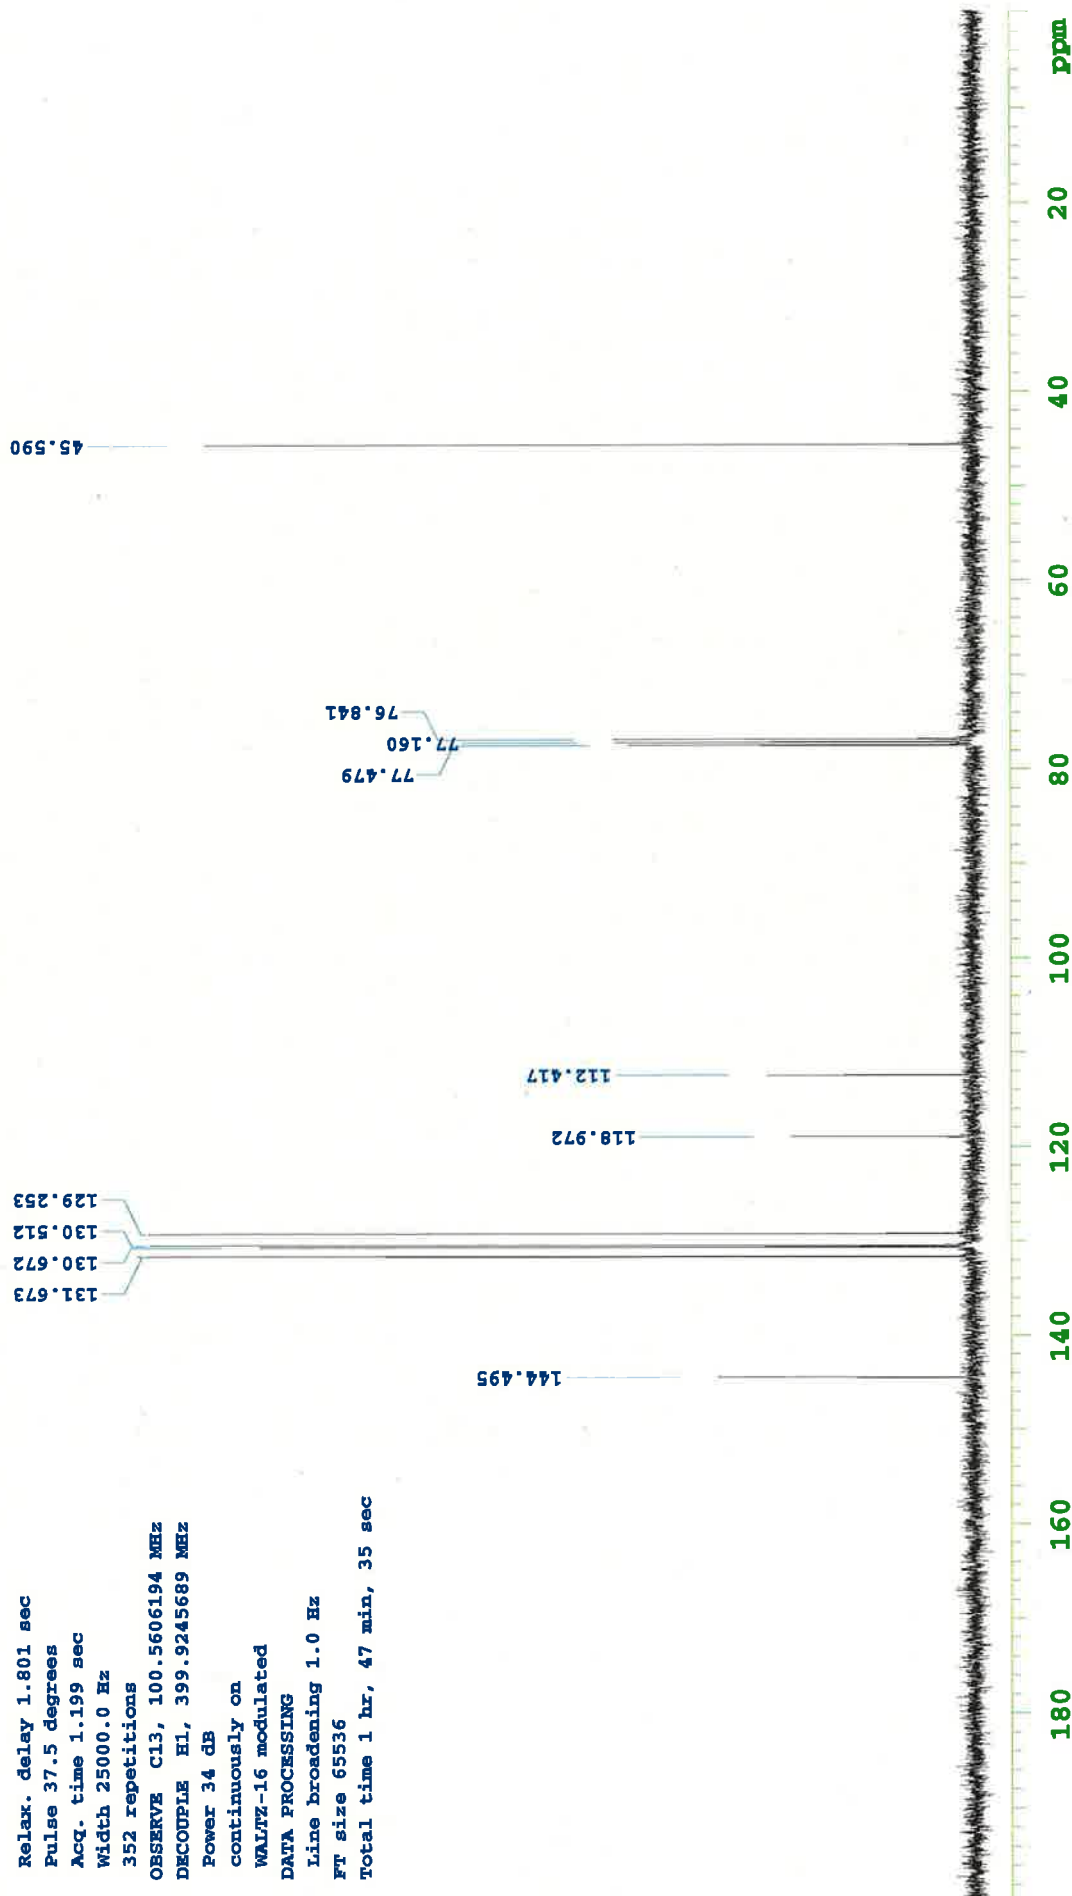

|                        |                 |               |                     |                        |                     |                      |              |
|------------------------|-----------------|---------------|---------------------|------------------------|---------------------|----------------------|--------------|
| Acquisition Time (sec) | 2.7320          | Comment       | STANDARD 1H OBSERVE | Date                   | Mar 20 2012         | Date Stamp           | Mar 20 2012  |
| File Name              | C:\USRX\NMR\FID |               | Frequency (MHz)     | Nucleus                | 1H                  | Number of Transients | 32           |
| Original Points Count  | 16379           | Points Count  | Pulse Sequence      | Receiver Gain          | 10.00               | Solvent              | CHLOROFORM-d |
| Spectrum Offset (Hz)   | 2259.4998       | Spectrum Type | Sweep Width (Hz)    | Temperature (degree C) | AMBIENT TEMPERATURE |                      |              |

<sup>1</sup>H NMR (400 MHz, CHLOROFORM-d)  $\delta$  8.22 (s, 1H), 8.10 (dd,  $J$ =1.28, 8.23 Hz, 1H), 7.68 (d,  $J$ =7.68 Hz, 1H), 7.51 (t,  $J$ =7.87 Hz, 1H), 4.01 (s, 2H), 1.59 (s, 2H)

VerticalScaleFactor = 1

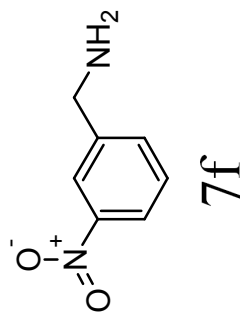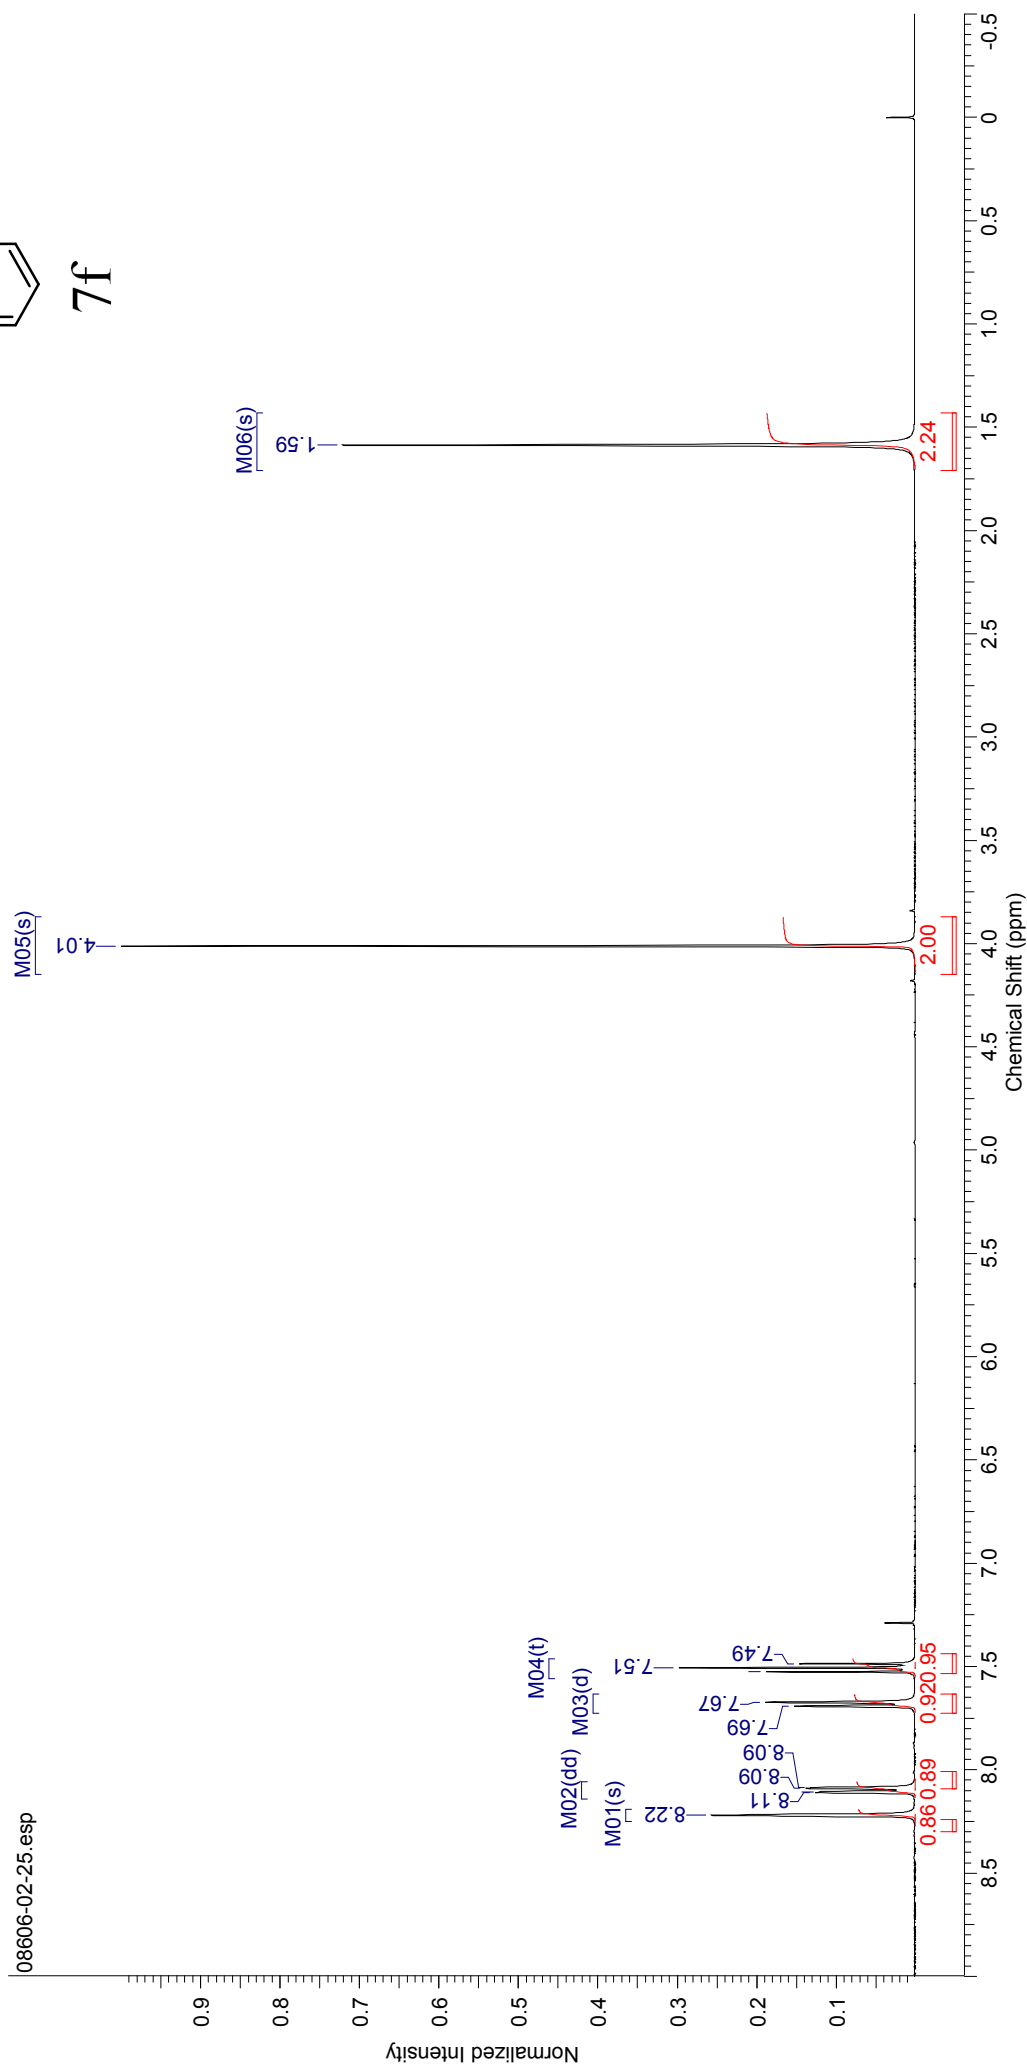

13C OBSERVE

Pulse Sequence: s2pul

Solvent: CDCl3

Ambient temperature

Mercury-400BB "6Fback"

Relax. delay 1.801 sec

Pulse 37.5 degrees

Acq. time 1.199 sec

Width 25000.0 Hz

256 repetitions

OBSERVE C13, 100.5606126 MHz

DECOUPLE H1, 399.9245689 MHz

Power 34 dB

continuously on

WALTZ-16 modulated

DATA PROCESSING

Line broadening 1.0 Hz

FT size 65536

Total time 7 hr, 26 min, 4 sec

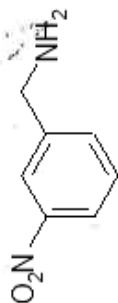

7f

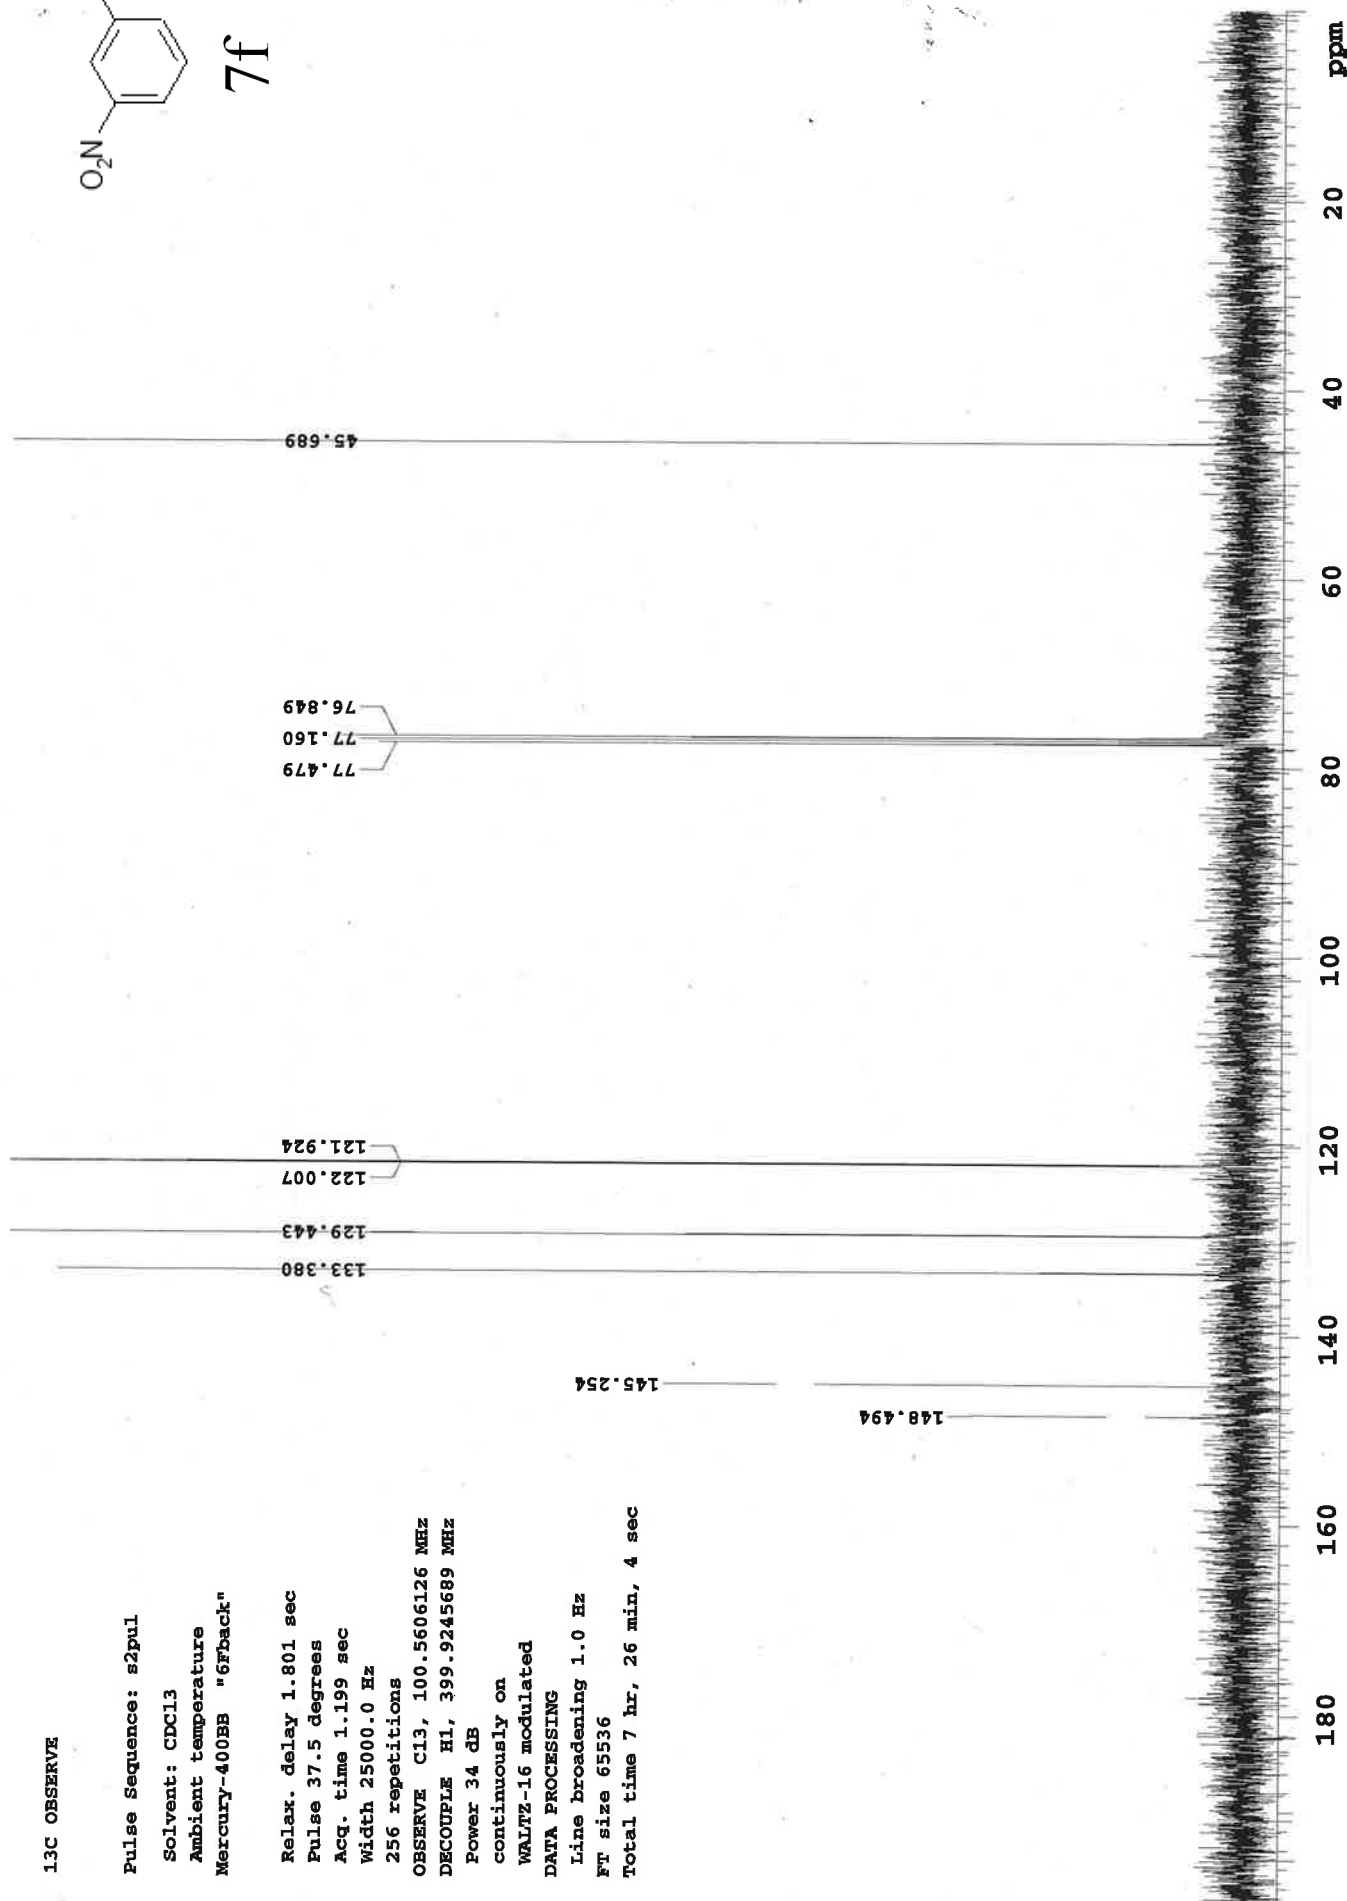

DFILE NOM123054.1  
 COMNT single\_pulse  
 DATIM 2012-03-05 14:34:31  
 OBNUC 1H  
 EXMOD single\_pulse.ex2  
 OBFRQ 490.15 MHz  
 OBSET 9.16 KHz  
 OBFIN 7.60 Hz  
 POINT 16384  
 FREQU 9191.18 Hz  
 SCANS 8  
 ACQTM 1.7826 sec  
 PD 3.0000 sec  
 PW1 8.55 usec  
 IRNUC 1H  
 CTENP 24.1 C  
 SLVNT CDCL3  
 EXREF 0.00 ppm  
 BF 0.12 Hz  
 RGAIN 40

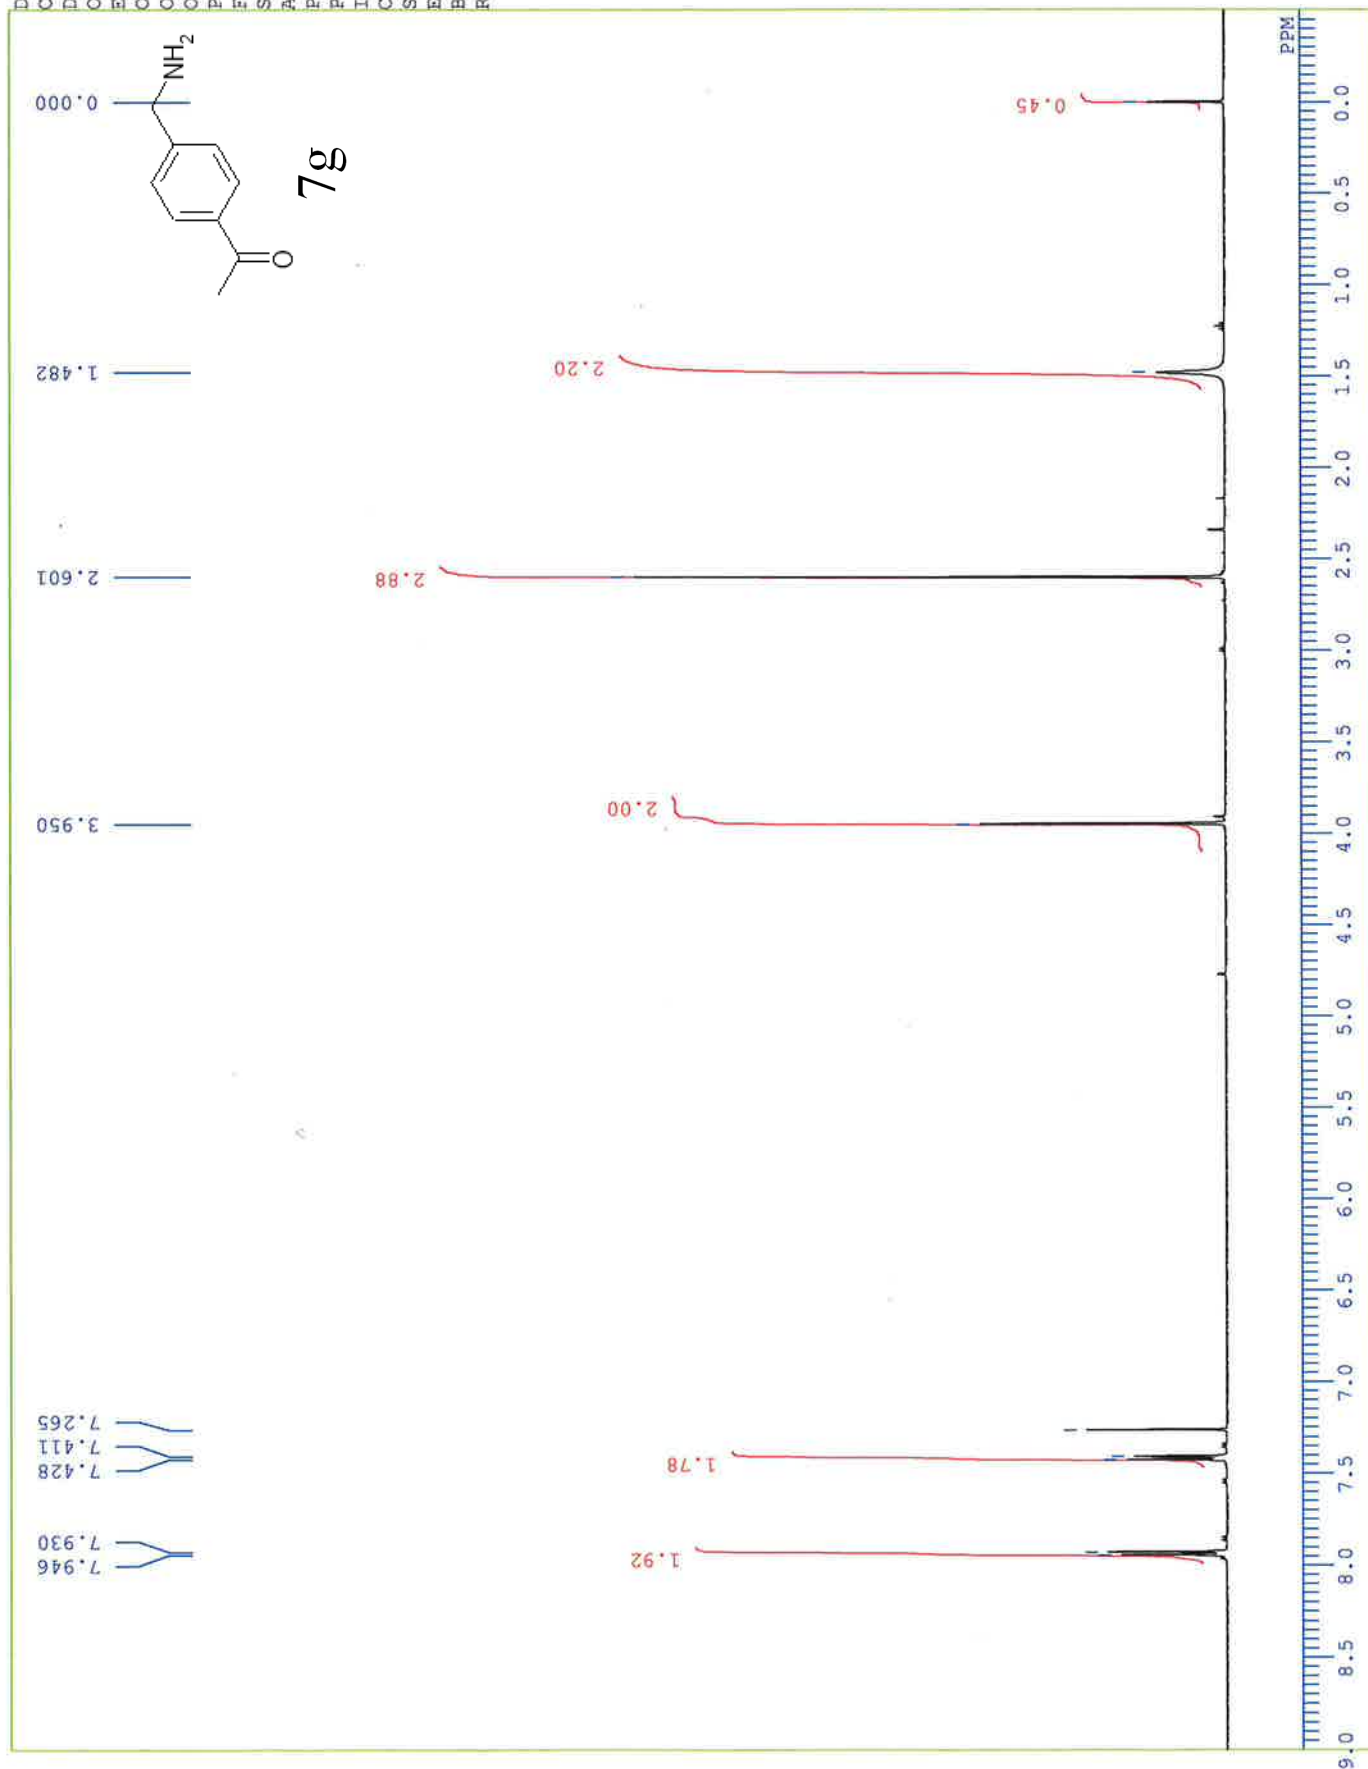

DFILE  
 COMNT  
 DATIM  
 OBNUC  
 EXMOD  
 OBFRQ  
 OBSET  
 OBFIN  
 POINT  
 FREQU  
 SCANS  
 ACQTM  
 PD  
 PW1  
 IRNUC  
 CTEMP  
 SLVNT  
 EXREF  
 BF  
 RGAIN

NOM123247.1  
 single pulse decoupl.  
 2012-03-24 09:24:25  
 13C  
 single pulse dec  
 123.26 MHz  
 2.31 KHz  
 6.71 Hz  
 32768  
 38580.25 Hz  
 2048  
 0.8493 sec  
 2.0000 sec  
 3.20 usec  
 1H  
 24.8 C  
 CDCL3  
 77.16 ppm  
 0.12 Hz  
 50

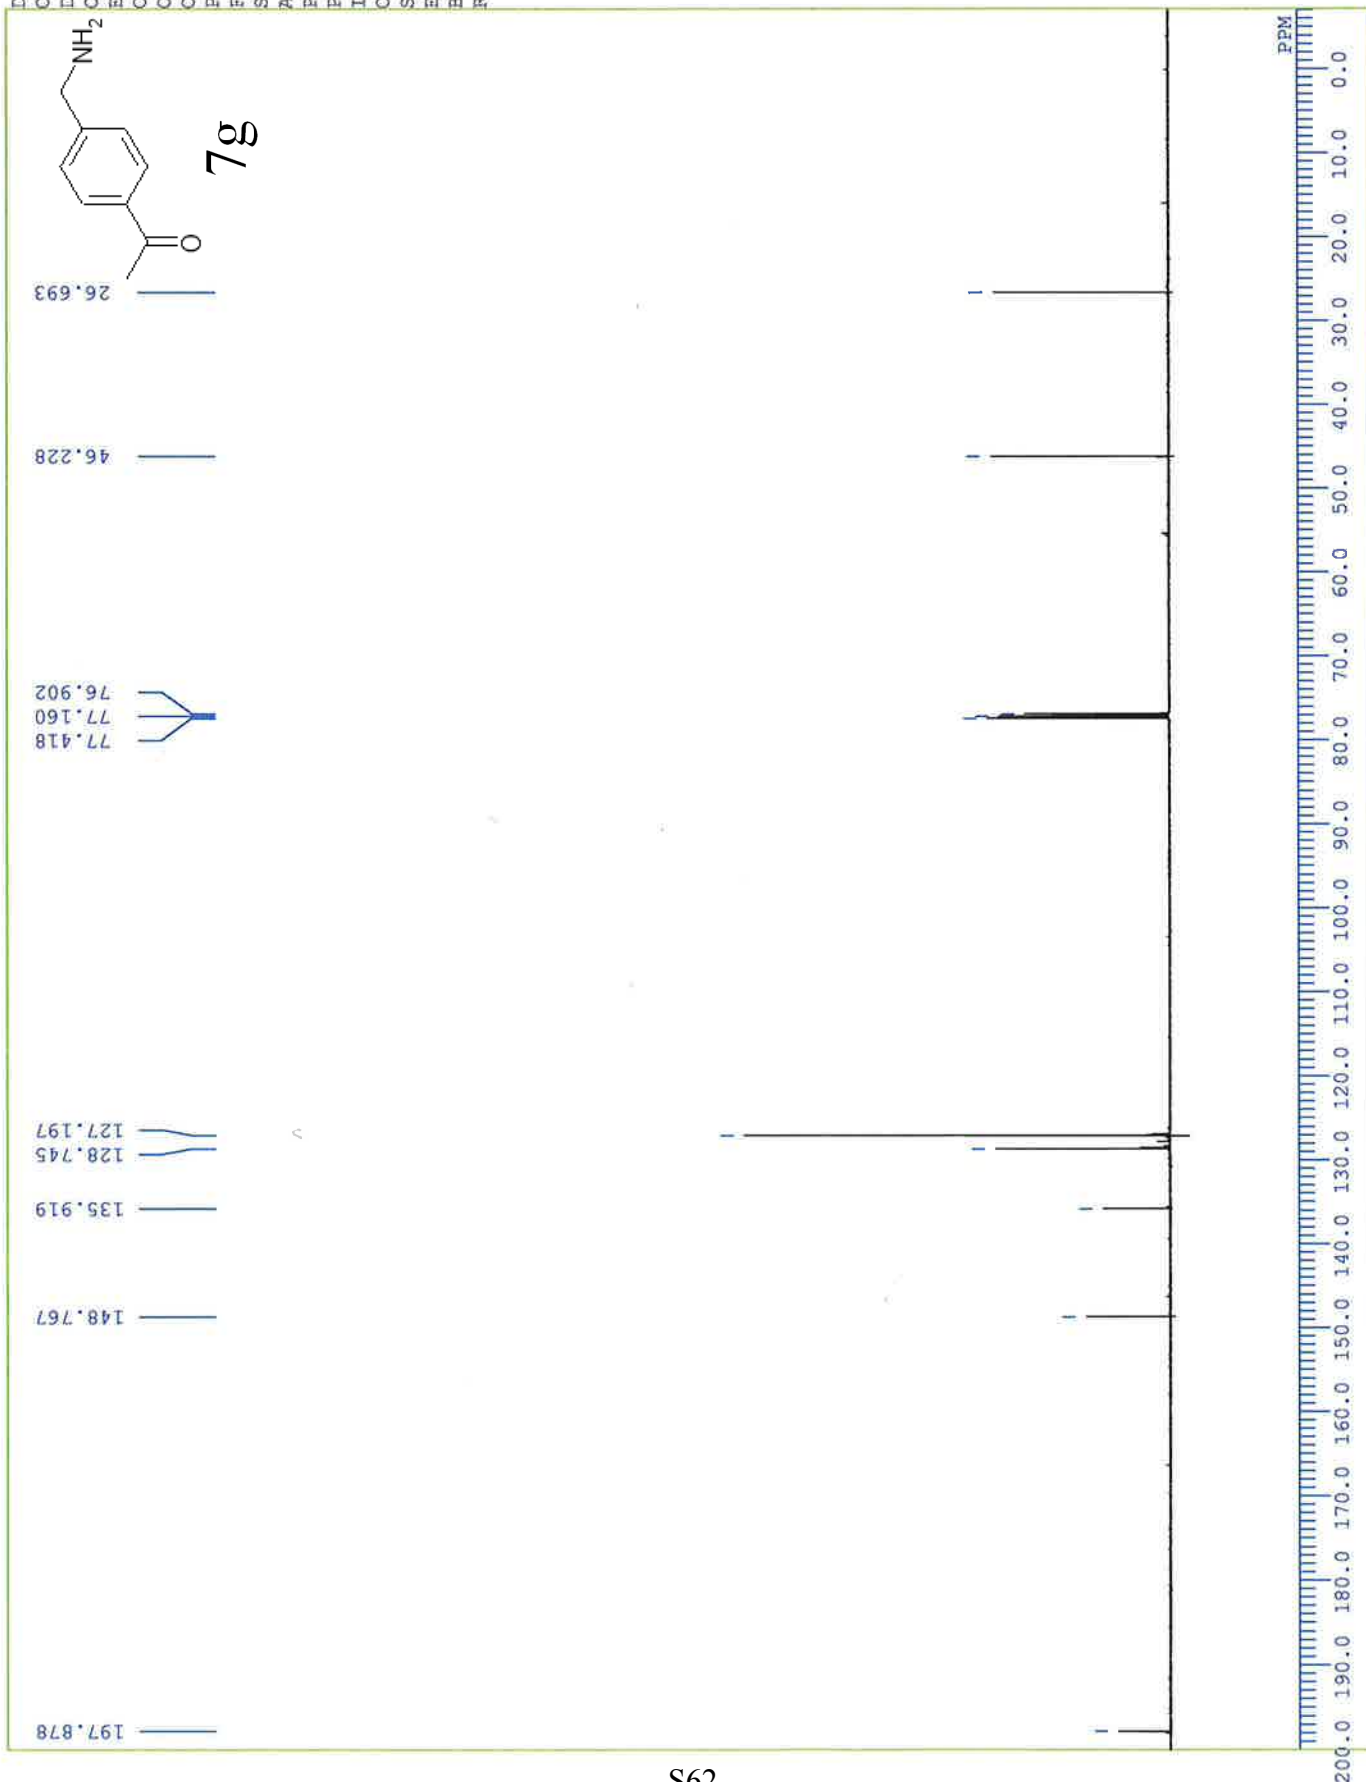

|         |                                                |    |          |
|---------|------------------------------------------------|----|----------|
| Formula | C <sub>9</sub> H <sub>11</sub> NO <sub>2</sub> | FW | 165.1891 |
|---------|------------------------------------------------|----|----------|

|                        |                |               |                     |                  |         |                        |                      |             |              |             |
|------------------------|----------------|---------------|---------------------|------------------|---------|------------------------|----------------------|-------------|--------------|-------------|
| Acquisition Time (sec) | 2.7320         | Comment       | STANDARD 1H OBSERVE |                  |         |                        | Date                 | Feb 25 2012 | Date Stamp   | Feb 25 2012 |
| File Name              | C:\USR\NMR\FID |               | Frequency (MHz)     | 399.92           | Nucleus | 1H                     | Number of Transients | 32          |              |             |
| Original Points Count  | 16379          | Points Count  | 16384               | Pulse Sequence   | s2pul   | Receiver Gain          | 10.00                | Solvent     | CHLOROFORM-d |             |
| Spectrum Offset (Hz)   | 2255.1084      | Spectrum Type | STANDARD            | Sweep Width (Hz) | 5995.20 | Temperature (degree C) | AMBIENT TEMPERATURE  |             |              |             |

<sup>1</sup>H NMR (400 MHz, CHLOROFORM-d) δ 8.01 (d, *J*=8.05 Hz, 2H), 7.39 (d, *J*=8.05 Hz, 2H), 3.94 (s, 3H), 3.91 (s, 3H), 1.54 (s, 2H)

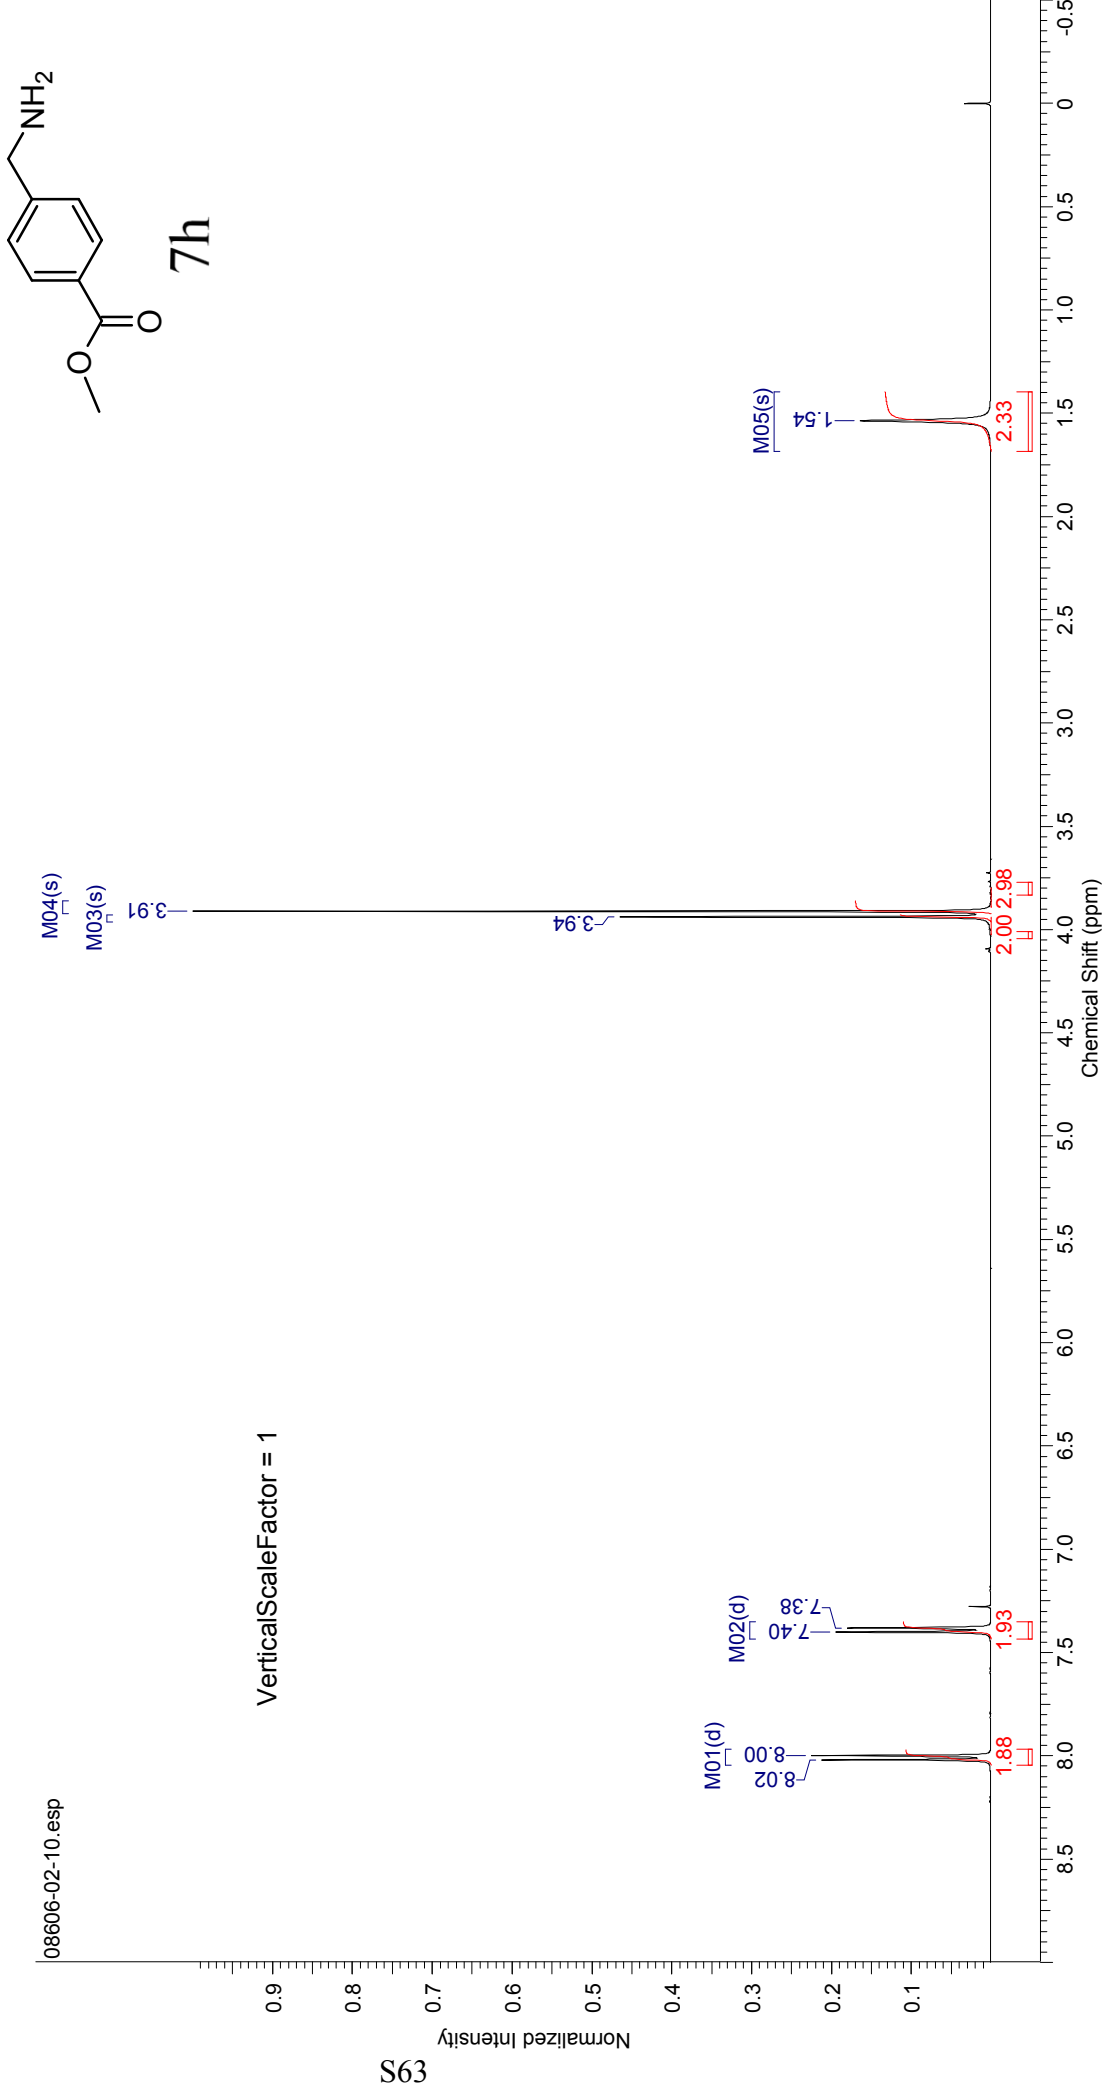

13C OBSERVE

Pulse Sequence: s2pul

Solvent: CDC13

Ambient temperature

Mercury-400BB "6Fback"

Relax. delay 1.801 sec

Pulse 37.5 degrees

Acq. time 1.199 sec

Width 25000.0 Hz

256 repetitions

OBSERVE C13, 100.5606110 MHz

DECOUPLE H1, 399.9245689 MHz

Power 34 dB

continuously on

WALTZ-16 modulated

DATA PROCESSING

Line broadening 1.0 Hz

FT size 65536

Total time 1 hr, 47 min, 35 sec

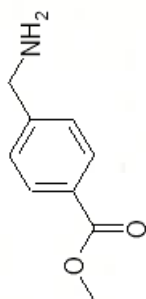

7h

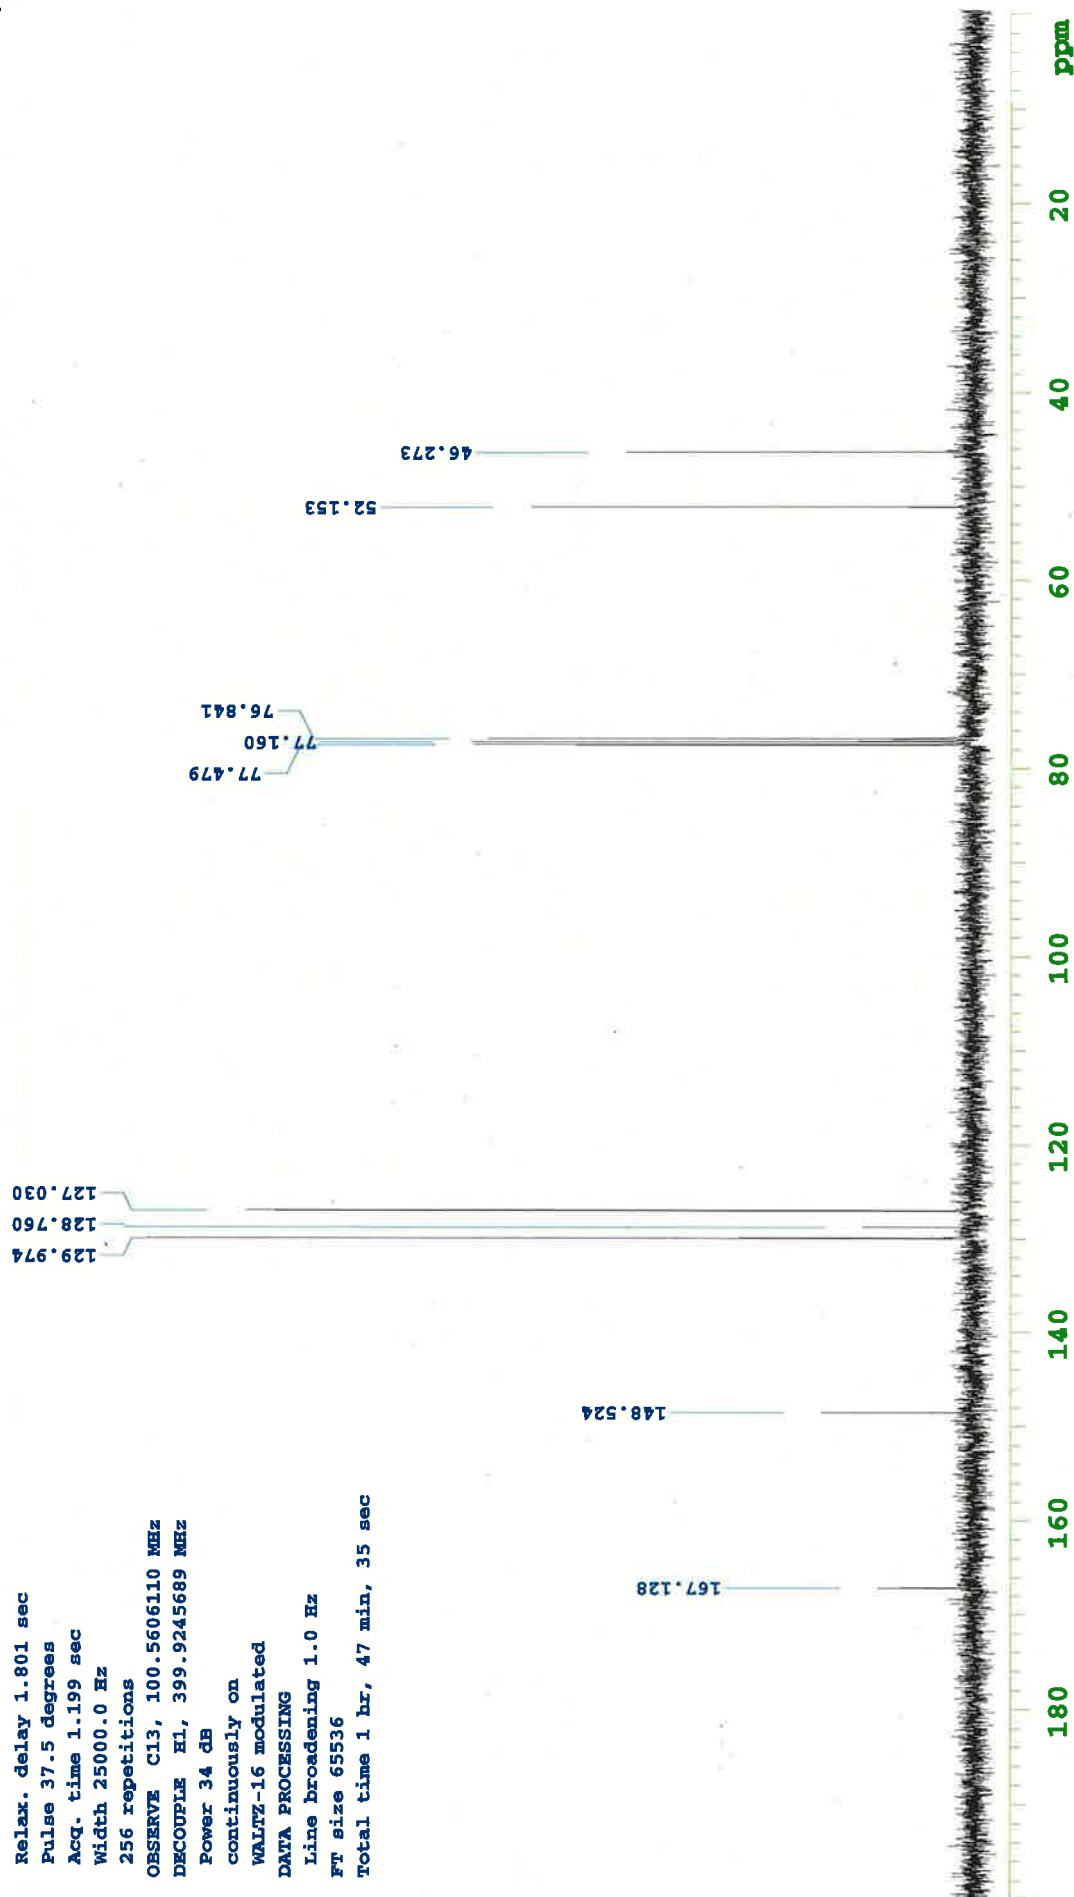

|         |                                                |    |          |
|---------|------------------------------------------------|----|----------|
| Formula | C <sub>10</sub> H <sub>10</sub> N <sub>2</sub> | FW | 158.1998 |
|---------|------------------------------------------------|----|----------|

|                        |                |               |                     |                        |              |                      |             |
|------------------------|----------------|---------------|---------------------|------------------------|--------------|----------------------|-------------|
| Acquisition Time (sec) | 2.7320         | Comment       | STANDARD 1H OBSERVE | Date                   | Feb 25 2012  | Date Stamp           | Feb 25 2012 |
| File Name              | C:\USR\NMR\FID |               |                     | Nucleus                | 1H           | Number of Transients | 32          |
| Original Points Count  | 16379          | Points Count  | 16384               | Solvent                | CHLOROFORM-d |                      |             |
| Spectrum Offset (Hz)   | 2274.1375      | Spectrum Type | STANDARD            | Temperature (degree C) | AMBIENT      | TEMPERATURE          |             |

<sup>1</sup>H NMR (400 MHz, CHLOROFORM-d) δ 8.87 (dd, *J*=1.65, 4.21 Hz, 1H), 8.02-8.14 (m, 2H), 7.71 (s, 1H), 7.65 (dd, *J*=2.01, 8.60 Hz, 1H), 7.36 (dd, *J*=4.21, 8.23 Hz, 1H), 4.04 (s, 2H), 1.69 (br. s., 2H)

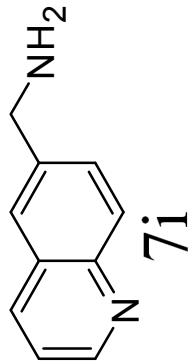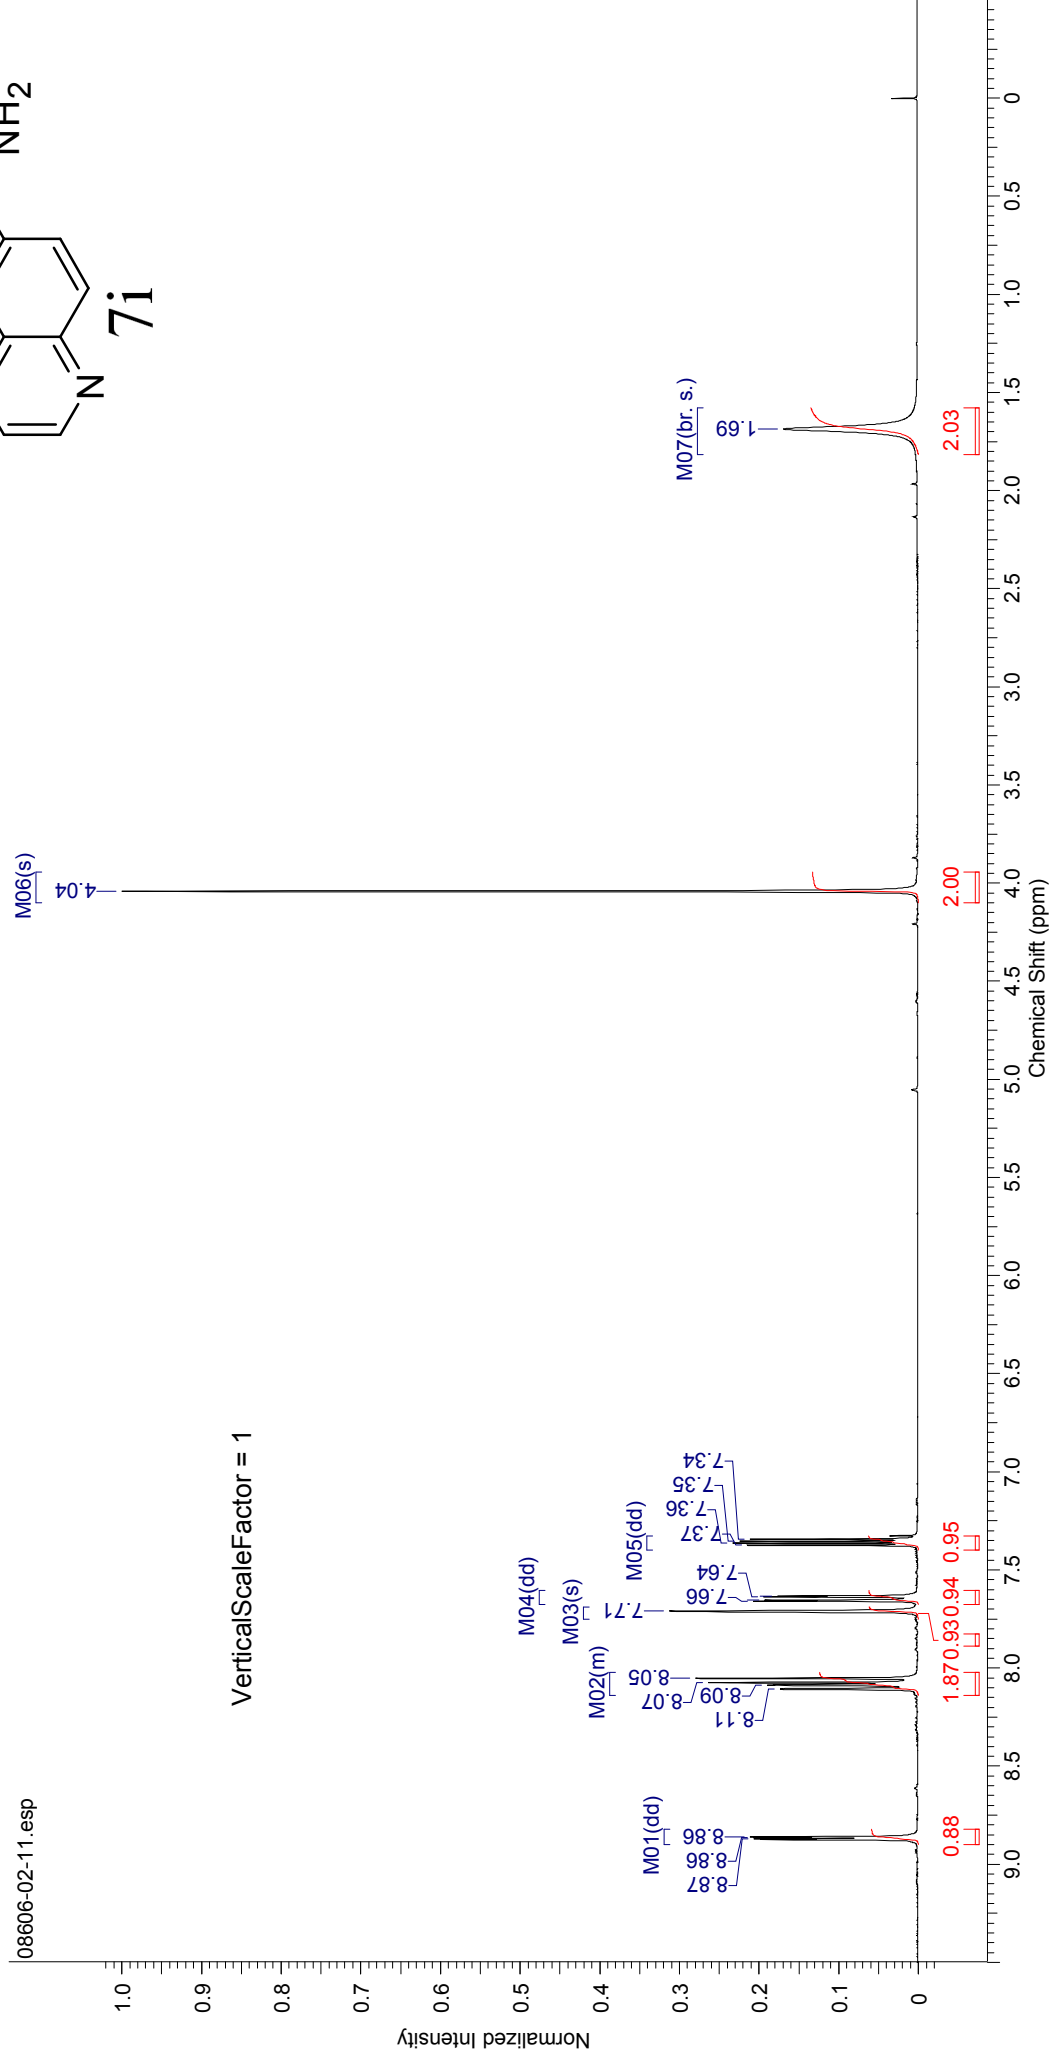

13C OBSERVE

Pulse Sequence: s2pul

Solvent: CDCl3

Ambient temperature

Mercury-400BB "6Fback"

Relax. delay 1.801 sec

Pulse 37.5 degrees

Acq. time 1.199 sec

Width 25000.0 Hz

192 repetitions

OBSERVE C13, 100.5606225 MHz

DECOUPLE H1, 399.9245689 MHz

Power 34 dB

continuously on

WALTZ-16 modulated

DATA PROCESSING

Line broadening 1.0 Hz

FT size 65536

Total time 52 min, 44 sec

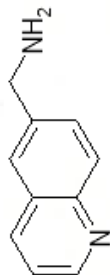

7i

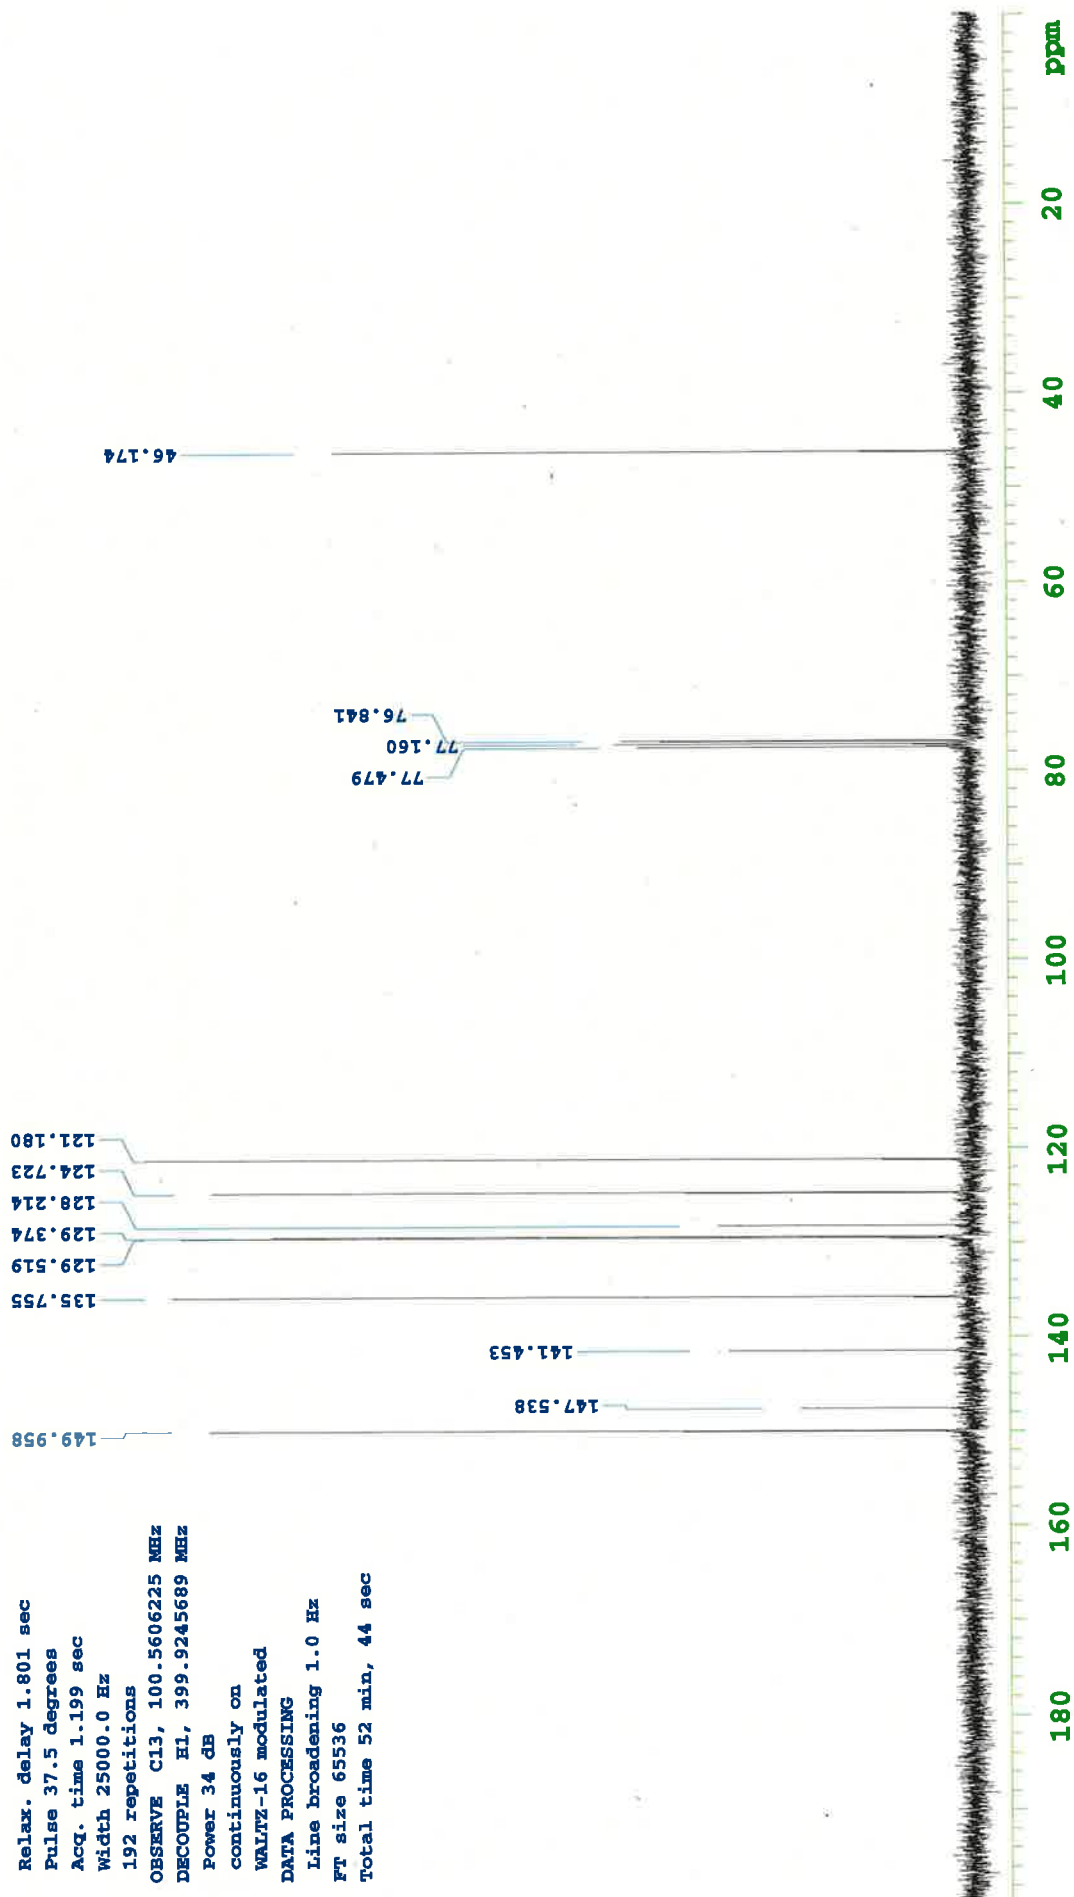

|                        |                 |               |                     |                  |         |                        |                      |              |
|------------------------|-----------------|---------------|---------------------|------------------|---------|------------------------|----------------------|--------------|
| Acquisition Time (sec) | 2.7320          | Comment       | STANDARD 1H OBSERVE |                  | Date    | Mar 20 2012            | Date Stamp           | Mar 20 2012  |
| File Name              | C:\USRX\NMR\FID |               | Frequency (MHz)     | 399.92           | Nucleus | 1H                     | Number of Transients | 32           |
| Original Points Count  | 16379           | Points Count  | 16384               | Pulse Sequence   | s2pul   | Receiver Gain          | 20.00                | Solvent      |
| Spectrum Offset (Hz)   | 2251.4490       | Spectrum Type | STANDARD            | Sweep Width (Hz) | 5995.20 | Temperature (degree C) | AMBIENT              | TEMPERATURE  |
|                        |                 |               |                     |                  |         |                        |                      | CHLOROFORM-d |

<sup>1</sup>H NMR (400 MHz, CHLOROFORM-d)  $\delta$  8.08 (d,  $J=2.20$  Hz, 1H), 7.57 (dd,  $J=8.78$  Hz, 1H), 6.73 (d,  $J=8.78$  Hz, 1H), 3.93 (s, 3H), 3.81 (s, 2H), 1.50 (br. s., 2H)

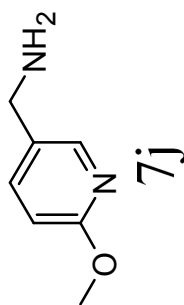

VerticalScaleFactor = 1

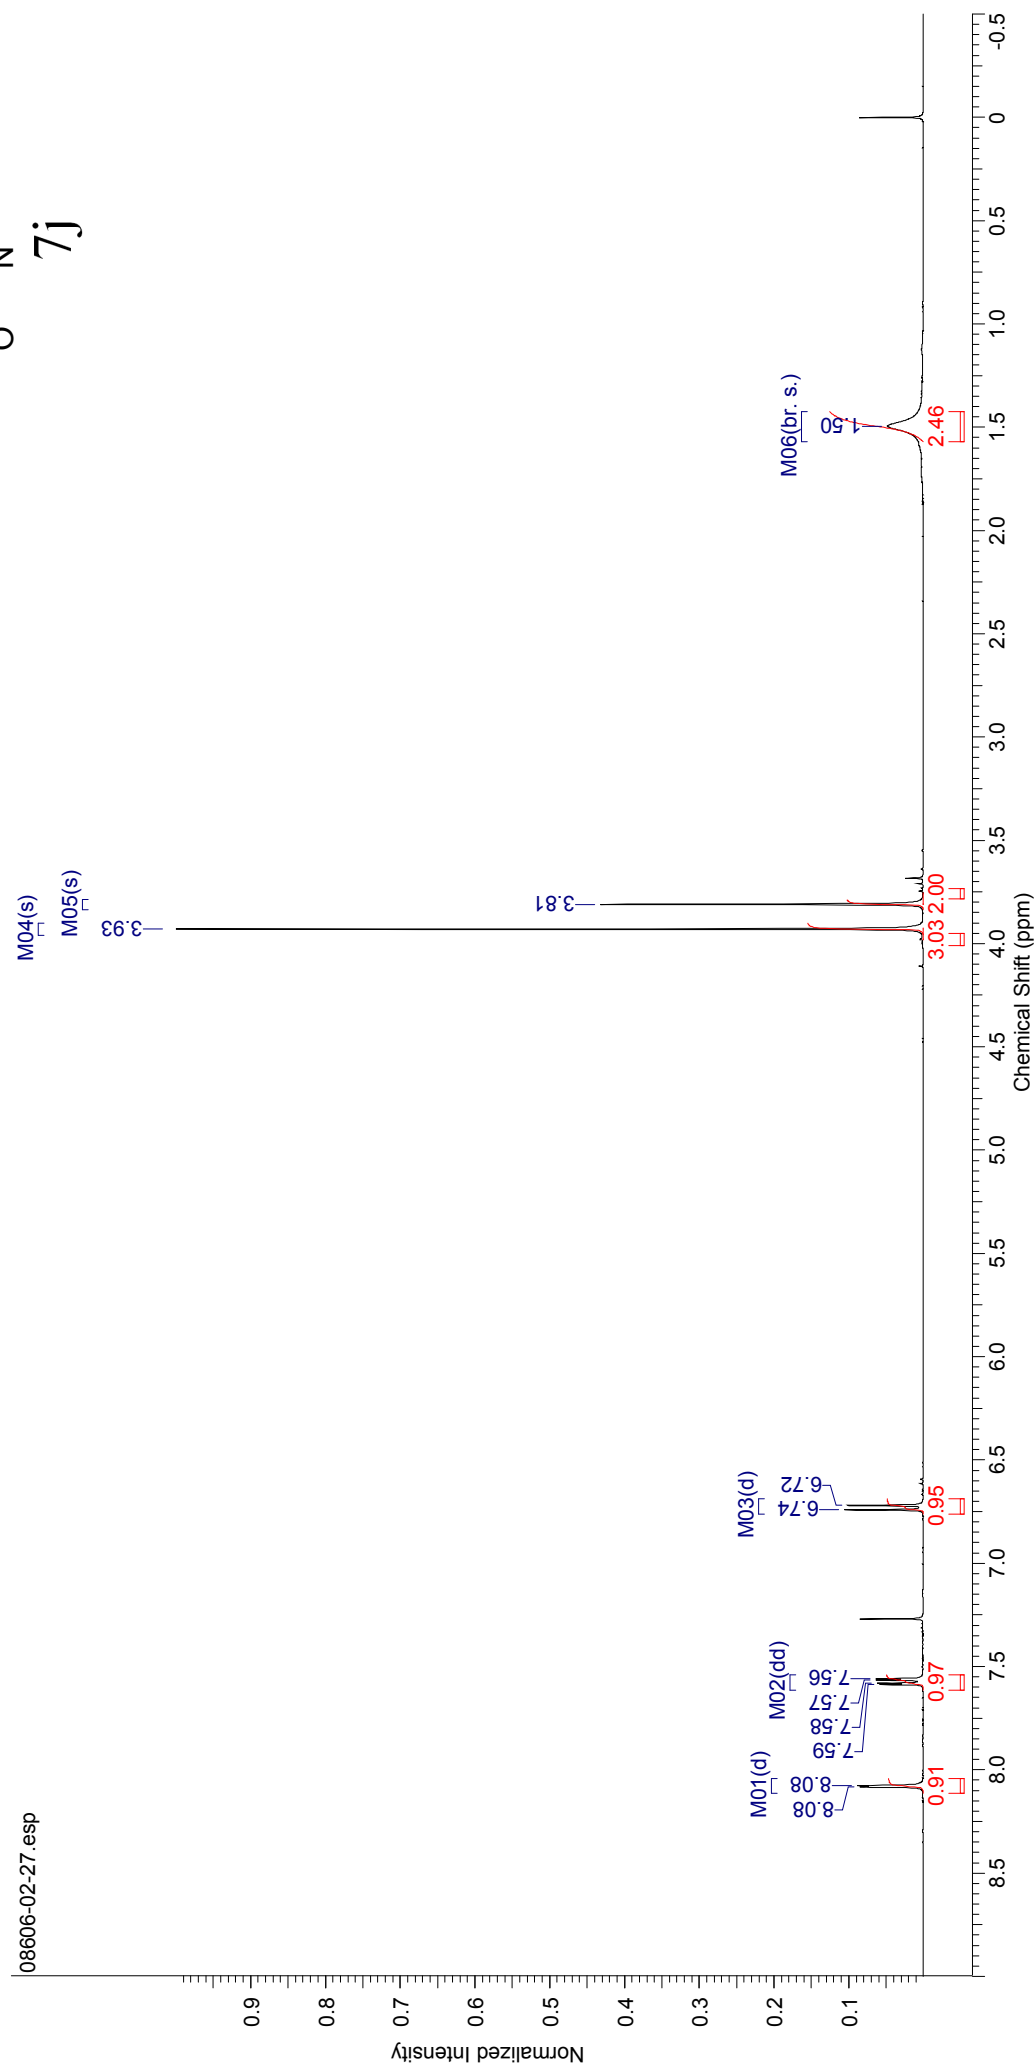

13C OBSERVE

Pulse Sequence: s2pul

Solvent: CDCl3

Ambient temperature

Mercury-400BB "6Fback"

Relax. delay 1.801 sec

Pulse 37.5 degrees

Acq. time 1.199 sec

Width 25000.0 Hz

544 repetitions

OBSERVE C13, 100.5606072 MHz

DECOUPLE H1, 399.9245689 MHz

Power 34 dB

continuously on

WALTZ-16 modulated

DATA PROCESSING

Line broadening 1.0 Hz

FT size 65536

Total time 7 hr, 26 min, 4 sec

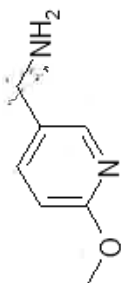

7j

76.841  
77.160  
77.479

43.511

53.541

110.938

131.279

138.357

145.520

ppm

20

40

60

80

100

120

140

160

180

|         |                                                 |    |          |
|---------|-------------------------------------------------|----|----------|
| Formula | C <sub>9</sub> H <sub>10</sub> N <sub>2</sub> S | FW | 178.2541 |
|---------|-------------------------------------------------|----|----------|

|                        |                |               |                     |                  |         |                                            |                      |             |              |             |
|------------------------|----------------|---------------|---------------------|------------------|---------|--------------------------------------------|----------------------|-------------|--------------|-------------|
| Acquisition Time (sec) | 2.7320         | Comment       | STANDARD 1H OBSERVE |                  |         |                                            | Date                 | Feb 25 2012 | Date Stamp   | Feb 25 2012 |
| File Name              | C:\USR\NMR\FID |               | Frequency (MHz)     | 399.92           | Nucleus | 1H                                         | Number of Transients |             | 32           |             |
| Original Points Count  | 16379          | Points Count  | 16384               | Pulse Sequence   | s2pul   | Receiver Gain                              | 12.00                | Solvent     | CHLOROFORM-d |             |
| Spectrum Offset (Hz)   | 2254.3765      | Spectrum Type | STANDARD            | Sweep Width (Hz) | 5995.20 | Temperature (degree C) AMBIENT TEMPERATURE |                      |             |              |             |

<sup>1</sup>H NMR (400 MHz, CHLOROFORM-d)  $\delta$  7.87 (d,  $J=0.73$  Hz, 1H), 7.77 (d,  $J=8.05$  Hz, 1H), 7.32 (dd,  $J=1.46, 8.05$  Hz, 1H), 4.00 (s, 2H), 2.83 (s, 3H), 1.63 (br. s., 2H)

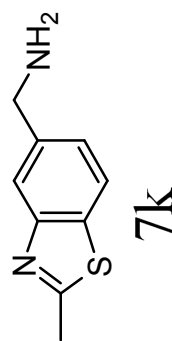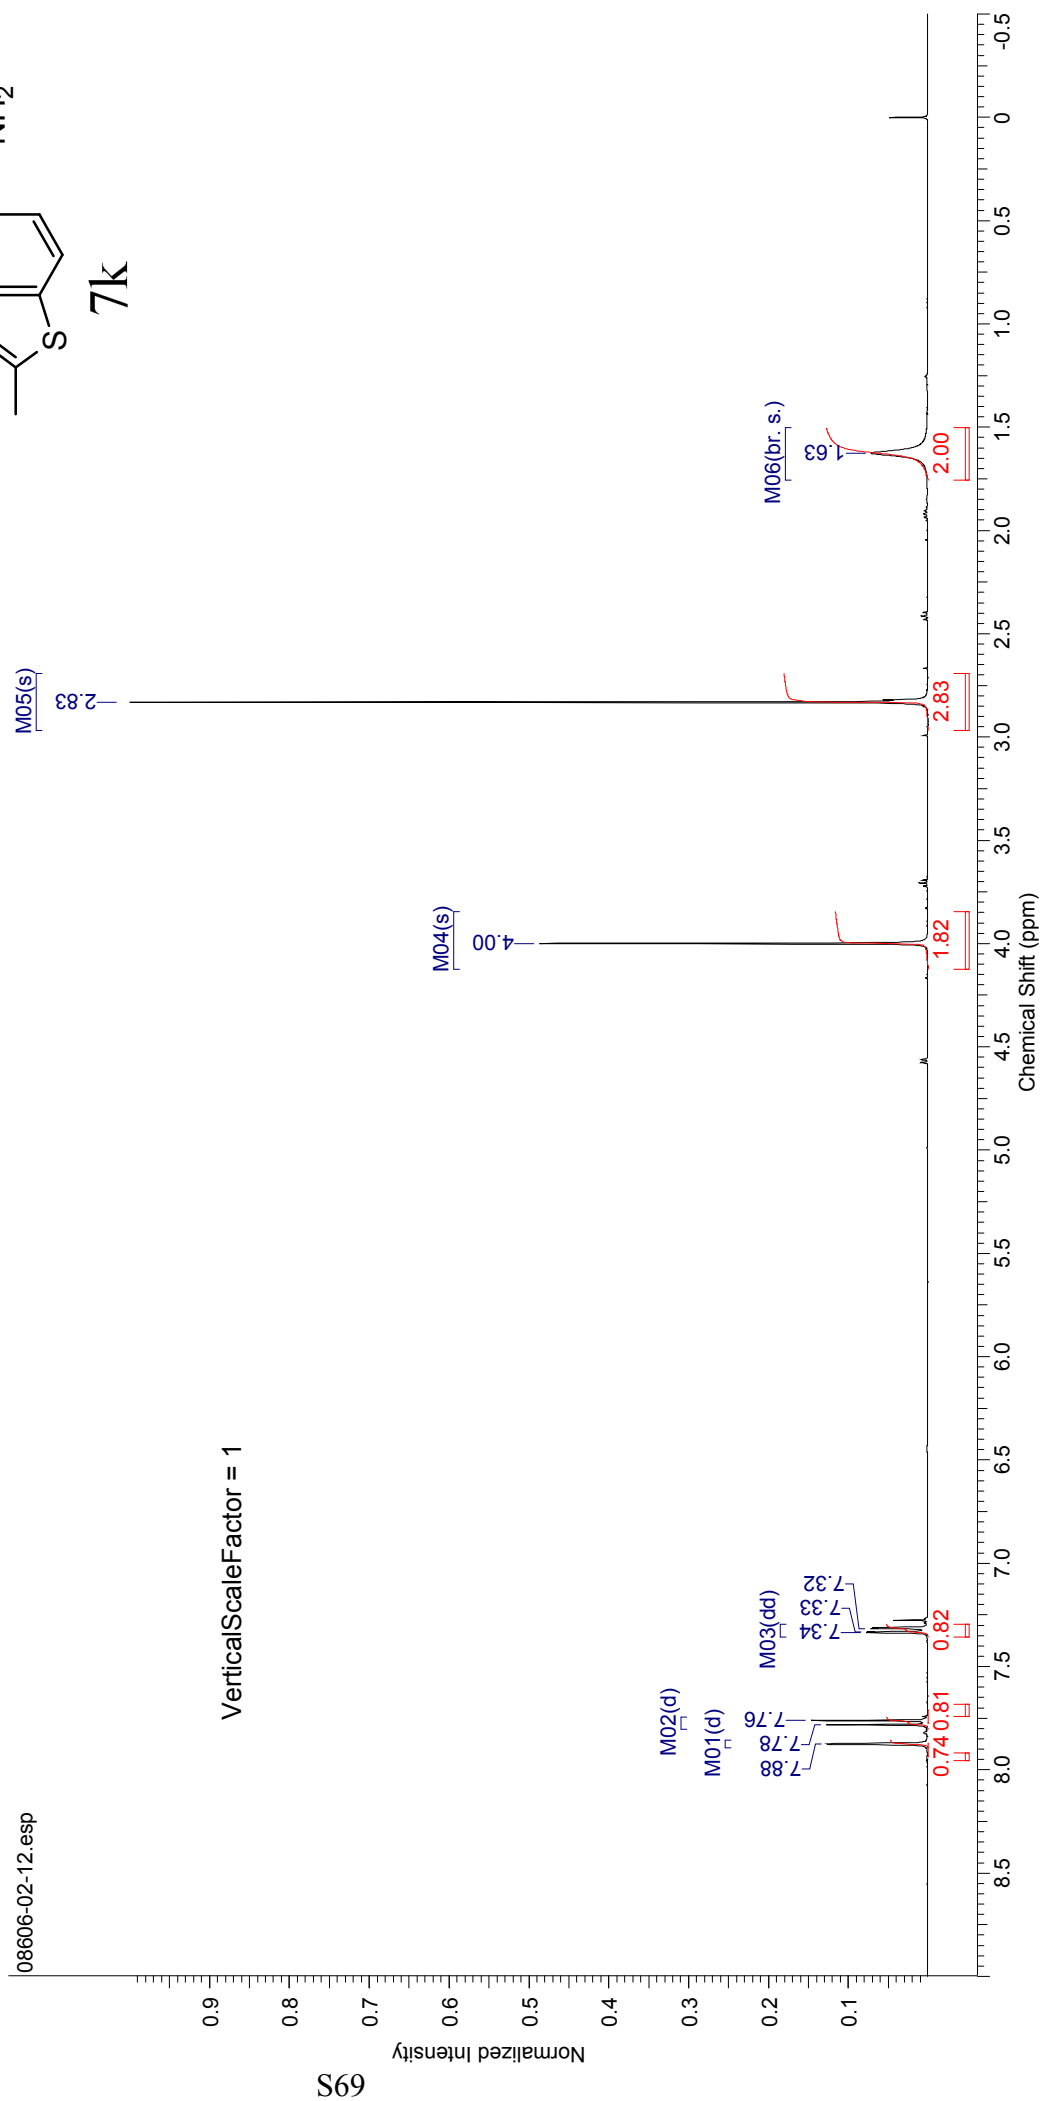

13C OBSERVE

Pulse Sequence: s2pul

Solvent: CDCl3

Ambient temperature

Mercury-400BB "6Fback"

Relax. delay 1.801 sec

Pulse 37.5 degrees

Acq. time 1.199 sec

Width 25000.0 Hz

384 repetitions

OBSERVE C13, 100.5606110 MHz

DECOUPLE H1, 399.9245689 MHz

Power 34 dB

continuously on

WALTZ-16 modulated

DATA PROCESSING

Line broadening 1.0 Hz

FT size 65536

Total time 1 hr, 47 min, 35 sec

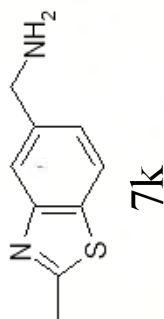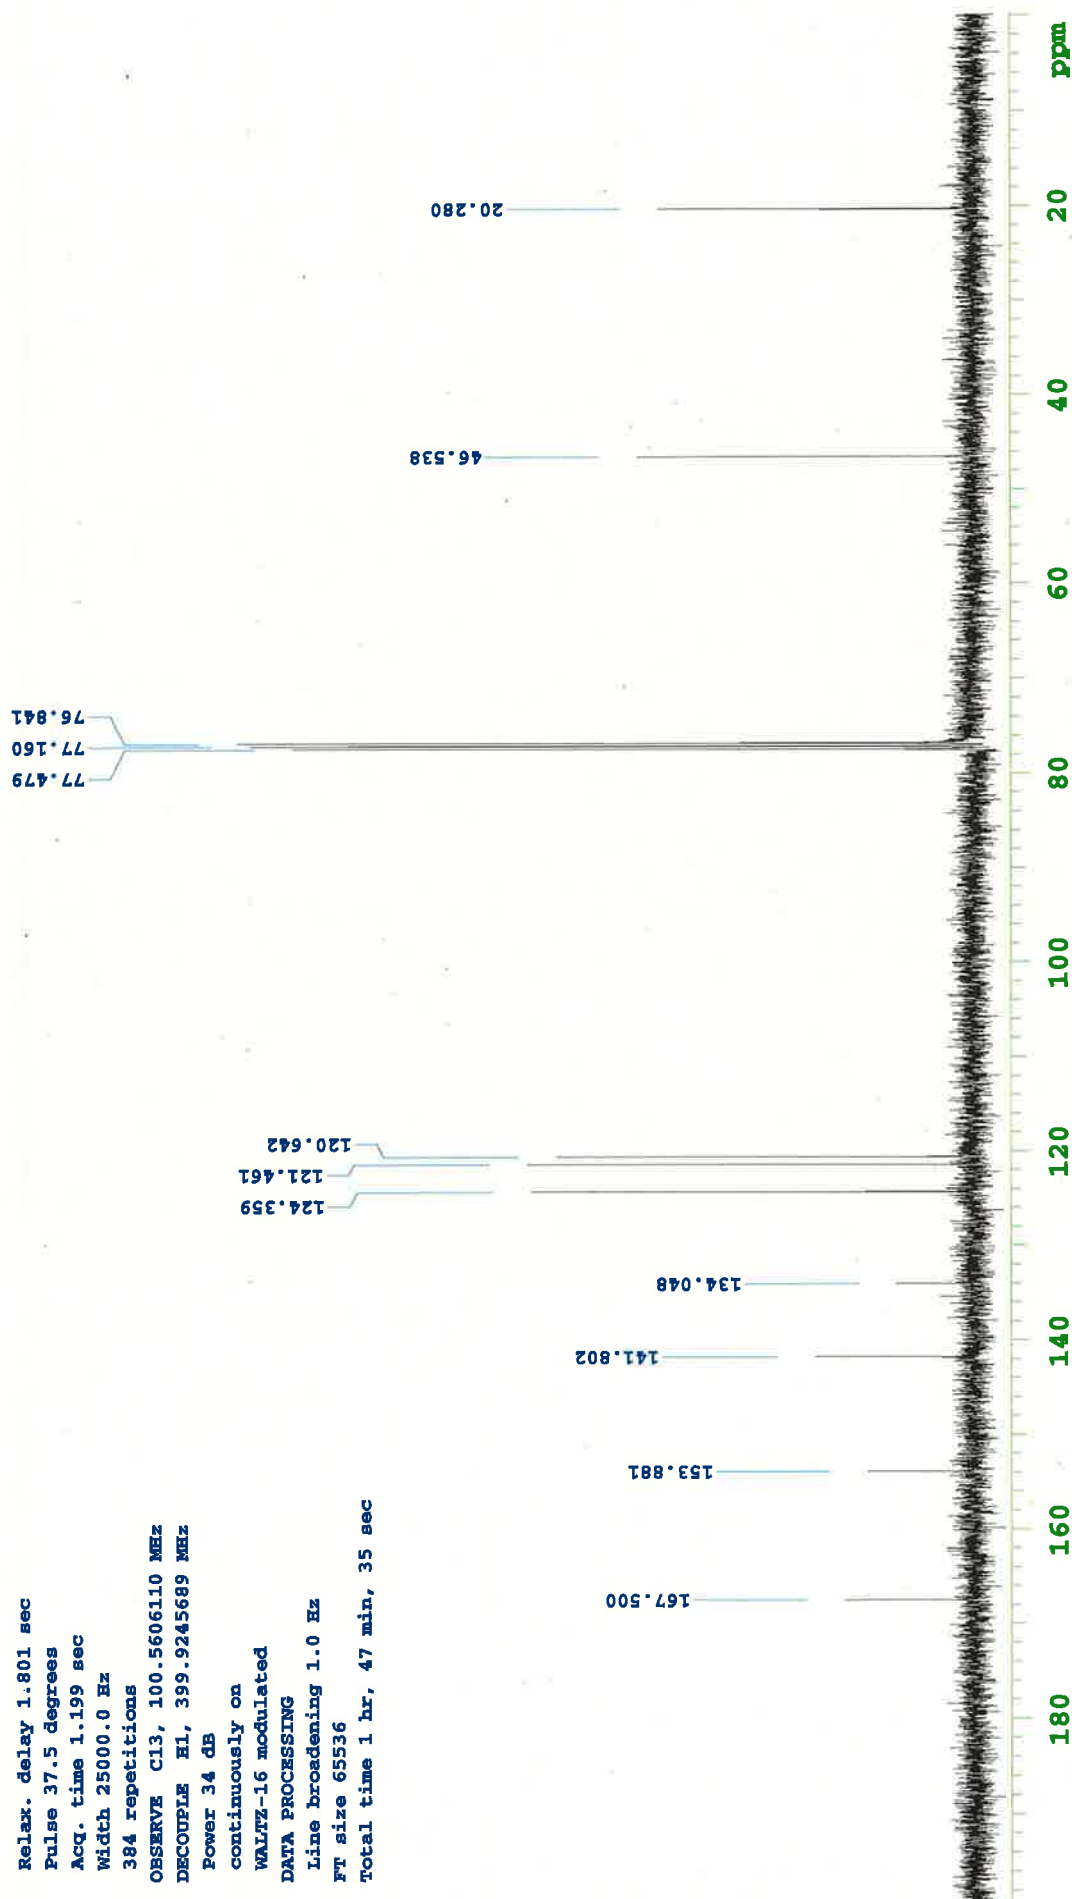

|                        |               |               |                     |         |                        |                     |                      |              |             |
|------------------------|---------------|---------------|---------------------|---------|------------------------|---------------------|----------------------|--------------|-------------|
| Acquisition Time (sec) | 2.7320        | Comment       | STANDARD 1H OBSERVE |         |                        | Date                | Mar 20 2012          | Date Stamp   | Mar 20 2012 |
| File Name              | C:\USR\NMRFID |               | Frequency (MHz)     | 399.92  | Nucleus                | 1H                  | Number of Transients | 32           |             |
| Original Points Count  | 16379         | Points Count  | Pulse Sequence      | s2pul   | Receiver Gain          | 14.00               | Solvent              | CHLOROFORM-d |             |
| Spectrum Offset (Hz)   | 2246.6919     | Spectrum Type | Sweep Width (Hz)    | 5995.20 | Temperature (degree C) | AMBIENT TEMPERATURE |                      |              |             |

<sup>1</sup>H NMR (400 MHz, CHLOROFORM-d) δ 7.18 (dd, *J*=0.73, 5.12 Hz, 1H), 7.10-7.15 (m, 1H), 6.95-7.03 (m, 2H), 6.80 (d, *J*=3.29 Hz, 1H), 4.02 (s, 2H), 1.63 (br. s., 2H)

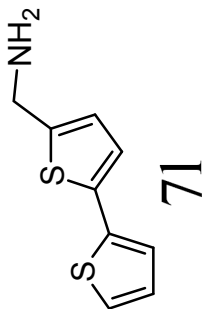

VerticalScaleFactor = 1

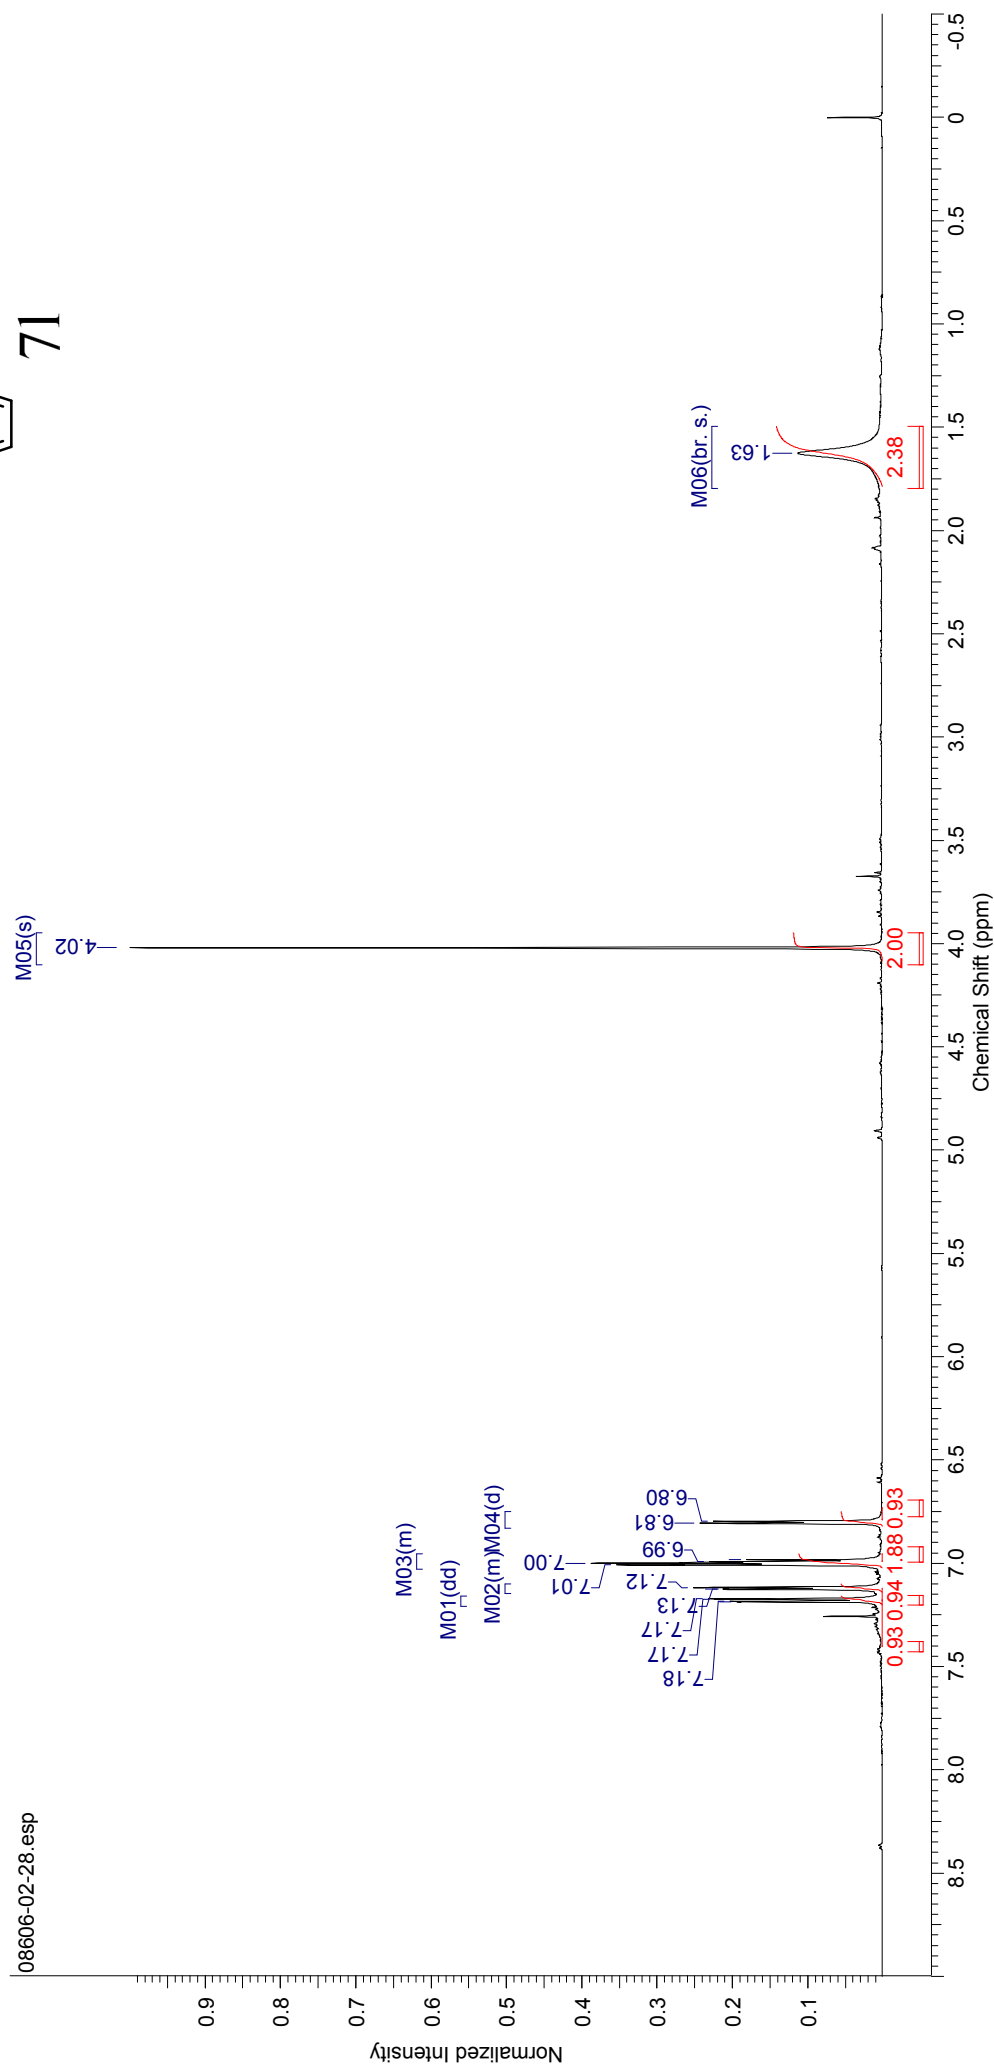

13C OBSERVE

Pulse Sequence: s2pul

Solvent: CDCl<sub>3</sub>

Ambient temperature

Mercury-400BB "6Fback"

Relax. delay 1.801 sec

Pulse 37.5 degrees

Acq. time 1.199 sec

Width 25000.0 Hz

464 repetitions

OBSERVE C13, 100.5606118 MHz

DECOUPLE H1, 399.9245689 MHz

Power 34 dB

continuously on

WALTZ-16 modulated

DATA PROCESSING

Line broadening 1.0 Hz

FT size 65536

Total time 7 hr, 26 min, 4 sec

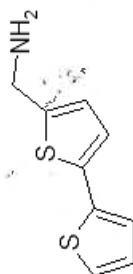

71

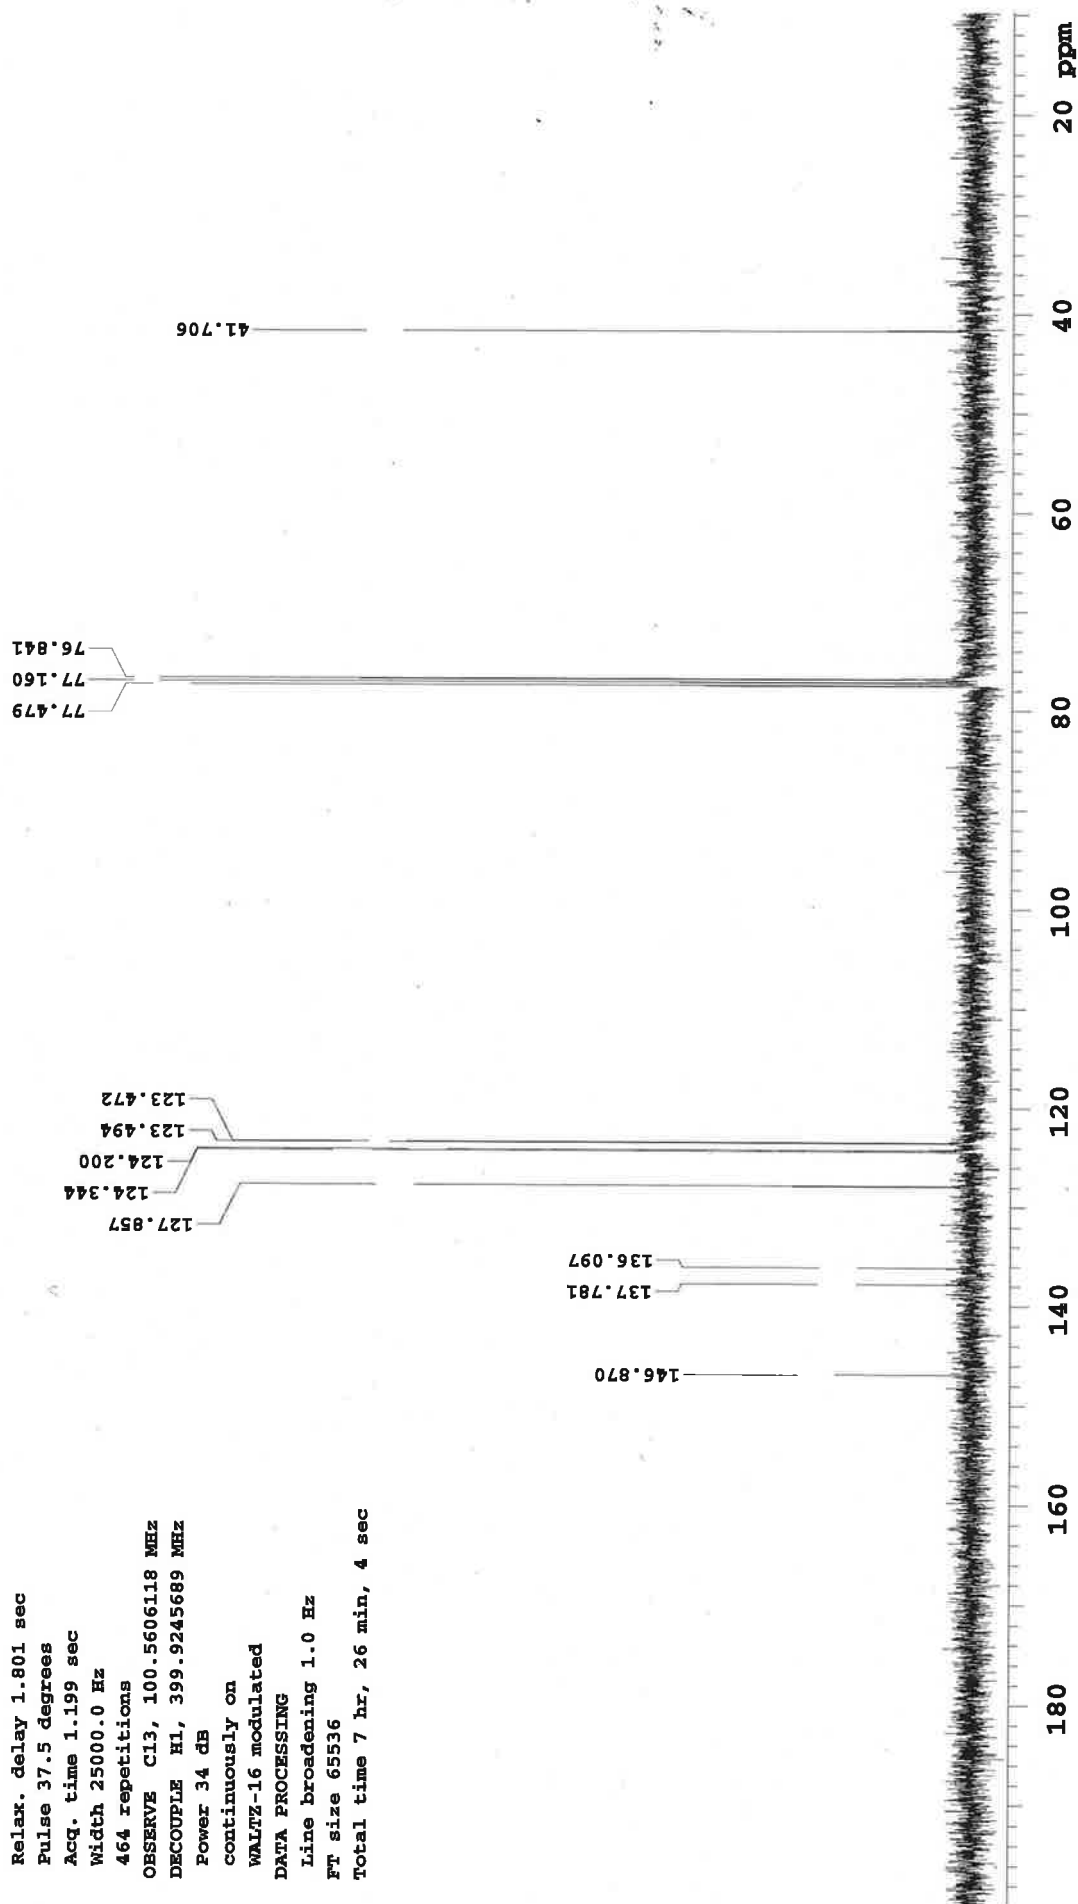

|         |                                                  |    |          |
|---------|--------------------------------------------------|----|----------|
| Formula | C <sub>11</sub> H <sub>10</sub> O <sub>3</sub> S | FW | 222.2603 |
|---------|--------------------------------------------------|----|----------|

| Acquisition Time (sec) |                | 2.7320 | Comment       | STANDARD 1H OBSERVE |         | Date                   | Oct 23 2011 | Date Stamp           | Oct 23 2011  |
|------------------------|----------------|--------|---------------|---------------------|---------|------------------------|-------------|----------------------|--------------|
| File Name              | C:\USR\NMR\FID |        |               | Frequency (MHz)     | 399.92  | Nucleus                | 1H          | Number of Transients | 32           |
| Original Points Count  | 16379          |        | Points Count  | Pulse Sequence      | s2pul   | Receiver Gain          | 14.00       | Solvent              | CHLOROFORM-d |
| Spectrum Offset (Hz)   | 2246.3259      |        | Spectrum Type | STANDARD            |         | Temperature (degree C) | AMBIENT     | TEMPERATURE          |              |
|                        |                |        |               | Sweep Width (Hz)    | 5995.20 |                        |             |                      |              |

<sup>1</sup>H NMR (400 MHz, CHLOROFORM-d)  $\delta$  7.82-7.92 (m, 3H), 7.76 (d,  $J=2.20$  Hz, 1H), 7.49-7.58 (m, 2H), 7.41 (ddd,  $J=1.10, 2.38, 8.97$  Hz, 1H), 3.18 (d,  $J=1.10$  Hz, 3H)

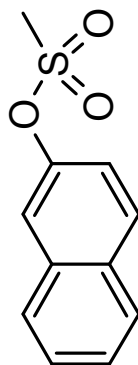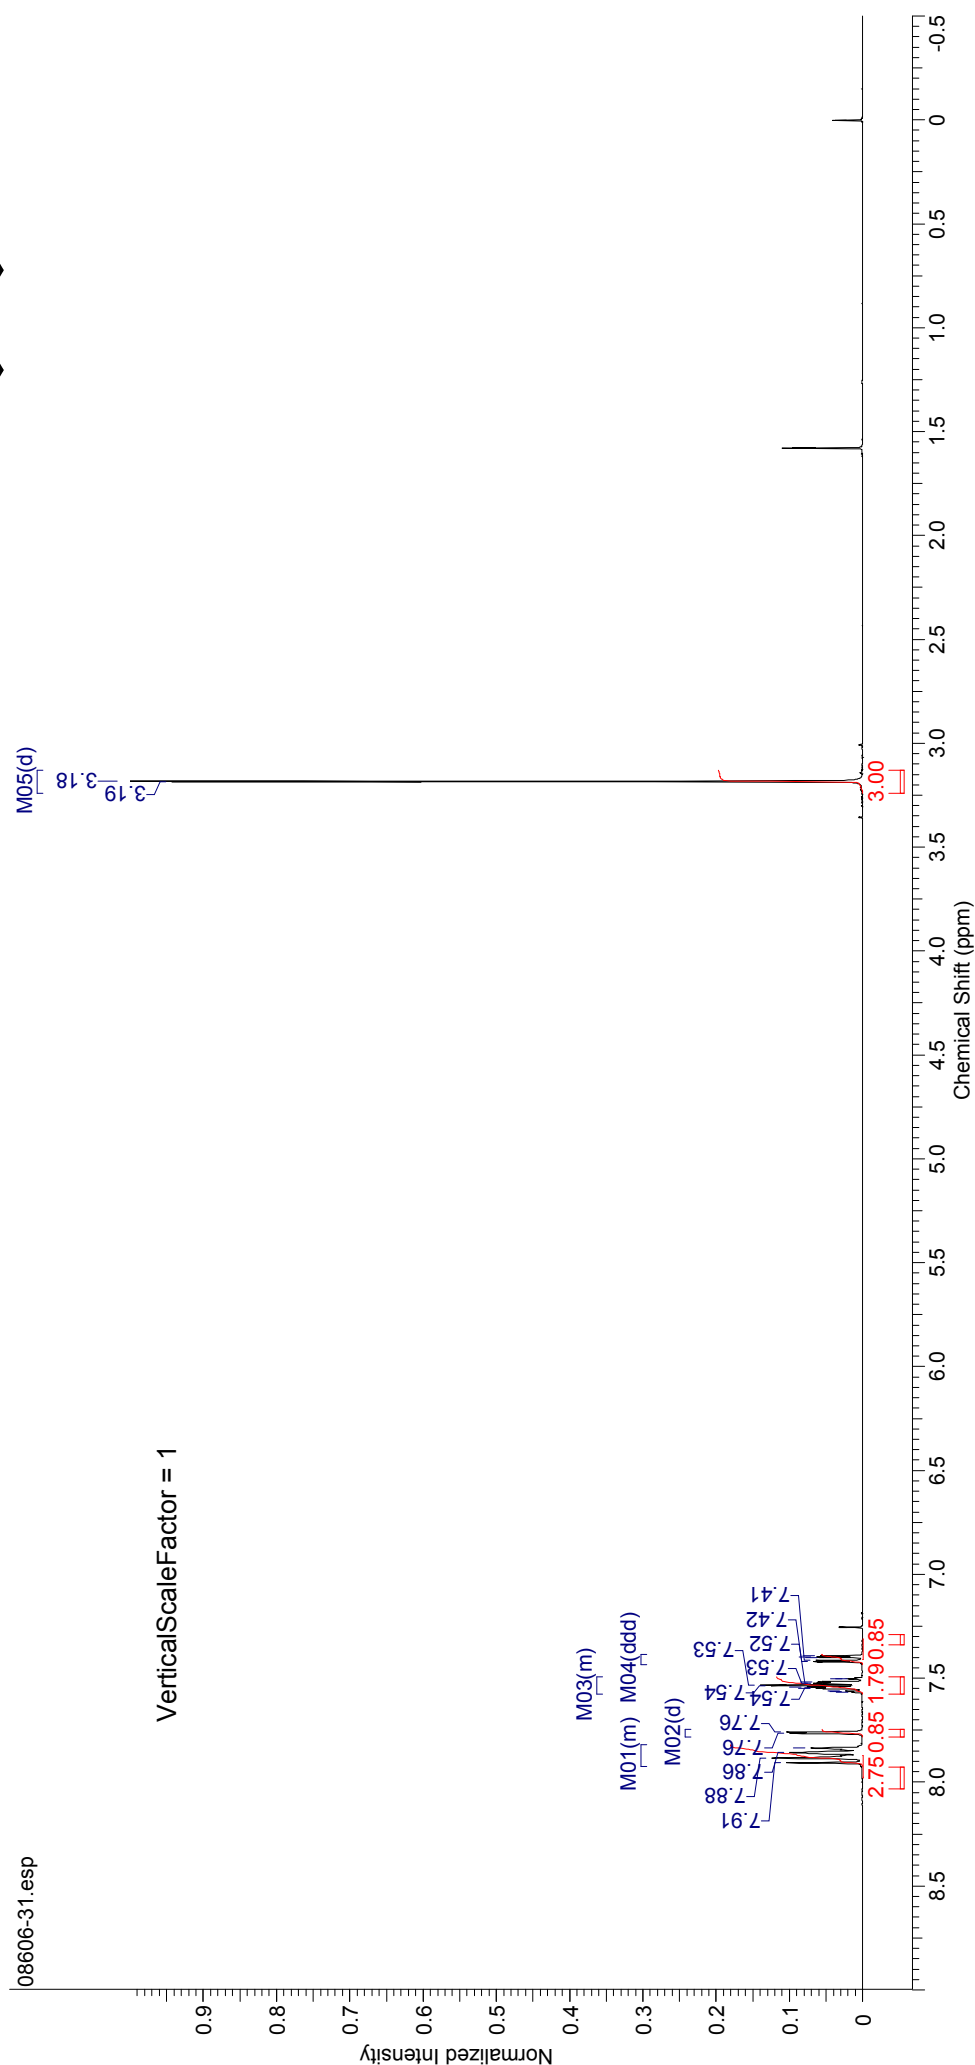

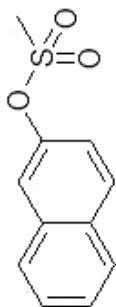

13C OBSERVE

Pulse Sequence: s2pul

Solvent: CDCl3

Ambient temperature

File: 08606-31

Mercury-400BB "6Fback"

Relax. delay 1.801 sec

Pulse 37.5 degrees

Acq. time 1.199 sec

Width 25000.0 Hz

448 repetitions

OBSERVE C13, 100.5606103 MHz

DECOUPLE H1, 399.9245689 MHz

Power 34 dB

continuously on

WALTZ-16 modulated

DATA PROCESSING

Line broadening 1.0 Hz

FT size 65536

Total time 3 hr, 34 min, 58 sec

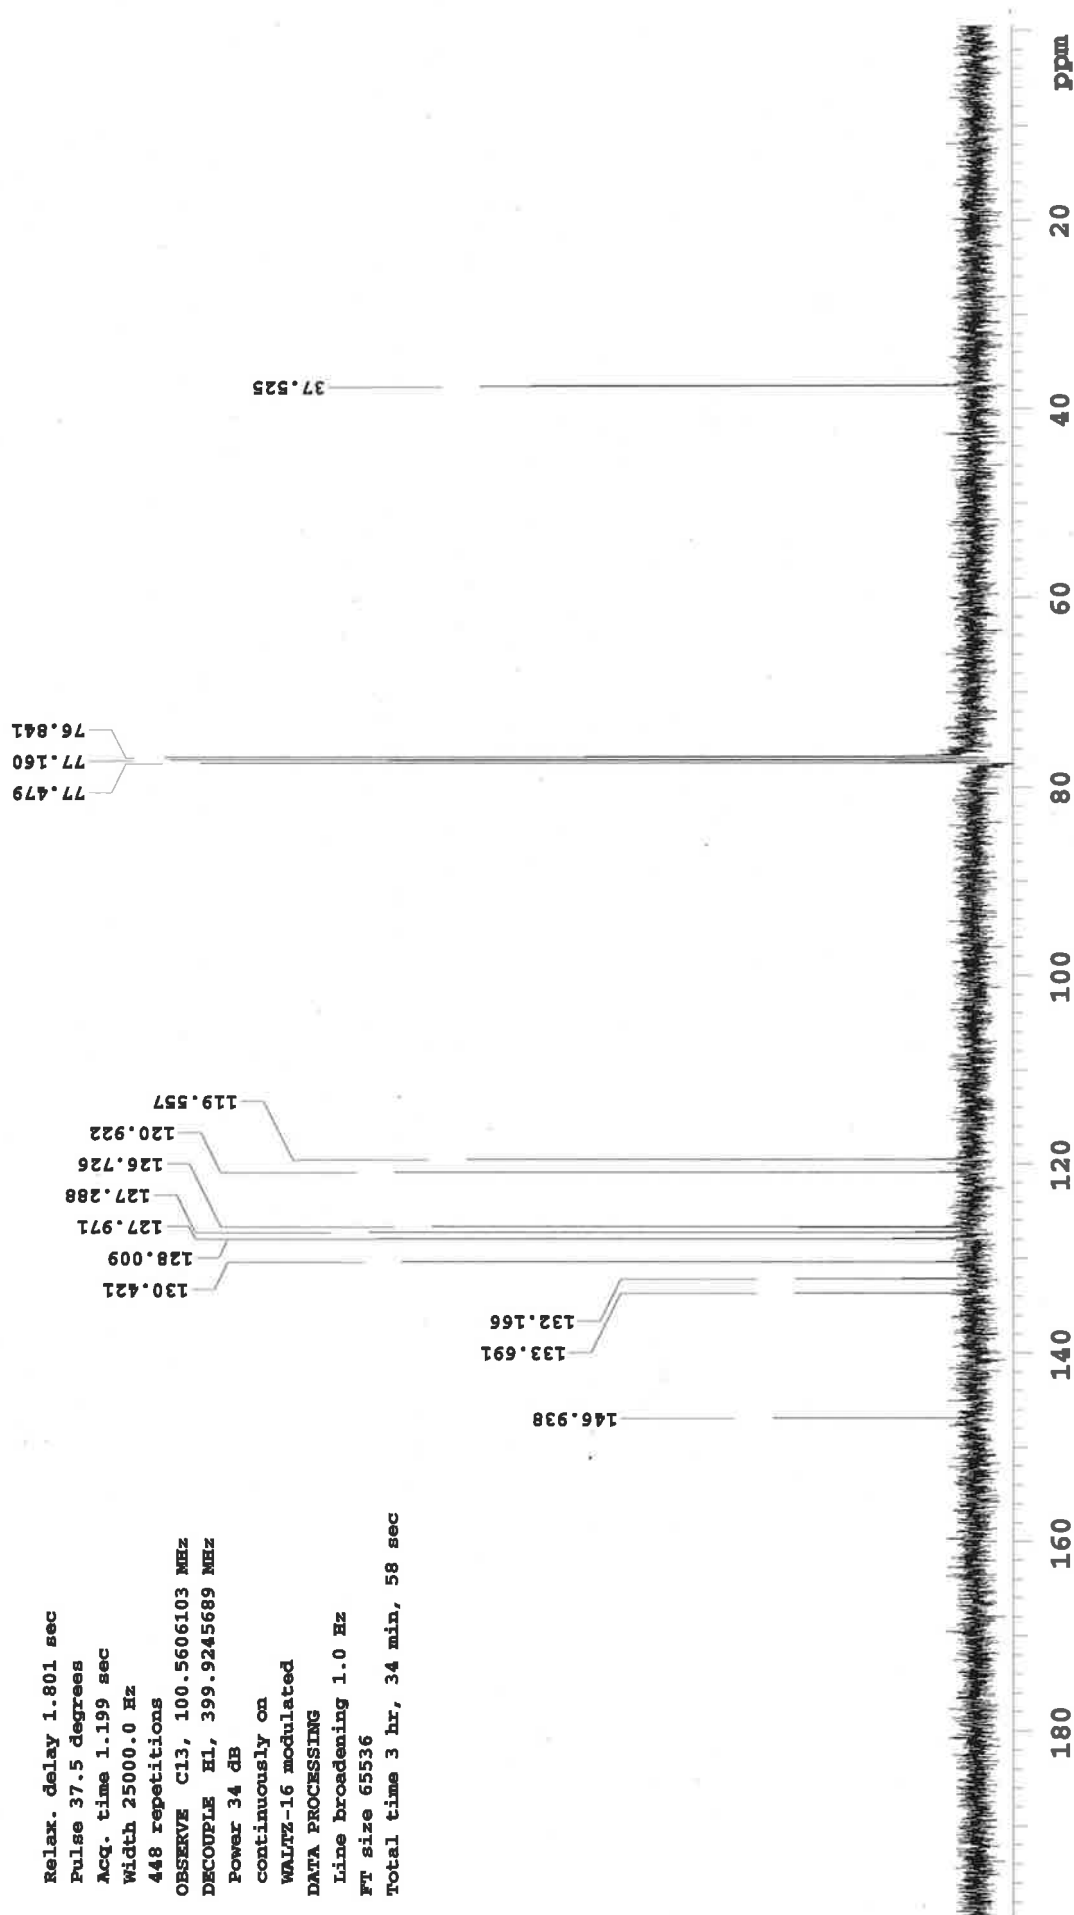

|         |                                                  |    |          |
|---------|--------------------------------------------------|----|----------|
| Formula | C <sub>17</sub> H <sub>14</sub> O <sub>3</sub> S | FW | 298.3563 |
|---------|--------------------------------------------------|----|----------|

| Acquisition Time (sec) |                | Comment       | STANDARD 1H OBSERVE |                  |         |  | Date                   | Oct 23 2011         |  | Date Stamp           | Oct 23 2011  |  |
|------------------------|----------------|---------------|---------------------|------------------|---------|--|------------------------|---------------------|--|----------------------|--------------|--|
| File Name              | C:\USR\NMR\FID |               |                     | Frequency (MHz)  | 399.92  |  | Nucleus                | 1H                  |  | Number of Transients | 32           |  |
| Original Points Count  | 16379          | Points Count  | 16384               | Pulse Sequence   | s2pul   |  | Receiver Gain          | 14.00               |  | Solvent              | CHLOROFORM-d |  |
| Spectrum Offset (Hz)   | 2246.6919      | Spectrum Type | STANDARD            | Sweep Width (Hz) | 5995.20 |  | Temperature (degree C) | AMBIENT TEMPERATURE |  |                      |              |  |

<sup>1</sup>H NMR (400 MHz, CHLOROFORM-d)  $\delta$  7.77-7.84 (m, 1H), 7.70-7.77 (m, 4H), 7.44-7.51 (m, 3H), 7.29 (d,  $J$ =8.05 Hz, 2H), 7.09 (dd,  $J$ =2.38, 8.97 Hz, 1H), 2.44 (s, 3H)

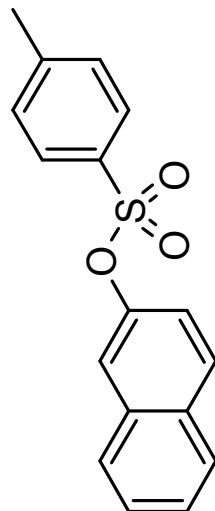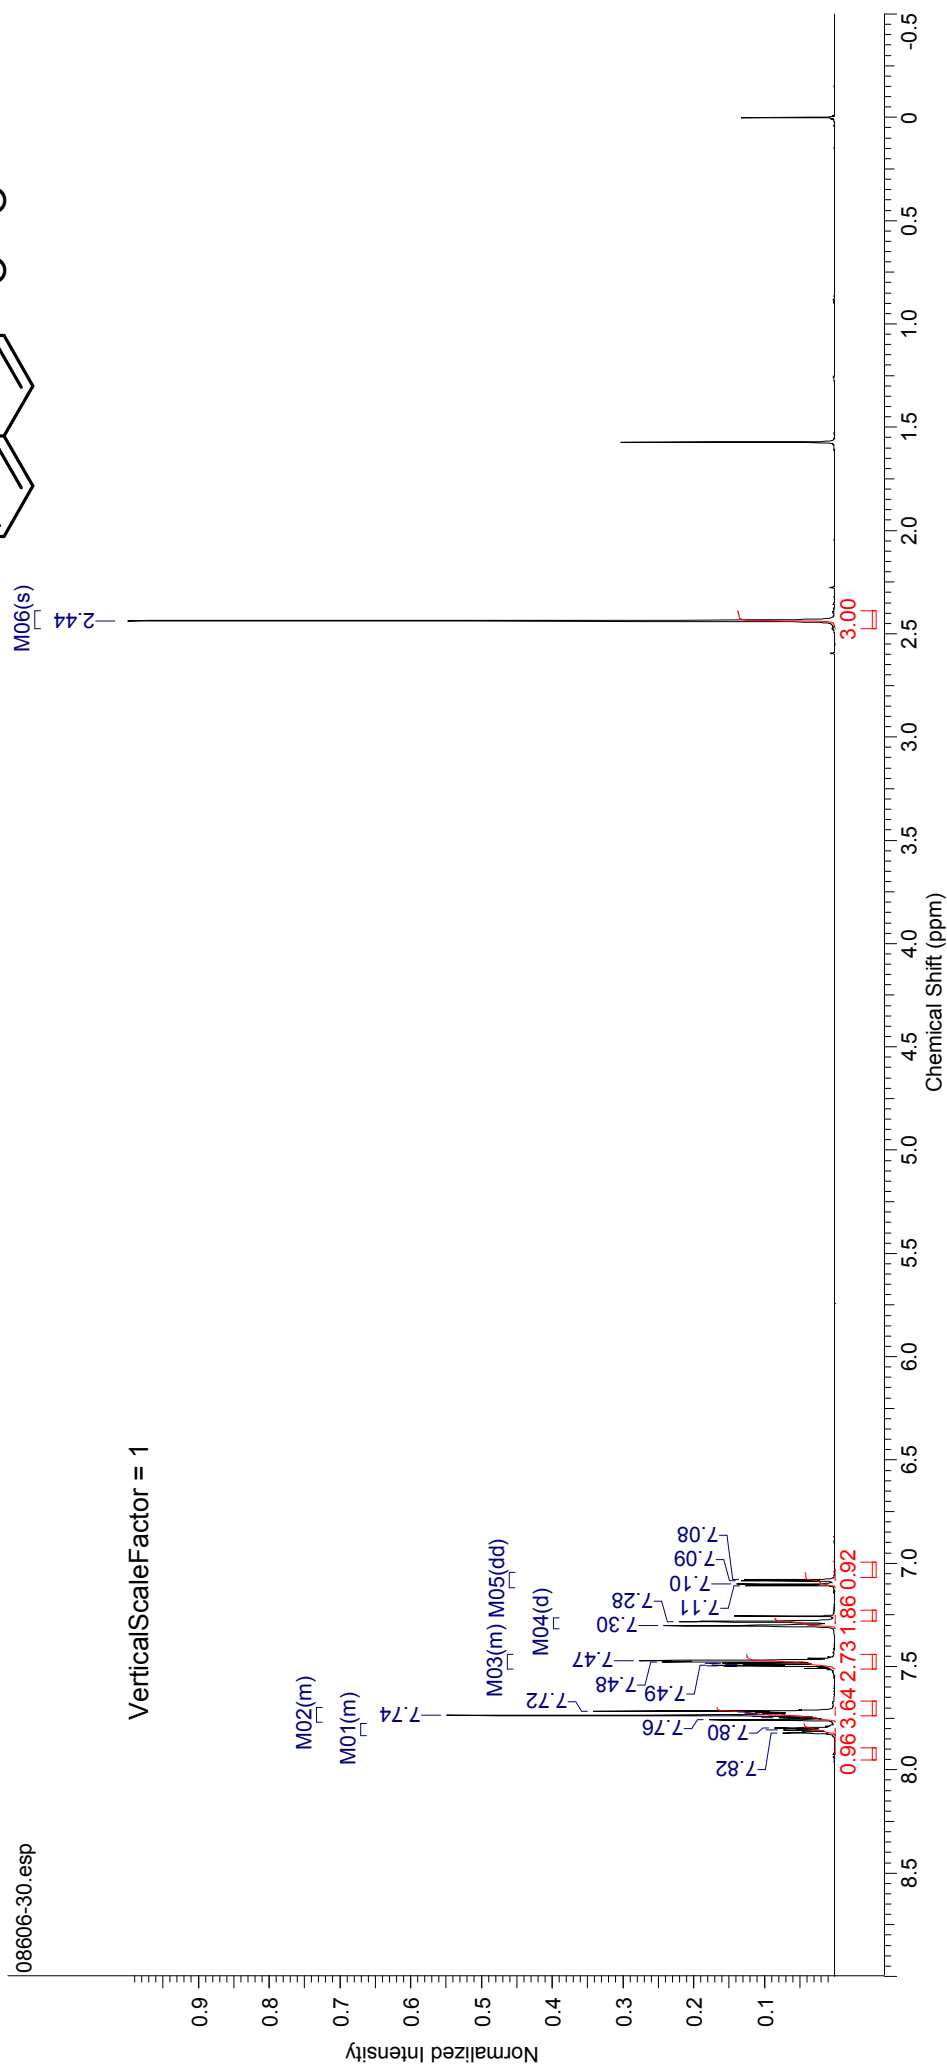

13C OBSERVE

Pulse Sequence: s2pul

Solvent: CDCl3

Ambient temperature

File: 08606-30

Mercury-400BB "6Fback"

Relax. delay 1.801 sec

Pulse 37.5 degrees

Acq. time 1.199 sec

Width 25000.0 Hz

512 repetitions

OBSERVE C13, 100.5606087 MHz

DECOUPLE H1, 399.9245689 MHz

Power 34 dB

continuously on

WALTZ-16 modulated

DATA PROCESSING

Line broadening 1.0 Hz

FT size 65536

Total time 3 hr, 34 min, 58 sec

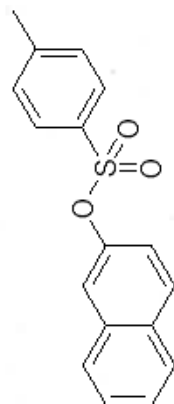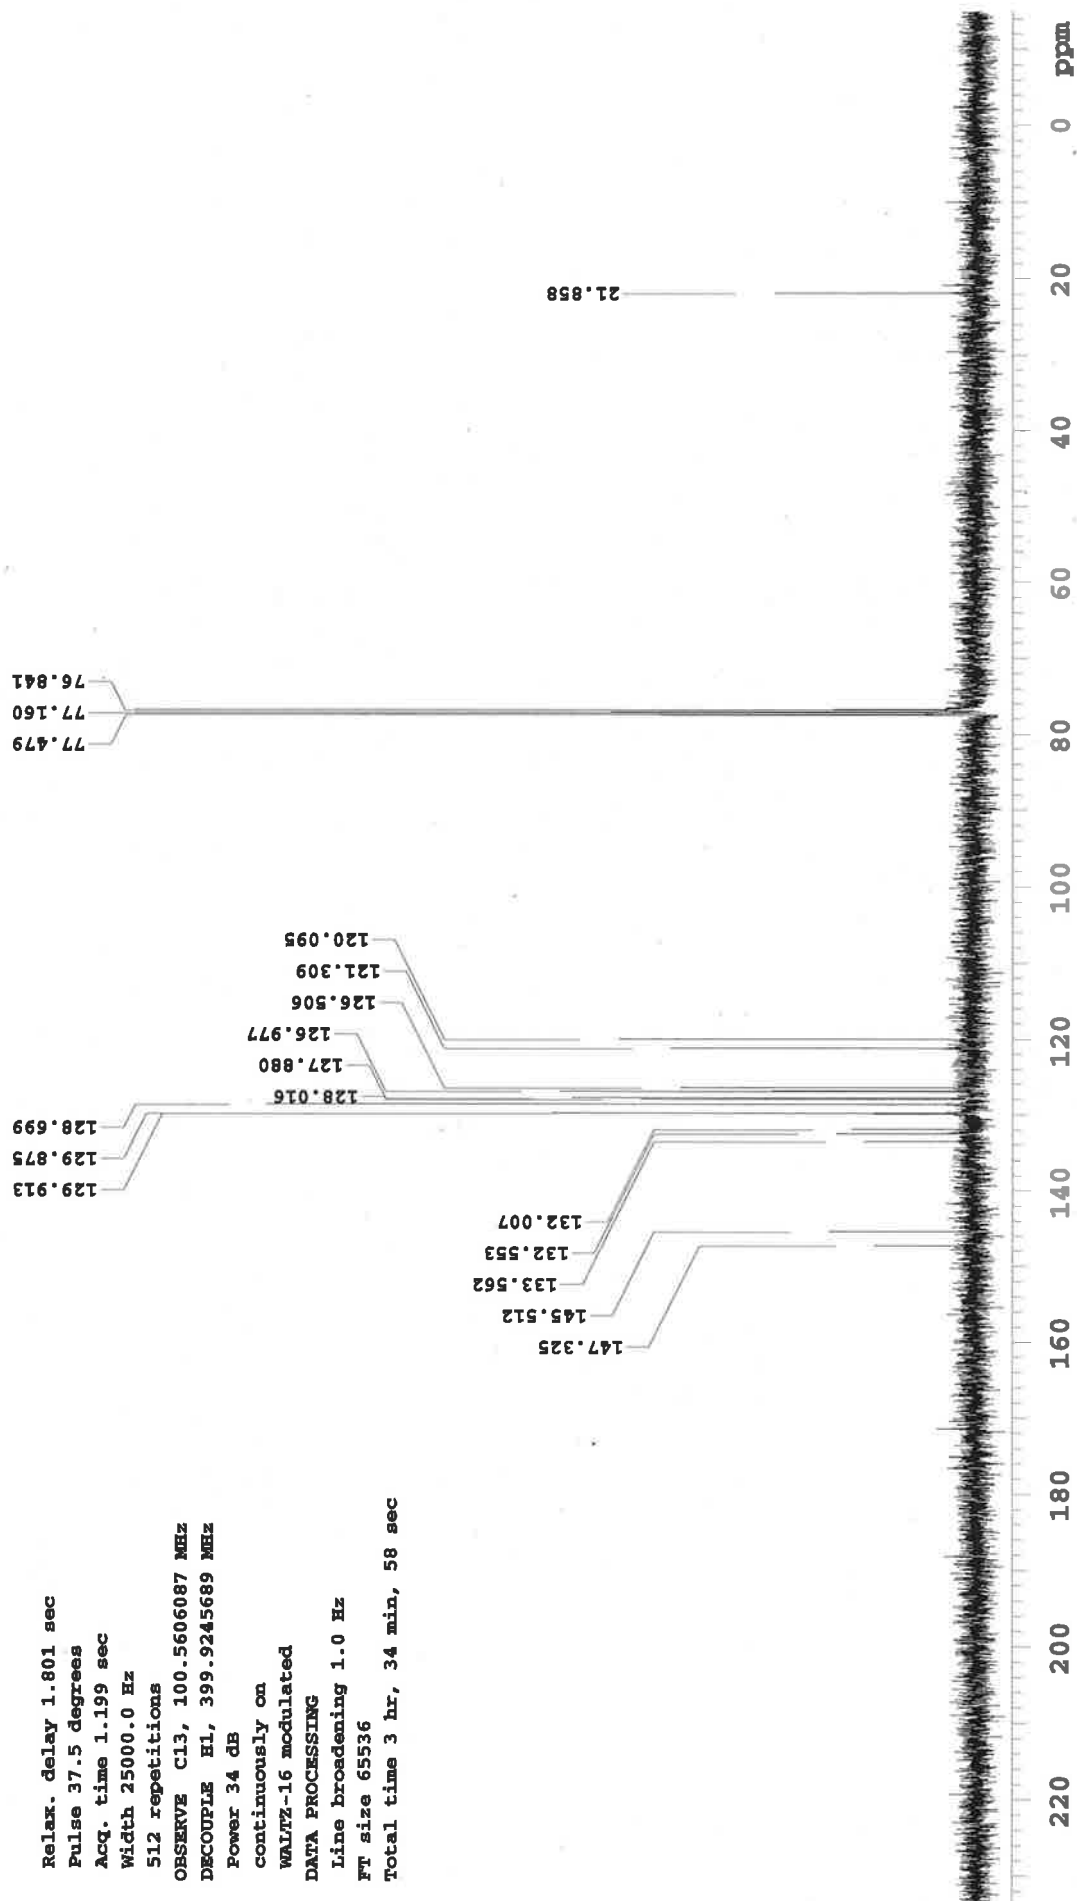

|                        |                 |               |                     |                  |               |                        |                      |              |
|------------------------|-----------------|---------------|---------------------|------------------|---------------|------------------------|----------------------|--------------|
| Acquisition Time (sec) | 2.7320          | Comment       | STANDARD 1H OBSERVE |                  | Date          | Feb 25 2012            | Date Stamp           | Feb 25 2012  |
| File Name              | C:\USRR\NMR\FID |               | Frequency (MHz)     | 399.92           | Nucleus       | 1H                     | Number of Transients | 32           |
| Original Points Count  | 16379           | Points Count  | Pulse Sequence      | s2pul            | Receiver Gain | 10.00                  | Solvent              | CHLOROFORM-d |
| Spectrum Offset (Hz)   | 2247.6414       | Spectrum Type | STANDARD            | Sweep Width (Hz) | 5995.20       | Temperature (degree C) | AMBIENT              | TEMPERATURE  |

<sup>1</sup>H NMR (400 MHz, CHLOROFORM-d)  $\delta$  6.44 (d,  $J=2.20$  Hz, 2H), 6.38-6.42 (m, 1H), 3.78 (s, 6H), 3.13 (s, 3H)

VerticalScaleFactor = 1

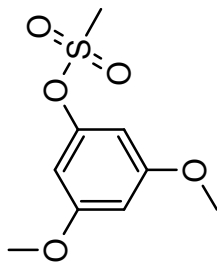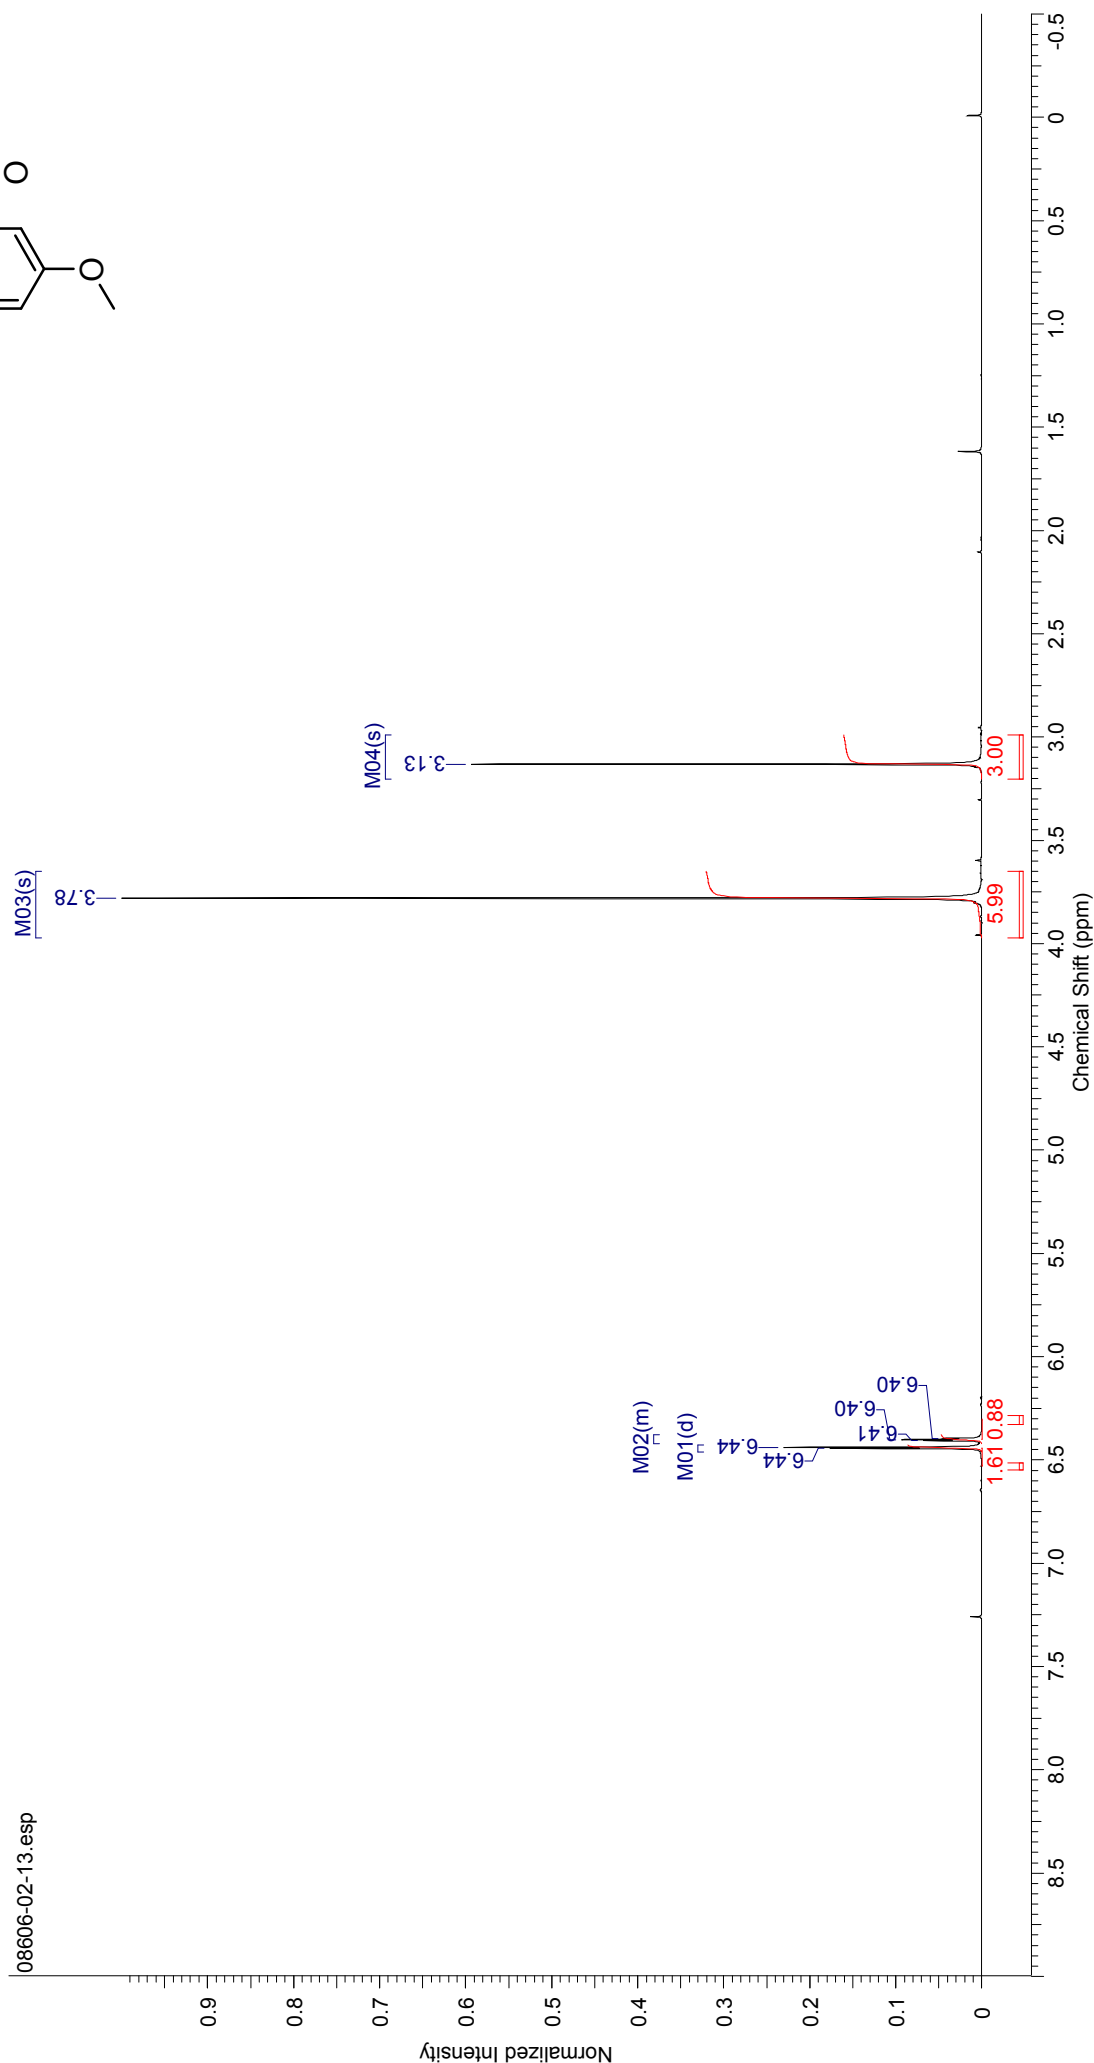

13C OBSERVE

Pulse Sequence: s2pul

Solvent: CDCl<sub>3</sub>

Ambient temperature

Mercury-400BB "6Fback"

Relax. delay 1.801 sec

Pulse 37.5 degrees

Acq. time 1.199 sec

Width 25000.0 Hz

224 repetitions

OBSERVE C13, 100.5606118 MHz

DECOUPLE H1, 399.9245689 MHz

Power 34 dB

continuously on

WALTZ-16 modulated

DATA PROCESSING

Line broadening 1.0 Hz

FT size 65536

Total time 1 hr, 47 min, 35 sec

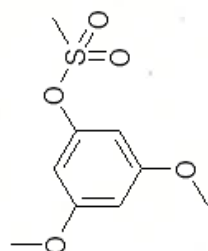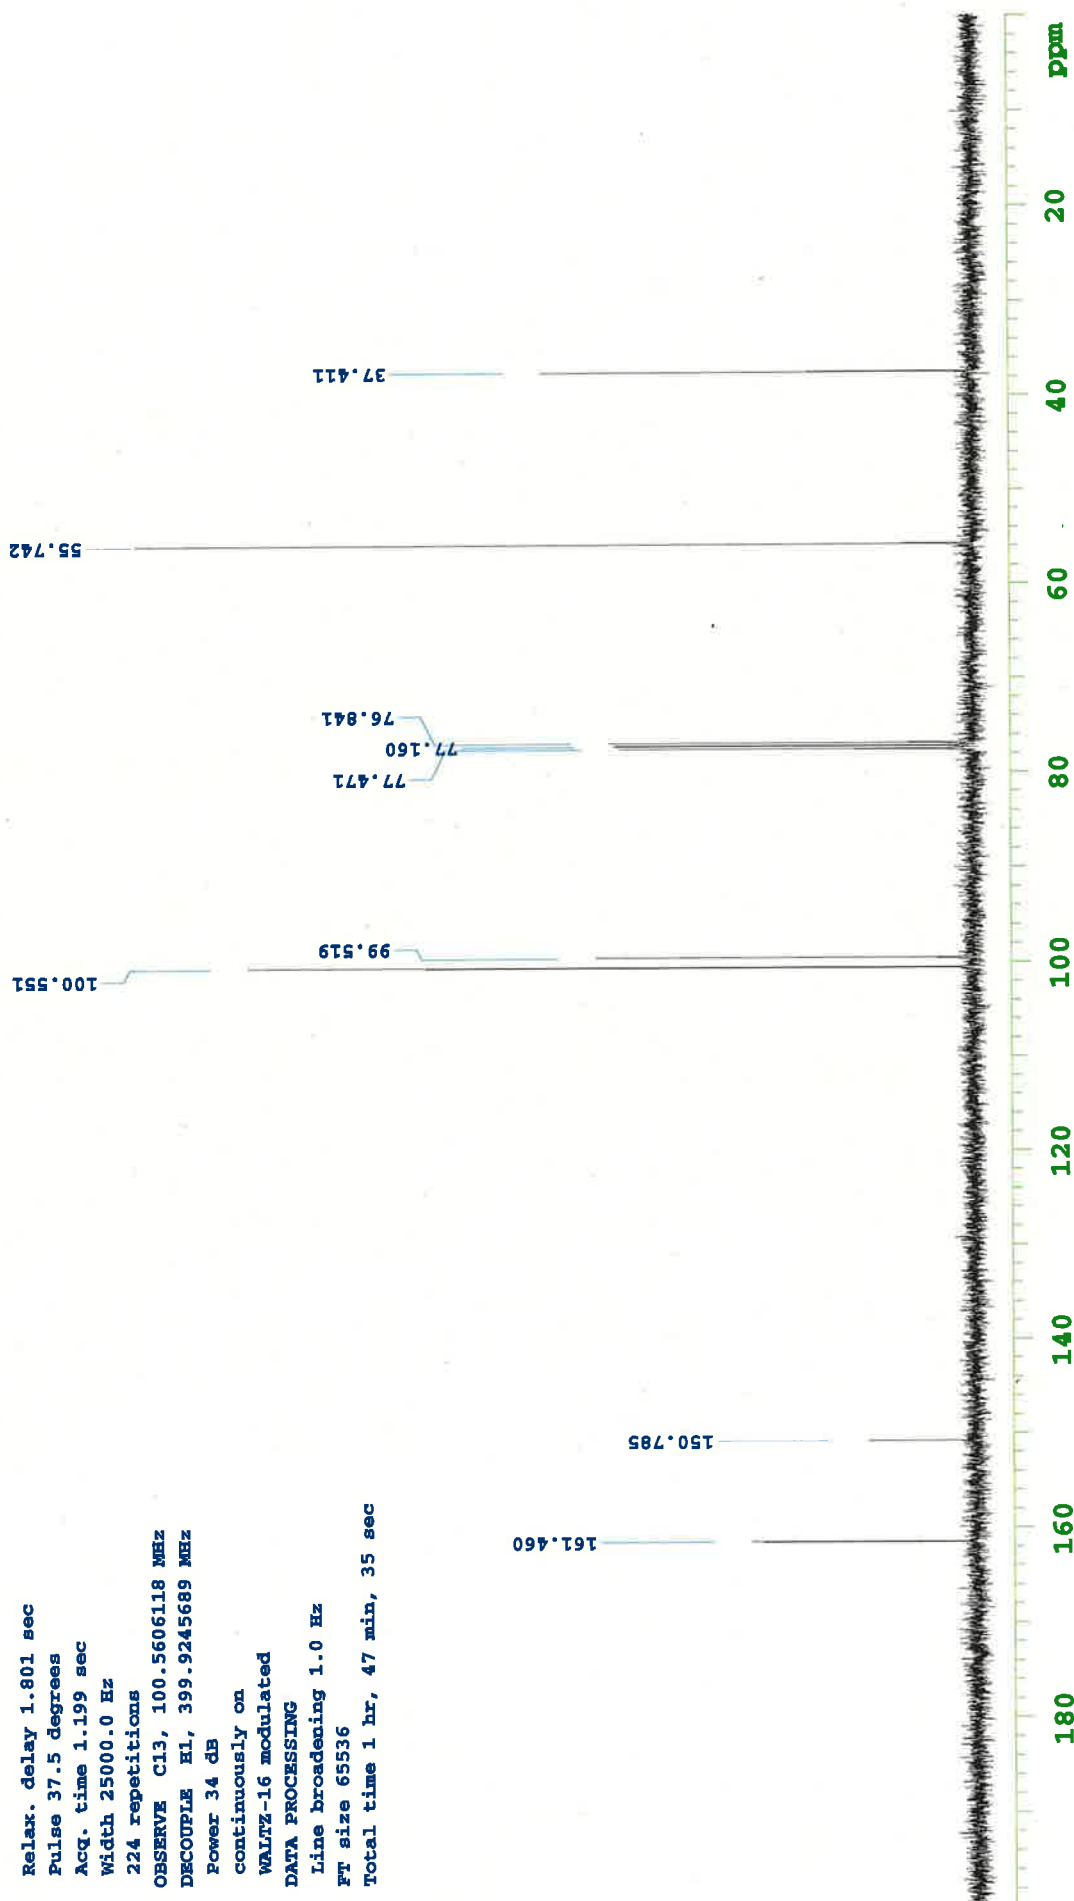

|         |                                                  |    |          |
|---------|--------------------------------------------------|----|----------|
| Formula | C <sub>15</sub> H <sub>16</sub> O <sub>5</sub> S | FW | 308.3495 |
|---------|--------------------------------------------------|----|----------|

| STANDARD 1H OBSERVE    |                 |                        |                     |
|------------------------|-----------------|------------------------|---------------------|
| Acquisition Time (sec) | 2.7320          | Comment                |                     |
| File Name              | C:\USRX\NMR\FID | Frequency (MHz)        | 399.92              |
| Original Points Count  | 16379           | Pulse Sequence         | s2pul               |
| Spectrum Offset (Hz)   | 2247.6414       | Spectrum Type          | STANDARD            |
|                        |                 | Sweep Width (Hz)       | 5995.20             |
|                        |                 | Temperature (degree C) | AMBIENT TEMPERATURE |
|                        |                 | Receiver Gain          | 6.00                |
|                        |                 | Nucleus                | 1H                  |
|                        |                 | Date                   | Feb 25 2012         |
|                        |                 | Date Stamp             | Feb 25 2012         |
|                        |                 | Number of Transients   | 32                  |
|                        |                 | Solvent                | CHLOROFORM-d        |

<sup>1</sup>H NMR (400 MHz, CHLOROFORM-d)  $\delta$  7.74 (d,  $J=8.42$  Hz, 2H), 7.31 (d,  $J=8.05$  Hz, 2H), 6.32 (t,  $J=2.20$  Hz, 1H), 6.14 (d,  $J=2.20$  Hz, 2H), 3.68 (s, 7H), 2.44 (s, 3H)

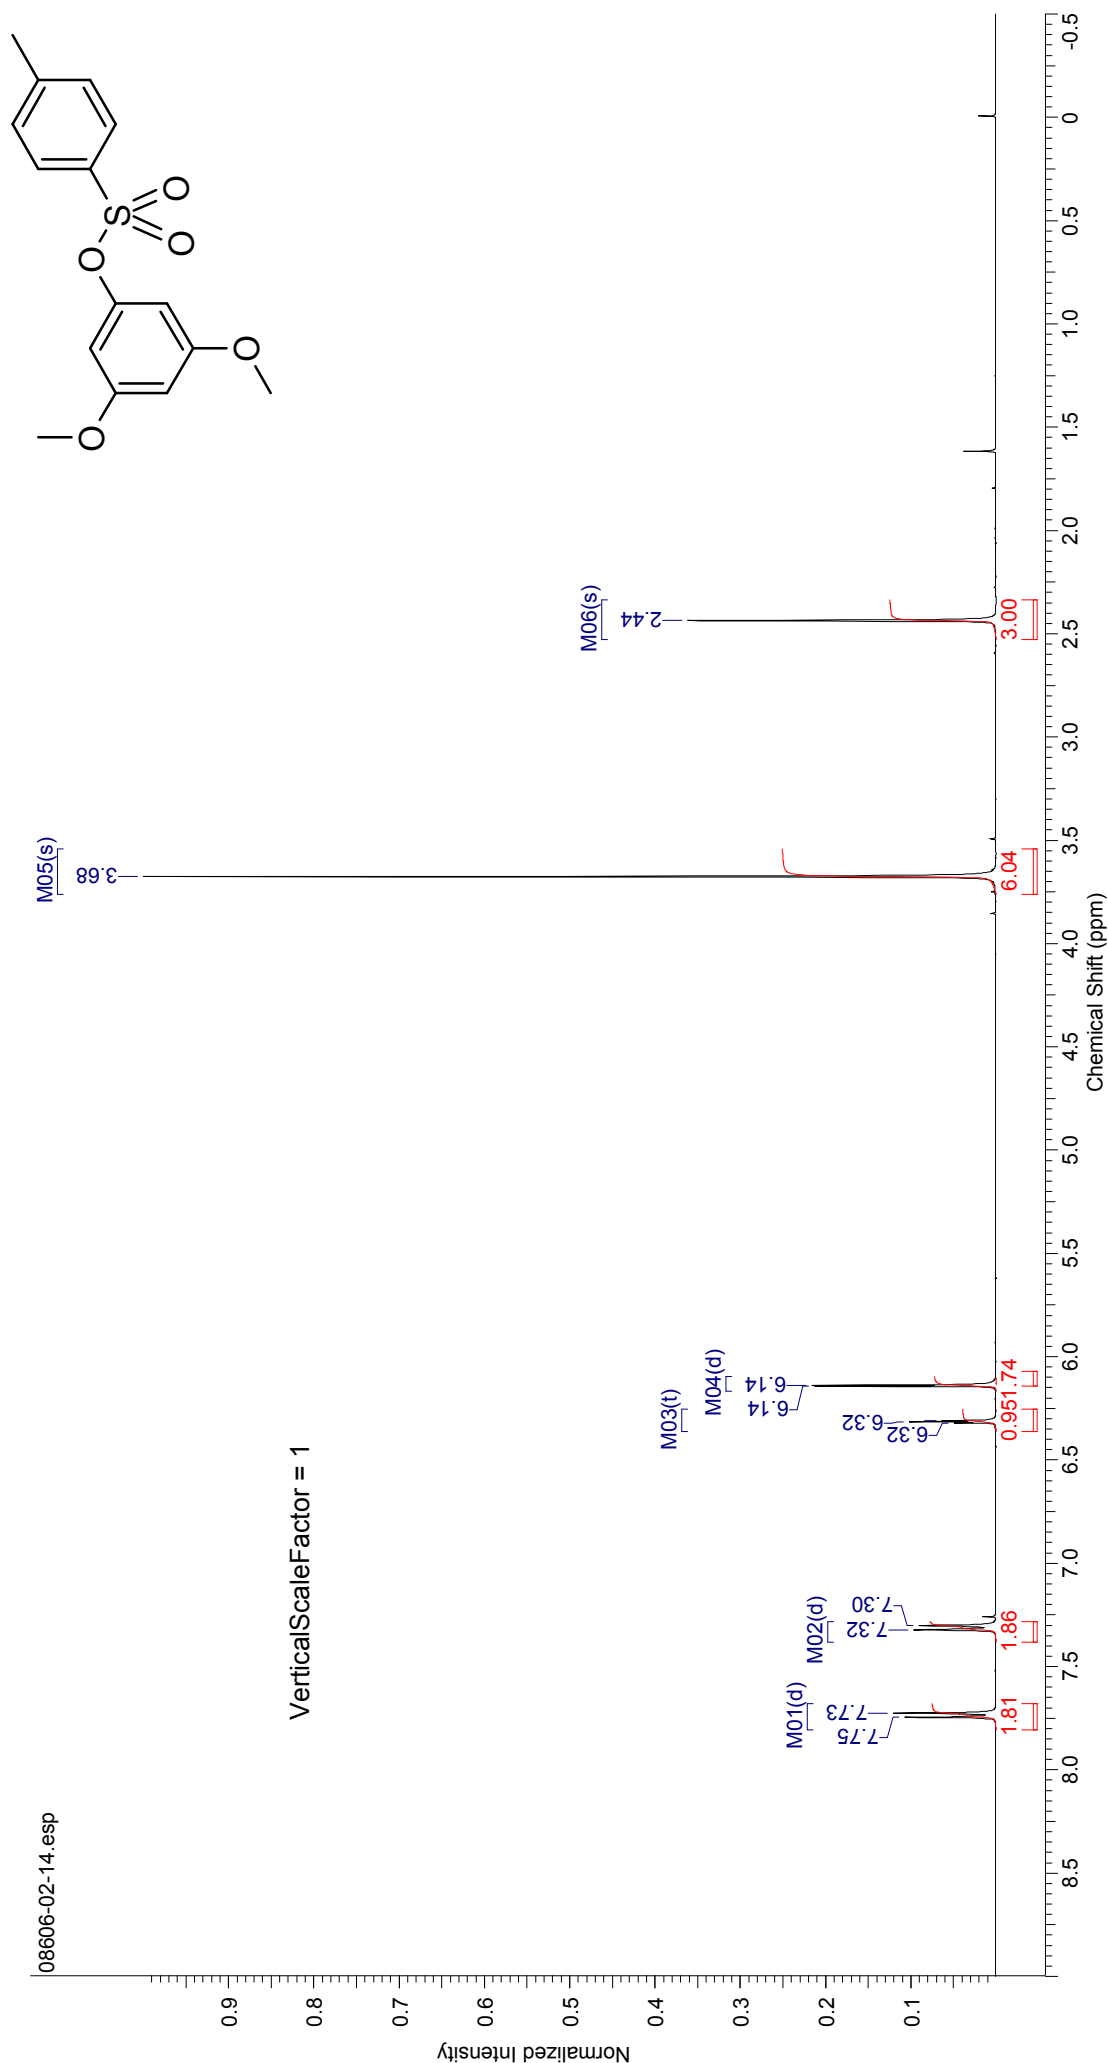

13C OBSERVE

Pulse Sequence: s2pul

Solvent: CDC13

Ambient temperature

Mercury-400BB "6Fback"

Relax. delay 1.801 sec

Pulse 37.5 degrees

Acq. time 1.199 sec

Width 25000.0 Hz

192 repetitions

OBSERVE C13, 100.5606110 MHz

DECOUPLE H1, 399.9245689 MHz

Power 34 dB

continuously on

WALTZ-16 modulated

DATA PROCESSING

Line broadening 1.0 Hz

FT size 65536

Total time 1 hr, 47 min, 35 sec

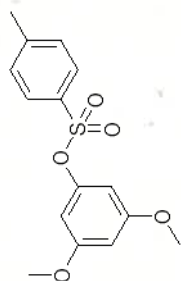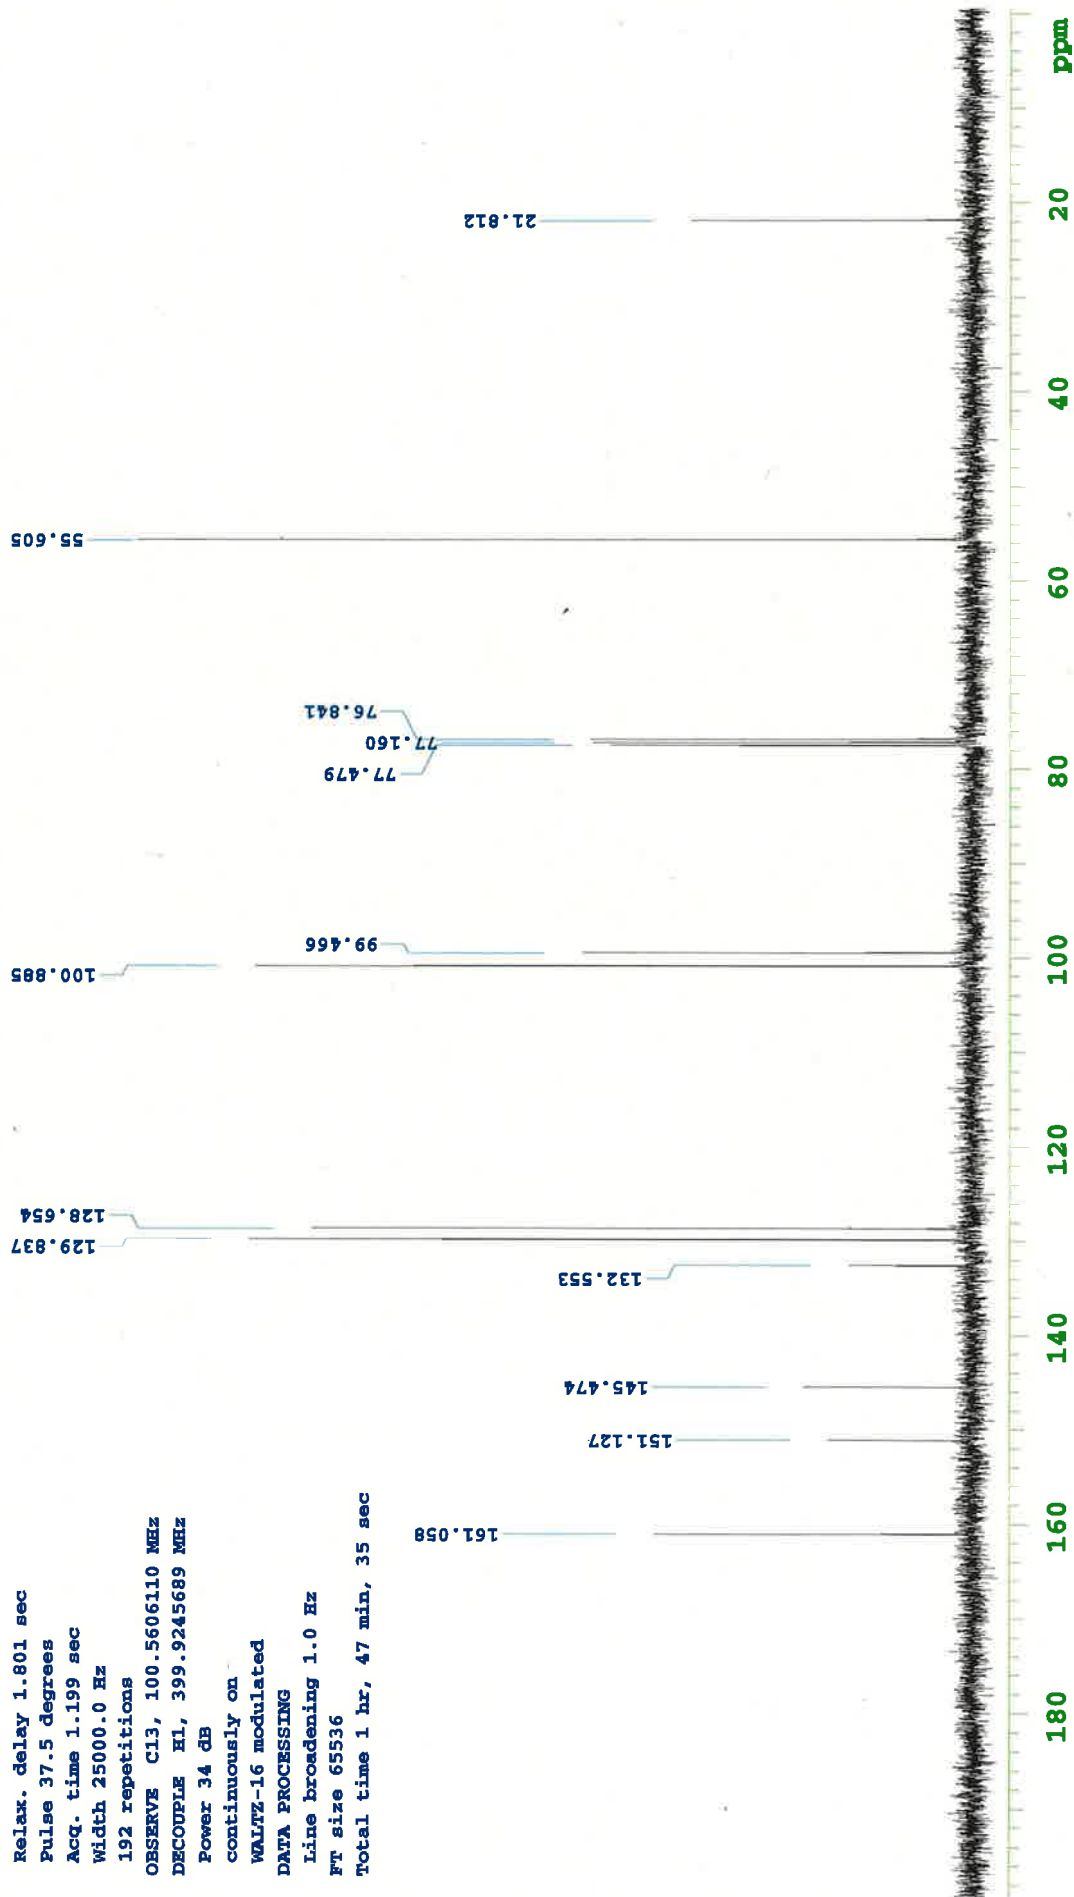

|                        |                 |               |                     |                        |                     |                      |              |
|------------------------|-----------------|---------------|---------------------|------------------------|---------------------|----------------------|--------------|
| Acquisition Time (sec) | 2.7320          | Comment       | STANDARD 1H OBSERVE | Date                   | Feb 25 2012         | Date Stamp           | Feb 25 2012  |
| File Name              | C:\USRX\NMR\FID |               | Frequency (MHz)     | Nucleus                | 1H                  | Number of Transients | 32           |
| Original Points Count  | 16379           | Points Count  | Pulse Sequence      | Receiver Gain          | 16.00               | Solvent              | CHLOROFORM-d |
| Spectrum Offset (Hz)   | 2252.1809       | Spectrum Type | Sweep Width (Hz)    | Temperature (degree C) | AMBIENT TEMPERATURE |                      |              |

<sup>1</sup>H NMR (400 MHz, CHLOROFORM-d)  $\delta$  7.62-7.68 (m, 1H), 7.53-7.61 (m, 3H), 3.23 (s, 3H)

VerticalScaleFactor = 1

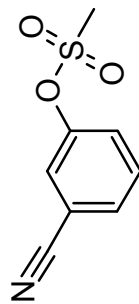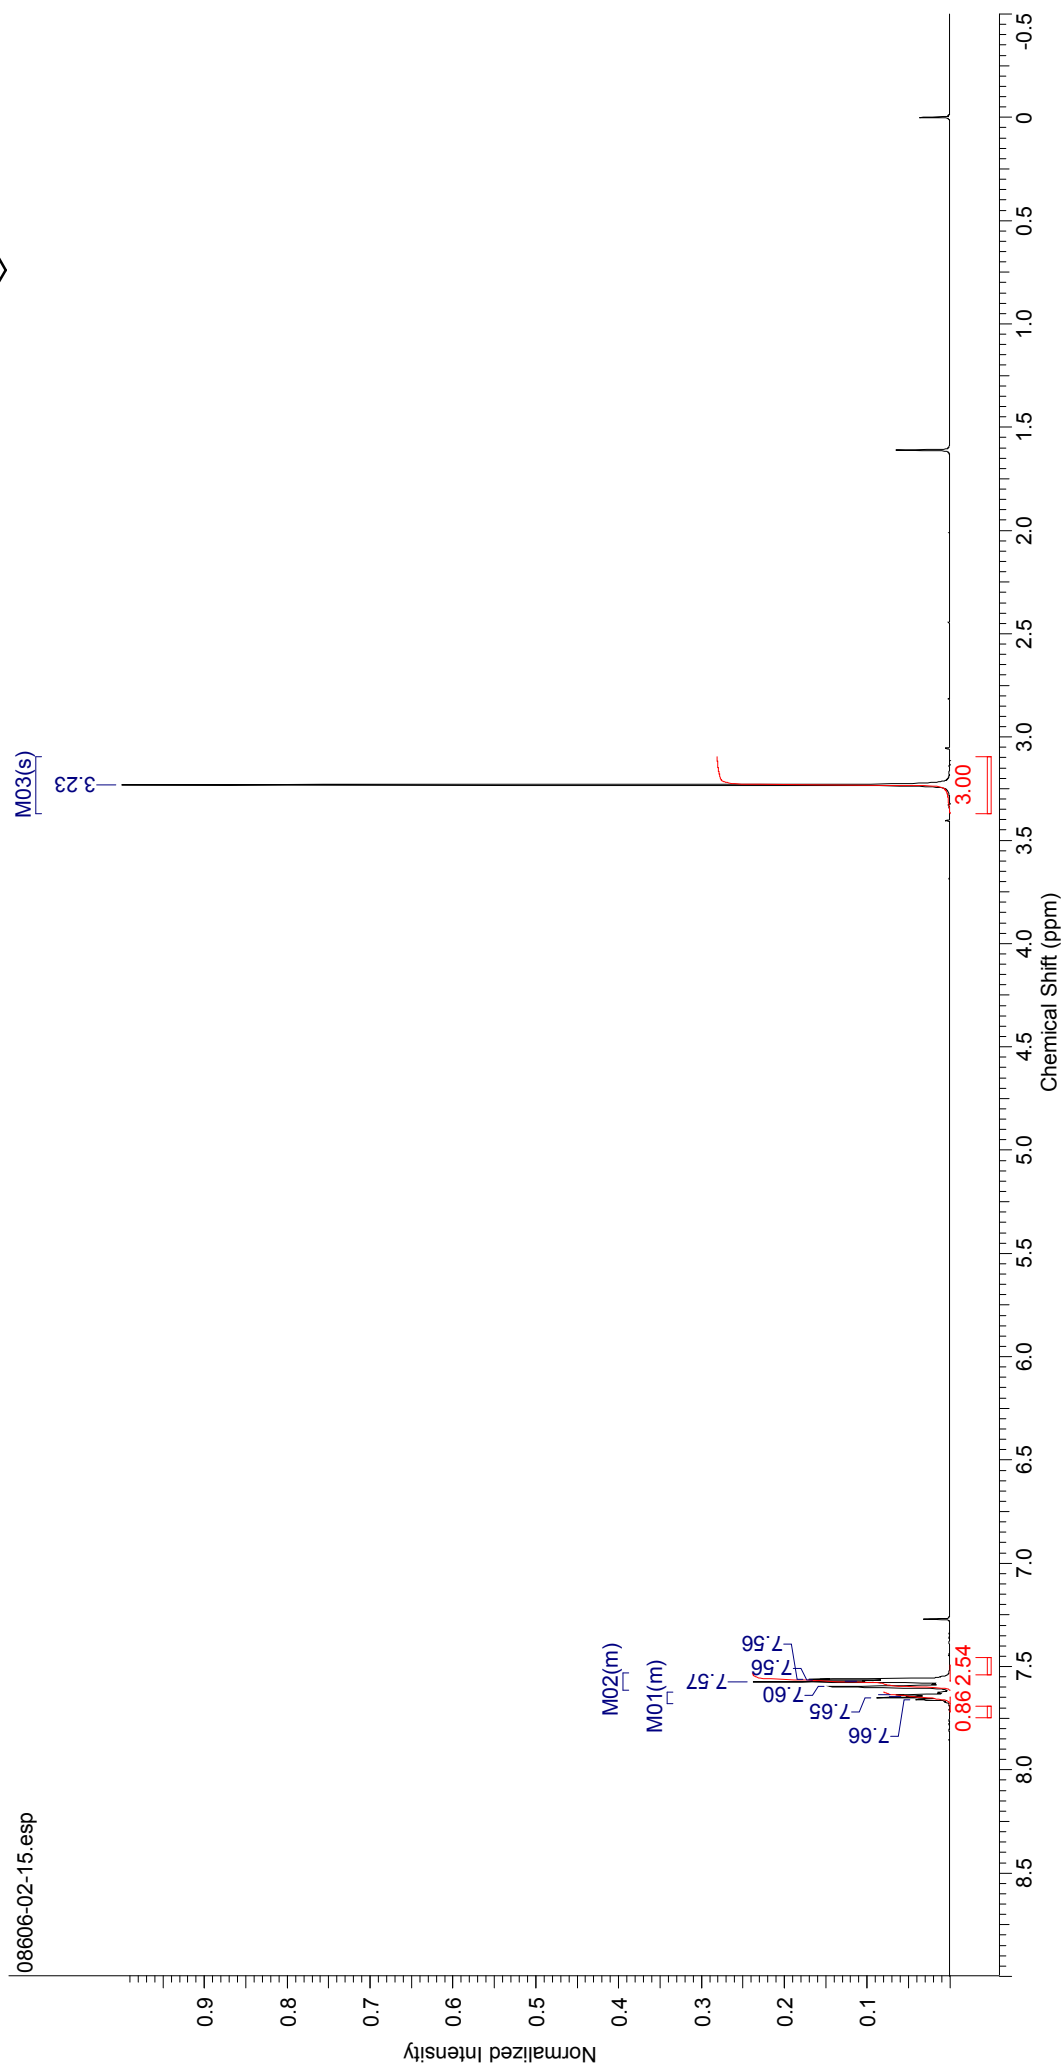

13C OBSERVE

Pulse Sequence: s2pul

Solvent: CDCl3

Ambient temperature

Mercury-400BB "6Fback"

Relax. delay 1.801 sec

Pulse 37.5 degrees

Acq. time 1.199 sec

Width 25000.0 Hz

192 repetitions

OBSERVE C13, 100.5606110 MHz

DECOUPLE H1, 399.9245689 MHz

Power 34 dB

continuously on

WALTZ-16 modulated

DATA PROCESSING

Line broadening 1.0 Hz

FT size 65536

Total time 1 hr, 47 min, 35 sec

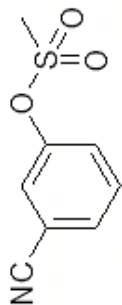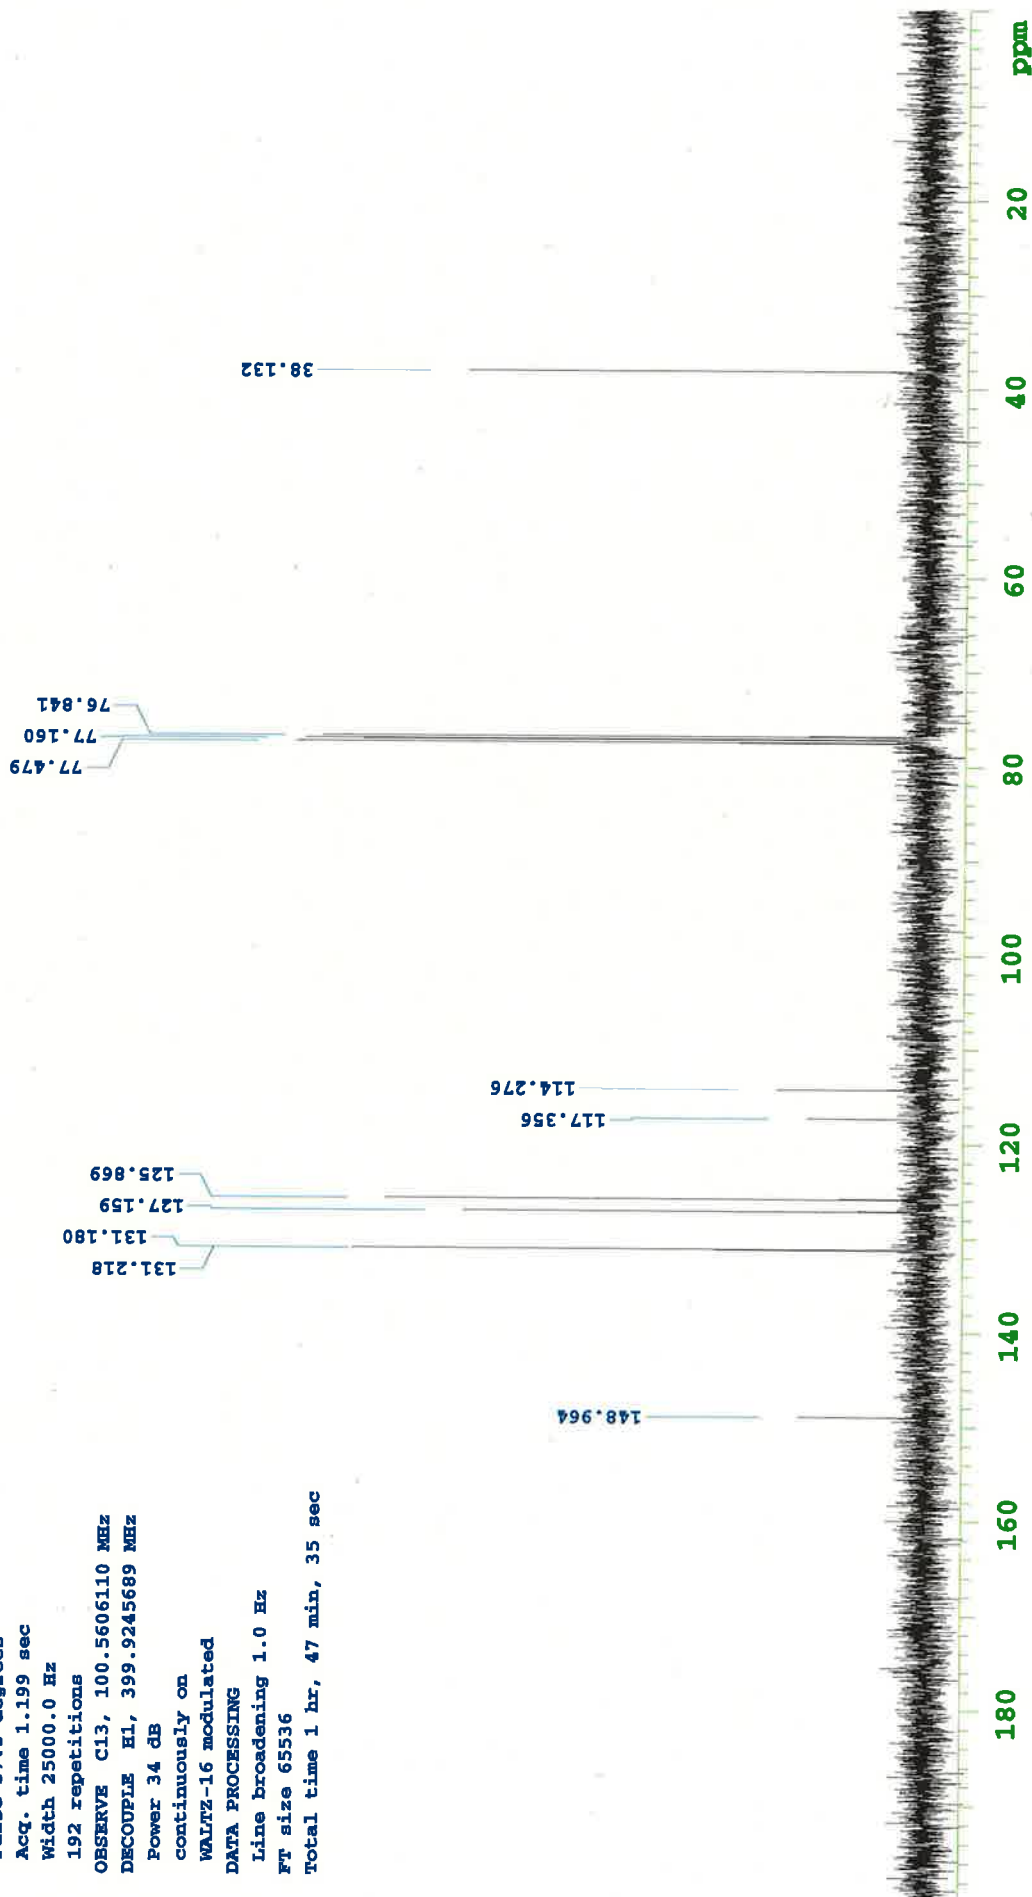

|         |                                                   |    |          |
|---------|---------------------------------------------------|----|----------|
| Formula | C <sub>14</sub> H <sub>11</sub> NO <sub>3</sub> S | FW | 273.3070 |
|---------|---------------------------------------------------|----|----------|

|                        |                 |               |                     |                        |         |               |                     |
|------------------------|-----------------|---------------|---------------------|------------------------|---------|---------------|---------------------|
| Acquisition Time (sec) | 2.7320          | Comment       | STANDARD 1H OBSERVE |                        |         |               |                     |
| File Name              | C:\USRX\NMR\FID |               | Frequency (MHz)     | 399.92                 | Date    | Feb 25 2012   |                     |
| Original Points Count  | 16379           | Points Count  | 16384               | Pulse Sequence         | s2pul   | Nucleus       | 1H                  |
| Spectrum Offset (Hz)   | 2254.3765       | Spectrum Type | STANDARD            | Sweep Width (Hz)       | 5995.20 | Receiver Gain | 6.00                |
|                        |                 |               |                     | Temperature (degree C) |         |               | AMBIENT TEMPERATURE |
|                        |                 |               |                     | Solvent                |         |               | CHLOROFORM-d        |

<sup>1</sup>H NMR (400 MHz, CHLOROFORM-d) δ 7.71 (d, *J*=8.42 Hz, 2H), 7.53-7.61 (m, 1H), 7.45 (t, *J*=7.87 Hz, 1H), 7.36 (d, *J*=8.42 Hz, 2H), 7.28-7.33 (m, 1H), 7.24-7.27 (m, 1H), 2.48 (s, 3H)

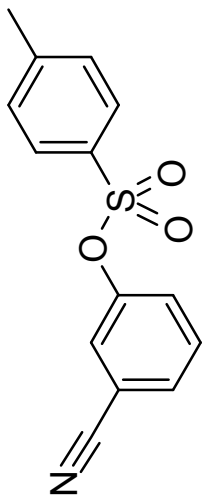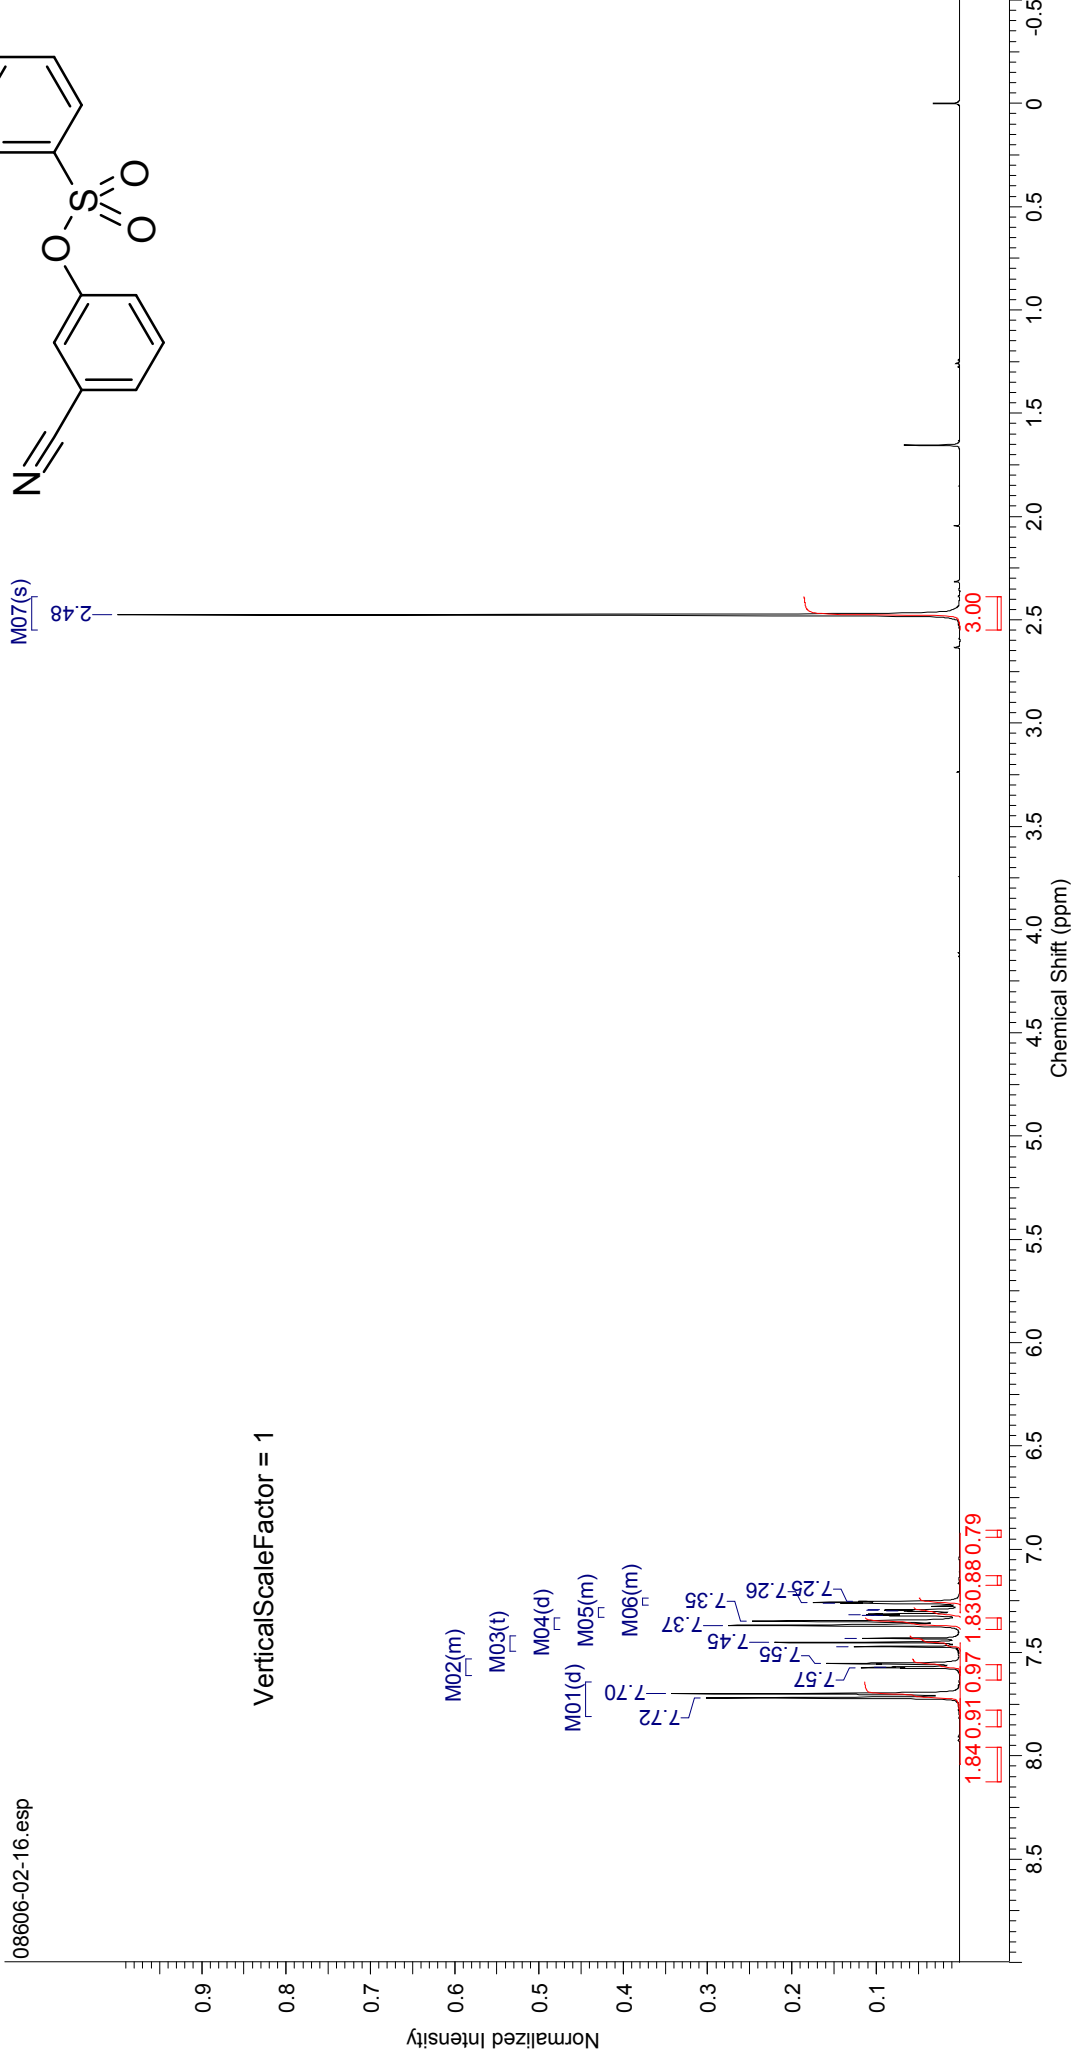

13C OBSERVE

Pulse Sequence: s2pul

Solvent: CDC13

Ambient temperature

Mercury-400BB "6fback"

Relax. delay 1.801 sec

Pulse 37.5 degrees

Acq. time 1.199 sec

Width 25000.0 Hz

352 repetitions

OBSERVE C13, 100.5606141 MHz

DECOUPLE H1, 399.9245689 MHz

Power 34 dB

continuously on

WALTZ-16 modulated

DATA PROCESSING

Line broadening 1.0 Hz

FT size 65536

Total time 1 hr, 47 min, 35 sec

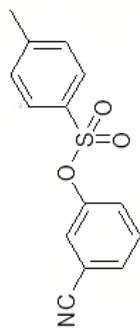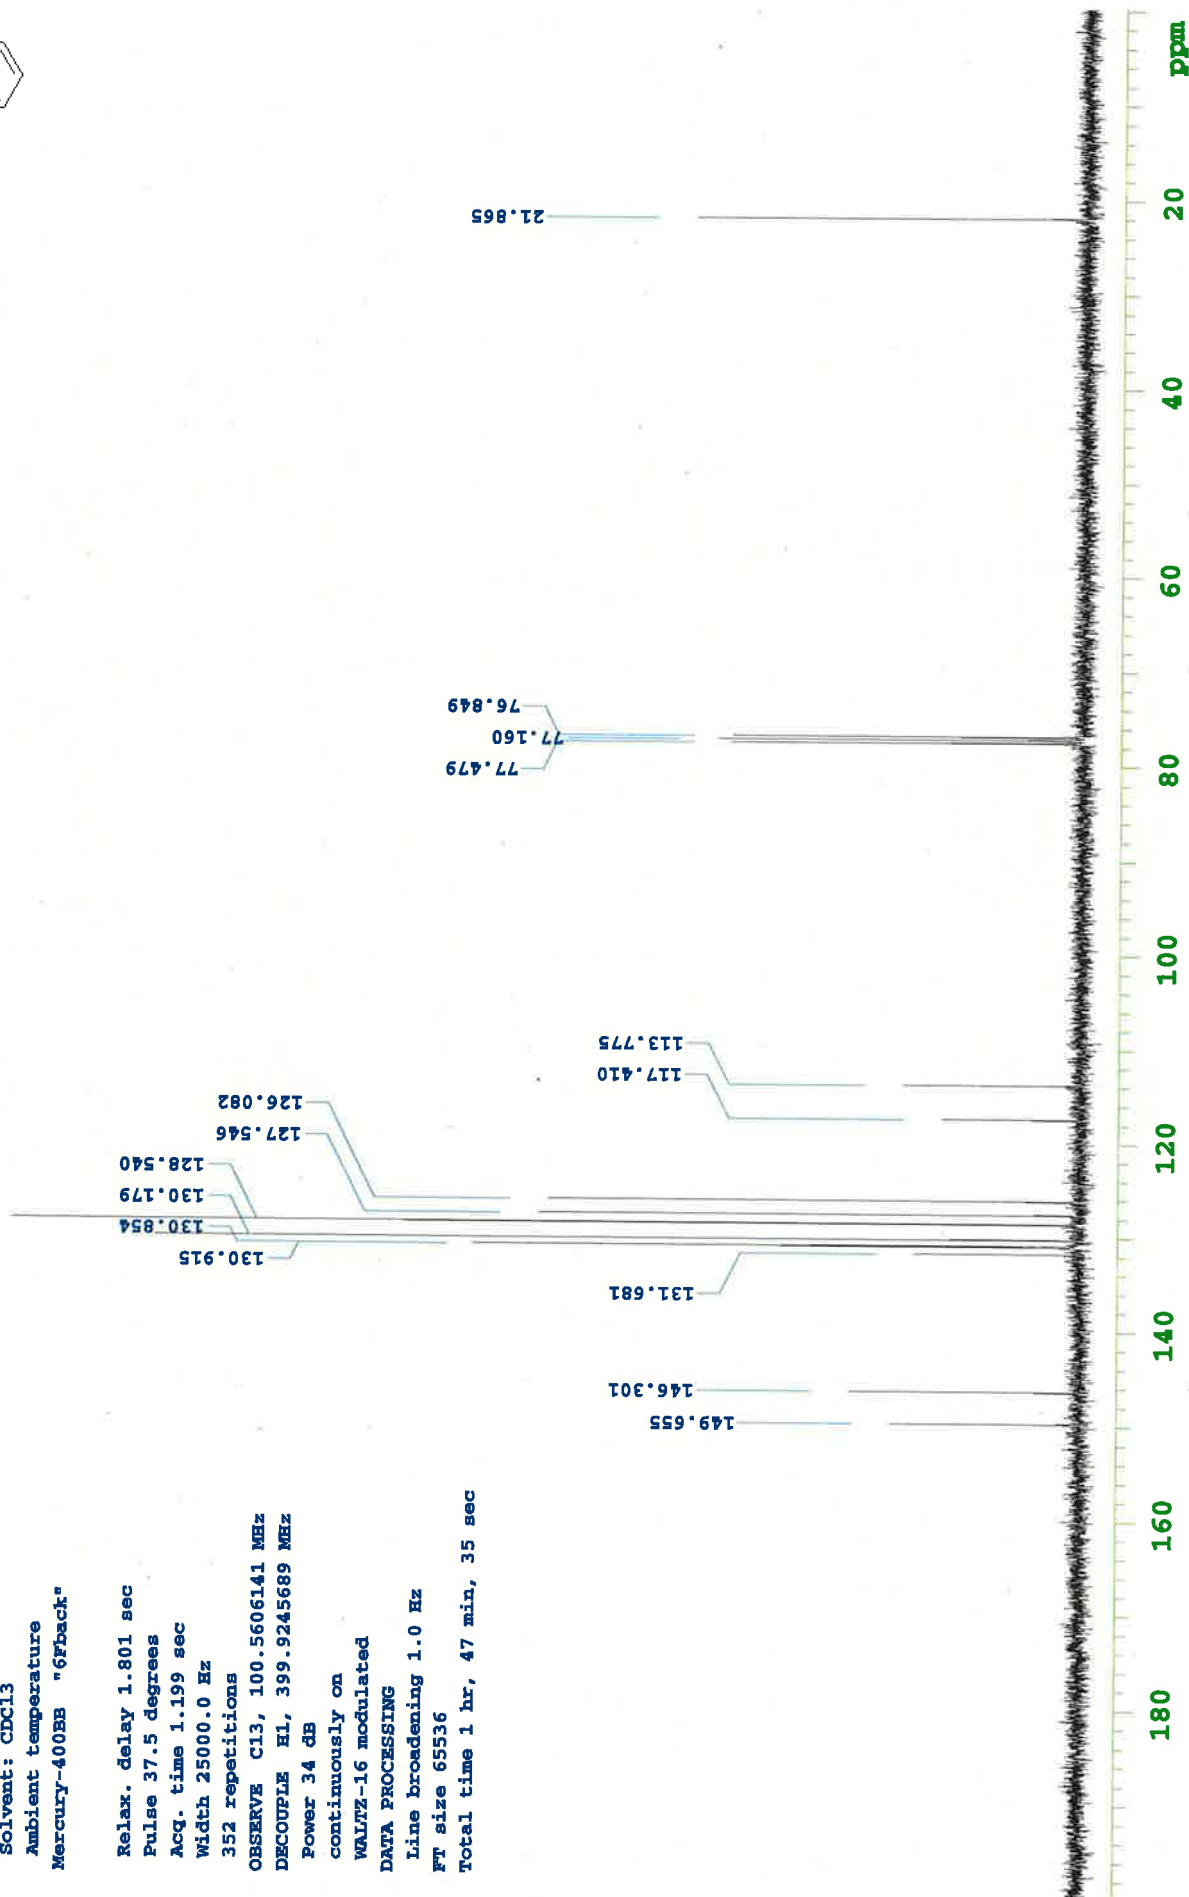

|                        |                 |               |                     |         |                        |                     |             |                      |              |
|------------------------|-----------------|---------------|---------------------|---------|------------------------|---------------------|-------------|----------------------|--------------|
| Acquisition Time (sec) | 2.7320          | Comment       | STANDARD 1H OBSERVE |         |                        | Date                | Feb 25 2012 | Date Stamp           | Feb 25 2012  |
| File Name              | C:\USRX\NMR\FID |               | Frequency (MHz)     | 399.92  | Nucleus                | 1H                  |             | Number of Transients | 32           |
| Original Points Count  | 16379           | Points Count  | Pulse Sequence      | s2pul   | Receiver Gain          | 10.00               |             | Solvent              | CHLOROFORM-d |
| Spectrum Offset (Hz)   | 2257.6699       | Spectrum Type | Sweep Width (Hz)    | 5995.20 | Temperature (degree C) | AMBIENT TEMPERATURE |             |                      |              |

<sup>1</sup>H NMR (400 MHz, CHLOROFORM-d)  $\delta$  8.96 (dd,  $J$ =1.65, 4.21 Hz, 1H), 8.14-8.21 (m, 2H), 7.78 (d,  $J$ =2.56 Hz, 1H), 7.63 (dd,  $J$ =2.56, 9.15 Hz, 1H), 7.47 (dd,  $J$ =4.21, 8.23 Hz, 1H), 3.23 (s, 3H)  
VerticalScaleFactor = 1

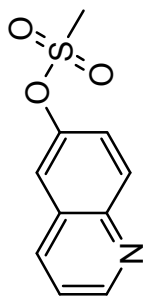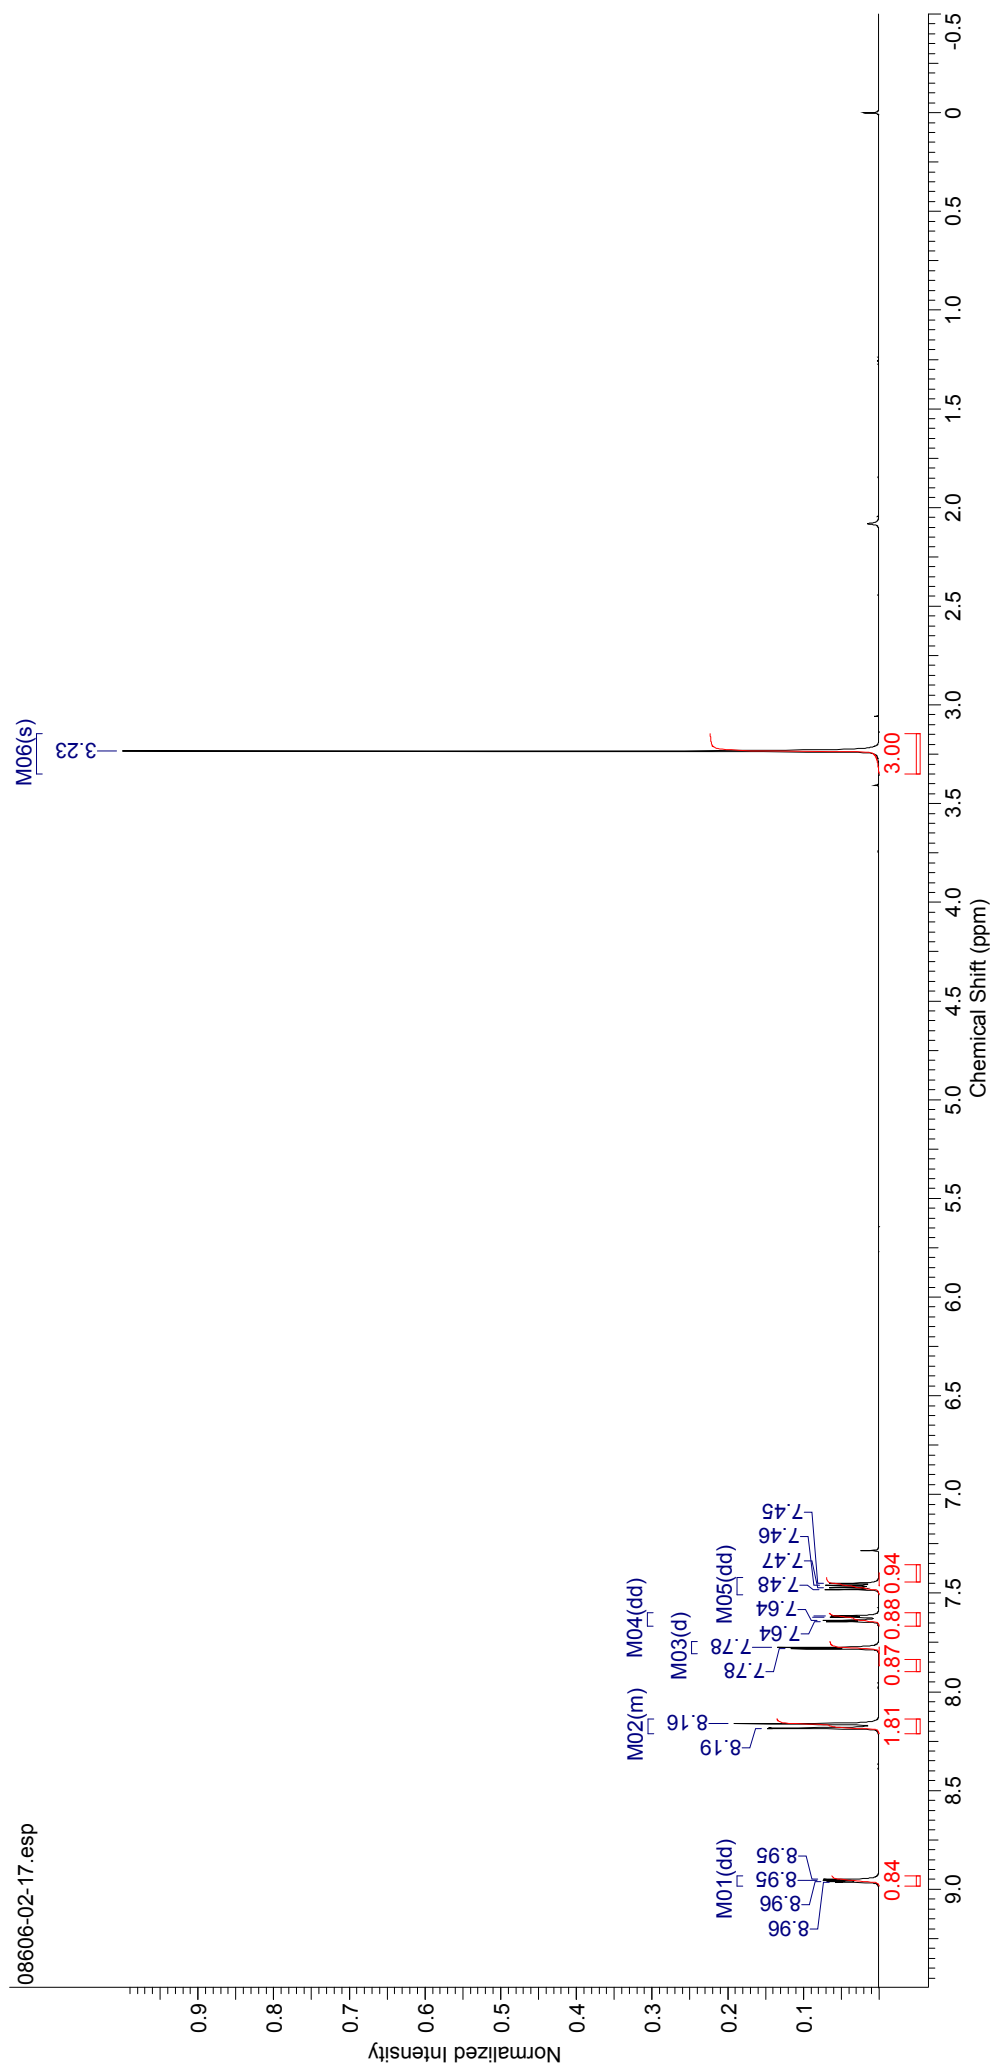

13C OBSERVE

Pulse Sequence: s2pul

Solvent: CDCl3

Ambient temperature

Mercury-400BB "6fback"

Relax. delay 1.801 sec

Pulse 37.5 degrees

Acq. time 1.199 sec

Width 25000.0 Hz

192 repetitions

OBSERVE C13, 100.5606133 MHz

DECOUPLE H1, 399.9245689 MHz

Power 34 dB

continuously on

WALTZ-16 modulated

DATA PROCESSING

Line broadening 1.0 Hz

FT size 65536

Total time 52 min, 44 sec

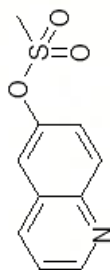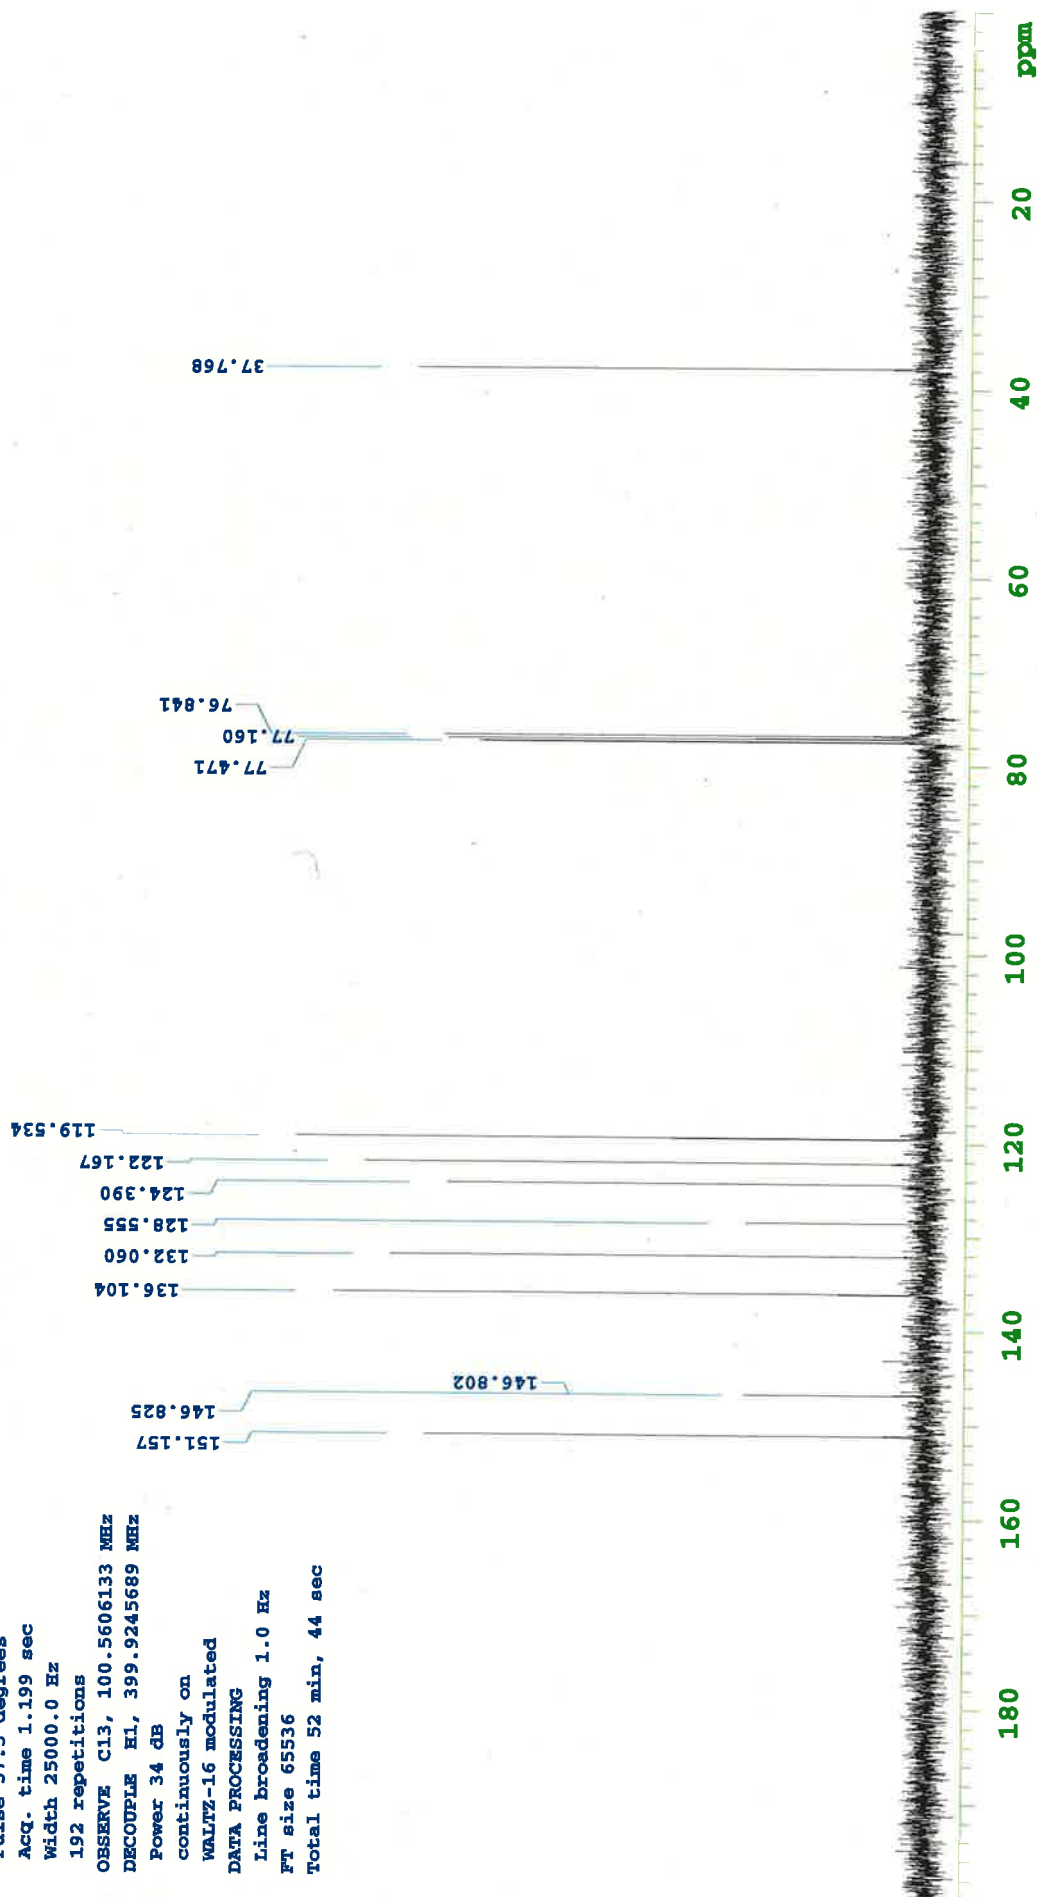

|                        |                 |               |                     |         |                        |                     |                      |              |
|------------------------|-----------------|---------------|---------------------|---------|------------------------|---------------------|----------------------|--------------|
| Acquisition Time (sec) | 2.7320          | Comment       | STANDARD 1H OBSERVE |         | Date                   | Feb 25 2012         | Date Stamp           | Feb 25 2012  |
| File Name              | C:\USRX\NMR\FID |               | Frequency (MHz)     | 399.92  | Nucleus                | 1H                  | Number of Transients | 32           |
| Original Points Count  | 16379           | Points Count  | Pulse Sequence      | s2pul   | Receiver Gain          | 6.00                | Solvent              | CHLOROFORM-d |
| Spectrum Offset (Hz)   | 2257.3042       | Spectrum Type | Sweep Width (Hz)    | 5995.20 | Temperature (degree C) | AMBIENT TEMPERATURE |                      |              |

<sup>1</sup>H NMR (400 MHz, CHLOROFORM-d)  $\delta$  8.92 (dd,  $J=1.65, 4.21$  Hz, 1H), 8.09 (dd,  $J=1.10, 8.42$  Hz, 1H), 8.01 (d,  $J=9.15$  Hz, 1H), 7.73 (d,  $J=8.42$  Hz, 2H), 7.55 (d,  $J=2.56$  Hz, 1H), 7.42 (dd,  $J=4.21, 8.23$  Hz, 1H), 7.22-7.34 (m, 3H), 2.44 (s, 3H)

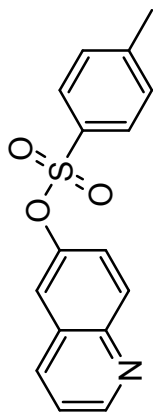

VerticalScaleFactor = 1

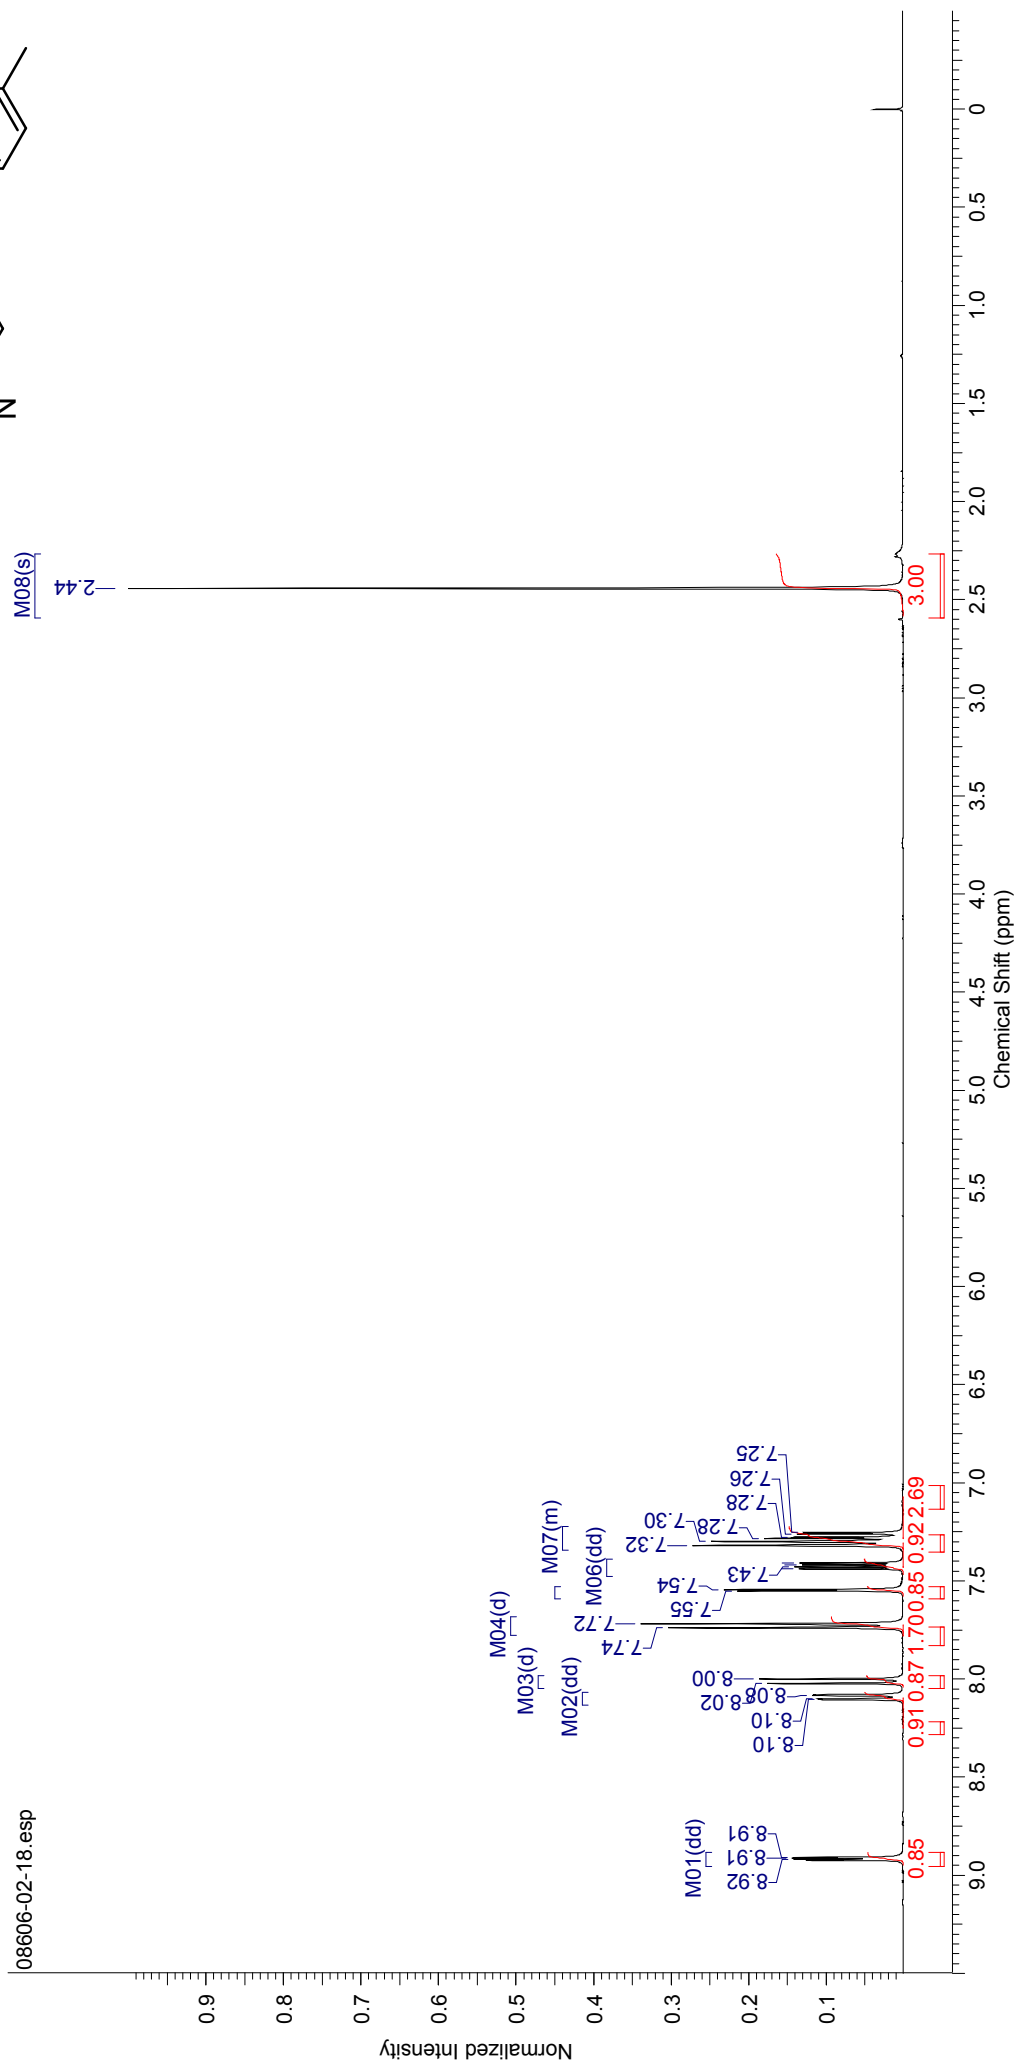

13C OBSERVE

Pulse Sequence: s2pul

Solvent: CDCl3

Ambient temperature

Mercury-400DB "6fback"

Relax. delay 1.801 sec

Pulse 37.5 degrees

Acq. time 1.199 sec

Width 25000.0 Hz

352 repetitions

OBSERVE C13, 100.5606133 MHz

DECOUPLE H1, 399.9245689 MHz

Power 34 dB

continuously on

WALTZ-16 modulated

DATA PROCESSING

Line broadening 1.0 Hz

FT size 65536

Total time 1 hr, 47 min, 35 sec

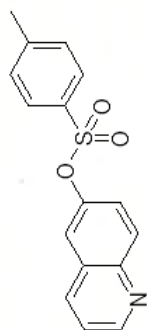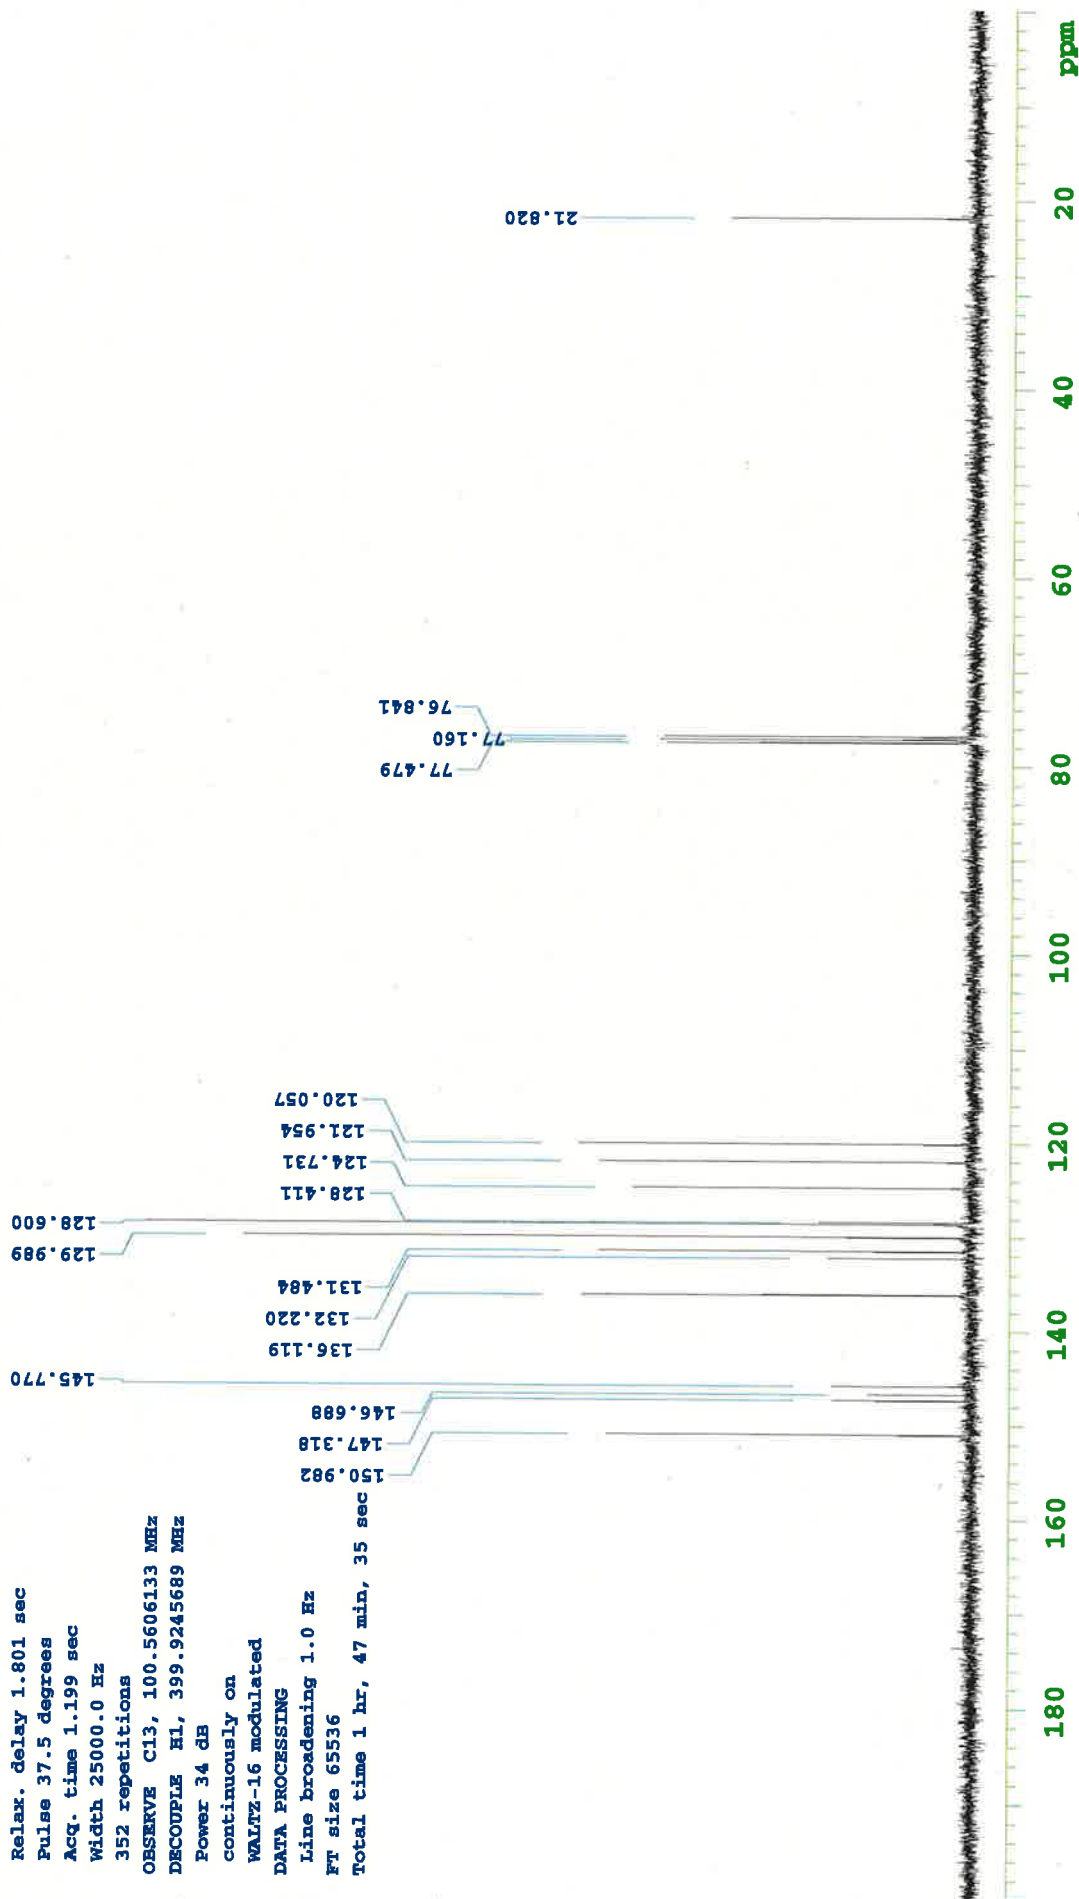

|         |                                                              |    |          |
|---------|--------------------------------------------------------------|----|----------|
| Formula | C <sub>9</sub> H <sub>9</sub> NO <sub>3</sub> S <sub>2</sub> | FW | 243.3027 |
|---------|--------------------------------------------------------------|----|----------|

|                        |                |               |                     |                        |         |               |                     |
|------------------------|----------------|---------------|---------------------|------------------------|---------|---------------|---------------------|
| Acquisition Time (sec) | 2.7320         | Comment       | STANDARD 1H OBSERVE |                        |         |               |                     |
| File Name              | C:\USR\NMR\FID |               | Frequency (MHz)     | 399.92                 | Date    | Feb 25 2012   |                     |
| Original Points Count  | 16379          | Points Count  | 16384               | Pulse Sequence         | s2pul   | Nucleus       | 1H                  |
| Spectrum Offset (Hz)   | 2255.8403      | Spectrum Type | STANDARD            | Sweep Width (Hz)       | 5995.20 | Receiver Gain | 10.00               |
|                        |                |               |                     | Temperature (degree C) |         |               | AMBIENT TEMPERATURE |
|                        |                |               |                     | Solvent                |         |               | CHLOROFORM-d        |
|                        |                |               |                     | Number of Transients   |         |               | 32                  |
|                        |                |               |                     | Date Stamp             |         |               | Feb 25 2012         |

<sup>1</sup>H NMR (400 MHz, CHLOROFORM-d)  $\delta$  7.74-7.94 (m, 2H), 7.33 (dd, *J*=2.20, 8.78 Hz, 1H), 3.19 (s, 3H), 2.85 (s, 3H)

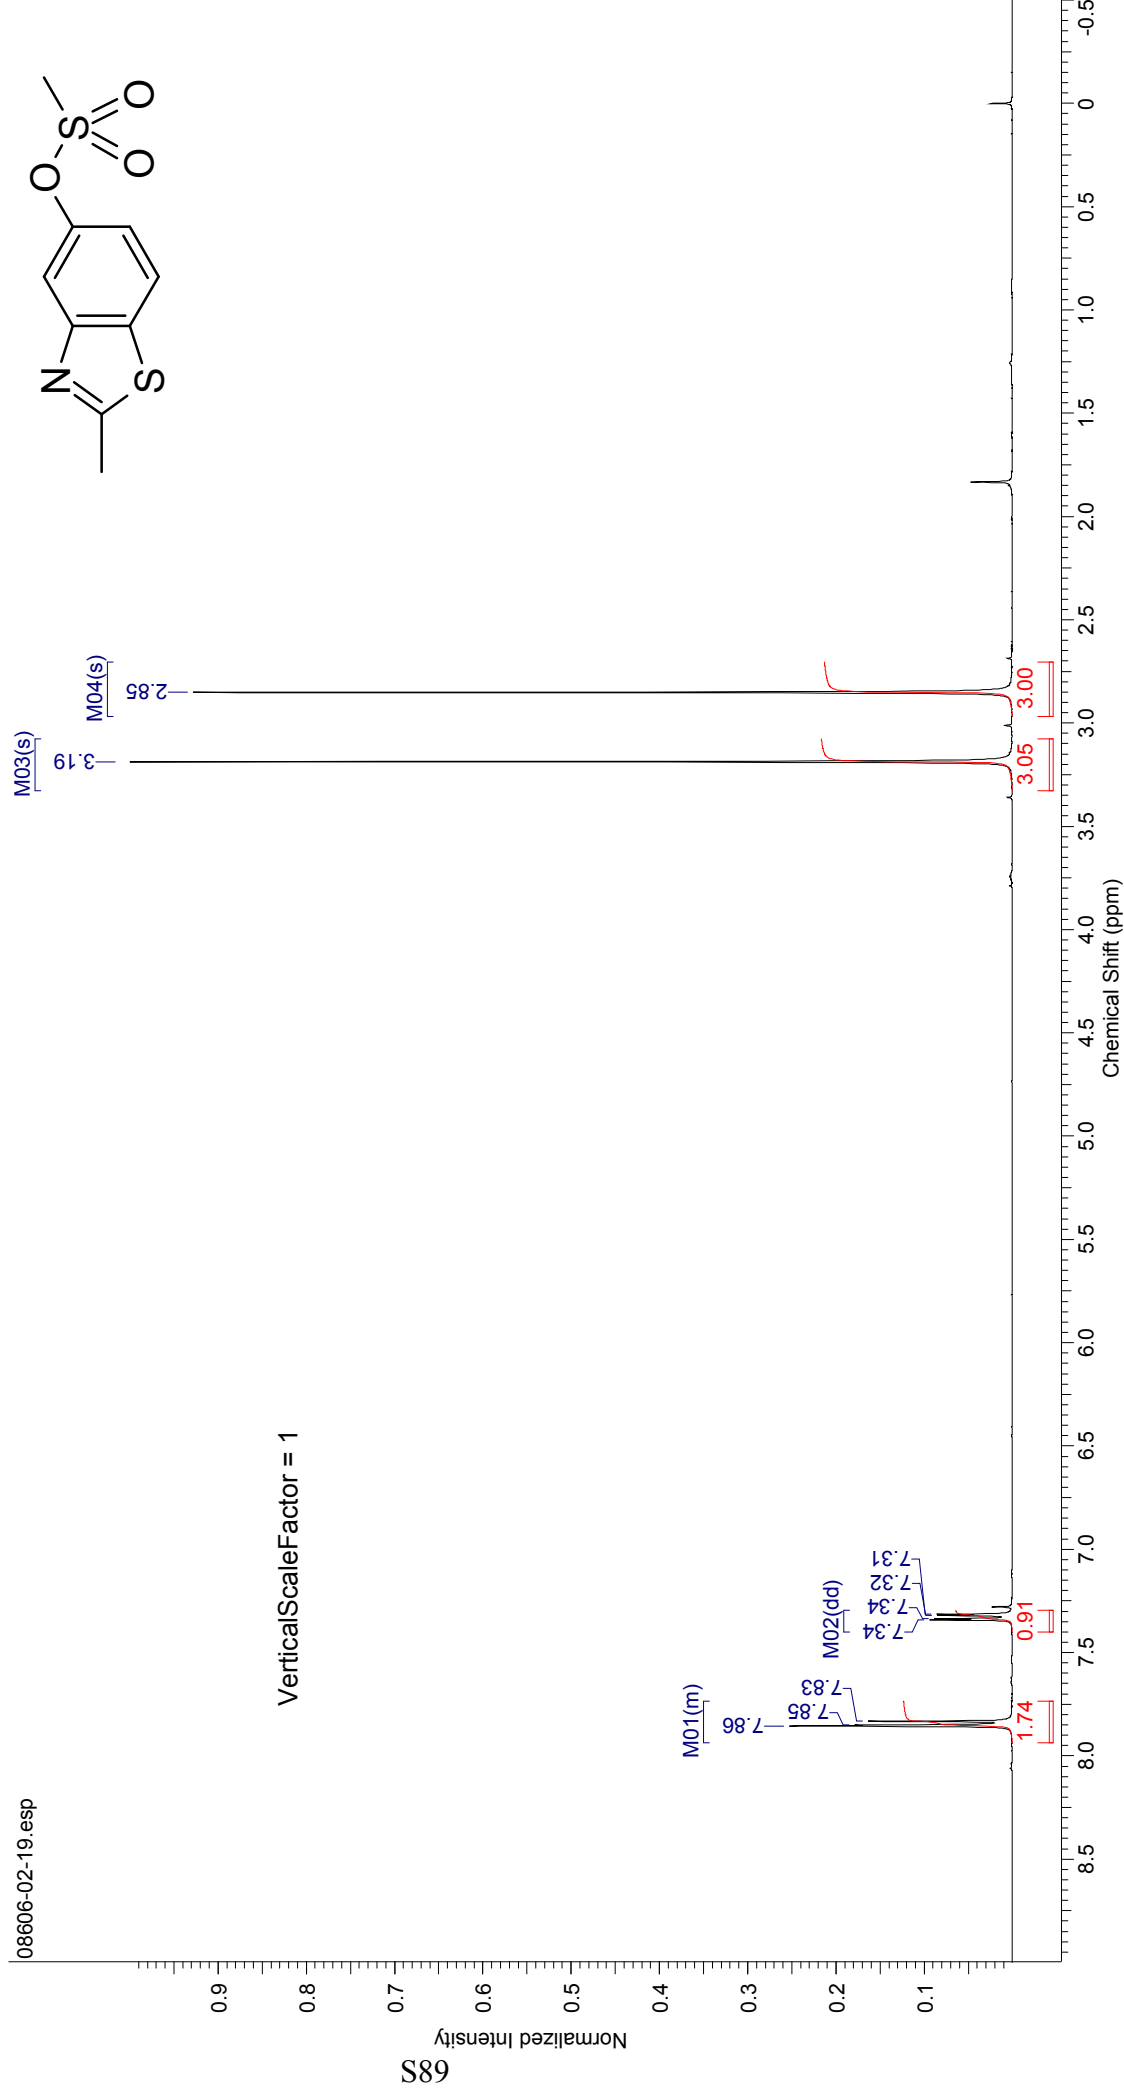

13C OBSERVE

Pulse Sequence: s2pul

Solvent: CDCl3

Ambient temperature

Mercury-400BB "6fback"

Relax. delay 1.801 sec

Pulse 37.5 degrees

Acq. time 1.199 sec

Width 25000.0 Hz

416 repetitions

OBSERVE C13, 100.5606133 MHz

DECOUPLE H1, 399.9245689 MHz

Power 34 dB

continuously on

WALTZ-16 modulated

DATA PROCESSING

Line broadening 1.0 Hz

FT size 65536

Total time 1 hr, 47 min, 35 sec

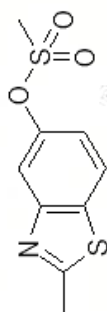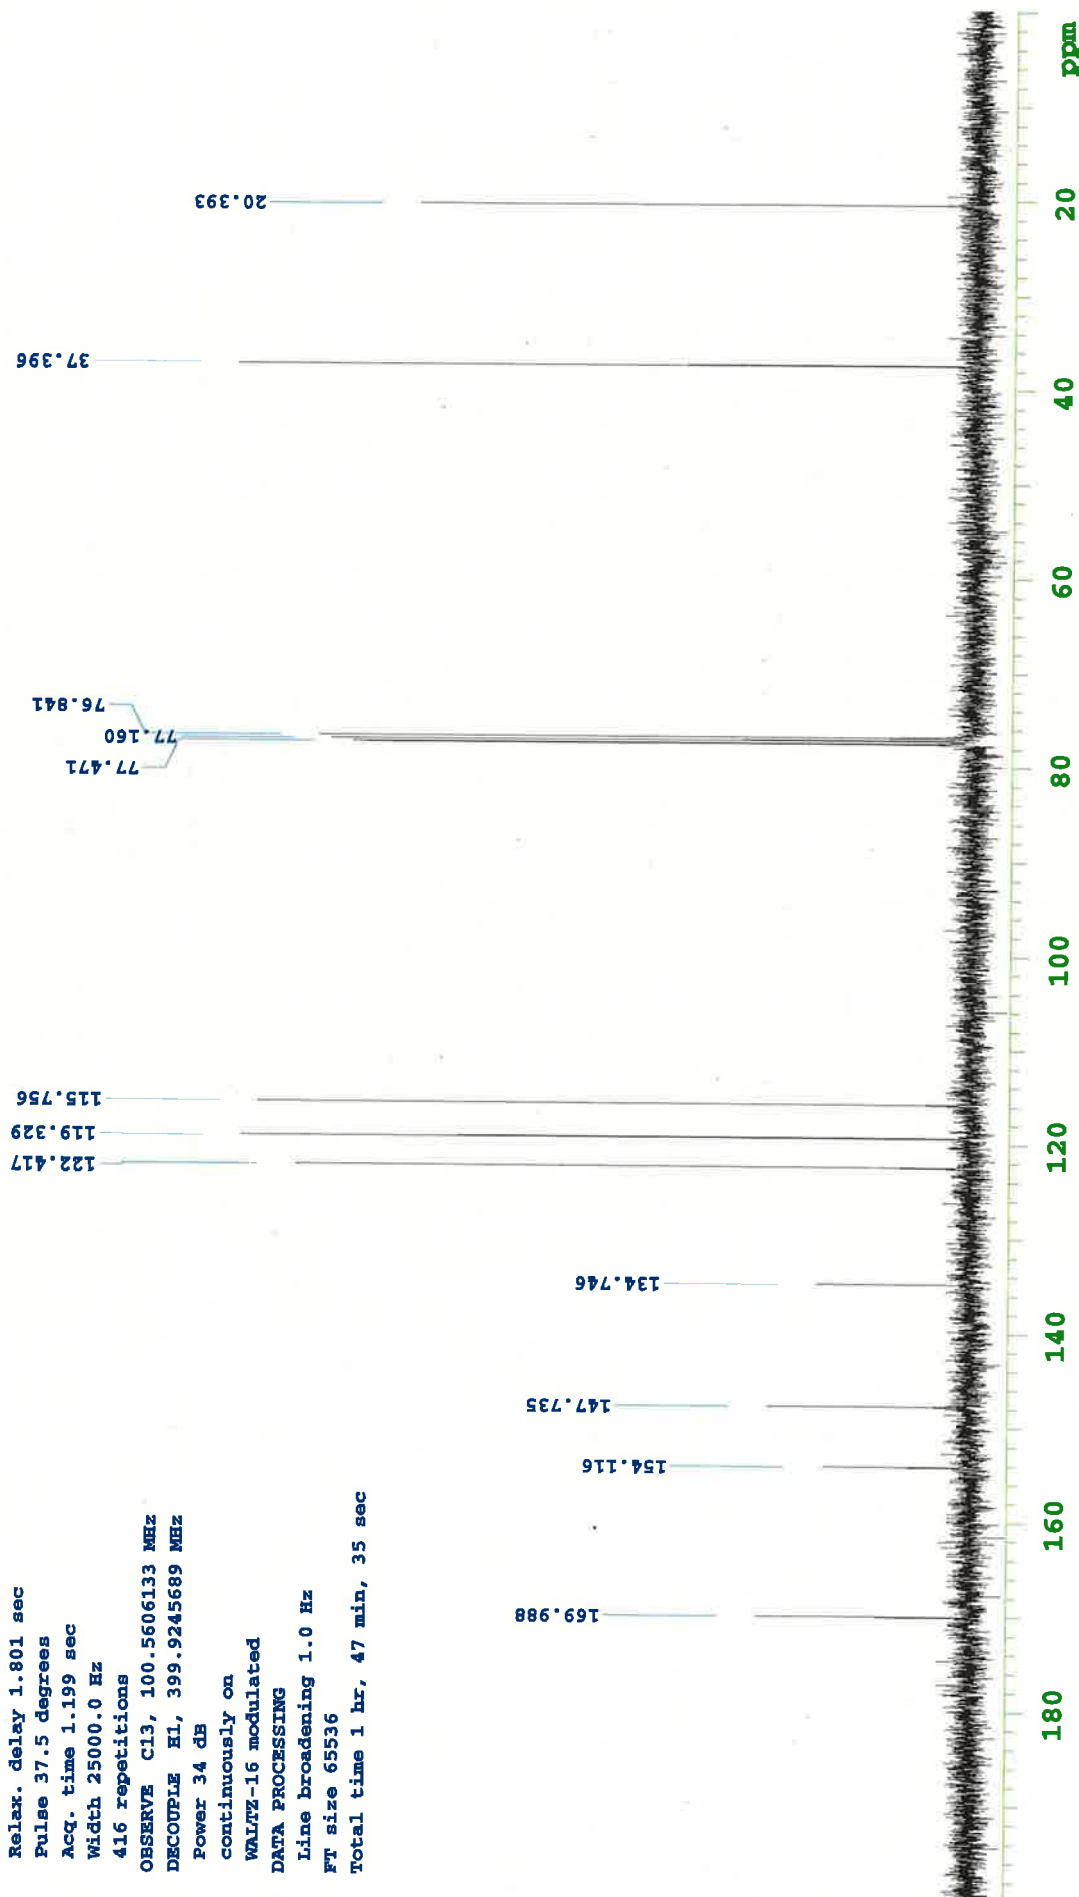

|         |                                                                |    |          |
|---------|----------------------------------------------------------------|----|----------|
| Formula | C <sub>15</sub> H <sub>13</sub> NO <sub>3</sub> S <sub>2</sub> | FW | 319.3986 |
|---------|----------------------------------------------------------------|----|----------|

|                        |                |               |                     |                  |         |                        |                      |             |
|------------------------|----------------|---------------|---------------------|------------------|---------|------------------------|----------------------|-------------|
| Acquisition Time (sec) | 2.7320         | Comment       | STANDARD 1H OBSERVE |                  | Date    | Feb 25 2012            | Date Stamp           | Feb 25 2012 |
| File Name              | C:\USR\NMR\FID |               | Frequency (MHz)     | 399.92           | Nucleus | 1H                     | Number of Transients | 32          |
| Original Points Count  | 16379          | Points Count  | 16384               | Pulse Sequence   | s2pul   | Receiver Gain          | 12.00                | Solvent     |
| Spectrum Offset (Hz)   | 2252.9128      | Spectrum Type | STANDARD            | Sweep Width (Hz) | 5995.20 | Temperature (degree C) | AMBIENT TEMPERATURE  |             |
| CHLOROFORM-d           |                |               |                     |                  |         |                        |                      |             |

<sup>1</sup>H NMR (400 MHz, CHLOROFORM-d) δ 7.66-7.80 (m, 3H), 7.45 (d, *J*=2.56 Hz, 1H), 7.30 (d, *J*=8.42 Hz, 2H), 7.11 (dd, *J*=2.38, 8.60 Hz, 1H), 2.81 (s, 3H), 2.44 (s, 3H)

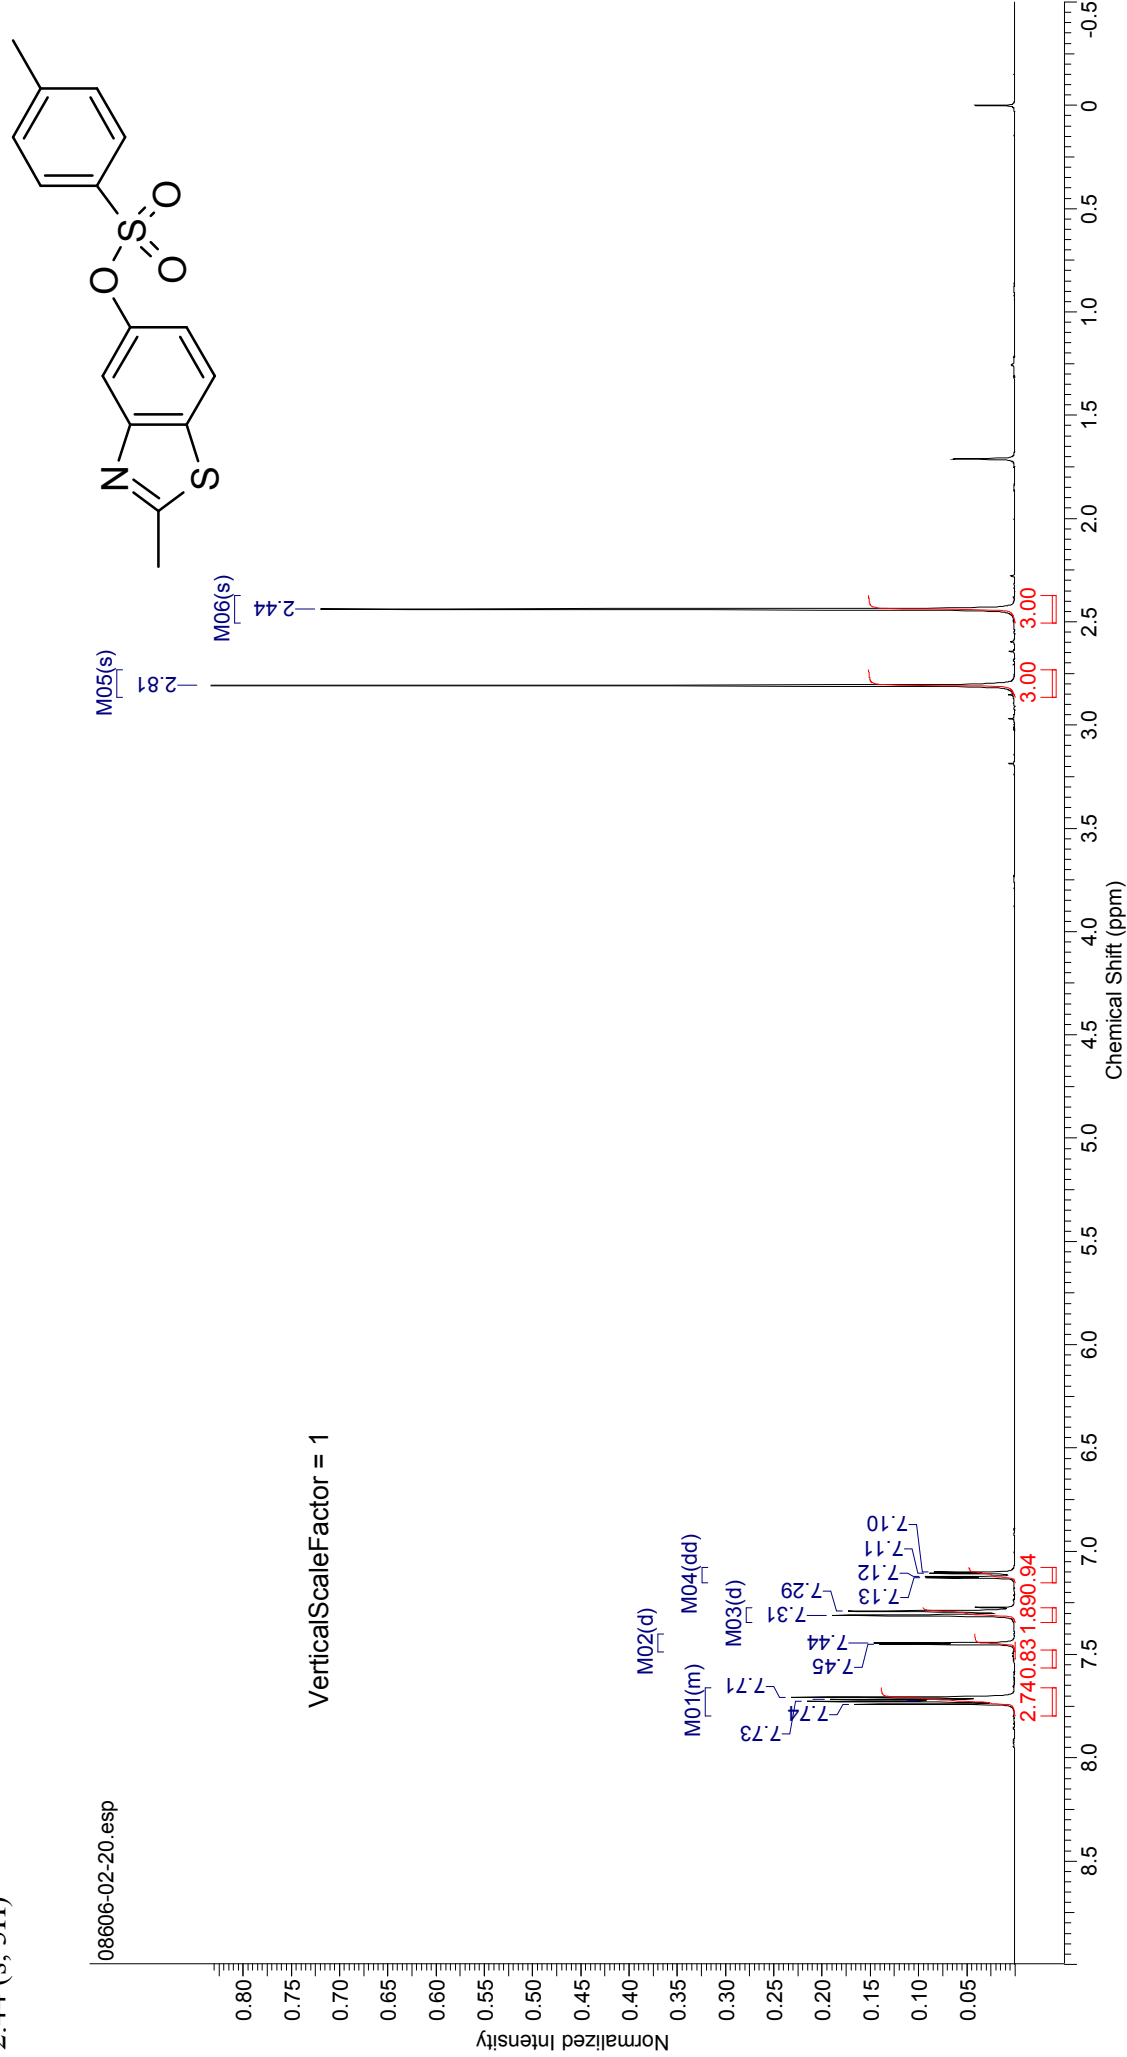

13C OBSERVE

Pulse Sequence: s2pul

Solvent: CDC13

Ambient temperature

Mercury-400BB "6Fback"

Relax. delay 1.801 sec

Pulse 37.5 degrees

Acq. time 1.199 sec

Width 25000.0 Hz

320 repetitions

OBSERVE C13, 100.5606110 MHz

DECOUPLE H1, 399.9245689 MHz

Power 34 dB

continuously on

WALTZ-16 modulated

DATA PROCESSING

Line broadening 1.0 Hz

FT size 65536

Total time 1 hr, 47 min, 35 sec

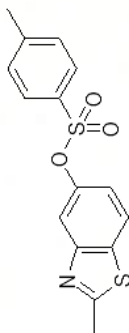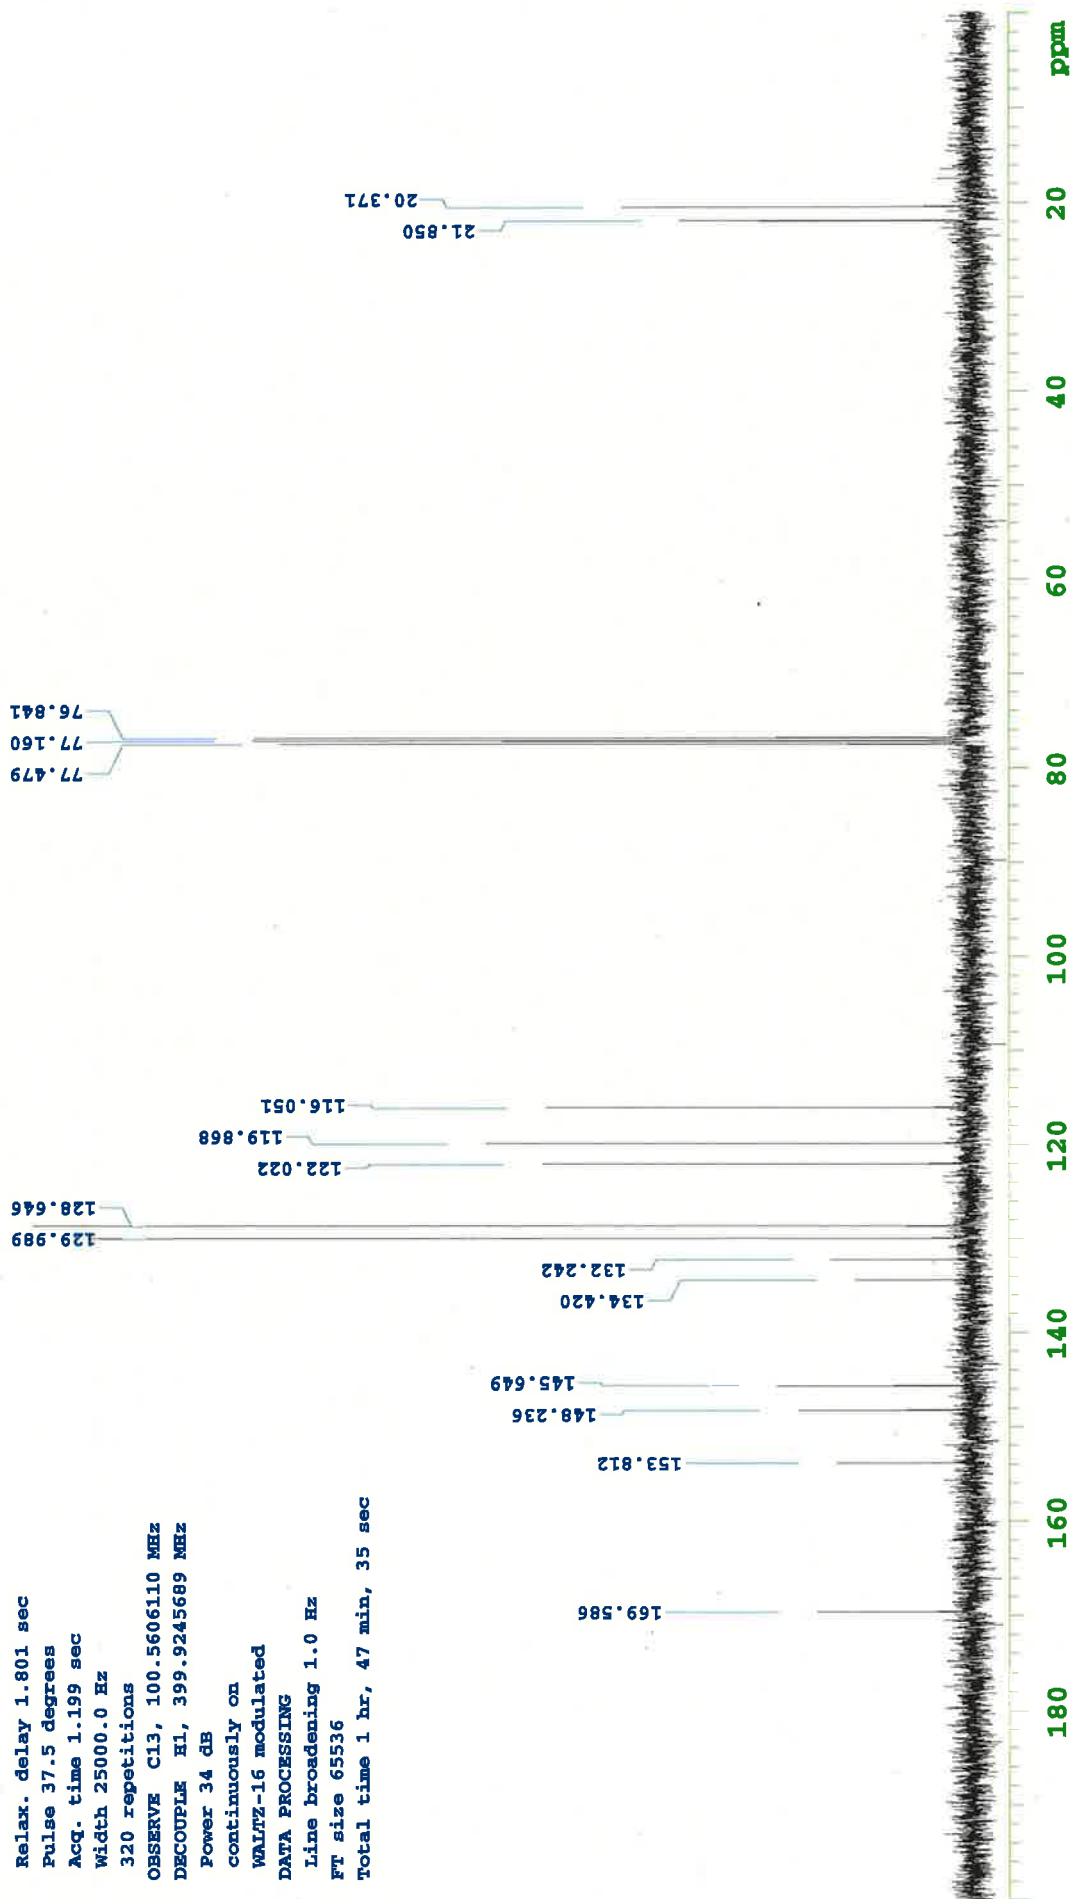

|         |                                                     |    |          |
|---------|-----------------------------------------------------|----|----------|
| Formula | C <sub>12</sub> H <sub>10</sub> ClNO <sub>2</sub> S | FW | 267.7313 |
|---------|-----------------------------------------------------|----|----------|

|                        |                     |                      |                     |                       |                |                  |
|------------------------|---------------------|----------------------|---------------------|-----------------------|----------------|------------------|
| Acquisition Time (sec) | 2.7320              | Comment              | STANDARD 1H OBSERVE |                       | Date           | Mar 20 2012      |
| Date Stamp             | Mar 20 2012         |                      | File Name           |                       | C:\USR\NMR\FID | Frequency (MHz)  |
| Nucleus                | 1H                  | Number of Transients | 32                  | Original Points Count | 16379          | Pulse Sequence   |
| Receiver Gain          | 20.00               | Solvent              | DMSO-d6             | Spectrum Offset (Hz)  | 2247.6611      | Sweep Width (Hz) |
| Temperature (degree C) | AMBIENT TEMPERATURE |                      |                     |                       |                |                  |
|                        |                     |                      |                     | Spectrum Type         | STANDARD       | 5995.20          |

<sup>1</sup>H NMR (400 MHz, DMSO-d<sub>6</sub>) δ 8.02 (dd, J=1.46, 7.68 Hz, 1H), 7.54-7.64 (m, 2H), 7.40-7.47 (m, 2H), 7.35-7.40 (m, 2H), 7.28-7.33 (m, 3H)

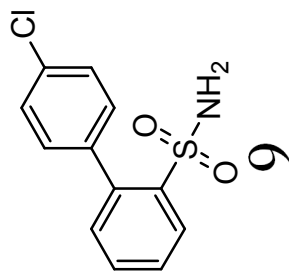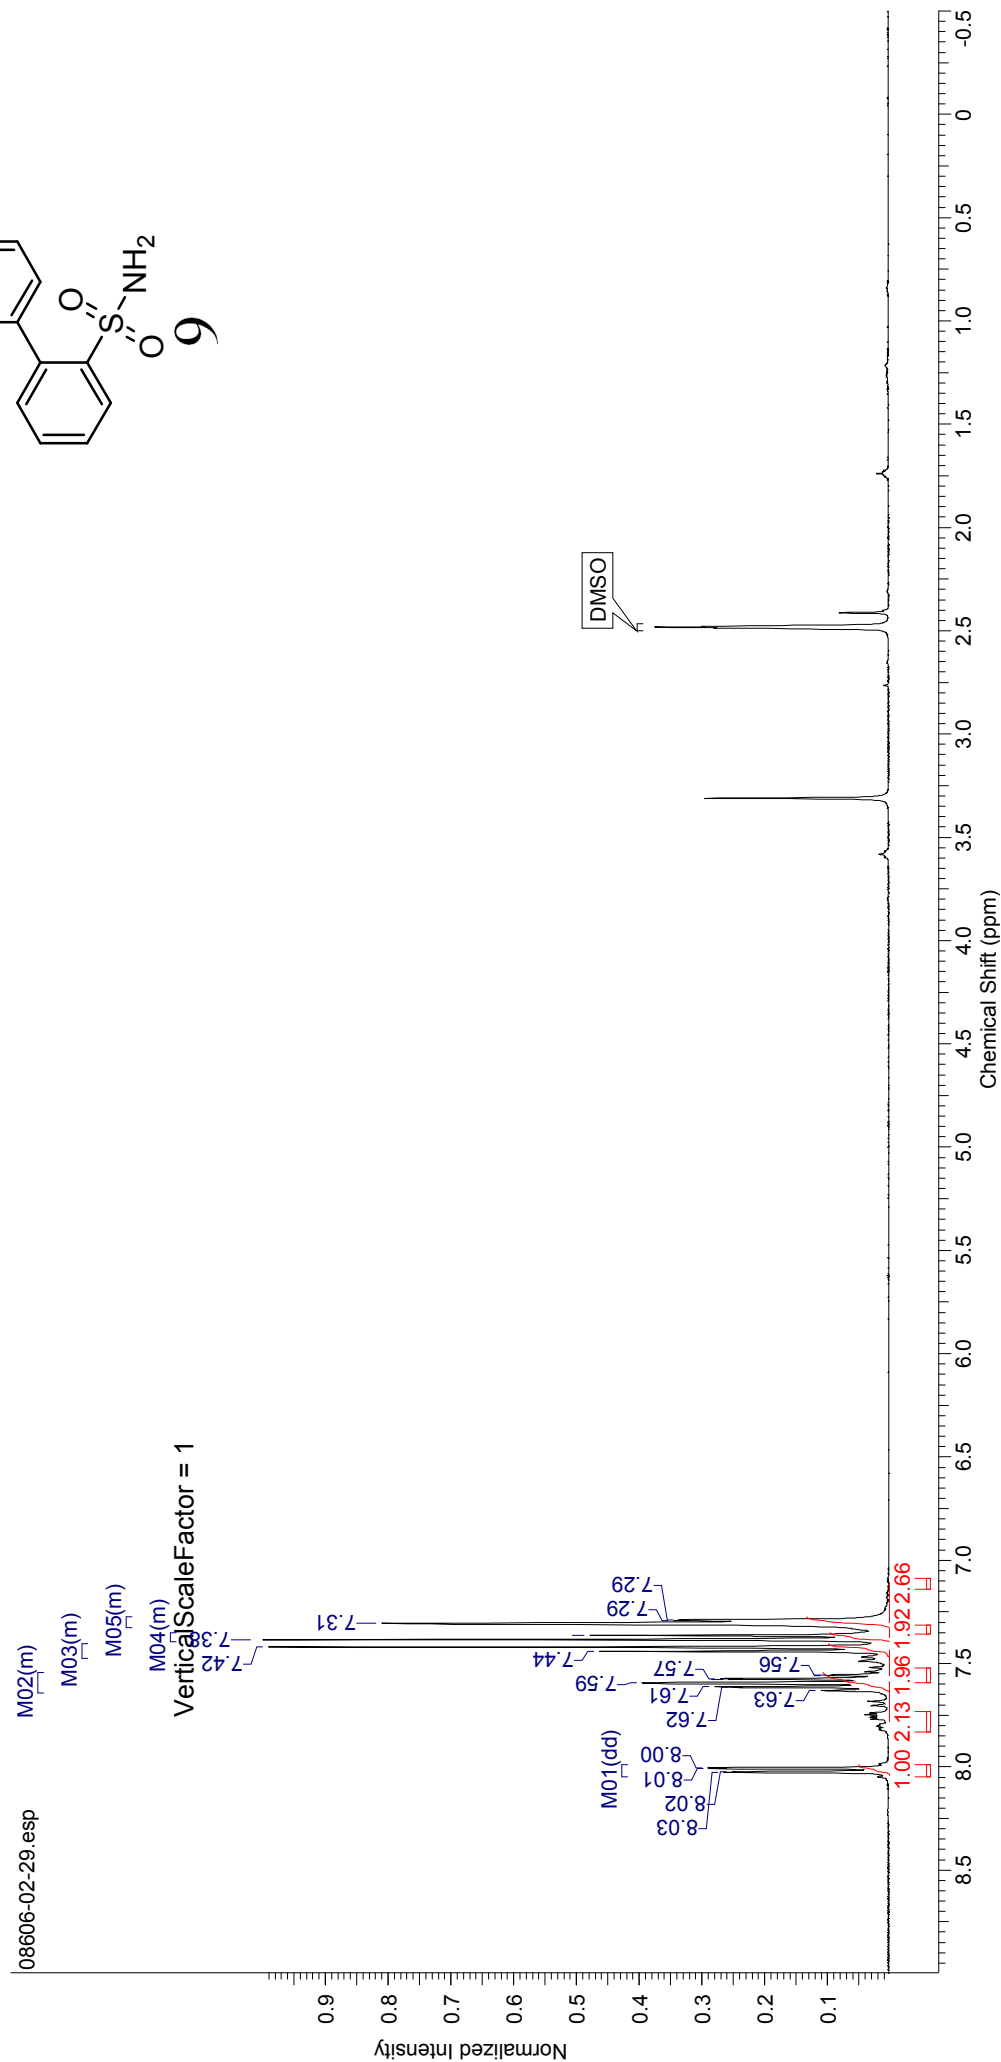

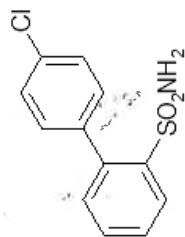

9

13C OBSERVE

Pulse Sequence: s2pul

Solvent: DMSO

Ambient temperature

Mercury-400BB "6Fback"

Relax. delay 1.801 sec

Pulse 37.5 degrees

Acq. time 1.199 sec

Width 25000.0 Hz

448 repetitions

OBSERVE C13, 100.5611445 MHz

DECOUPLE H1, 399.9264685 MHz

Power 34 dB

continuously on

WALTZ-16 modulated

DATA PROCESSING

Line broadening 1.0 Hz

Ft size 65536

Total time 3 hr, 43 min, 2 sec

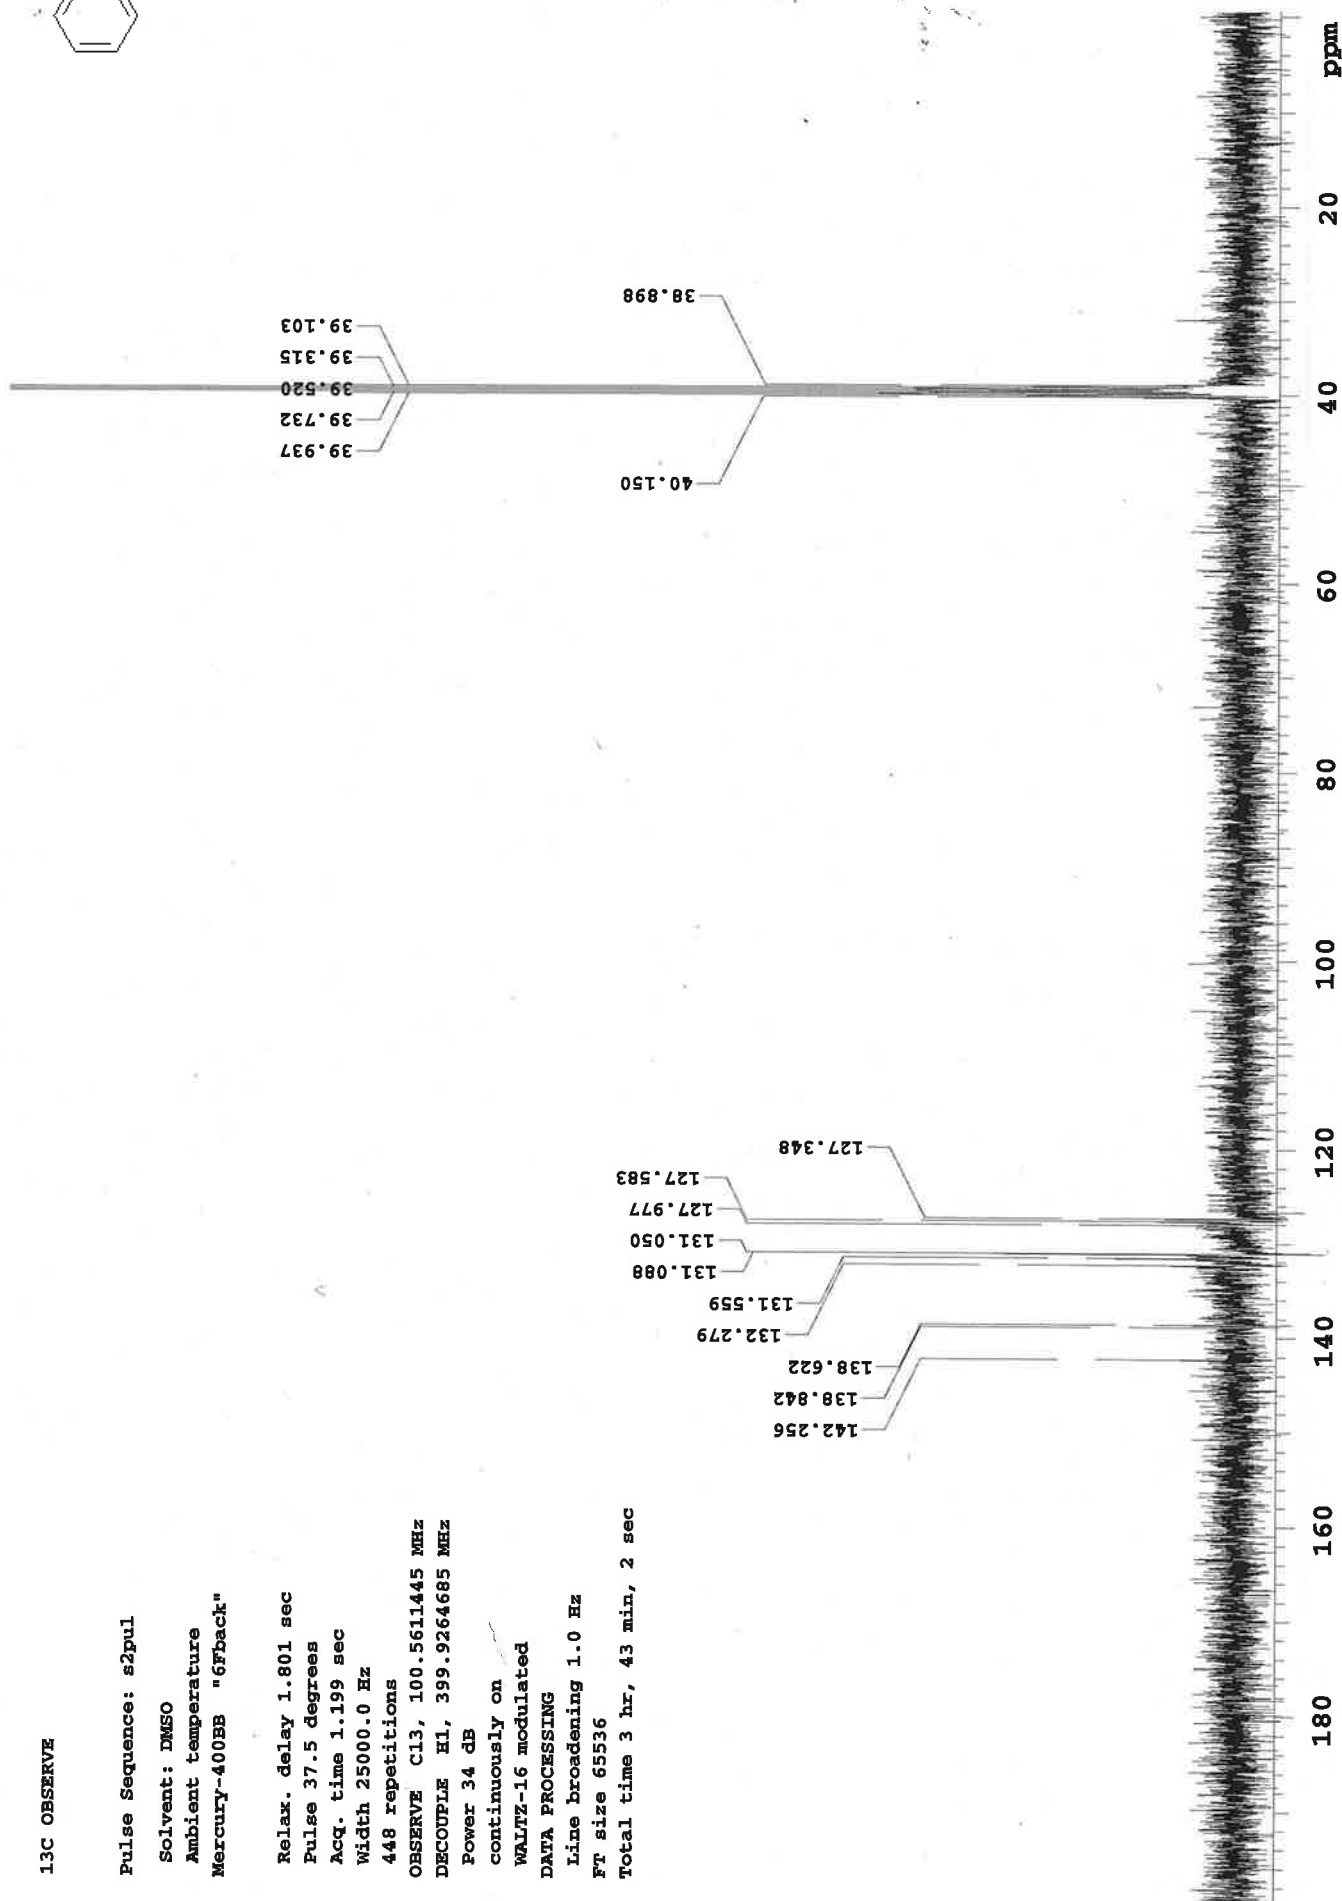

|                        |             |                      |                     |                      |             |                  |         |
|------------------------|-------------|----------------------|---------------------|----------------------|-------------|------------------|---------|
| Acquisition Time (sec) | 2.7320      | Comment              | STANDARD 1H OBSERVE | Date                 | Mar 20 2012 | Frequency (MHz)  | 399.93  |
| Date Stamp             | Mar 20 2012 | File Name            | C:\USRR\NMR\FID     | Points Count         | 16384       | Pulse Sequence   | s2pul   |
| Nucleus                | 1H          | Number of Transients | 32                  | Spectrum Type        | STANDARD    | Sweep Width (Hz) | 5995.20 |
| Receiver Gain          | 20.00       | Solvent              | DMSO-d6             | Spectrum Offset (Hz) | 2247.6611   |                  |         |
| Temperature (degree C) | AMBIENT     | TEMPERATURE          |                     |                      |             |                  |         |

<sup>1</sup>H NMR (400 MHz, DMSO-d<sub>6</sub>) δ 8.97 (t, *J*=5.86 Hz, 1H), 8.86 (t, *J*=5.86 Hz, 1H), 7.99-8.05 (m, 1H), 7.48-7.60 (m, 6H), 7.45 (d, *J*=5.12 Hz, 1H), 7.33-7.39 (m, 4H), 7.25-7.30 (m, 1H), 7.21 (d, *J*=3.66 Hz, 1H), 7.16 (br. s., 2H), 7.11 (d, *J*=3.66 Hz, 1H), 7.04 (dd, *J*=3.84, 4.94 Hz, 1H), 7.00 (d, *J*=3.66 Hz, 1H), 4.53 (d, *J*=5.49 Hz, 2H), 4.47 (d, *J*=6.22 Hz, 2H)

VerticalScaleFactor = 1

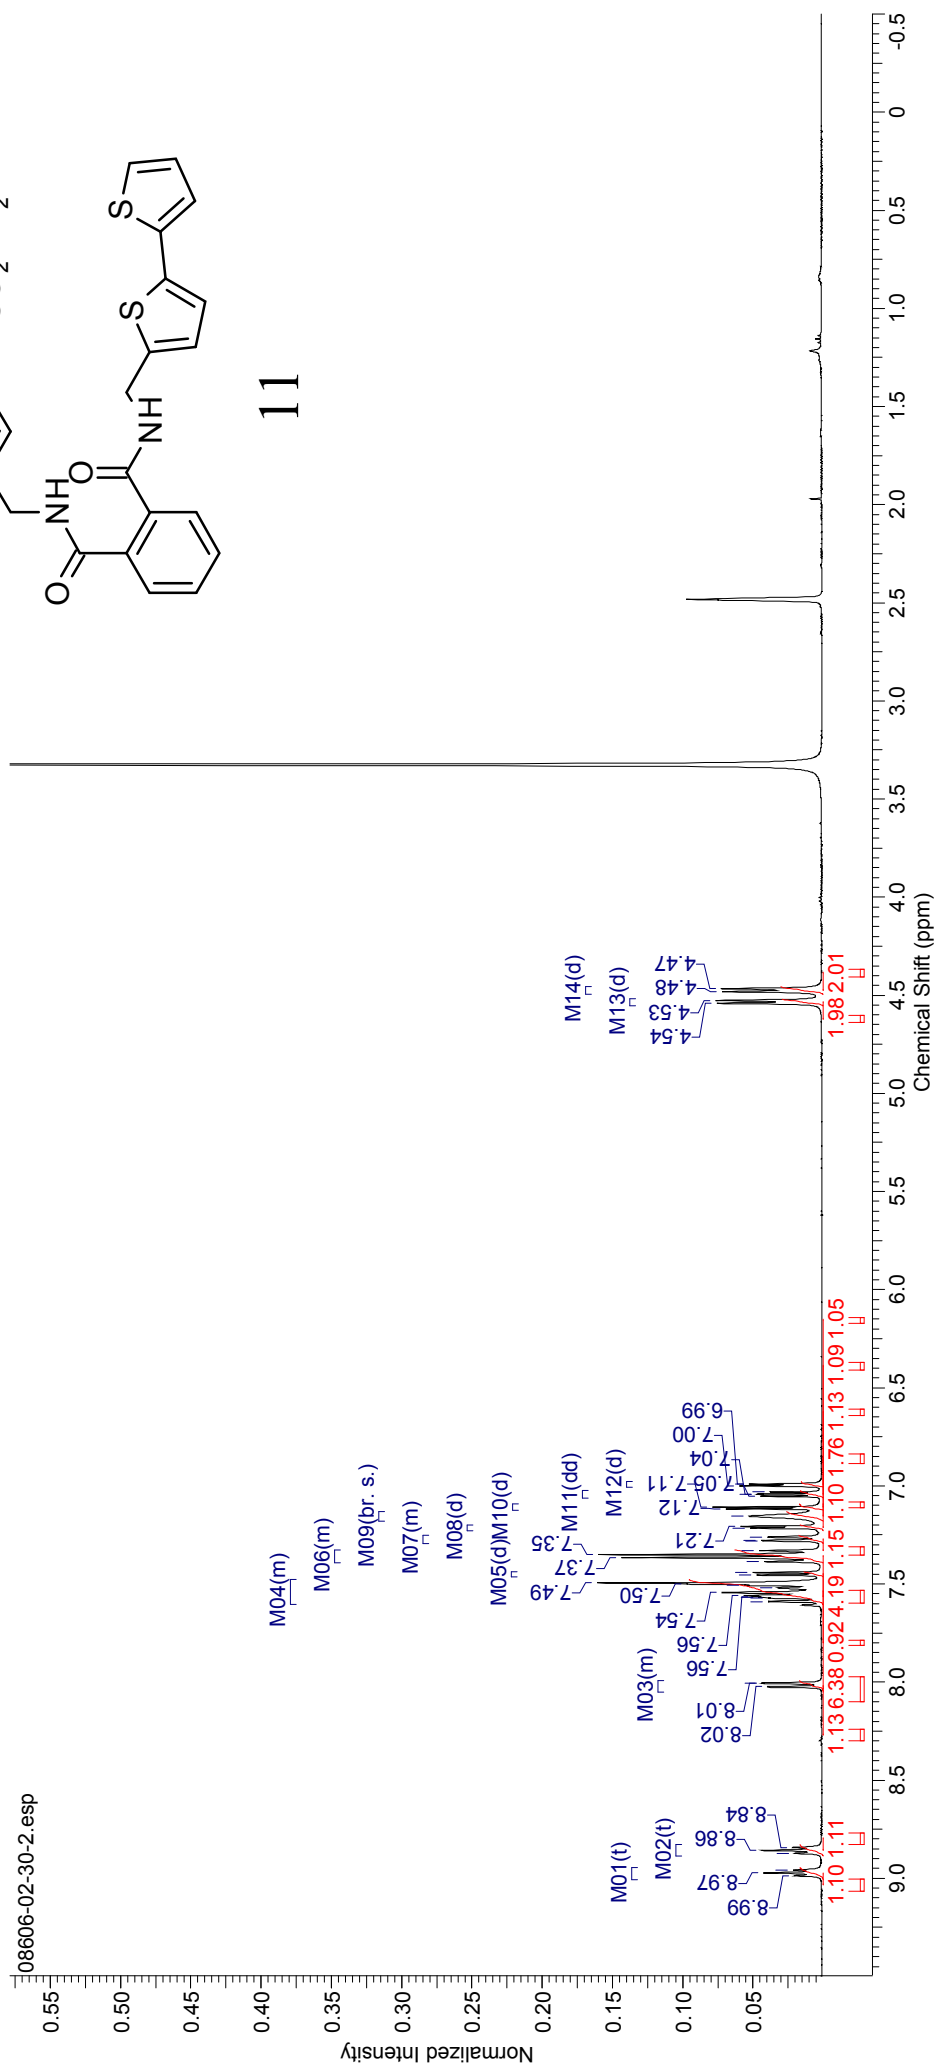

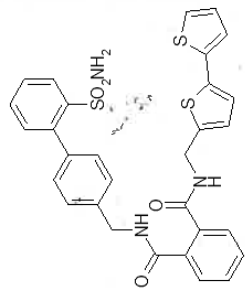

11

13C OBSERVE

Pulse Sequence: s2pul

Solvent: DMSO

Ambient temperature

File: 08606-02-30

Mercury-400BB "6Fback"

Relax. delay 1.801 sec

Pulse 37.5 degrees

Acq. time 1.199 sec

Width 25000.0 Hz

2512 repetitions

OBSERVE C13, 100.5611452 MHz

DECOUPLE H1, 399.9264685 MHz

Power 34 dB

continuously on

WALTZ-16 modulated

DATA PROCESSING

Line broadening 1.0 Hz

FT size 65536

Total time 7 hr 26 min

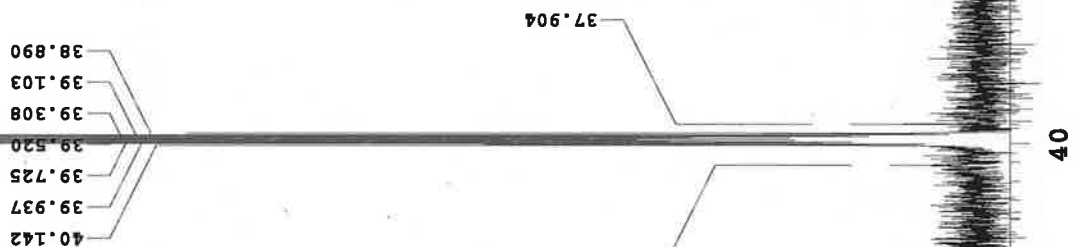

Supplement: Supplementary file 1 [file 4160971]
